# Supplementary material for: Regiodivergent sulfonylarylation of 1,3-enynes via nickel/photoredox dual catalysis
Source: PubMed Central journal article supplement (PMC8528021; doi:10.1039/d1sc04320j), 2021-09-20

Supporting Information for

**Regiodivergent Sulfonylarylation of 1,3-Enynes via Nickel/Photoredox  
Dual Catalysis**

Ya Chen,<sup>1</sup> Kun Zhu,<sup>1,2</sup> Qingqin Huang<sup>1,2</sup> and Yixin Lu<sup>\*,1,2</sup>

<sup>1</sup> Department of Chemistry, National University of Singapore, 3 Science Drive 3,  
Singapore, 117543

<sup>2</sup> Joint School of National University of Singapore and Tianjin University, International  
Campus of Tianjin University, Binhai New City, Fuzhou, Fujian, PR China, 350207

E-mail: [chmlyx@nus.edu.sg](mailto:chmlyx@nus.edu.sg)

**Contents**

|                                                                   |     |
|-------------------------------------------------------------------|-----|
| 1. General information -----                                      | S2  |
| 2. Optimization of reaction conditions -----                      | S3  |
| 3. General procedure for the synthesis of 1,3-enynes -----        | S7  |
| 4. General procedure for 1,4-sulfonylarylation of 1,3-enynes----- | S14 |
| 5. General procedure for 3,4-sulfonylarylation of 1,3-enynes----- | S37 |
| 6. Scale-up syntheses and further transformations-----            | S47 |
| 7. Mechanistic experiments -----                                  | S57 |
| 8. X-ray crystallography data -----                               | S64 |
| 9. References -----                                               | S68 |
| 10. Copy of NMR spectra-----                                      | S69 |

## 1. General information

Unless otherwise noted, all experiments were carried out under an atmosphere of nitrogen and anhydrous conditions.  $^1\text{H}$  NMR and  $^{13}\text{C}$  NMR spectra were recorded on Bruker AMX 400 Spectrometer ( $^1\text{H}$  400 MHz and  $^{13}\text{C}$  100 MHz, respectively) and Bruker AMX 500 Spectrometer ( $^1\text{H}$  500 MHz and  $^{13}\text{C}$  125 MHz, respectively). Chemical shifts ( $\delta$ ) were given in ppm and were referenced to residual solvent or TMS peaks. All high resolution mass spectra were obtained on a Bruker micrOTOFQ II (ESI). All the solvents were purified according to the standard procedures. Substrates of sodium sulfinates were synthesized from the corresponding sulfonyl chlorides according to the previous report.<sup>[1]</sup> All other chemicals which are commercially available were employed without further purification.

## 2. Optimization of reaction conditions

### 2.1 1,4-Sulfonylarylation of 1,3-enynes

**Table S1.** Screening of the ratios of the starting materials and solvents [a]



| Entry    | 1a (equiv) | 2a (equiv) | 3a (equiv) | Solvent     | 4a: 4a' <sup>[b]</sup> | Yield of 4a (%) <sup>[c]</sup> |
|----------|------------|------------|------------|-------------|------------------------|--------------------------------|
| 1        | 1.0        | 1.0        | 1.2        | DMSO        | 9: 1                   | 37                             |
| 2        | 1.0        | 2.0        | 1.2        | DMSO        | 1.4: 1                 | 43                             |
| 3        | 1.5        | 1.0        | 1.2        | DMSO        | 18: 1                  | 42                             |
| <b>4</b> | <b>2.0</b> | <b>1.0</b> | <b>1.2</b> | <b>DMSO</b> | <b>&gt;20: 1</b>       | <b>55</b>                      |
| 5        | 2.0        | 1.0        | 2.0        | DMSO        | 5: 1                   | 40                             |
| 6        | 2.0        | 1.0        | 1.2        | DMA         | >20: 1                 | 10                             |
| 7        | 2.0        | 1.0        | 1.2        | DMF         | >20: 1                 | 39                             |
| 8        | 2.0        | 1.0        | 1.2        | NMP         | ---                    | 0                              |
| 9        | 2.0        | 1.0        | 1.2        | MeCN        | ---                    | 0                              |
| 10       | 2.0        | 1.0        | 1.2        | MeOH        | ---                    | 0                              |
| 11       | 2.0        | 1.0        | 1.2        | THF         | ---                    | 0                              |

[a] Reaction conditions: Ru(bpy)<sub>3</sub>Cl<sub>2</sub>·6H<sub>2</sub>O (1 mol%), NiCl<sub>2</sub>·glyme (10 mol%), dtbbpy (14 mol%), solvent (0.1 M), at room temperature, 30 W blue LEDs, 20 h. [b] Determined by <sup>1</sup>H NMR analysis of crude product. [c] Isolated yield.

**Table S2.** Screening of photocatalysts, nickel sources and ligands [a]

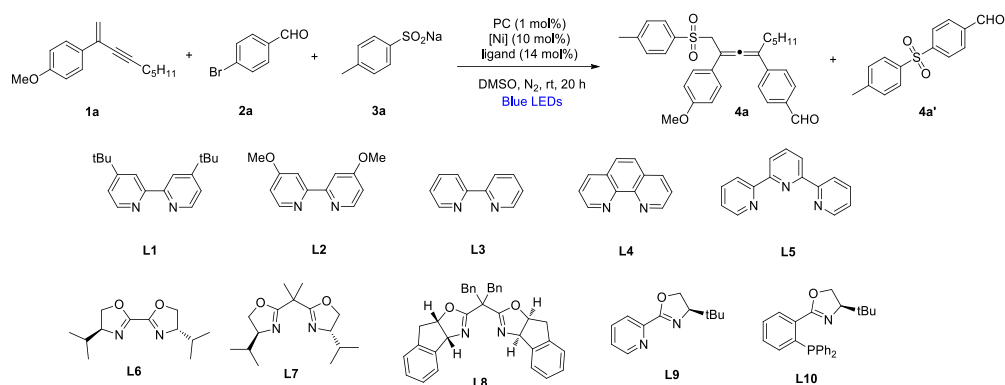

| Entry                   | PC                                                               | [Ni]                                 | Ligand     | <b>4a</b> : <b>4a'</b> <sup>[b]</sup> | Yield of <b>4a</b> (%) <sup>[c]</sup> |
|-------------------------|------------------------------------------------------------------|--------------------------------------|------------|---------------------------------------|---------------------------------------|
| 1                       | Ru(bpy) <sub>3</sub> Cl <sub>2</sub> ·6H <sub>2</sub> O          | NiCl <sub>2</sub> ·glyme             | <b>L1</b>  | >20: 1                                | 55                                    |
| 2                       | Ru(bpy) <sub>3</sub> (PF <sub>6</sub> ) <sub>2</sub>             | NiCl <sub>2</sub> ·glyme             | <b>L1</b>  | >20: 1                                | 45                                    |
| 3                       | [Ir(dFCF <sub>3</sub> ppy) <sub>2</sub> (dtbbpy)]PF <sub>6</sub> | NiCl <sub>2</sub> ·glyme             | <b>L1</b>  | >20: 1                                | 62                                    |
| 4                       | 4CzIPN                                                           | NiCl <sub>2</sub> ·glyme             | <b>L1</b>  | >20: 1                                | 64                                    |
| 5                       | 4CzIPN                                                           | NiCl <sub>2</sub>                    | <b>L1</b>  | >20: 1                                | 35                                    |
| 6                       | 4CzIPN                                                           | NiCl <sub>2</sub> ·6H <sub>2</sub> O | <b>L1</b>  | >20: 1                                | 11                                    |
| 7                       | 4CzIPN                                                           | NiCl <sub>2</sub> ·glyme             | <b>L2</b>  | >20: 1                                | 73                                    |
| 8                       | 4CzIPN                                                           | NiCl <sub>2</sub> ·glyme             | <b>L3</b>  | >20: 1                                | 62                                    |
| 9                       | 4CzIPN                                                           | NiCl <sub>2</sub> ·glyme             | <b>L4</b>  | ---                                   | 0                                     |
| 10                      | 4CzIPN                                                           | NiCl <sub>2</sub> ·glyme             | <b>L5</b>  | ---                                   | 0                                     |
| 11                      | 4CzIPN                                                           | NiCl <sub>2</sub> ·glyme             | <b>L6</b>  | ---                                   | 0                                     |
| 12                      | 4CzIPN                                                           | NiCl <sub>2</sub> ·glyme             | <b>L7</b>  | 7: 1                                  | 30                                    |
| 13                      | 4CzIPN                                                           | NiCl <sub>2</sub> ·glyme             | <b>L8</b>  | ---                                   | trace                                 |
| 14                      | 4CzIPN                                                           | NiCl <sub>2</sub> ·glyme             | <b>L9</b>  | 5: 1                                  | 14                                    |
| 15                      | 4CzIPN                                                           | NiCl <sub>2</sub> ·glyme             | <b>L10</b> | 1: 1                                  | 12                                    |
| <b>16<sup>[d]</sup></b> | <b>4CzIPN</b>                                                    | <b>NiCl<sub>2</sub>·glyme</b>        | <b>L2</b>  | <b>&gt;20: 1</b>                      | <b>72</b>                             |

[a] Reaction conditions: **1a** (0.2 mmol), **2a** (0.1 mmol) and **3a** (0.12 mmol) in 1.0 mL DMSO, PC (1 mol%), [Ni] (10 mol%), ligand (14 mol%), at room temperature, 30 W blue LEDs, 20 h. [b] Determined by <sup>1</sup>H NMR analysis of crude product. [c] Isolated yield. [d] 5 mol% NiCl<sub>2</sub>·glyme, 7 mol% diOMebpy.

**Table S3.** Other screening and control experiments [a]

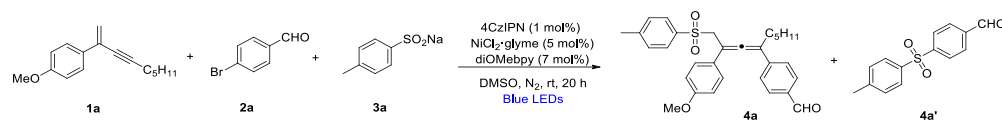

| Entry | Deviations from the reaction conditions | 4a: 4a' <sup>[b]</sup> | Yield of 4a (%) <sup>[c]</sup> |
|-------|-----------------------------------------|------------------------|--------------------------------|
| 1     | None                                    | >20: 1                 | 72                             |
| 2     | No photocatalyst                        | ---                    | 0                              |
| 3     | No light                                | ---                    | 0                              |
| 4     | No [Ni]                                 | ---                    | 0                              |
| 5     | No ligand                               | ---                    | 0                              |
| 6     | In air                                  | ---                    | 0                              |
| 7     | Addition of 10 uL H <sub>2</sub> O      | >20: 1                 | 54                             |

[a] Reaction conditions: **1a** (0.2 mmol), **2a** (0.1 mmol) and **3a** (0.12 mmol) in 1.0 mL DMSO, 4CzIPN (1 mol%), NiCl<sub>2</sub>·glyme (5 mol%), diOMebpy (7 mol%), at room temperature, 30 W blue LEDs, 20 h. [b] Determined by <sup>1</sup>H NMR analysis of crude product. [c] Isolated yield.

## 2.2 3,4-Sulfonylarylation of 1,3-enynes

**Table S4.** Screening of the reaction conditions [a]

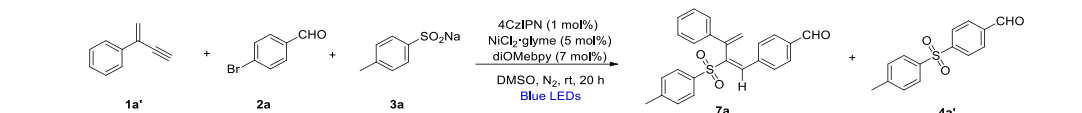

| Entry    | Ratio<br>( <b>1a'</b> / <b>2a</b> / <b>3a</b> ) | Ligand    | PC<br>(EnT energy (kcal/mol))                                           | <b>7a</b> : <b>4a'</b> <sup>[b]</sup> | Yield of<br><b>7a</b> (%) <sup>[c]</sup> | <i>E/Z</i> of<br><b>7a</b> (%) <sup>[b]</sup> |
|----------|-------------------------------------------------|-----------|-------------------------------------------------------------------------|---------------------------------------|------------------------------------------|-----------------------------------------------|
| 1        | 1:1:1.2                                         | <b>L2</b> | 4CzIPN                                                                  | 5: 1                                  | 49                                       | >20: 1                                        |
| <b>2</b> | <b>2:1:1.2</b>                                  | <b>L2</b> | <b>4CzIPN</b>                                                           | <b>5: 1</b>                           | <b>70</b>                                | <b>&gt;20: 1</b>                              |
| 3        | 3:1:1.2                                         | <b>L2</b> | 4CzIPN                                                                  | 5: 1                                  | 18                                       | >20: 1                                        |
| 4        | 2:1:1.2                                         | <b>L1</b> | 4CzIPN                                                                  | 10: 1                                 | 47                                       | >20: 1                                        |
| 5        | 2:1:1.2                                         | <b>L4</b> | 4CzIPN                                                                  | 5: 1                                  | 50                                       | >20: 1                                        |
| 6        | 2:1:1.2                                         | <b>L5</b> | 4CzIPN                                                                  | ---                                   | 0                                        | ---                                           |
| 7        | 2:1:1.2                                         | <b>L2</b> | Ru(bpy) <sub>3</sub> Cl <sub>2</sub> ·6H <sub>2</sub> O (46.5)          | 5: 1                                  | 62                                       | >20: 1                                        |
| 8        | 2:1:1.2                                         | <b>L2</b> | Ru(bpy) <sub>3</sub> (PF <sub>6</sub> ) <sub>2</sub> (46.8)             | 7: 1                                  | 61                                       | >20: 1                                        |
| 9        | 2:1:1.2                                         | <b>L2</b> | Ir(ppy) <sub>3</sub> (55.2)                                             | 3: 1                                  | 50                                       | >20: 1                                        |
| 10       | 2:1:1.2                                         | <b>L2</b> | [Ir(dFCF <sub>3</sub> ppy) <sub>2</sub> (dtbbpy)]PF <sub>6</sub> (59.4) | 5: 1                                  | 56                                       | 7: 1                                          |
| 11       | 2:1:1.2                                         | <b>L2</b> | Ir(dFppy) <sub>3</sub> (60.1)                                           | 4: 1                                  | 52                                       | 1.5: 1                                        |

[a] Reaction conditions: **1a'** (0.2 mmol), **2a** (0.1 mmol) and **3a** (0.12 mmol) in 1.0 mL DMSO, 4CzIPN (1 mol%), NiCl<sub>2</sub>·glyme (5 mol%), diOMebpy (7 mol%), at room temperature, 30 W blue LEDs, 20 h. [b] Determined by <sup>1</sup>H NMR analysis of crude product. [c] Isolated yield.

**Table S5.** Control experiments [a]

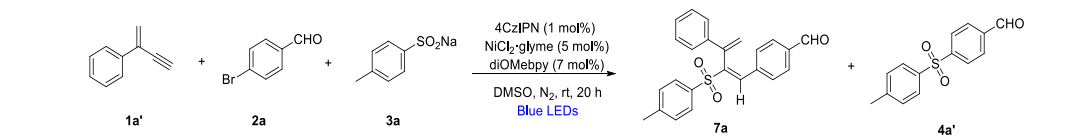

| Entry | Deviations from the reaction | <b>7a</b> : <b>4a'</b> <sup>[b]</sup> | Yield of <b>7a</b> (%) <sup>[c]</sup> | <i>E/Z</i> of <b>7a</b> (%) <sup>[b]</sup> |
|-------|------------------------------|---------------------------------------|---------------------------------------|--------------------------------------------|
| 1     | None                         | 5: 1                                  | 70                                    | >20: 1                                     |
| 2     | No photocatalyst             | ---                                   | 0                                     |                                            |
| 3     | No light                     | ---                                   | 0                                     |                                            |
| 4     | No [Ni]                      | ---                                   | 0                                     |                                            |
| 5     | No ligand                    | ---                                   | 0                                     |                                            |
| 6     | In air                       | ---                                   | 0                                     |                                            |

[a] Reaction conditions: **1a'** (0.2 mmol), **2a** (0.1 mmol) and **3a** (0.12 mmol) in 1.0 mL DMSO, 4CzIPN (1 mol%), NiCl<sub>2</sub>·glyme (5 mol%), diOMebpy (7 mol%), at room temperature, 30 W blue LEDs, 20 h. [b] Determined by <sup>1</sup>H NMR analysis of crude product. [c] Isolated yield.

### 3. General procedure for the synthesis of 1,3-enynes<sup>[2]</sup>

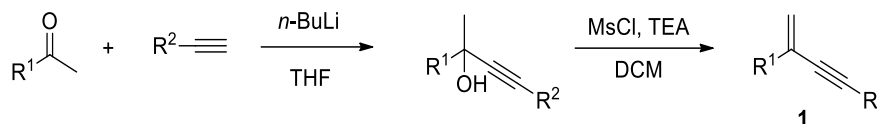

**Procedure A:** Under nitrogen atmosphere, *n*-BuLi (2.0 M in hexane, 5 mmol, 2.5 mL) was added dropwise to a solution of alkyne (5 mmol) in anhydrous THF (20 mL) at -78 °C. After addition, the resulting solution was stirred at room temperature for one hour. Then, cooled to -78 °C again, ketone (5 mmol) in THF (10 mL) was added dropwise. The reaction mixture was allowed to warm to room temperature and was monitored by TLC for completion. Once completion the reaction was quenched with saturated aqueous NH<sub>4</sub>Cl and extracted with EtOAc three times. The combined organic layer was dried over Na<sub>2</sub>SO<sub>4</sub> and concentrated under reduced pressure to afford the crude propargyl alcohol.

The resulting propargyl alcohol was dissolved in DCM (30 mL), and the mixture was cooled to 0 °C. TEA (25 mmol, 5 equiv) was added to this solution and methylsulfonyl chloride (12.5 mmol, 2.5 equiv) sequentially. After one hour the reaction was monitored by TLC for completion. Once completion the reaction was quenched with saturated aqueous NH<sub>4</sub>Cl. The aqueous layer was extracted with DCM and the combined organic layers were washed with brine, dried over Na<sub>2</sub>SO<sub>4</sub>, filtered, and concentrated under reduced pressure. The crude material was purified by flash chromatography to yield the 1,3-enyne **1**.

The analytical data of the new products are summarized below.

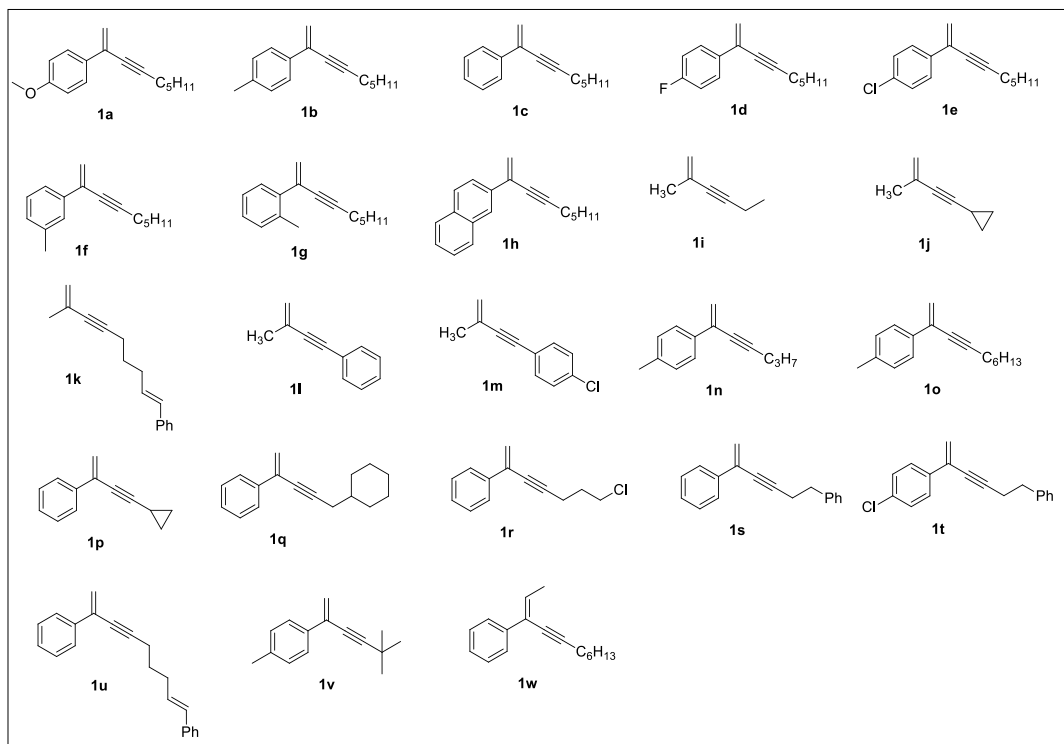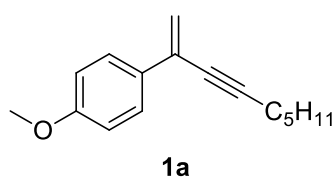

**1-methoxy-4-(non-1-en-3-yn-2-yl)benzene (1a):** Pale yellow oil, isolated yield 50%.  $^1\text{H}$  NMR (400 MHz,  $\text{CDCl}_3$ )  $\delta$  7.52 (d,  $J = 9.2$  Hz, 2H), 6.79 (d,  $J = 8.8$  Hz, 2H), 5.65 (d,  $J = 1.2$  Hz, 1H), 5.40 (d,  $J = 1.2$  Hz, 1H), 3.73 (s, 3H), 2.32 (t,  $J = 7.0$  Hz, 2H), 1.56 – 1.49 (m, 2H), 1.40 – 1.25 (m, 4H), 0.85 (t,  $J = 7.2$  Hz, 3H).  $^{13}\text{C}$  NMR (100 MHz,  $\text{CDCl}_3$ )  $\delta$  159.6, 130.5, 130.3, 127.3, 117.4, 113.6, 91.8, 79.9, 55.3, 31.6, 28.5, 22.2, 19.4, 14.0. MS (ESI): 229.2  $[\text{M}+\text{H}]^+$ .

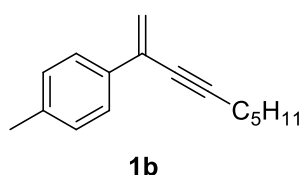

**1-methyl-4-(non-1-en-3-yn-2-yl)benzene (1b):** Pale yellow oil, isolated yield 50%.  $^1\text{H}$  NMR (400 MHz,  $\text{CDCl}_3$ )  $\delta$  7.56 (d,  $J = 8.0$  Hz, 2H), 7.17-7.15 (m, 2H), 5.81 (d,  $J = 1.2$  Hz, 1H), 5.54 (d,  $J = 1.2$  Hz, 1H), 2.42 (t,  $J = 7.2$  Hz, 2H), 2.37 (s, 3H), 1.65 – 1.56 (m, 2H), 1.49 – 1.34 (m, 4H), 0.94 (t,  $J = 7.2$  Hz, 3H).  $^{13}\text{C}$  NMR (100 MHz,  $\text{CDCl}_3$ )  $\delta$  137.9, 135.0, 130.8, 128.9, 125.9, 118.4, 91.8, 79.9, 31.2, 28.5, 22.2, 21.1, 19.4, 14.0. MS (ESI): 213.2  $[\text{M}+\text{H}]^+$ .



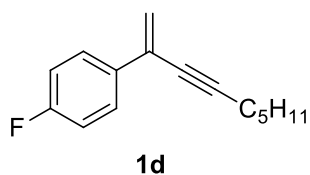

**1-fluoro-4-(non-1-en-3-yn-2-yl)benzene (1d):** Pale yellow oil, isolated yield 59%.  $^1\text{H}$  NMR (400 MHz,  $\text{CDCl}_3$ )  $\delta$  7.64 – 7.61 (m, 2H), 7.05 – 7.00 (m, 2H), 5.77 (d,  $J = 1.2$  Hz, 1H), 5.56 – 5.55 (m, 1H), 2.41 (t,  $J = 7.0$  Hz, 2H), 1.64 – 1.58 (m, 2H), 1.46 – 1.33 (m, 4H), 0.93 (t,  $J = 7.0$  Hz, 3H).  $^{13}\text{C}$  NMR (100 MHz,  $\text{CDCl}_3$ )  $\delta$  162.2 (d,  $J = 246.0$  Hz), 133.9 (d,  $J = 3.0$  Hz), 129.9, 127.8 (d,  $J = 8.0$  Hz), 119.0 (d,  $J = 1.0$  Hz), 115.1 (d,  $J = 22.0$  Hz), 92.3, 79.6, 31.2, 28.4, 22.2, 19.4, 14.0. MS (ESI): 217.1  $[\text{M}+\text{H}]^+$ .

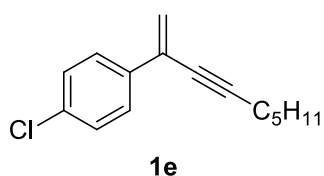

**1-chloro-4-(non-1-en-3-yn-2-yl)benzene (1e):** Pale yellow oil, isolated yield 68%.  $^1\text{H}$  NMR (400 MHz,  $\text{CDCl}_3$ )  $\delta$  7.54 (d,  $J = 8.4$  Hz, 2H), 7.27 (d,  $J = 8.4$  Hz, 2H), 5.77 (d,  $J = 0.8$  Hz, 1H), 5.55 (d,  $J = 0.8$  Hz, 1H), 2.37 (t,  $J = 7.2$  Hz, 2H), 1.59 – 1.52 (m, 2H), 1.43 – 1.29 (m, 4H), 0.89 (t,  $J = 7.2$  Hz, 3H).  $^{13}\text{C}$  NMR (100 MHz,  $\text{CDCl}_3$ )  $\delta$  136.3, 133.9, 129.9, 128.4, 127.4, 119.0, 92.5, 79.3, 31.2, 28.4, 22.2, 19.3, 14.0. MS (ESI): 233.1  $[\text{M}+\text{H}]^+$ .

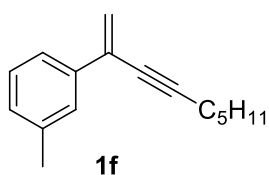

**1-methyl-3-(non-1-en-3-yn-2-yl)benzene (1f):** Pale yellow oil, isolated yield 55%.  $^1\text{H}$  NMR (500 MHz,  $\text{CDCl}_3$ )  $\delta$  7.51 – 7.48 (m, 2H), 7.28 – 7.24 (m, 1H), 7.15 – 7.13 (m, 1H), 5.85 (d,  $J = 1.5$  Hz, 1H), 5.59 (d,  $J = 1.0$  Hz, 1H), 2.44 (t,  $J = 7.0$  Hz, 2H), 2.40 (s, 3H), 1.68 – 1.62 (m, 2H), 1.51 – 1.45 (m, 2H), 1.42 – 1.37 (m, 2H), 0.96 (t,  $J = 7.3$  Hz, 3H).  $^{13}\text{C}$  NMR (125 MHz,  $\text{CDCl}_3$ )  $\delta$  137.8, 131.1, 128.8, 128.1, 126.8, 123.2, 119.2, 91.9, 79.9, 31.2, 28.4, 22.2, 21.4, 19.4, 14.0. MS (ESI): 213.2  $[\text{M}+\text{H}]^+$ .

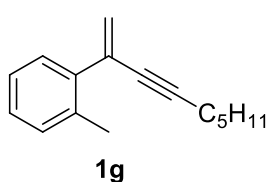

**1-methyl-2-(non-1-en-3-yn-2-yl)benzene (1g):** Pale yellow oil, isolated yield 46%.  $^1\text{H}$  NMR (400 MHz,  $\text{CDCl}_3$ )  $\delta$  7.29–7.26 (m, 1H), 7.23–7.17 (m, 3H), 5.70 (s, 1H), 5.40 (s, 1H),

2.46-2.45 (m, 3H), 2.37-2.32 (m, 2H), 1.59 – 1.53 (m, 2H), 1.42 – 1.31 (m, 4H), 0.95 – 0.90 (m, 3H). <sup>13</sup>C NMR (100 MHz, CDCl<sub>3</sub>) δ 140.0, 135.4, 132.2, 130.26, 128.6, 127.6, 125.8, 123.8, 91.9, 80.6, 31.1, 28.3, 22.2, 20.2, 19.4, 14.0. MS (ESI): 213.2 [M+H]<sup>+</sup>.

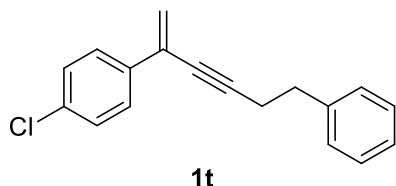

**1-chloro-4-(6-phenylhex-1-en-3-yn-2-yl)benzene**

**(1t):** Pale yellow oil, isolated yield 51%. <sup>1</sup>H NMR (400 MHz, CDCl<sub>3</sub>) δ 7.36 (d, *J* = 8.8 Hz, 2H), 7.28 – 7.21 (m, 2H), 7.21 – 7.08 (m, 5H), 5.72 (d, *J* = 1.2 Hz, 1H), 5.48 (d, *J* = 0.8 Hz, 1H), 2.84 (t, *J* = 7.6 Hz, 2H), 2.64 (t, *J* = 7.6 Hz, 2H). <sup>13</sup>C NMR (100 MHz, CDCl<sub>3</sub>) δ 140.5, 136.0, 133.9, 129.7, 128.5, 128.4, 128.3, 127.4, 126.4, 119.8, 91.4, 80.1, 34.9, 21.5. MS (ESI): 267.1 [M+H]<sup>+</sup>.

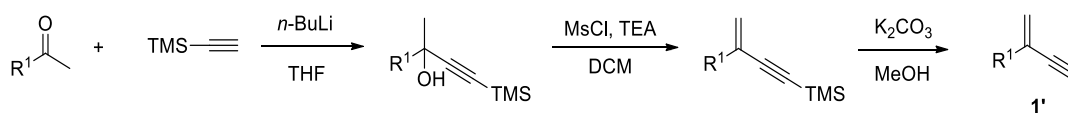

**Procedure B:** Under nitrogen atmosphere, *n*-BuLi (2.0 M in hexane, 5 mmol, 2.5 mL) was added dropwise to a solution of trimethylsilylacetylene (5 mmol) in anhydrous THF (20 mL) at -78 °C. After addition, the resulting solution was stirred at room temperature for one hour. Then, cooled to -78 °C again, ketone (5 mmol) in THF (10 mL) was added dropwise. The reaction mixture was allowed to warm to room temperature and was monitored by TLC for completion. Once completion the reaction was quenched with saturated aqueous NH<sub>4</sub>Cl and extracted with EtOAc three times. The combined organic layer was dried over Na<sub>2</sub>SO<sub>4</sub> and concentrated under reduced pressure to afford the crude propargyl alcohol.

The resulting propargyl alcohol was dissolved in DCM (30 mL), and the mixture was cooled to 0 °C. TEA (25 mmol, 5 equiv) was added to this solution and methylsulfonyl chloride (12.5 mmol, 2.5 equiv) sequentially. After one hour the reaction was monitored by TLC for completion. Once completion the reaction was quenched with saturated aqueous NH<sub>4</sub>Cl. The aqueous layer was extracted with DCM and the combined organic layers were washed with brine, dried over Na<sub>2</sub>SO<sub>4</sub>, filtered,

and concentrated under reduced pressure.

The crude material was directly treated with anhydrous  $K_2CO_3$  (15 mmol, 3 equiv) in MeOH (20 mL) and stirred at room temperature for two hours. Then, MeOH was removed and water was added to the remaining residue. The aqueous layer was extracted with EtOAc and the combined organic layers were washed with brine, dried over  $Na_2SO_4$ , filtered, and concentrated under reduced pressure. The crude residue was purified by flash chromatography to yield the 1,3-enyne **1'**.

The analytical data of the new products are summarized below.

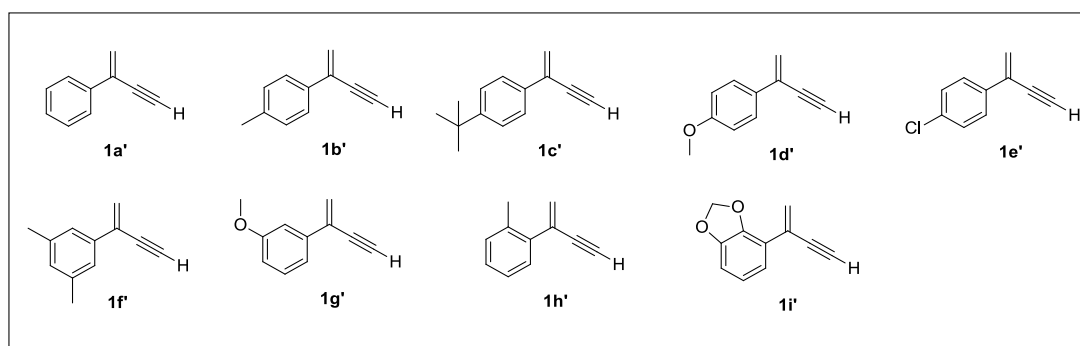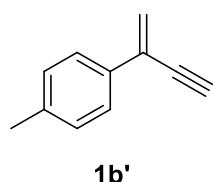

**1-(but-1-en-3-yn-2-yl)-4-methylbenzene (1b')**: Pale yellow oil, isolated yield 59%.  $^1H$  NMR (400 MHz,  $CDCl_3$ )  $\delta$  7.57 (d,  $J = 8.0$  Hz, 2H), 7.21 – 7.14 (m, 2H), 5.96 (s, 1H), 5.72 (s, 1H), 3.11 (t,  $J = 0.6$  Hz, 1H), 2.37 (s, 3H).  $^{13}C$  NMR (100 MHz,  $CDCl_3$ )  $\delta$  138.4, 133.9, 129.5, 129.1, 125.9, 121.3, 82.9, 78.4, 21.2. MS (ESI): 143.1  $[M+H]^+$ .

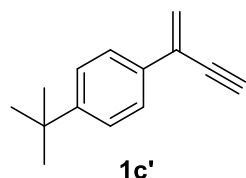

**1-(but-1-en-3-yn-2-yl)-4-(tert-butyl)benzene (1c')**: Pale yellow oil, isolated yield 57%.  $^1H$  NMR (400 MHz,  $CDCl_3$ )  $\delta$  7.62 (d,  $J = 8.8$  Hz, 2H), 7.41 (d,  $J = 8.8$  Hz, 2H), 5.99 – 5.96 (m, 1H), 5.75 – 5.71 (m, 1H), 3.11 (t,  $J = 0.6$  Hz, 1H), 1.35 (s, 9H).  $^{13}C$  NMR (100 MHz,  $CDCl_3$ )  $\delta$  151.6, 133.9, 129.5, 125.7, 125.3, 121.4, 82.9, 78.4, 34.6, 31.3. MS (ESI): 185.1  $[M+H]^+$ .

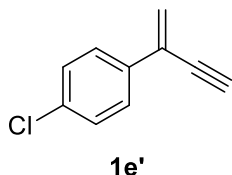

**1-(but-1-en-3-yn-2-yl)-4-chlorobenzene (1e')**: Pale yellow oil, isolated yield 55%.  $^1\text{H}$  NMR (400 MHz,  $\text{CDCl}_3$ )  $\delta$  7.59 (d,  $J = 8.8$  Hz, 2H), 7.33 (d,  $J = 8.8$  Hz, 2H), 5.97 (s, 1H), 5.77 (s, 1H), 3.13 (t,  $J = 0.6$  Hz, 1H).  $^{13}\text{C}$  NMR (100 MHz,  $\text{CDCl}_3$ )  $\delta$  135.1, 134.4, 128.7, 128.5, 127.3, 122.5, 82.3, 79.1. MS (ESI): 163.0  $[\text{M}+\text{H}]^+$ .

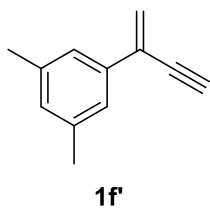

**1-(but-1-en-3-yn-2-yl)-3,5-dimethylbenzene (1f')**: Pale yellow oil, isolated yield 54%.  $^1\text{H}$  NMR (400 MHz,  $\text{CDCl}_3$ )  $\delta$  7.34 – 7.30 (m, 2H), 7.02 – 6.98 (m, 1H), 6.00 (s, 1H), 5.76 (s, 1H), 3.14 (t,  $J = 0.4$  Hz, 1H), 2.38 (d,  $J = 0.8$  Hz, 6H).  $^{13}\text{C}$  NMR (100 MHz,  $\text{CDCl}_3$ )  $\delta$  137.9, 136.6, 130.1, 129.9, 123.8, 122.0, 83.0, 78.4, 21.3. MS (ESI): 157.1  $[\text{M}+\text{H}]^+$ .

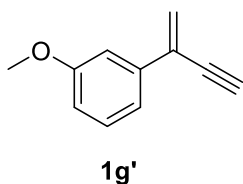

**1-(but-1-en-3-yn-2-yl)-3-methoxybenzene (1g')**: Pale yellow oil, isolated yield 58%.  $^1\text{H}$  NMR (400 MHz,  $\text{CDCl}_3$ )  $\delta$  7.37 – 7.17 (m, 3H), 6.93 – 6.86 (m, 1H), 6.02 (s, 1H), 5.79 (s, 1H), 3.86 (s, 3H), 3.14 (t,  $J = 0.6$  Hz, 1H).  $^{13}\text{C}$  NMR (100 MHz,  $\text{CDCl}_3$ )  $\delta$  159.6, 138.1, 129.6, 129.4, 122.5, 118.4, 113.9, 111.9, 82.7, 78.6, 55.3. MS (ESI): 159.1  $[\text{M}+\text{H}]^+$ .

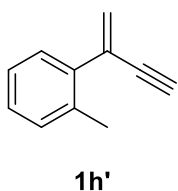

**1-(but-1-en-3-yn-2-yl)-2-methylbenzene (1h')**: Pale yellow oil, isolated yield 54%.  $^1\text{H}$  NMR (400 MHz,  $\text{CDCl}_3$ )  $\delta$  7.25 – 6.92 (m, 4H), 5.75 (dd,  $J = 1.6, 0.8$  Hz, 1H), 5.42 (dd,  $J = 1.6, 0.8$  Hz, 1H), 2.93 (t,  $J = 0.6$  Hz, 1H), 2.31 (s, 3H).  $^{13}\text{C}$  NMR (100 MHz,  $\text{CDCl}_3$ )  $\delta$  138.7, 135.5, 130.9, 130.4, 128.7, 128.0, 126.9, 125.9, 83.4, 78.5, 20.1. MS (ESI): 143.1  $[\text{M}+\text{H}]^+$ .

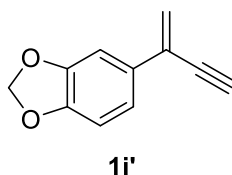

**5-(but-1-en-3-yn-2-yl)benzo[d][1,3]dioxole (1i')**: Pale yellow oil, isolated yield 53%.  $^1\text{H}$  NMR (400 MHz,  $\text{CDCl}_3$ )  $\delta$  7.20 (dd,  $J = 8.2, 1.8$  Hz, 1H), 7.14 (dd,  $J = 1.8, 0.6$  Hz, 1H), 6.80 (dd,  $J = 8.4, 0.4$  Hz, 1H), 5.97 (s, 2H), 5.85 (s, 1H), 5.67 (s, 1H), 3.11 (s, 1H).

$^{13}\text{C}$  NMR (100 MHz,  $\text{CDCl}_3$ )  $\delta$  147.9, 147.8, 131.0, 129.1, 120.7, 120.3, 108.0, 106.1, 101.2, 82.8, 78.5. MS (ESI): 173.1  $[\text{M}+\text{H}]^+$ .

#### 4. General procedure for 1,4-sulfonylarylation of 1,3-enynes

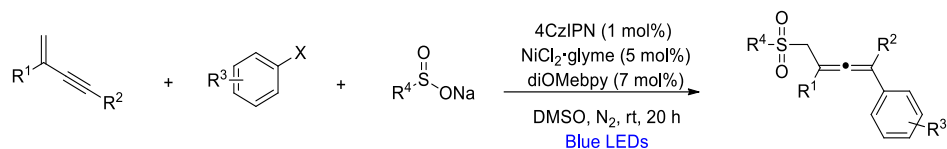

**General procedure :** A dry reaction tube equipped with a Teflon-coated magnetic stir bar was charged with 4CzIPN (1.6 mg, 0.002 mmol, 1 mol%), NiCl<sub>2</sub>·glyme (2.2 mg, 0.01 mmol, 5 mol%), diOMebpy (3.0 mg, 0.014 mmol, 7 mol%), aryl halide (0.2 mmol, 1 equiv., if solid), sodium sulfinat (0.24 mmol, 1.2 equiv.) and 1,3-enyne (0.4 mmol, 2 equiv., if solid). It was capped with a rubber septum, evacuated and backfilled with argon. Then, degassed anhydrous DMSO (2.0 mL), aryl halide (0.2 mmol, 1 equiv., if liquid) and 1,3-enyne (0.4 mmol, 2 equiv., if liquid) were added via syringe. The reaction mixture was stirred at room temperature under 30 W blue LEDs irradiation for 20 hours. After the reaction completion, the reaction mixture was diluted with EtOAc, then washed with brine, dried over Na<sub>2</sub>SO<sub>4</sub>, filtered, and concentrated under reduced pressure. The residue was purified by column chromatography on silica gel (hexane/EtOAc) to afford the corresponding products.

The analytical data of the products are summarized below. **4m** is known compound in the references.<sup>[3]</sup>

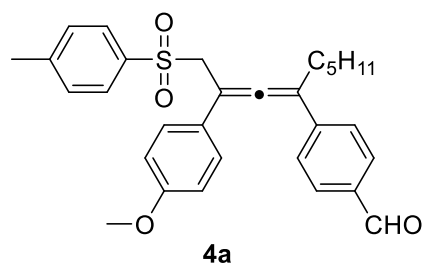

**4-(2-(4-methoxyphenyl)-1-tosylnona-2,3-dien-4-yl)benzaldehyde (4a):** Pale yellow oil, 70.3 mg, isolated yield 72%. <sup>1</sup>H NMR (400 MHz, CDCl<sub>3</sub>) δ 9.98 (s, 1H), 7.79 (d, *J* = 8.8 Hz, 2H), 7.69 (d, *J* = 8.0 Hz, 2H), 7.47 (d, *J* = 8.4 Hz, 2H), 7.26 (d, *J* =

8.8 Hz, 2H), 7.18 (d, *J* = 8.0 Hz, 2H), 6.81 (d, *J* = 8.8 Hz, 2H), 4.36 – 4.26 (m, 2H), 3.79 (s, 3H), 2.49 – 2.39 (m, 2H), 2.36 (s, 3H), 1.53 – 1.44 (m, 2H), 1.35 – 1.26 (m, 4H), 0.85 (t, *J* = 6.8 Hz, 3H). <sup>13</sup>C NMR (100 MHz, CDCl<sub>3</sub>) δ 210.3, 191.7, 159.2, 144.6, 142.1, 136.1, 135.2, 129.9, 129.6, 128.4, 127.4, 126.9, 125.8, 114.1, 109.8, 99.3, 58.2,

55.3, 31.7, 30.3, 27.6, 22.4, 21.6, 14.0. HRMS (ESI):  $m/z$  calcd. for  $C_{33}H_{33}O_4S^+([M+H]^+) = 489.2094$ , found = 489.2095.

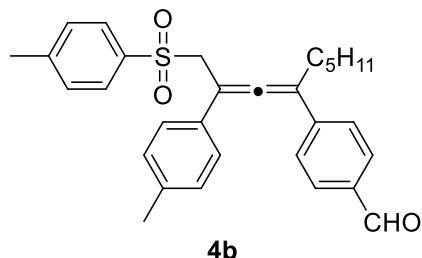

**4b**

**4-(2-(*p*-tolyl)-1-tosylnona-2,3-dien-4-yl)benzaldehyde (4b):** Light yellow solid, 70.8 mg, isolated yield 75%.  $^1H$  NMR (400 MHz,  $CDCl_3$ )  $\delta$  9.98 (s, 1H), 7.79 (d,  $J = 8.4$  Hz, 2H), 7.69 (d,  $J = 8.4$  Hz, 2H), 7.48 (d,  $J = 8.4$  Hz, 2H), 7.22 (d,  $J =$

8.4 Hz, 2H), 7.17 (d,  $J = 8.4$  Hz, 2H), 7.08 (d,  $J = 8.0$  Hz, 2H), 4.40 – 4.25 (m, 2H), 2.52 – 2.38 (m, 2H), 2.35 (s, 3H), 2.32 (s, 3H), 1.56 – 1.43 (m, 2H), 1.35 – 1.26 (m, 4H), 0.85 (t,  $J = 7.2$  Hz, 3H).  $^{13}C$  NMR (100 MHz,  $CDCl_3$ )  $\delta$  210.5, 191.6, 144.6, 142.0, 137.6, 136.1, 135.2, 130.7, 129.9, 129.6, 129.3, 128.4, 126.9, 126.1, 109.9, 99.6, 58.1, 31.7, 30.2, 27.5, 22.4, 21.6, 21.1, 14.0. HRMS (ESI):  $m/z$  calcd. for  $C_{30}H_{32}O_3SNa^+([M+Na]^+) = 495.1964$ , found = 495.1962.

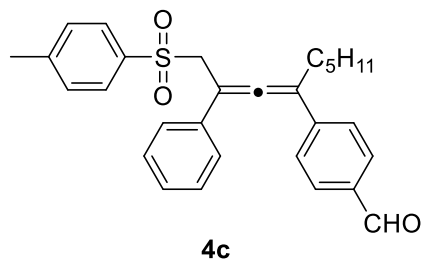

**4c**

**4-(2-phenyl-1-tosylnona-2,3-dien-4-yl)benzaldehyde (4c):** Pale yellow oil, 64.1 mg, isolated yield 70%.  $^1H$  NMR (400 MHz,  $CDCl_3$ )  $\delta$  9.91 (s, 1H), 7.74 (d,  $J = 8.8$  Hz, 2H), 7.63 (d,  $J = 8.4$  Hz, 2H), 7.44 (d,  $J = 8.4$  Hz, 2H), 7.29 – 7.24

(m, 2H), 7.23 – 7.13 (m, 3H), 7.10 (d,  $J = 7.6$  Hz, 2H), 4.34 – 4.23 (m, 2H), 2.48 – 2.33 (m, 2H), 2.28 (s, 3H), 1.52 – 1.37 (m, 2H), 1.30 – 1.20 (m, 4H), 0.78 (t,  $J = 7.8$  Hz, 3H).  $^{13}C$  NMR (100 MHz,  $CDCl_3$ )  $\delta$  210.8, 191.6, 144.6, 141.7, 136.0, 135.2, 133.7, 129.9, 129.6, 128.6, 128.3, 127.5, 126.9, 126.1, 110.0, 99.6, 58.0, 31.7, 30.2, 27.5, 22.4, 21.5, 14.0. HRMS (ESI):  $m/z$  calcd. for  $C_{29}H_{31}O_3S^+([M+H]^+) = 459.1988$ , found = 459.1987.

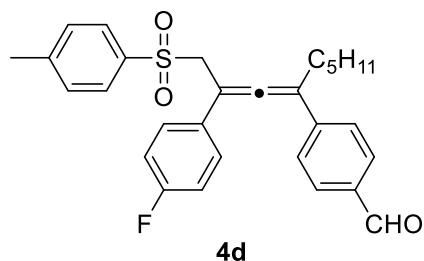

**4-(2-(4-fluorophenyl)-1-tosylnona-2,3-dien-4-yl)benzaldehyde (4d):** Pale yellow oil, 72.0 mg, isolated yield 76%.  $^1\text{H}$  NMR (400 MHz,  $\text{CDCl}_3$ )  $\delta$  9.91 (s, 1H), 7.73 (d,  $J = 8.4$  Hz, 2H), 7.62 (d,  $J = 8.4$  Hz, 2H), 7.41 (d,  $J = 8.0$  Hz, 2H), 7.22 (dd,  $J =$

8.8, 5.2 Hz, 2H), 7.12 (d,  $J = 7.6$  Hz, 2H), 6.88 (t,  $J = 8.8$  Hz, 2H), 4.29 – 4.18 (m, 2H), 2.47 – 2.33 (m, 2H), 2.29 (s, 3H), 1.49 – 1.36 (m, 2H), 1.27 – 1.19 (m, 4H), 0.78 (t,  $J = 6.8$  Hz, 3H).  $^{13}\text{C}$  NMR (100 MHz,  $\text{CDCl}_3$ )  $\delta$  210.6 (d,  $J = 2.0$  Hz), 191.6, 162.2 (d,  $J = 247.0$  Hz), 144.8, 141.6, 136.0, 135.3, 129.9, 129.8 (d,  $J = 3.0$  Hz), 129.7, 128.4, 127.9 (d,  $J = 8.0$  Hz), 127.0, 115.6 (d,  $J = 21.0$  Hz), 110.1, 98.9, 58.3, 31.6, 30.2, 27.5, 22.4, 21.6, 14.0. HRMS (ESI):  $m/z$  calcd. for  $\text{C}_{29}\text{H}_{30}\text{FO}_3\text{S}^+([\text{M}+\text{H}]^+) = 477.1894$ , found = 477.1896.

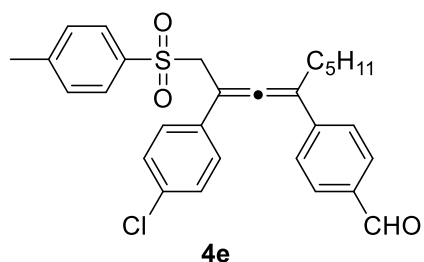

**4-(2-(4-chlorophenyl)-1-tosylnona-2,3-dien-4-yl)benzaldehyde (4e):** Pale yellow oil, 73.8 mg, isolated yield 75%.  $^1\text{H}$  NMR (400 MHz,  $\text{CDCl}_3$ )  $\delta$  9.92 (s, 1H), 7.74 (d,  $J = 8.4$  Hz, 2H), 7.62 (d,  $J = 8.0$  Hz, 2H), 7.41 (d,  $J = 8.4$  Hz, 2H), 7.21 – 7.08

(m, 6H), 4.30 – 4.16 (m, 2H), 2.47 – 2.32 (m, 2H), 2.30 (s, 3H), 1.48 – 1.35 (m, 2H), 1.27 – 1.21 (m, 4H), 0.68 (t,  $J = 6.8$  Hz, 3H).  $^{13}\text{C}$  NMR (100 MHz,  $\text{CDCl}_3$ )  $\delta$  210.8, 191.6, 144.9, 141.4, 136.0, 135.4, 133.50, 132.3, 130.0, 129.7, 128.8, 128.4, 127.5, 127.0, 110.4, 99.0, 58.1, 31.7, 30.2, 27.5, 22.4, 21.6, 14.0. HRMS (ESI):  $m/z$  calcd. for  $\text{C}_{29}\text{H}_{29}\text{ClO}_3\text{SNa}^+([\text{M}+\text{Na}]^+) = 515.1418$ , found = 515.1414.



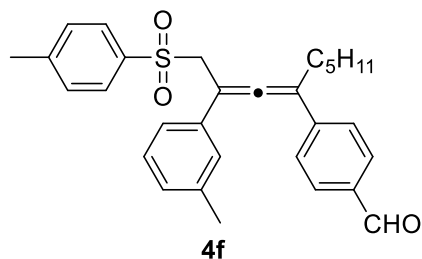

**4-(2-(*m*-tolyl)-1-tosylnona-2,3-dien-4-yl)benzaldehyde (4f):** Pale yellow oil, 61.4 mg, isolated yield 65%.  $^1\text{H}$  NMR (400 MHz,  $\text{CDCl}_3$ )  $\delta$  9.99 (s, 1H), 7.81 (d,  $J = 8.4$  Hz, 2H), 7.69 (d,  $J = 8.4$  Hz, 2H), 7.52 (d,  $J = 8.4$  Hz, 2H), 7.19 – 7.10

(m, 4H), 7.05 – 6.99 (m, 2H), 4.40 – 4.27 (m, 2H), 2.55 – 2.39 (m, 2H), 2.35 (s, 3H), 2.26 (s, 3H), 1.58 – 1.47 (m, 2H), 1.39 – 1.24 (m, 4H), 0.86 (t,  $J = 7.2$  Hz, 3H).  $^{13}\text{C}$  NMR (100 MHz,  $\text{CDCl}_3$ )  $\delta$  210.8, 191.6, 144.5, 141.9, 138.1, 136.1, 135.2, 133.6, 129.9, 129.5, 128.5, 128.4, 128.4, 127.0, 126.7, 123.4, 109.8, 99.7, 58.1, 31.7, 30.2, 27.5, 22.4, 21.5, 21.4, 14.0. HRMS (ESI):  $m/z$  calcd. for  $\text{C}_{30}\text{H}_{33}\text{O}_3\text{S}^+([\text{M}+\text{H}]^+) = 473.2145$ , found = 473.2141.

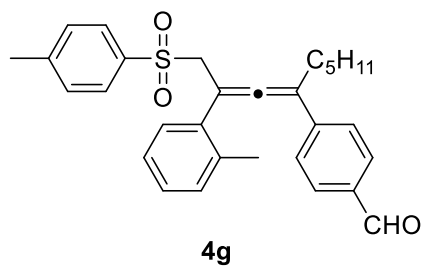

**4-(2-(*o*-tolyl)-1-tosylnona-2,3-dien-4-yl)benzaldehyde (4g):** Pale yellow oil, 65.4 mg, isolated yield 69%.  $^1\text{H}$  NMR (400 MHz,  $\text{CDCl}_3$ )  $\delta$  10.02 (s, 1H), 7.86 (d,  $J = 8.8$  Hz, 2H), 7.67 (d,  $J = 8.4$  Hz, 2H), 7.63 (d,  $J = 8.4$  Hz, 2H), 7.20 (d,  $J = 8.0$  Hz, 2H), 7.17 – 7.05 (m, 4H), 4.36 – 4.22 (m, 2H), 2.51 – 2.43 (m, 2H), 2.40 (s, 3H), 2.26 (s, 3H), 1.59 – 1.47 (m, 2H), 1.39 – 1.26 (m, 4H), 0.88 (t,  $J = 6.8$  Hz, 3H).

$^{13}\text{C}$  NMR (100 MHz,  $\text{CDCl}_3$ )  $\delta$  209.1, 191.7, 144.5, 142.1, 136.4, 135.6, 135.1, 134.6, 130.6, 129.8, 129.6, 128.4, 128.0, 127.6, 127.2, 125.9, 107.3, 98.0, 60.8, 31.6, 30.2, 27.5, 22.4, 21.5, 20.7, 14.0. HRMS (ESI):  $m/z$  calcd. for  $\text{C}_{30}\text{H}_{33}\text{O}_3\text{S}^+([\text{M}+\text{H}]^+) = 473.2145$ , found = 473.2144.

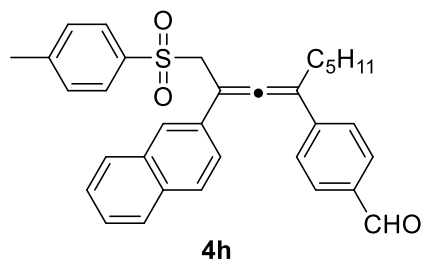

**4-(2-(naphthalen-2-yl)-1-tosylnona-2,3-dien-4-yl)benzaldehyde (4h):** Pale yellow oil, 54.9 mg, isolated yield 54%.  $^1\text{H}$  NMR (400 MHz,  $\text{CDCl}_3$ )  $\delta$  10.00 (s, 1H), 7.83 (d,  $J = 8.8$  Hz, 2H), 7.78 – 7.73 (m, 1H), 7.72 – 7.65 (m, 4H), 7.60 (d,  $J = 1.6$  Hz,

1H), 7.56 (d,  $J = 8.0$  Hz, 2H), 7.48 – 7.38 (m, 3H), 7.08 (d,  $J = 8.0$  Hz, 2H), 4.53 – 4.39 (m, 2H), 2.59 – 2.43 (m, 2H), 2.20 (s, 3H), 1.59 – 1.50 (m, 2H), 1.42 – 1.24 (m, 4H), 0.85 (t,  $J = 6.8$  Hz, 3H).  $^{13}\text{C}$  NMR (100 MHz,  $\text{CDCl}_3$ )  $\delta$  211.4, 191.6, 144.8, 141.8, 136.1, 135.3, 133.3, 132.6, 130.9, 130.0, 129.6, 128.4, 128.3, 128.1, 127.5, 127.0, 126.3, 126.2, 124.0, 124.4, 110.3, 100.0, 58.2, 31.7, 30.3, 27.6, 22.4, 21.4, 14.0. HRMS (ESI):  $m/z$  calcd. for  $\text{C}_{33}\text{H}_{33}\text{O}_3\text{S}^+([\text{M}+\text{H}]^+) = 509.2145$ , found = 509.2141.

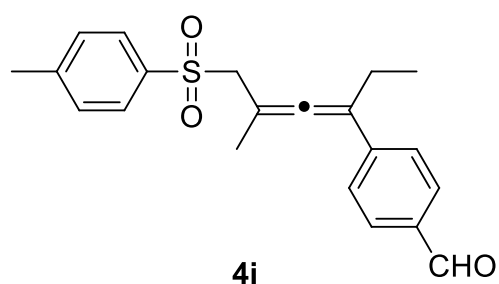

**4-(5-methyl-6-tosylhexa-3,4-dien-3-yl)benzaldehyde (4i):** Pale yellow oil, 50.7 mg, isolated yield 72%.  $^1\text{H}$  NMR (400 MHz,  $\text{CDCl}_3$ )  $\delta$  9.96 (s, 1H), 7.78 (d,  $J = 8.4$  Hz, 2H), 7.74 (d,  $J = 8.4$  Hz, 2H), 7.32 (d,  $J = 8.4$  Hz, 2H), 7.28 (d,  $J = 8.0$ , 2H), 3.91 – 3.81 (m, 2H),

2.40 (s, 3H), 2.32 (q,  $J = 7.2$  Hz, 2H), 1.99 (s, 3H), 0.99 (t,  $J = 7.2$  Hz, 3H).  $^{13}\text{C}$  NMR (100 MHz,  $\text{CDCl}_3$ )  $\delta$  207.4, 191.7, 144.8, 142.8, 136.0, 134.8, 129.8, 129.7, 128.2, 126.7, 107.8, 93.9, 61.4, 23.1, 21.6, 18.9, 12.4. HRMS (ESI):  $m/z$  calcd. for  $\text{C}_{21}\text{H}_{23}\text{O}_3\text{S}^+([\text{M}+\text{H}]^+) = 355.1362$ , found = 355.1364.

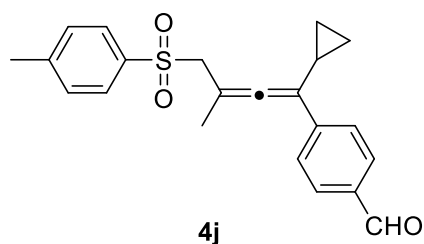

**4-(1-cyclopropyl-3-methyl-4-tosylbuta-1,2-dien-1-yl)benzaldehyde (4j):** Pale yellow oil, 53.4 mg, isolated yield 73%.  $^1\text{H}$  NMR (400 MHz,  $\text{CDCl}_3$ )  $\delta$  9.97 (s, 1H), 7.79 – 7.72 (m, 4H), 7.49 (d,  $J = 8.4$  Hz, 2H), 7.28 (d,  $J = 8.0$  Hz, 2H), 3.88 – 3.77 (m,

2H), 2.40 (s, 3H), 1.95 (s, 3H), 1.51 – 1.43 (m, 1H), 0.91 – 0.76 (m, 2H), 0.47 – 0.36 (m, 2H).  $^{13}\text{C}$  NMR (100 MHz,  $\text{CDCl}_3$ )  $\delta$  206.8, 191.7, 144.8, 143.2, 136.0, 134.9, 129.9, 129.6, 128.1, 127.0, 109.5, 94.4, 61.2, 21.6, 18.9, 11.0, 7.3, 7.0. HRMS (ESI):  $m/z$  calcd. for  $\text{C}_{22}\text{H}_{23}\text{O}_3\text{S}^+([\text{M}+\text{H}]^+) = 367.1362$ , found = 367.1360.

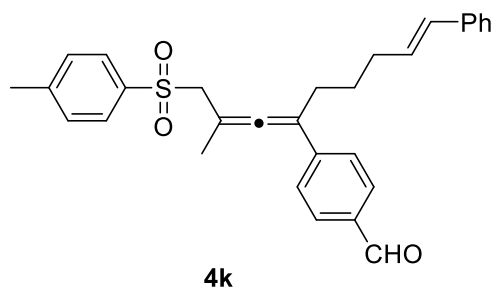

**(E)-4-(2-methyl-9-phenyl-1-tosylnona-2,3,8-trien-4-yl)benzaldehyde (4k):** Pale yellow oil, 49.8 mg, isolated yield 53%. <sup>1</sup>H NMR (400 MHz, CDCl<sub>3</sub>) δ 9.90 (s, 1H), 7.71 – 7.67 (m, 4H), 7.28 – 7.23 (m, 5H), 7.23 –

7.20 (m, 2H), 7.18 – 7.12 (m, 2H), 6.34 – 6.29 (m, 1H), 6.15 – 6.08 (m, 1H), 3.83 – 3.75 (m, 2H), 2.33 (s, 3H), 2.29 – 2.22 (m, 2H), 2.19 – 2.14 (m, 2H), 1.93 (s, 3H), 1.52 – 1.51 (m, 2H). <sup>13</sup>C NMR (100 MHz, CDCl<sub>3</sub>) δ 207.6, 191.7, 144.8, 142.7, 137.5, 136.0, 134.9, 130.5, 129.9, 129.8, 129.7, 128.5, 128.2, 127.0, 126.8, 125.9, 105.9, 93.3, 61.3, 32.5, 29.4, 27.4, 21.6, 18.9. HRMS (ESI): m/z calcd. for C<sub>30</sub>H<sub>30</sub>O<sub>3</sub>SNa<sup>+</sup> ([M+Na]<sup>+</sup>) = 493.1808, found = 493.1804.

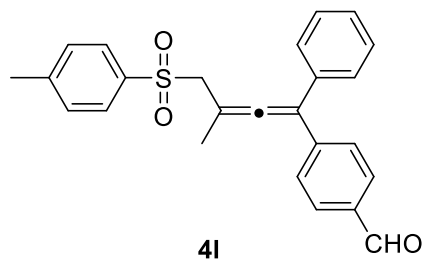

**4-(3-methyl-1-phenyl-4-tosylbuta-1,2-dien-1-yl)benzaldehyde (4l):** Pale yellow oil, 50.7 mg, isolated yield 63%. <sup>1</sup>H NMR (500 MHz, CDCl<sub>3</sub>) δ 10.00 (s, 1H), 7.78 (d, *J* = 6.8 Hz, 2H), 7.69 (d, *J* = 6.8 Hz, 2H), 7.36 – 7.27 (m, 5H), 7.16 – 7.09 (m,

4H), 3.98 – 3.90 (m, 2H), 2.33 (s, 3H), 2.07 (s, 3H). <sup>13</sup>C NMR (125 MHz, CDCl<sub>3</sub>) δ 208.3, 191.6, 144.6, 142.8, 135.4, 135.3, 135.2, 129.7, 129.6, 129.0, 128.6, 128.5, 128.1, 127.8, 109.7, 93.7, 61.1, 21.6, 19.1. HRMS (ESI): m/z calcd. for C<sub>25</sub>H<sub>23</sub>O<sub>3</sub>S<sup>+</sup> ([M+H]<sup>+</sup>) = 403.1362, found = 403.1363.

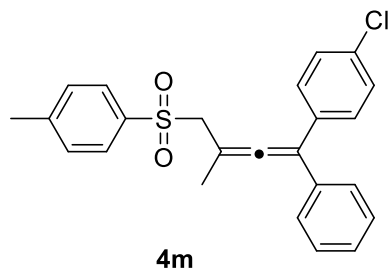

**1-chloro-4-(3-methyl-1-phenyl-4-tosylbuta-1,2-dien-1-yl)benzene (4m):** Pale yellow oil, 67.7 mg, isolated yield 83%. <sup>1</sup>H NMR (400 MHz, CDCl<sub>3</sub>) δ 7.67 (d, *J* = 8.0 Hz, 2H), 7.32 – 7.26 (m, 3H), 7.23 (d, *J* = 8.4 Hz, 2H), 7.14 – 7.07 (m, 4H), 7.04 (d, *J* = 8.8 Hz,

2H), 3.98 – 3.86 (m, 2H), 2.35 (s, 3H), 2.05 (s, 3H). <sup>13</sup>C NMR (100 MHz, CDCl<sub>3</sub>) δ 207.4, 144.6, 135.8, 135.4, 134.7, 133.2, 129.9, 129.7, 128.5, 128.4, 128.4, 128.1, 127.7,

109.3, 93.2, 61.4, 21.6, 19.2. HRMS (ESI):  $m/z$  calcd. for  $C_{24}H_{21}ClO_2SNa^+([M+Na]^+)$  = 431.0843, found = 431.0841.

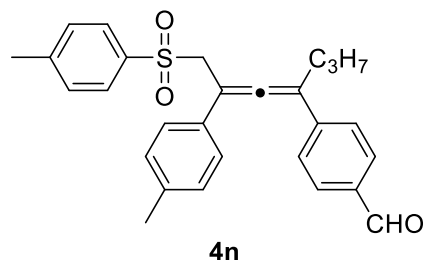

**4-(2-(*p*-tolyl)-1-tosylhepta-2,3-dien-4-yl)benzaldehyde (4n):** Pale yellow oil, 73.7 mg, isolated yield 83%.  $^1H$  NMR (400 MHz,  $CDCl_3$ )  $\delta$  9.98 (s, 1H), 7.79 (d,  $J = 8.4$  Hz, 2H), 7.69 (d,  $J = 8.4$  Hz, 2H), 7.48 (d,  $J = 8.4$  Hz, 2H), 7.23

(d,  $J = 8.4$  Hz, 2H), 7.18 (d,  $J = 7.6$  Hz, 2H), 7.08 (d,  $J = 8.0$  Hz, 2H), 4.42 – 4.28 (m, 2H), 2.50 – 2.38 (m, 2H), 2.35 (s, 3H), 2.32 (s, 3H), 1.60 – 1.43 (m, 2H), 0.95 (t,  $J = 7.6$  Hz, 3H).  $^{13}C$  NMR (100 MHz,  $CDCl_3$ )  $\delta$  210.6, 191.6, 144.6, 141.9, 137.6, 136.1, 135.2, 130.6, 129.9, 129.6, 129.3, 128.4, 126.9, 126.1, 109.7, 99.6, 58.0, 32.3, 21.6, 21.1, 21.1, 14.0. HRMS (ESI):  $m/z$  calcd. for  $C_{28}H_{28}O_3SNa^+([M+Na]^+)$  = 467.1651, found = 467.1648.

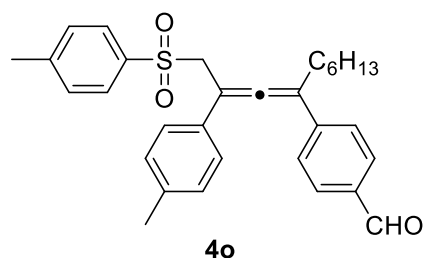

**4-(2-(*p*-tolyl)-1-tosyldeca-2,3-dien-4-yl)benzaldehyde (4o):** Pale yellow oil, 69.0 mg, isolated yield 71%.  $^1H$  NMR (400 MHz,  $CDCl_3$ )  $\delta$  9.98 (s, 1H), 7.79 (d,  $J = 8.4$  Hz, 2H), 7.69 (d,  $J = 8.4$  Hz, 2H), 7.48 (d,  $J = 8.0$  Hz, 2H), 7.22 (d,  $J =$

8.4 Hz, 2H), 7.17 (d,  $J = 7.6$  Hz, 2H), 7.08 (d,  $J = 8.0$  Hz, 2H), 4.39 – 4.26 (m, 2H), 2.54 – 2.39 (m, 2H), 2.35 (s, 3H), 2.32 (s, 3H), 1.55 – 1.43 (m, 2H), 1.38 – 1.19 (m, 6H), 0.85 (t,  $J = 7.2$  Hz, 3H).  $^{13}C$  NMR (100 MHz,  $CDCl_3$ )  $\delta$  210.5, 191.6, 144.6, 142.0, 137.6, 136.1, 135.2, 130.7, 129.9, 129.6, 129.3, 128.4, 126.9, 126.1, 109.9, 99.6, 58.1, 31.6, 30.3, 29.2, 27.8, 22.6, 21.6, 21.1, 14.0. HRMS (ESI):  $m/z$  calcd. for  $C_{31}H_{34}O_3SNa^+([M+Na]^+)$  = 509.2121, found = 509.2119.

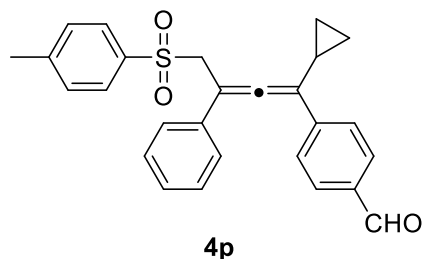

**4-(1-cyclopropyl-3-phenyl-4-tosylbuta-1,2-dien-1-yl)benzaldehyde (4p):** Pale yellow oil, 51.4 mg, isolated yield 60%.  $^1\text{H}$  NMR (400 MHz,  $\text{CDCl}_3$ )  $\delta$  9.98 (s, 1H), 7.80 (d,  $J = 8.4$  Hz, 2H), 7.71 – 7.61 (m, 4H), 7.27 – 7.17 (m, 5H), 7.14 (d,  $J = 8.0$  Hz, 2H), 4.38 – 4.22 (m, 2H), 2.32 (s, 3H), 1.67 – 1.61 (m, 1H), 0.96 – 0.85 (m, 2H), 0.66 – 0.58 (m, 1H), 0.57 – 0.50 (m, 1H).  $^{13}\text{C}$  NMR (100 MHz,  $\text{CDCl}_3$ )  $\delta$  210.2, 191.7, 144.7, 142.3, 136.1, 135.4, 133.5, 129.8, 129.7, 128.7, 128.3, 127.7, 127.2, 126.1, 113.3, 100.9, 58.0, 21.6, 11.4, 7.3. HRMS (ESI):  $m/z$  calcd. for  $\text{C}_{27}\text{H}_{25}\text{O}_3\text{S}^+([\text{M}+\text{H}]^+) = 429.1519$ , found = 429.1520.

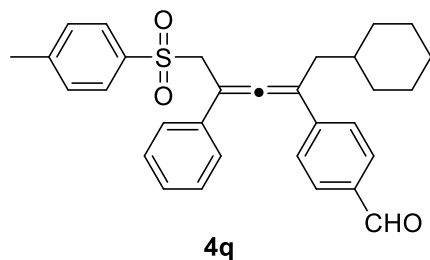

**4-(1-cyclohexyl-4-phenyl-5-tosylpenta-2,3-dien-2-yl)benzaldehyde (4q):** Pale yellow oil, 74.5 mg, isolated yield 77%.  $^1\text{H}$  NMR (400 MHz,  $\text{CDCl}_3$ )  $\delta$  9.90 (s, 1H), 7.73 (d,  $J = 8.4$  Hz, 2H), 7.60 (d,  $J = 8.4$  Hz, 2H), 7.42 (d,  $J = 8.4$  Hz, 2H), 7.26 – 7.21 (m, 2H), 7.21 – 7.11 (m, 3H), 7.09 (d,  $J = 8.4$  Hz, 2H), 4.33 – 4.18 (m, 2H), 2.34 – 2.13 (m, 5H), 1.69 – 1.49 (m, 5H), 1.42 – 1.30 (m, 1H), 1.13 – 0.98 (m, 3H), 0.89 – 0.73 (m, 2H).  $^{13}\text{C}$  NMR (100 MHz,  $\text{CDCl}_3$ )  $\delta$  211.3, 191.6, 144.6, 141.8, 135.9, 135.2, 133.7, 129.9, 129.6, 128.5, 128.4, 127.5, 127.1, 126.2, 108.1, 98.7, 58.2, 38.1, 36.1, 33.3, 33.2, 26.2, 26.0, 21.5. HRMS (ESI):  $m/z$  calcd. for  $\text{C}_{31}\text{H}_{33}\text{O}_3\text{S}^+([\text{M}+\text{H}]^+) = 485.2145$ , found = 485.2141.

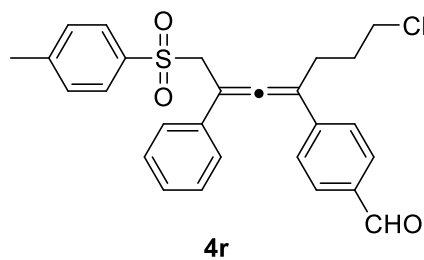

**4-(7-chloro-2-phenyl-1-tosylhepta-2,3-dien-4-yl)benzaldehyde (4r):** Pale yellow oil, 56.6 mg, isolated yield 61%.  $^1\text{H}$  NMR (400 MHz,  $\text{CDCl}_3$ )  $\delta$  9.92 (s, 1H), 7.75 (d,  $J = 8.4$  Hz, 2H), 7.64 (d,  $J = 8.4$  Hz, 2H), 7.47 (d,  $J = 8.4$  Hz, 2H), 7.25 – 7.14 (m, 5H), 7.12 (d,  $J = 8.0$  Hz, 2H), 4.26 (s, 2H), 3.52 (t,  $J = 6.0$  Hz, 2H), 2.71 – 2.56 (m,

2H), 2.29 (s, 3H), 2.05 – 1.87 (m, 2H).  $^{13}\text{C}$  NMR (100 MHz,  $\text{CDCl}_3$ )  $\delta$  210.5, 191.6, 144.8, 141.2, 136.1, 135.4, 133.5, 130.0, 129.7, 128.7, 128.3, 127.8, 126.9, 126.1, 108.9, 100.3, 57.9, 44.5, 30.4, 27.5, 21.6. HRMS (ESI):  $m/z$  calcd. for  $\text{C}_{27}\text{H}_{26}\text{ClO}_3\text{S}^+([\text{M}+\text{H}]^+)$  = 465.1286, found = 465.1287.

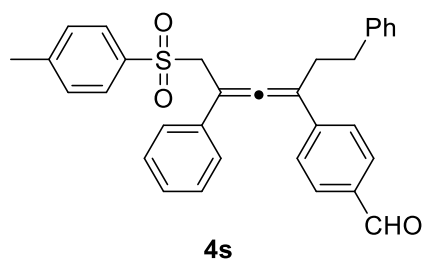

**4-(1,5-diphenyl-6-tosylhexa-3,4-dien-3-yl)benzaldehyde (4s):** Pale yellow oil, 53.1 mg, isolated yield 54%.  $^1\text{H}$  NMR (400 MHz,  $\text{CDCl}_3$ )  $\delta$  9.92 (s, 1H), 7.75 (d,  $J = 8.4$  Hz, 2H), 7.58 (d,  $J = 8.0$  Hz, 2H), 7.45 (d,  $J = 8.4$  Hz, 2H), 7.22 – 7.04

(m, 12H), 4.12 (d,  $J = 14.4$  Hz, 1H), 3.86 (d,  $J = 14.4$  Hz, 1H), 2.77 (s, 4H), 2.23 (s, 3H).  $^{13}\text{C}$  NMR (100 MHz,  $\text{CDCl}_3$ )  $\delta$  211.0, 191.6, 144.7, 141.4, 140.9, 136.1, 135.3, 133.5, 130.0, 129.6, 128.6, 128.5, 128.4, 128.3, 127.6, 127.0, 126.2, 126.2, 108.9, 100.1, 57.6, 33.6, 31.7, 21.5. HRMS (ESI):  $m/z$  calcd. for  $\text{C}_{32}\text{H}_{29}\text{O}_3\text{S}^+([\text{M}+\text{H}]^+)$  = 493.1832, found = 493.1835.

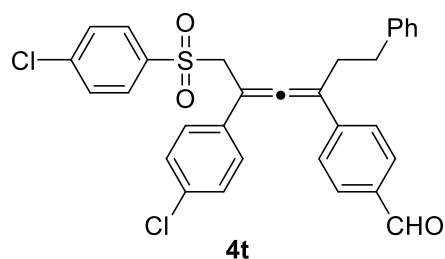

**4-(5-(4-chlorophenyl)-6-((4-chlorophenyl)sulfonyl)-1-phenylhexa-3,4-dien-3-yl)benzaldehyde (4t):** Pale yellow oil, 61.2 mg, isolated yield 56%.  $^1\text{H}$  NMR (400 MHz,  $\text{CDCl}_3$ )  $\delta$  9.76 (s, 1H), 7.59 (d,  $J = 8.4$  Hz, 2H), 7.41 (d,  $J = 8.4$  Hz, 2H), 7.20 (d,  $J = 8.4$  Hz, 2H), 7.07 (d,  $J = 8.8$  Hz, 2H), 7.04 – 6.92 (m, 5H), 6.85 (d,  $J = 8.4$  Hz, 2H), 6.79 (d,  $J = 8.8$  Hz, 2H), 3.90 (d,  $J = 14.8$  Hz, 1H), 3.59 (d,  $J = 14.8$  Hz, 1H), 2.68 – 2.52 (m, 4H).  $^{13}\text{C}$  NMR (100 MHz,  $\text{CDCl}_3$ )  $\delta$  210.9, 191.5, 140.9, 140.6, 140.5, 137.2, 135.6, 133.7, 131.7, 130.1, 129.7, 129.3, 128.8, 128.6, 128.4, 127.4, 127.0, 126.3, 109.3, 98.8, 57.6, 33.3, 31.7. HRMS (ESI):  $m/z$  calcd. for  $\text{C}_{31}\text{H}_{25}\text{Cl}_2\text{O}_3\text{S}^+([\text{M}+\text{H}]^+)$  = 547.0896, found = 547.0894.

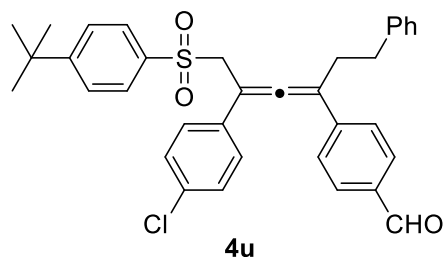

**4-(6-((4-(tert-butyl)phenyl)sulfonyl)-5-(4-chlorophenyl)-1-phenylhexa-3,4-dien-3-yl)benzaldehyde (4u):** Pale yellow solid, 48.8 mg, isolated yield 43%.  $^1\text{H NMR}$  (400 MHz,  $\text{CDCl}_3$ )  $\delta$  9.93 (s, 1H), 7.80 (d,  $J = 8.4$  Hz, 2H), 7.60 (d,  $J =$

8.8 Hz, 2H), 7.54 (d,  $J = 8.4$  Hz, 2H), 7.30 (d,  $J = 8.8$  Hz, 2H), 7.20 – 7.17 (m, 2H), 7.12 (d,  $J = 7.2$  Hz, 1H), 7.08 – 7.04 (m, 2H), 7.00 (d,  $J = 8.8$  Hz, 2H), 6.85 (d,  $J = 8.8$  Hz, 2H), 4.05 (d,  $J = 14.4$  Hz, 1H), 3.83 (d,  $J = 14.4$  Hz, 1H), 2.88 – 2.77 (m, 4H), 1.20 (s, 9H).  $^{13}\text{C NMR}$  (100 MHz,  $\text{CDCl}_3$ )  $\delta$  211.2, 191.6, 157.9, 141.1, 140.7, 135.9, 135.5, 133.2, 132.0, 130.1, 128.6, 128.5, 128.5, 128.2, 127.3, 127.1, 126.2, 126.0, 109.1, 99.1, 57.6, 35.2, 33.5, 31.7, 31.0. HRMS (ESI):  $m/z$  calcd. for  $\text{C}_{35}\text{H}_{34}\text{ClO}_3\text{S}^+([\text{M}+\text{H}]^+) = 569.1912$ , found = 569.1915.

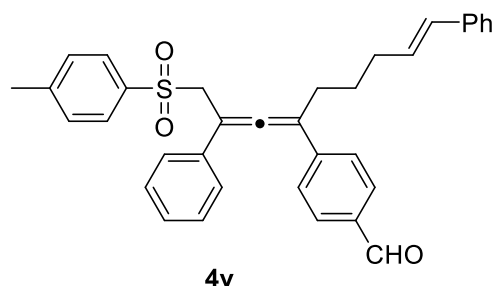

**(E)-4-(2,9-diphenyl-1-tosylnona-2,3,8-trien-4-yl)benzaldehyde (4v):** Pale yellow oil, 40.4 mg, isolated yield 38%.  $^1\text{H NMR}$  (400 MHz,  $\text{CDCl}_3$ )  $\delta$  9.99 (s, 1H), 7.81 (d,  $J = 8.4$  Hz, 2H), 7.69 (d,  $J = 8.4$  Hz, 2H), 7.52 (d,  $J =$

8.4 Hz, 2H), 7.36 – 7.27 (m, 7H), 7.24 – 7.18 (m, 3H), 7.15 (d,  $J = 8.0$  Hz, 2H), 6.33 (d,  $J = 15.6$  Hz, 1H), 6.17 (dt,  $J = 15.6, 7.2$  Hz, 1H), 4.42 – 4.28 (m, 2H), 2.61 – 2.51 (m, 2H), 2.34 (s, 3H), 2.31 – 2.23 (m, 2H), 1.78 – 1.66 (m, 2H).  $^{13}\text{C NMR}$  (125 MHz,  $\text{CDCl}_3$ )  $\delta$  210.8, 191.7, 144.7, 141.6, 137.5, 136.1, 135.3, 133.7, 130.6, 130.0, 129.8, 129.7, 128.7, 128.5, 128.4, 127.7, 127.0, 127.0, 126.2, 125.9, 109.9, 99.9, 58.0, 32.7, 29.7, 27.4, 21.6. HRMS (ESI):  $m/z$  calcd. for  $\text{C}_{35}\text{H}_{32}\text{NaO}_3\text{S}^+([\text{M}+\text{Na}]^+) = 555.1964$ , found = 555.1962.

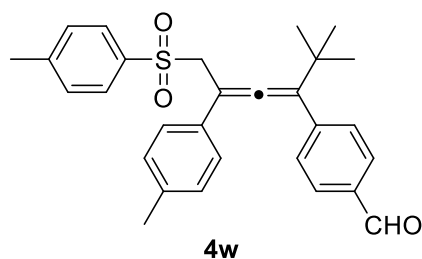

**4-(2,2-dimethyl-5-(*p*-tolyl)-6-tosylhexa-3,4-dien-3-yl)benzaldehyde (4w):** Pale yellow oil, 31.1 mg, isolated yield 34%. <sup>1</sup>H NMR (500 MHz, CDCl<sub>3</sub>) δ 10.02 (s, 1H), 7.80 (d, *J* = 6.8 Hz, 2H), 7.50 (d, *J* = 6.8 Hz, 2H), 7.36 (d, *J* = 6.4 Hz, 2H), 7.15 (d, *J* =

6.4 Hz, 2H), 7.05 (d, *J* = 6.0 Hz, 2H), 7.01 (d, *J* = 6.4 Hz, 2H), 4.27 (d, *J* = 11.6 Hz, 1H), 4.20 (d, *J* = 11.2 Hz, 1H), 2.31 (s, 3H), 2.28 (s, 3H), 1.17 (s, 9H). <sup>13</sup>C NMR (125 MHz, CDCl<sub>3</sub>) δ 205.4, 191.8, 144.4, 142.9, 137.1, 135.7, 135.1, 131.4, 129.9, 129.4, 129.3, 129.2, 128.4, 125.7, 119.1, 97.5, 58.8, 36.1, 29.6, 21.6, 21.0. HRMS (ESI): *m/z* calcd. for C<sub>29</sub>H<sub>31</sub>O<sub>3</sub>S<sup>+</sup> ([M+H]<sup>+</sup>) = 459.1988, found = 459.1987.

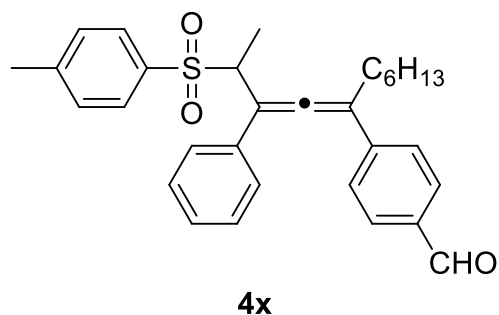

**4-(3-(*p*-tolyl)-2-tosylundeca-3,4-dien-5-yl)benzaldehyde (4x):** Pale yellow oil, 40.6 mg, isolated yield 42%. <sup>1</sup>H NMR (400 MHz, CDCl<sub>3</sub>) δ 9.88 (s, 1H), 7.72 (d, *J* = 8.5 Hz, 2H), 7.64 (d, *J* = 8.4 Hz, 2H), 7.41 (d, *J* = 8.4 Hz, 2H), 7.24 – 7.09 (m, 7H), 4.32 (q, *J* = 7.2 Hz,

1H), 2.54 – 2.45 (m, 2H), 2.31 (s, 3H), 1.67 – 1.51 (m, 2H), 1.46 (d, *J* = 7.2 Hz, 3H), 1.40 – 1.30 (m, 2H), 1.30 – 1.21 (m, 4H), 0.81 (t, *J* = 6.8 Hz, 3H). <sup>13</sup>C NMR (100 MHz, CDCl<sub>3</sub>) δ 210.2, 191.6, 144.6, 141.7, 135.2, 134.9, 134.8, 130.0, 129.5, 129.2, 128.5, 127.3, 126.5, 126.4, 111.9, 105.9, 60.9, 31.6, 30.1, 29.4, 28.2, 22.7, 21.5, 14.7, 14.1. HRMS (ESI): *m/z* calcd. for C<sub>31</sub>H<sub>34</sub>O<sub>3</sub>SNa<sup>+</sup> ([M+Na]<sup>+</sup>) = 509.2121, found = 509.2118.

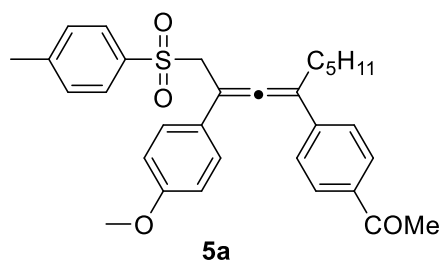

**1-(4-(2-(4-methoxyphenyl)-1-tosylnona-2,3-dien-4-yl)phenyl)ethan-1-one (5a):** Pale yellow oil, for the reaction of 4'-iodoacetophenone (84.3 mg, isolated yield 84%), for the reaction of 4'-bromoacetophenone (79.3 mg, isolated yield 79%).

<sup>1</sup>H NMR (500 MHz, CDCl<sub>3</sub>) δ 7.89 (d, *J* = 6.8 Hz, 2H), 7.71 (d, *J* = 6.4 Hz, 2H), 7.42



(d,  $J = 6.8$  Hz, 2H), 7.28 (d,  $J = 7.2$  Hz, 2H), 7.20 (d,  $J = 6.4$  Hz, 2H), 6.82 (d,  $J = 6.6$  Hz, 2H), 4.39 – 4.30 (m, 2H), 3.80 (s, 3H), 2.60 (s, 3H), 2.47 – 2.36 (m, 2H), 2.37 (s, 3H), 1.54 – 1.45 (m, 2H), 1.35 – 1.27 (m, 4H), 0.87 (t,  $J = 7.0$  Hz, 3H).  $^{13}\text{C}$  NMR (125 MHz,  $\text{CDCl}_3$ )  $\delta$  210.1, 197.6, 159.2, 144.6, 140.6, 136.1, 135.8, 129.7, 128.6, 128.4, 127.5, 126.5, 126.0, 114.1, 109.8, 99.2, 58.3, 55.3, 31.7, 30.3, 27.6, 26.6, 22.5, 21.6, 14.1. HRMS (ESI):  $m/z$  calcd. for  $\text{C}_{31}\text{H}_{34}\text{O}_4\text{SNa}^+([\text{M}+\text{Na}]^+) = 525.2070$ , found = 525.2072.

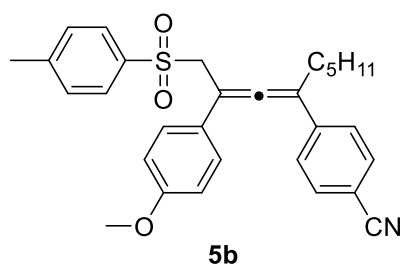

**4-(2-(4-methoxyphenyl)-1-tosylnona-2,3-dien-4-yl)benzotrile (5b):** Pale yellow oil, for the reaction of 4-iodobenzotrile (80.5 mg, isolated yield 83%), for the reaction of 4-bromobenzotrile (82.5 mg, isolated yield 85%).  $^1\text{H}$  NMR (400 MHz,  $\text{CDCl}_3$ )  $\delta$

7.69 (d,  $J = 8.4$  Hz, 2H), 7.56 (d,  $J = 8.8$  Hz, 2H), 7.45 (d,  $J = 8.8$  Hz, 2H), 7.23 (d,  $J = 8.8$  Hz, 2H), 7.19 (d,  $J = 8.0$  Hz, 2H), 6.80 (d,  $J = 8.8$  Hz, 2H), 4.36 – 4.24 (m, 2H), 3.78 (s, 3H), 2.49 – 2.34 (m, 5H), 1.54 – 1.43 (m, 2H), 1.33 – 1.23 (m, 4H), 0.85 (t,  $J = 6.8$  Hz, 3H).  $^{13}\text{C}$  NMR (100 MHz,  $\text{CDCl}_3$ )  $\delta$  210.1, 159.3, 144.6, 140.6, 136.2, 132.2, 129.6, 128.3, 127.4, 127.0, 125.6, 118.9, 114.1, 110.6, 109.4, 99.6, 58.2, 55.3, 31.6, 30.1, 27.4, 22.4, 21.6, 14.0. HRMS (ESI):  $m/z$  calcd. for  $\text{C}_{30}\text{H}_{32}\text{NO}_3\text{S}^+([\text{M}+\text{H}]^+) = 486.2097$ , found = 486.2095.

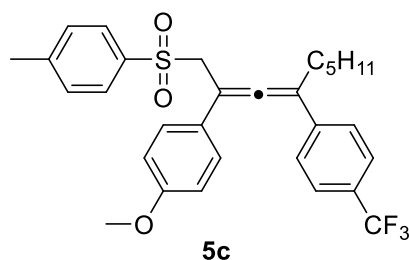

**1-methoxy-4-(1-tosyl-4-(4-(trifluoromethyl)phenyl)nona-2,3-dien-2-yl)benzene (5c):** Pale yellow oil, for the reaction of 1-iodo-4-(trifluoromethyl)benzene (70.7 mg, isolated yield 67%), for the reaction of 1-bromo-4-

(trifluoromethyl)benzene (79.2 mg, isolated yield 75%).  $^1\text{H}$  NMR (400 MHz,  $\text{CDCl}_3$ )  $\delta$  7.60 (d,  $J = 8.4$  Hz, 2H), 7.44 (d,  $J = 8.4$  Hz, 2H), 7.32 (d,  $J = 8.4$  Hz, 2H), 7.19 (d,  $J = 8.8$  Hz, 2H), 7.08 (d,  $J = 8.0$  Hz, 2H), 6.73 (d,  $J = 8.8$  Hz, 2H), 4.30 – 4.17 (m, 2H),

3.71 (s, 3H), 2.41 – 2.29 (m, 2H), 2.27 (s, 3H), 1.44 – 1.35 (m, 2H), 1.24 – 1.17 (m, 4H), 0.77 (t,  $J = 6.8$  Hz, 3H).  $^{13}\text{C}$  NMR (125 MHz,  $\text{CDCl}_3$ )  $\delta$  209.5, 159.2, 144.6, 139.3, 136.0, 129.6, 129.4 (q,  $J = 32.5$  Hz), 128.4, 127.4, 127.3 (q,  $J = 348.8$  Hz), 126.6, 125.9, 125.3 (q,  $J = 2.5$  Hz), 114.1, 109.4, 99.2, 58.3, 55.3, 31.7, 30.3, 27.5, 22.4, 21.5, 14.0. HRMS (ESI):  $m/z$  calcd. for  $\text{C}_{30}\text{H}_{31}\text{F}_3\text{O}_3\text{SNa}^+([\text{M}+\text{Na}]^+) = 551.1838$ , found = 551.1839.

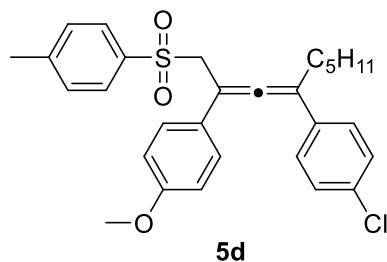

**1-chloro-4-(2-(4-methoxyphenyl)-1-tosylnona-2,3-dien-4-yl)benzene (5d):** Pale yellow oil, for the reaction of 1-chloro-4-iodobenzene (60.3 mg, isolated yield 61%), for the reaction of 1-bromo-4-chlorobenzene (56.3 mg, isolated yield 57%).  $^1\text{H}$  NMR

(400 MHz,  $\text{CDCl}_3$ )  $\delta$  7.59 (d,  $J = 8.0$  Hz, 2H), 7.19 (d,  $J = 8.8$  Hz, 2H), 7.17 – 7.10 (m, 4H), 7.08 (d,  $J = 8.0$  Hz, 2H), 6.73 (d,  $J = 8.8$  Hz, 2H), 4.30 – 4.17 (m, 2H), 3.71 (s, 3H), 2.36 – 2.19 (m, 5H), 1.42 – 1.32 (m, 2H), 1.24 – 1.16 (m, 4H), 0.77 (t,  $J = 7.2$  Hz, 3H).  $^{13}\text{C}$  NMR (100 MHz,  $\text{CDCl}_3$ )  $\delta$  209.0, 159.1, 144.5, 136.0, 133.9, 133.0, 129.5, 128.5, 128.3, 127.7, 127.3, 126.2, 114.0, 109.4, 98.8, 58.4, 55.3, 31.7, 30.4, 27.5, 22.4, 21.5, 14.0. HRMS (ESI):  $m/z$  calcd. for  $\text{C}_{29}\text{H}_{31}\text{ClO}_3\text{SNa}^+([\text{M}+\text{Na}]^+) = 517.1575$ , found = 517.1574.

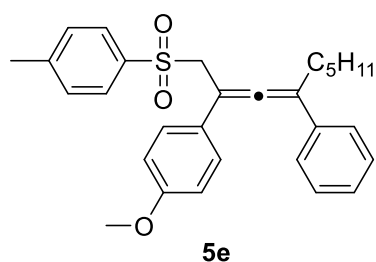

**1-methoxy-4-(4-phenyl-1-tosylnona-2,3-dien-2-yl)benzene (5e):** Pale yellow oil, for the reaction of iodobenzene (54.3 mg, isolated yield 59%), for the reaction of bromobenzene (47.9 mg, isolated yield 52%).  $^1\text{H}$  NMR (400 MHz,  $\text{CDCl}_3$ )  $\delta$  7.60 (d,  $J = 8.0$

Hz, 2H), 7.22 (d,  $J = 9.2$  Hz, 2H), 7.20 – 7.17 (m, 4H), 7.17 – 7.12 (m, 1H), 7.08 (d,  $J = 8.0$  Hz, 2H), 6.73 (d,  $J = 8.8$  Hz, 2H), 4.24 (s, 2H), 3.71 (s, 3H), 2.40 – 2.18 (m, 5H), 1.43 – 1.32 (m, 2H), 1.27 – 1.15 (m, 4H), 0.78 (t,  $J = 7.2$  Hz, 3H);  $^{13}\text{C}$  NMR (125 MHz,  $\text{CDCl}_3$ )  $\delta$  209.1, 158.9, 144.3, 136.0, 135.4, 129.5, 128.4, 128.4, 127.4, 127.3, 126.6, 126.4, 113.9, 110.1, 98.4, 58.5, 55.3, 31.7, 30.4, 27.6, 22.4, 21.6, 14.0. HRMS (ESI):

m/z calcd. for  $C_{29}H_{33}O_3S^+([M+H]^+) = 461.2145$ , found = 461.2147.

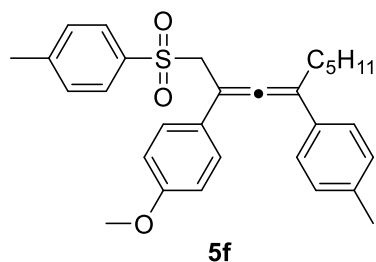

**1-methoxy-4-(4-(*p*-tolyl)-1-tosylnona-2,3-dien-2-yl)benzene (5f):** Pale yellow oil, for the reaction of 1-iodo-4-methylbenzene (54.0 mg, isolated yield 57%), for the reaction of 1-bromo-4-methylbenzene (36.9 mg, isolated yield 39%).  $^1H$  NMR (500 MHz,  $CDCl_3$ )  $\delta$  7.69

(d,  $J = 6.8$  Hz, 2H), 7.30 (d,  $J = 6.4$  Hz, 2H), 7.16 (d,  $J = 6.4$  Hz, 4H), 7.09 (d,  $J = 6.4$  Hz, 2H), 6.81 (d,  $J = 6.8$  Hz, 2H), 4.32 (s, 2H), 3.79 (s, 3H), 2.41 – 2.25 (m, 8H), 1.48 – 1.42 (m, 2H), 1.31 – 1.24 (m, 4H), 0.85 (t,  $J = 6.6$  Hz, 3H).  $^{13}C$  NMR (125 MHz,  $CDCl_3$ )  $\delta$  209.0, 158.9, 144.3, 137.1, 136.0, 132.3, 129.5, 129.1, 128.4, 127.3, 126.7, 126.3, 113.9, 110.0, 98.2, 58.6, 55.3, 31.8, 30.4, 27.6, 22.4, 21.5, 21.1, 14.0. HRMS (ESI): m/z calcd. for  $C_{30}H_{34}O_3SNa^+([M+Na]^+) = 497.2121$ , found = 497.2115.

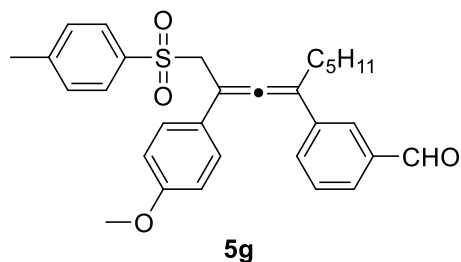

**3-(2-(4-methoxyphenyl)-1-tosylnona-2,3-dien-4-yl)benzaldehyde (5g):** Pale yellow oil, 50.6 mg, isolated yield 52%.  $^1H$  NMR (400 MHz,  $CDCl_3$ )  $\delta$  10.00 (s, 1H), 7.86 (t,  $J = 1.2$  Hz, 1H), 7.77 – 7.73 (m, 1H), 7.69 (d,  $J = 8.4$  Hz, 2H),

7.65 – 7.60 (m, 1H), 7.45 (t,  $J = 7.6$  Hz, 1H), 7.26 (d,  $J = 8.8$  Hz, 2H), 7.16 (d,  $J = 8.0$  Hz, 2H), 6.80 (d,  $J = 8.8$  Hz, 2H), 4.40 – 4.24 (m, 2H), 3.78 (s, 3H), 2.55 – 2.37 (m, 2H), 2.34 (s, 3H), 1.54 – 1.43 (m, 2H), 1.35 – 1.25 (m, 4H), 0.85 (t,  $J = 6.8$  Hz, 3H).  $^{13}C$  NMR (100 MHz,  $CDCl_3$ )  $\delta$  209.2, 192.3, 159.1, 144.5, 136.8, 136.7, 136.2, 132.7, 129.6, 129.2, 128.6, 128.3, 127.4, 127.3, 126.1, 114.1, 109.5, 99.2, 58.4, 55.3, 31.7, 30.3, 27.5, 22.4, 21.5, 14.0. HRMS (ESI): m/z calcd. for  $C_{30}H_{33}O_4S^+([M+H]^+) = 489.2094$ , found = 489.2095.

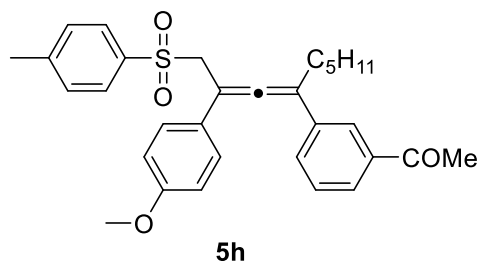

**1-(3-(2-(4-methoxyphenyl)-1-tosylnona-2,3-dien-4-yl)phenyl)ethan-1-one (5h):** Pale

yellow oil, 55.2 mg, isolated yield 55%. <sup>1</sup>H NMR (400 MHz, CDCl<sub>3</sub>) δ 8.04 (t, *J* = 1.2 Hz, 1H), 7.84 – 7.81 (m, 1H), 7.70 (d, *J* = 8.4 Hz,

2H), 7.57 – 7.53 (m, 1H), 7.39 (t, *J* = 8.0 Hz, 1H), 7.25 (d, *J* = 9.2 Hz, 2H), 7.17 (d, *J* = 7.6 Hz, 2H), 6.79 (d, *J* = 9.2 Hz, 2H), 4.36 – 4.25 (m, 2H), 3.78 (s, 3H), 2.61 (s, 3H), 2.51 – 2.38 (m, 2H), 2.35 (s, 3H), 1.53 – 1.43 (m, 2H), 1.35 – 1.27 (m, 4H), 0.85 (t, *J* = 6.8 Hz, 3H). <sup>13</sup>C NMR (100 MHz, CDCl<sub>3</sub>) δ 209.2, 198.3, 159.1, 144.5, 137.5, 136.3, 136.2, 131.3, 129.6, 128.7, 128.4, 127.4, 127.2, 126.4, 126.2, 114.0, 109.8, 99.0, 58.5, 55.3, 31.7, 30.4, 27.5, 26.8, 22.4, 21.6, 14.0. HRMS (ESI): *m/z* calcd. for C<sub>31</sub>H<sub>34</sub>O<sub>4</sub>SNa<sup>+</sup>([M+Na]<sup>+</sup>) = 525.2070, found = 525.2071.

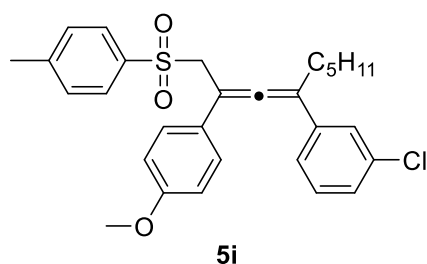

**1-chloro-3-(2-(4-methoxyphenyl)-1-tosylnona-2,3-dien-4-yl)benzene (5i):** Pale yellow oil, 50.4

mg, isolated yield 51%. <sup>1</sup>H NMR (400 MHz, CDCl<sub>3</sub>) δ 7.60 (d, *J* = 8.0 Hz, 2H), 7.22 – 7.16 (m, 3H), 7.15 – 7.10 (m, 3H), 7.08 (d, *J* = 8.0 Hz, 2H), 6.73 (d, *J*

= 8.8 Hz, 2H), 4.28 – 4.19 (m, 2H), 3.71 (s, 3H), 2.35 – 2.19 (m, 5H), 1.43 – 1.32 (m, 2H), 1.25 – 1.16 (m, 4H), 0.78 (t, *J* = 6.8 Hz, 3H). <sup>13</sup>C NMR (100 MHz, CDCl<sub>3</sub>) δ 209.0, 159.1, 144.4, 137.6, 136.0, 135.4, 129.6, 129.5, 128.3, 127.4, 127.3, 126.4, 126.2, 124.7, 114.0, 109.4, 99.0, 58.3, 55.3, 31.7, 30.4, 27.5, 22.4, 21.6, 14.0. HRMS (ESI): *m/z* calcd. for C<sub>29</sub>H<sub>31</sub>ClO<sub>3</sub>SNa<sup>+</sup>([M+Na]<sup>+</sup>) = 517.1575, found = 517.1572.

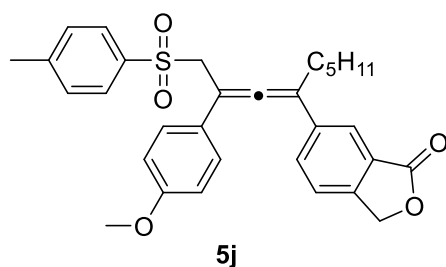

**5-(2-(4-methoxyphenyl)-1-tosylnona-2,3-dien-4-yl)-2,3-dihydro-1H-inden-1-one (5j):** Pale

yellow oil, 94.6 mg, isolated yield 92%. <sup>1</sup>H NMR (400 MHz, CDCl<sub>3</sub>) δ 7.82 (d, *J* = 8.0 Hz, 1H), 7.70 (d, *J* = 8.4 Hz, 2H), 7.55 (s, 1H), 7.50 (dd, *J* = 8.0,

1.2 Hz, 1H), 7.26 – 7.22 (d,  $J = 8.8$ , 2H), 7.19 (d,  $J = 8.0$  Hz, 2H), 6.80 (d,  $J = 8.8$  Hz, 2H), 5.28 (s, 2H), 4.35 – 4.26 (m, 2H), 3.78 (s, 3H), 2.54 – 2.40 (m, 2H), 2.36 (s, 3H), 1.54 – 1.46 (m, 2H), 1.37 – 1.27 (m, 4H), 0.85 (t,  $J = 6.8$  Hz, 3H).  $^{13}\text{C}$  NMR (100 MHz,  $\text{CDCl}_3$ )  $\delta$  210.2, 170.8, 159.3, 147.1, 144.6, 142.2, 136.2, 129.6, 128.3, 127.4, 127.3, 125.6, 125.6, 124.4, 119.9, 114.1, 109.8, 99.3, 69.6, 58.2, 55.3, 31.6, 30.4, 27.5, 22.4, 21.5, 14.0. HRMS (ESI):  $m/z$  calcd. for  $\text{C}_{31}\text{H}_{32}\text{O}_5\text{SNa}^+([\text{M}+\text{Na}]^+) = 539.1863$ , found = 539.1862.

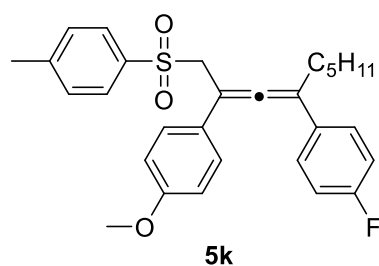

**1-fluoro-4-(2-(4-methoxyphenyl)-1-tosylnona-2,3-dien-4-yl)benzene (5k):** Pale yellow oil, 57.4 mg, isolated yield 60%.  $^1\text{H}$  NMR (400 MHz,  $\text{CDCl}_3$ )  $\delta$  7.65 (d,  $J = 8.4$  Hz, 2H), 7.27 – 7.20 (m, 4H), 7.14 (d,  $J = 8.0$  Hz, 2H), 6.94 (t,  $J = 8.4$  Hz, 2H), 6.78 (d,  $J = 8.8$

Hz, 2H), 4.34 – 4.23 (m, 2H), 3.76 (s, 3H), 2.40 – 2.26 (m, 5H), 1.48 – 1.38 (m, 2H), 1.29 – 1.22 (m, 4H), 0.83 (t,  $J = 7.2$  Hz, 3H).  $^{13}\text{C}$  NMR (100 MHz,  $\text{CDCl}_3$ )  $\delta$  208.8 (d,  $J = 2.0$  Hz), 162.1 (d,  $J = 245.0$  Hz), 159.0, 144.4, 136.1, 131.4, 129.5, 128.4, 128.0 (d,  $J = 8.0$  Hz), 127.3, 126.5, 115.3 (d,  $J = 21.0$  Hz), 114.0, 109.4, 98.6, 58.5, 55.3, 31.7, 30.6, 27.5, 22.4, 21.5, 14.0. HRMS (ESI):  $m/z$  calcd. for  $\text{C}_{29}\text{H}_{31}\text{FO}_3\text{SNa}^+([\text{M}+\text{Na}]^+) = 501.1870$ , found = 501.1868.

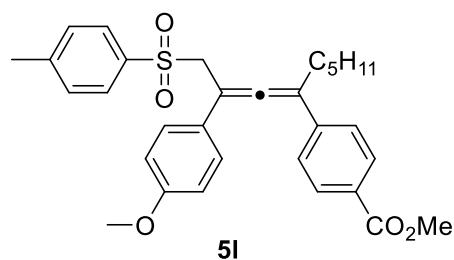

**methyl 4-(2-(4-methoxyphenyl)-1-tosylnona-2,3-dien-4-yl)benzoate (5l):** Pale yellow oil, 71.5 mg, isolated yield 69%.  $^1\text{H}$  NMR (400 MHz,  $\text{CDCl}_3$ )  $\delta$  7.85 (d,  $J = 8.4$  Hz, 2H), 7.59 (d,  $J = 8.0$  Hz, 2H), 7.24 (d,  $J = 8.4$  Hz, 2H), 7.19 (d,  $J = 9.2$

Hz, 2H), 7.08 (d,  $J = 8.0$  Hz, 2H), 6.73 (d,  $J = 8.8$  Hz, 2H), 4.30 – 4.19 (m, 2H), 3.83 (s, 3H), 3.70 (s, 3H), 2.39 – 2.24 (m, 5H), 1.44 – 1.34 (m, 2H), 1.25 – 1.16 (m, 4H), 0.76 (t,  $J = 6.8$  Hz, 3H).  $^{13}\text{C}$  NMR (100 MHz,  $\text{CDCl}_3$ )  $\delta$  209.8, 166.8, 159.1, 144.5, 140.3, 136.0, 129.7, 129.6, 128.7, 128.4, 127.4, 126.2, 126.0, 114.0, 109.7, 99.1, 58.3,

55.2, 52.0, 31.6, 30.3, 27.5, 22.4, 21.5, 14.0. HRMS (ESI):  $m/z$  calcd. for  $C_{31}H_{35}O_5S^+([M+H]^+) = 519.2200$ , found = 519.2198.

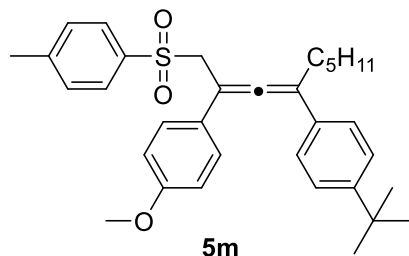

**1-(*tert*-butyl)-4-(2-(4-methoxyphenyl)-1-tosylnona-2,3-dien-4-yl)benzene (5m):** Pale yellow oil, 58.8 mg, isolated yield 57%.  $^1H$  NMR (400 MHz,  $CDCl_3$ )  $\delta$  7.61 (d,  $J = 8.4$  Hz, 2H), 7.24 – 7.20 (m, 4H), 7.14 (d,  $J = 8.4$  Hz, 2H), 7.09 (d,  $J = 8.0$  Hz,

2H), 6.71 (d,  $J = 8.8$  Hz, 2H), 4.23 (s, 2H), 3.70 (s, 3H), 2.29 (s, 3H), 2.28-2.15 (m, 2H), 1.39 – 1.36 (m, 2H), 1.23 (s, 9H), 1.21 – 1.16 (m, 4H), 0.77 (t,  $J = 6.8$  Hz, 3H).  $^{13}C$  NMR (100 MHz,  $CDCl_3$ )  $\delta$  209.2, 158.9, 150.3, 144.3, 136.1, 132.2, 129.5, 128.5, 127.4, 126.7, 126.1, 125.4, 113.9, 109.8, 98.4, 58.6, 55.2, 34.5, 31.8, 31.3, 30.2, 27.7, 22.4, 21.6, 14.0. HRMS (ESI):  $m/z$  calcd. for  $C_{33}H_{41}O_3S^+([M+H]^+) = 517.2771$ , found = 517.2765.

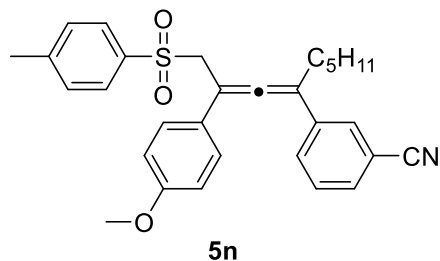

**3-(2-(4-methoxyphenyl)-1-tosylnona-2,3-dien-4-yl)benzonitrile (5n):** Pale yellow oil, 62.1 mg, isolated yield 64%.  $^1H$  NMR (400 MHz,  $CDCl_3$ )  $\delta$  7.69 (d,  $J = 8.0$  Hz, 2H), 7.63 – 7.59 (m, 1H), 7.57 – 7.56 (m, 1H), 7.52 – 7.48 (m, 1H), 7.41 – 7.37

(m, 1H), 7.23 (d,  $J = 8.8$  Hz, 2H), 7.18 (d,  $J = 8.0$  Hz, 2H), 6.80 (d,  $J = 8.8$  Hz, 2H), 4.35 – 4.26 (m, 2H), 3.78 (s, 3H), 2.47 – 2.28 (m, 5H), 1.53 – 1.43 (m, 2H), 1.35 – 1.23 (m, 4H), 0.85 (t,  $J = 6.8$  Hz, 3H).  $^{13}C$  NMR (100 MHz,  $CDCl_3$ )  $\delta$  209.2, 159.2, 144.6, 137.1, 136.1, 131.0, 130.6, 129.6, 129.6, 129.2, 128.3, 127.3, 125.7, 118.8, 114.1, 112.6, 108.9, 99.6, 58.1, 55.3, 31.6, 30.2, 27.4, 22.4, 21.5, 14.0. HRMS (ESI):  $m/z$  calcd. for  $C_{30}H_{31}NO_3SNa^+([M+Na]^+) = 508.1917$ , found = 508.1916.

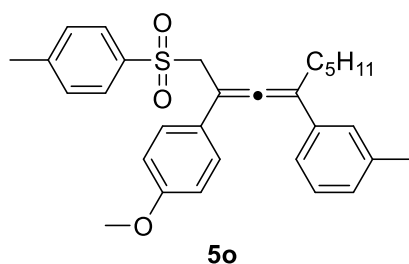

**1-(2-(4-methoxyphenyl)-1-tosylnona-2,3-dien-4-yl)-3-methylbenzene (5o):** Pale yellow oil, 56.9 mg,

isolated yield 60%.  $^1\text{H}$  NMR (400 MHz,  $\text{CDCl}_3$ )  $\delta$  7.68 (d,  $J = 8.4$  Hz, 2H), 7.30 (d,  $J = 8.8$  Hz, 2H), 7.19 – 7.12 (m, 4H), 7.10 – 7.02 (m, 2H), 6.81 (d,  $J = 8.8$  Hz, 2H), 4.36 – 4.28 (m, 2H), 3.79 (s, 3H), 2.41 – 2.27 (m, 8H), 1.51 – 1.41 (m, 2H), 1.33 – 1.25 (m, 4H), 0.86 (t,  $J = 6.8$  Hz, 3H).  $^{13}\text{C}$  NMR (100 MHz,  $\text{CDCl}_3$ )  $\delta$  209.1, 158.9, 144.3, 138.0, 136.1, 135.4, 129.5, 128.4, 128.3, 128.1, 127.3, 127.1, 126.7, 123.6, 113.9, 110.2, 98.2, 58.6, 55.3, 31.8, 30.4, 27.7, 22.4, 21.5, 21.5, 14.0. HRMS (ESI):  $m/z$  calcd. for  $\text{C}_{30}\text{H}_{34}\text{O}_3\text{SNa}^+([\text{M}+\text{Na}]^+) = 497.2121$ , found = 497.2119.

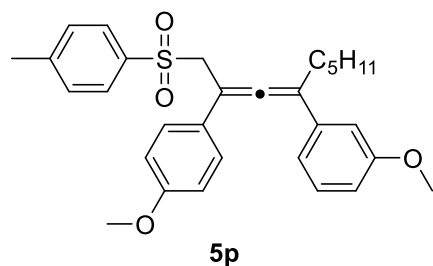

**1-methoxy-3-(2-(4-methoxyphenyl)-1-tosylnona-2,3-dien-4-yl)benzene (5p):** Pale yellow oil, 59.8 mg, isolated yield 61%.  $^1\text{H}$  NMR (400 MHz,  $\text{CDCl}_3$ )  $\delta$  7.60 (d,  $J = 8.4$  Hz, 2H), 7.19 (d,  $J = 8.8$  Hz, 2H), 7.11 (t,  $J = 8.0$  Hz, 1H), 7.07 (d,  $J = 8.0$  Hz, 2H), 6.89 (s, 1H), 6.81 (d,  $J = 8.0$  Hz, 1H), 6.71 (d,  $J = 8.8$  Hz, 3H), 4.27 – 4.17 (m, 2H), 3.71 (s, 3H), 3.69 (s, 3H), 2.35 – 2.18 (m, 5H), 1.43 – 1.32 (m, 2H), 1.23 – 1.16 (m, 4H), 0.76 (t,  $J = 6.8$  Hz, 3H).  $^{13}\text{C}$  NMR (100 MHz,  $\text{CDCl}_3$ )  $\delta$  209.2, 159.7, 158.9, 144.3, 137.0, 136.2, 129.5, 129.3, 128.4, 127.3, 126.6, 118.8, 113.9, 112.8, 112.3, 110.1, 98.4, 58.6, 55.3, 55.2, 31.7, 30.4, 27.6, 22.4, 21.5, 14.0. HRMS (ESI):  $m/z$  calcd. for  $\text{C}_{30}\text{H}_{34}\text{O}_4\text{SNa}^+([\text{M}+\text{Na}]^+) = 513.2070$ , found = 513.2069.

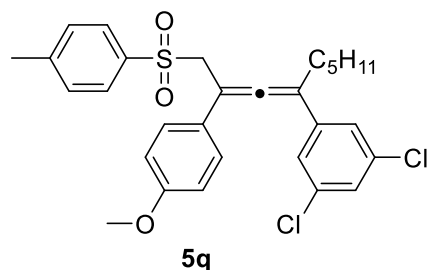

**1,3-dichloro-5-(2-(4-methoxyphenyl)-1-tosylnona-2,3-dien-4-yl)benzene (5q):** Pale yellow oil, 91.9 mg, isolated yield 87%.  $^1\text{H}$  NMR (400 MHz,  $\text{CDCl}_3$ )  $\delta$  7.68 (d,  $J = 8.4$  Hz, 2H), 7.24 (d,  $J = 9.2$  Hz, 2H), 7.22 – 7.20 (m, 1H), 7.19 – 7.16 (m, 3H), 7.16 (s, 1H), 6.81 (d,  $J = 8.8$  Hz, 2H), 4.35 – 4.26 (m, 2H), 3.79 (s, 3H), 2.41

– 2.27 (m, 5H), 1.51 – 1.40 (m, 2H), 1.32 – 1.24 (m, 4H), 0.85 (t,  $J = 7.2$  Hz, 3H).  $^{13}\text{C}$  NMR (100 MHz,  $\text{CDCl}_3$ )  $\delta$  209.0, 159.3, 144.5, 139.1, 135.9, 135.0, 129.6, 128.3, 127.4, 127.2, 125.7, 124.8, 114.1, 108.8, 99.5, 58.1, 55.3, 31.6, 30.4, 27.4, 22.4, 21.5, 14.0. HRMS (ESI):  $m/z$  calcd. for  $\text{C}_{29}\text{H}_{30}\text{Cl}_2\text{O}_3\text{SNa}^+([\text{M}+\text{Na}]^+)$  = 551.1182, found = 551.1185.

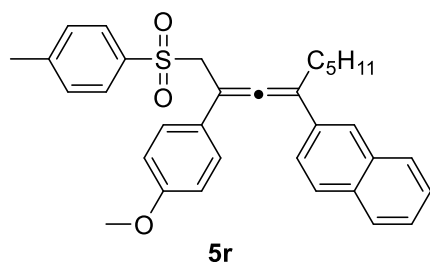

**2-(2-(4-methoxyphenyl)-1-tosylnona-2,3-dien-4-yl)naphthalene (5r):** Pale yellow oil, 87.7 mg, isolated yield 86%.  $^1\text{H}$  NMR (400 MHz,  $\text{CDCl}_3$ )  $\delta$  7.83 – 7.77 (m, 2H), 7.73 – 7.67 (m, 4H), 7.50 – 7.43 (m, 2H), 7.39 (dd,  $J = 8.4, 1.2$  Hz, 1H), 7.35

(d,  $J = 9.2$  Hz, 2H), 7.08 (d,  $J = 8.0$  Hz, 2H), 6.83 (d,  $J = 8.8$  Hz, 2H), 4.42 – 4.32 (m, 2H), 3.80 (s, 3H), 2.59 – 2.39 (m, 2H), 2.22 (s, 3H), 1.58 – 1.47 (m, 2H), 1.38 – 1.28 (m, 4H), 0.87 (t,  $J = 6.8$  Hz, 3H).  $^{13}\text{C}$  NMR (100 MHz,  $\text{CDCl}_3$ )  $\delta$  209.7, 159.0, 144.3, 136.0, 133.5, 132.9, 132.7, 129.5, 128.4, 128.1, 127.9, 127.5, 127.4, 126.5, 126.1, 125.9, 125.4, 124.4, 114.0, 110.5, 98.7, 58.5, 55.3, 31.8, 30.4, 27.7, 22.4, 21.4, 14.0. HRMS (ESI):  $m/z$  calcd. for  $\text{C}_{33}\text{H}_{34}\text{O}_3\text{SNa}^+([\text{M}+\text{Na}]^+)$  = 533.2121, found = 533.2125.

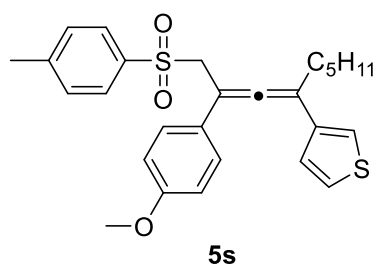

**3-(2-(4-methoxyphenyl)-1-tosylnona-2,3-dien-4-yl)thiophene (5s):** Pale yellow oil, 47.5 mg, isolated yield 51%.  $^1\text{H}$  NMR (400 MHz, DMSO)  $\delta$  7.70 (d,  $J = 8.4$  Hz, 2H), 7.48 – 7.44 (m, 1H), 7.43 – 7.37 (m, 1H), 7.34 (d,  $J = 8.0$  Hz, 2H), 7.25 (d,  $J = 8.8$  Hz, 2H), 6.93

(dd,  $J = 4.8, 0.8$  Hz, 1H), 6.83 (d,  $J = 8.8$  Hz, 2H), 4.67 – 4.65 (m, 2H), 3.72 (s, 3H), 2.36 (s, 3H), 2.34 – 2.18 (m, 2H), 1.44 – 1.30 (m, 2H), 1.26 – 1.15 (m, 4H), 0.78 (t,  $J = 6.8$  Hz, 3H).  $^{13}\text{C}$  NMR (100 MHz, DMSO)  $\delta$  208.6, 158.5, 144.2, 136.7, 136.3, 129.6, 127.9, 127.5, 126.8, 126.7, 126.1, 120.9, 113.8, 105.2, 98.2, 56.8, 55.1, 31.1, 30.3, 27.0, 21.9, 21.1, 13.9. HRMS (ESI):  $m/z$  calcd. for  $\text{C}_{27}\text{H}_{31}\text{O}_3\text{S}_2^+([\text{M}+\text{H}]^+)$  = 467.1709, found = 467.1704.



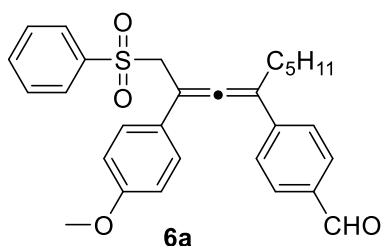

**4-(2-(4-methoxyphenyl)-1-(phenylsulfonyl)nona-2,3-dien-4-yl)benzaldehyde (6a):** Pale yellow oil, 77.7 mg, isolated yield 82%.  $^1\text{H}$  NMR (400 MHz,  $\text{CDCl}_3$ )  $\delta$  9.91 (s, 1H), 7.79 – 7.67 (m, 4H), 7.48 – 7.43 (m, 1H), 7.41 (d,  $J = 8.4$  Hz, 2H), 7.33 (t,  $J = 8.0$  Hz,

2H), 7.18 (d,  $J = 8.8$  Hz, 2H), 6.73 (d,  $J = 8.8$  Hz, 2H), 4.33 – 4.20 (m, 2H), 3.71 (s, 3H), 2.45 – 2.28 (m, 2H), 1.48 – 1.36 (m, 2H), 1.28 – 1.20 (m, 4H), 0.78 (t,  $J = 7.2$  Hz, 3H).  $^{13}\text{C}$  NMR (100 MHz,  $\text{CDCl}_3$ )  $\delta$  210.4, 191.7, 159.2, 142.0, 139.1, 135.2, 133.6, 129.9, 129.0, 128.4, 127.4, 126.9, 125.7, 114.1, 109.9, 99.2, 58.3, 55.3, 31.7, 30.3, 27.5, 22.4, 14.0. HRMS (ESI):  $m/z$  calcd. for  $\text{C}_{29}\text{H}_{31}\text{O}_4\text{S}^+([\text{M}+\text{H}]^+)$  = 475.1938, found = 475.1937.

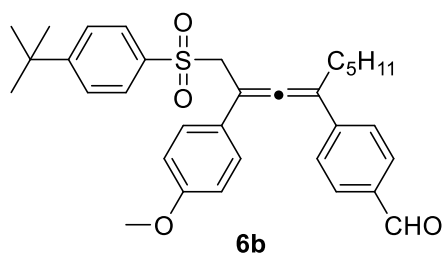

**4-(1-((4-(tert-butyl)phenyl)sulfonyl)-2-(4-methoxyphenyl)nona-2,3-dien-4-yl)benzaldehyde (6b):** Pale yellow oil, 91.2 mg, isolated yield 86%.  $^1\text{H}$  NMR (400 MHz,  $\text{CDCl}_3$ )  $\delta$  9.98 (s, 1H), 7.83 (d,  $J = 8.4$  Hz, 2H), 7.74 (d,

$J = 8.4$  Hz, 2H), 7.59 (d,  $J = 8.4$  Hz, 2H), 7.39 (d,  $J = 8.8$  Hz, 2H), 7.18 (d,  $J = 8.8$  Hz, 2H), 6.75 (d,  $J = 8.8$  Hz, 2H), 4.31 (s, 2H), 3.76 (s, 3H), 2.57 – 2.37 (m, 2H), 1.63 – 1.46 (m, 2H), 1.39 – 1.30 (m, 4H), 1.28 (s, 9H), 0.85 (t,  $J = 6.8$  Hz, 3H).  $^{13}\text{C}$  NMR (100 MHz,  $\text{CDCl}_3$ )  $\delta$  210.5, 191.7, 159.0, 157.6, 142.0, 136.1, 135.2, 130.0, 128.3, 127.3, 127.0, 126.0, 125.9, 114.0, 109.8, 99.2, 58.2, 55.2, 35.1, 31.7, 31.0, 30.2, 27.5, 22.2, 14.0. HRMS (ESI):  $m/z$  calcd. for  $\text{C}_{33}\text{H}_{38}\text{O}_4\text{SNa}^+([\text{M}+\text{Na}]^+)$  = 553.2383, found = 553.2382.

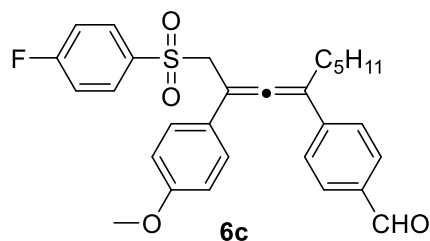

**4-(1-((4-fluorophenyl)sulfonyl)-2-(4-methoxyphenyl)nona-2,3-dien-4-yl)benzaldehyde (6c):** Pale yellow oil, 64.9 mg, isolated yield 66%.  $^1\text{H NMR}$  (400 MHz,  $\text{CDCl}_3$ )  $\delta$  9.98 (s, 1H), 7.84 – 7.77 (m, 4H), 7.48 (d,  $J = 8.0$  Hz, 2H), 7.23 (d,  $J = 8.8$  Hz, 2H), 7.03 (t,  $J = 8.4$  Hz, 2H), 6.81 (d,  $J = 8.8$  Hz, 2H), 4.39 – 4.29 (m, 2H), 3.79 (s, 3H), 2.53 – 2.39 (m, 2H), 1.55 – 1.44 (m, 2H), 1.35 – 1.27 (m, 4H), 0.85 (t,  $J = 6.8$  Hz, 3H).  $^{13}\text{C NMR}$  (100 MHz,  $\text{CDCl}_3$ )  $\delta$  210.3, 191.6, 165.7 (d,  $J = 255.0$  Hz), 159.3, 141.9, 135.3, 135.0 (d,  $J = 3.0$  Hz), 131.2 (d,  $J = 10.0$  Hz), 129.9, 127.4, 126.9, 125.5, 116.2 (d,  $J = 22.0$  Hz), 114.2, 110.0, 99.1, 58.4, 55.3, 31.6, 30.4, 27.5, 22.4, 14.0. HRMS (ESI):  $m/z$  calcd. for  $\text{C}_{29}\text{H}_{29}\text{FO}_4\text{SNa}^+([\text{M}+\text{Na}]^+)$  = 515.1663, found = 515.1656.

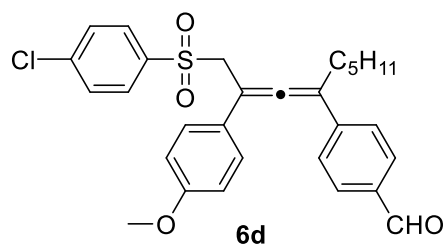

**4-(1-((4-chlorophenyl)sulfonyl)-2-(4-methoxyphenyl)nona-2,3-dien-4-yl)benzaldehyde (6d):** Pale yellow oil, 70.1 mg, isolated yield 69%.  $^1\text{H NMR}$  (400 MHz,  $\text{CDCl}_3$ )  $\delta$  9.99 (s, 1H), 7.81 (d,  $J = 8.4$  Hz, 2H), 7.71 (d,  $J = 8.4$  Hz, 2H), 7.44 (d,  $J = 8.4$  Hz, 2H), 7.31 (d,  $J = 8.4$  Hz, 2H), 7.23 (d,  $J = 9.2$  Hz, 2H), 6.81 (d,  $J = 9.2$  Hz, 2H), 4.40 – 4.29 (m, 2H), 3.80 (s, 3H), 2.52 – 2.37 (m, 2H), 1.54 – 1.44 (m, 2H), 1.36 – 1.27 (m, 4H), 0.85 (t,  $J = 7.2$  Hz, 3H).  $^{13}\text{C NMR}$  (100 MHz,  $\text{CDCl}_3$ )  $\delta$  210.2, 191.6, 159.4, 141.9, 140.4, 137.3, 135.3, 130.0, 129.9, 129.3, 127.4, 126.9, 125.4, 114.2, 110.1, 99.1, 58.4, 55.3, 31.6, 30.4, 27.6, 22.4, 14.0. HRMS (ESI):  $m/z$  calcd. for  $\text{C}_{29}\text{H}_{30}\text{ClO}_4\text{S}^+([\text{M}+\text{H}]^+)$  = 509.1548, found = 509.1546.

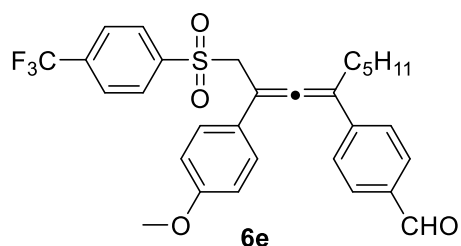

**4-(2-(4-methoxyphenyl)-1-((4-(trifluoromethyl)phenyl)sulfonyl)nona-2,3-dien-4-yl)benzaldehyde (6e):** Pale yellow oil, 64.0 mg, isolated yield 59%.  $^1\text{H NMR}$  (400 MHz,

CDCl<sub>3</sub>) δ 9.98 (s, 1H), 7.92 (d, *J* = 8.0 Hz, 2H), 7.81 (d, *J* = 8.4 Hz, 2H), 7.60 (d, *J* = 8.0 Hz, 2H), 7.50 (d, *J* = 8.8 Hz, 2H), 7.18 (d, *J* = 8.8 Hz, 2H), 6.77 (d, *J* = 8.8 Hz, 2H), 4.43 – 4.33 (m, 2H), 3.77 (s, 3H), 2.53 – 2.36 (m, 2H), 1.58 – 1.44 (m, 2H), 1.35 – 1.26 (m, 4H), 0.85 (t, *J* = 7.2 Hz, 3H). <sup>13</sup>C NMR (100 MHz, CDCl<sub>3</sub>) δ 210.2, 191.6, 159.3, 142.5, 141.7, 135.3, 135.2 (q, *J* = 34.0 Hz), 129.9, 129.0, 127.3, 126.9, 126.0 (q, *J* = 3.0 Hz), 125.3, 123.0 (q, *J* = 272.0 Hz), 114.2, 110.2, 98.8, 58.3, 55.2, 31.6, 30.3, 27.5, 22.4, 13.9. HRMS (ESI): *m/z* calcd. for C<sub>30</sub>H<sub>29</sub>F<sub>3</sub>O<sub>4</sub>SNa<sup>+</sup>([M+Na]<sup>+</sup>) = 565.1631, found = 565.1627.

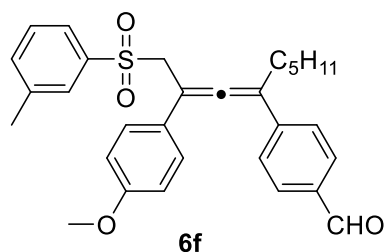

**4-(2-(4-methoxyphenyl)-1-(m-tolylsulfonyl)nona-2,3-dien-4-yl)benzaldehyde (6f):** Pale yellow oil, 67.3 mg, isolated yield 69%. <sup>1</sup>H NMR (400 MHz, CDCl<sub>3</sub>) δ 9.91 (s, 1H), 7.73 (d, *J* = 8.4 Hz, 2H), 7.57 (d, *J* = 6.8 Hz, 1H), 7.53 (s, 1H), 7.42 (d, *J* = 8.4 Hz,

2H), 7.27 – 7.20 (m, 2H), 7.17 (d, *J* = 9.2 Hz, 2H), 6.73 (d, *J* = 8.8 Hz, 2H), 4.31 – 4.20 (m, 2H), 3.71 (s, 3H), 2.45 – 2.30 (m, 2H), 2.24 (s, 3H), 1.49 – 1.35 (m, 2H), 1.29 – 1.20 (m, 4H), 0.78 (t, *J* = 6.8 Hz, 3H). <sup>13</sup>C NMR (100 MHz, CDCl<sub>3</sub>) δ 210.4, 191.7, 159.2, 142.0, 139.3, 139.0, 135.2, 134.4, 129.9, 128.9, 128.7, 127.4, 126.9, 125.8, 125.4, 114.1, 109.8, 99.3, 58.2, 55.3, 31.7, 30.3, 27.5, 22.4, 21.2, 14.0. HRMS (ESI): *m/z* calcd. for C<sub>30</sub>H<sub>33</sub>O<sub>4</sub>S<sup>+</sup>([M+H]<sup>+</sup>) = 489.2094, found = 489.2092.

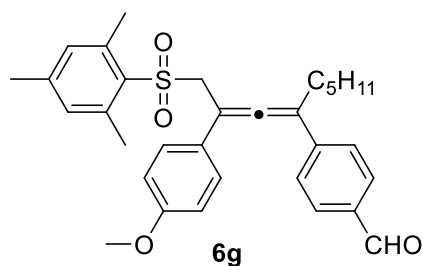

**4-(1-(mesitylsulfonyl)-2-(4-methoxyphenyl)nona-2,3-dien-4-yl)benzaldehyde (6g):** Pale yellow oil, 83.6 mg, isolated yield 81%. <sup>1</sup>H NMR (400 MHz, CDCl<sub>3</sub>) δ 9.97 (s, 1H), 7.78 (d, *J* = 8.4 Hz, 2H), 7.47 (d, *J* =

8.4 Hz, 2H), 7.32 (d, *J* = 8.8 Hz, 2H), 6.82 (s, 3H), 6.80 (s, 1H), 4.39 – 4.29 (m, 2H), 3.78 (s, 3H), 2.56 (s, 6H), 2.48 – 2.34 (m, 2H), 2.22 (s, 3H), 1.53 – 1.44 (m, 2H), 1.33 – 1.25 (m, 4H), 0.85 (t, *J* = 6.8 Hz, 3H). <sup>13</sup>C NMR (100 MHz, CDCl<sub>3</sub>) δ 210.5, 191.6,

159.2, 143.2, 142.0, 140.3, 135.1, 133.2, 132.1, 129.9, 127.4, 126.9, 125.7, 114.0, 109.5, 99.5, 58.2, 55.2, 31.6, 30.2, 27.6, 22.9, 22.3, 20.9, 14.0. HRMS (ESI):  $m/z$  calcd. for  $C_{32}H_{36}O_4SNa^+([M+Na]^+)$  = 539.2227, found = 539.2220.

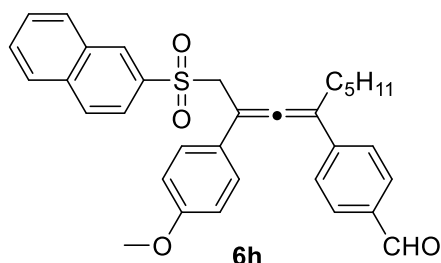

**4-(2-(4-methoxyphenyl)-1-(naphthalen-2-ylsulfonyl)nona-2,3-dien-4-yl)benzaldehyde**

**(6h):** Pale yellow oil, 77.6 mg, isolated yield 74%.

$^1H$  NMR (400 MHz,  $CDCl_3$ )  $\delta$  9.77 (s, 1H), 8.27 (d,  $J$  = 0.8 Hz, 1H), 7.77 – 7.70 (m, 3H), 7.67 (dd,  $J$  = 8.8, 1.2 Hz, 1H), 7.58 – 7.53 (m, 1H), 7.52 – 7.47 (m, 1H), 7.45 (d,  $J$  = 8.4 Hz, 2H), 7.23 – 7.17 (m, 4H), 6.69 (d,  $J$  = 8.8 Hz, 2H), 4.44 – 4.31 (m, 2H), 3.66 (s, 3H), 2.33 – 2.16 (m, 2H), 1.37 – 1.27 (m, 2H), 1.17 – 1.07 (m, 4H), 0.74 (t,  $J$  = 6.8 Hz, 3H).  $^{13}C$  NMR (100 MHz,  $CDCl_3$ )  $\delta$  210.1, 191.6, 159.2, 141.8, 135.6, 135.2, 135.0, 132.0, 130.4, 129.7, 129.4, 129.3, 129.2, 127.9, 127.5, 127.4, 126.6, 125.6, 122.8, 114.1, 109.9, 99.4, 58.0, 55.2, 31.6, 30.3, 27.5, 22.3, 14.0. HRMS (ESI):  $m/z$  calcd. for  $C_{33}H_{33}O_4S^+([M+H]^+)$  = 525.2094, found = 525.2091.

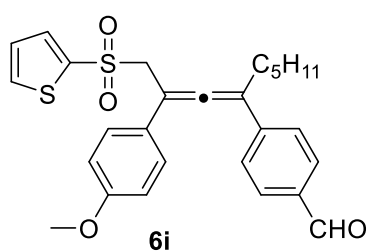

**4-(2-(4-methoxyphenyl)-1-(thiophen-2-ylsulfonyl)nona-2,3-dien-4-yl)benzaldehyde (6i):** Pale

yellow oil, 62.4 mg, isolated yield 65%.  $^1H$  NMR (400 MHz,  $CDCl_3$ )  $\delta$  9.91 (s, 1H), 7.75 (d,  $J$  = 8.4 Hz, 2H), 7.53 – 7.49 (m, 2H), 7.47 (d,  $J$  = 8.4 Hz, 2H), 7.18 (d,  $J$  = 8.8 Hz, 2H), 6.90 (dd,  $J$  = 4.8, 4.0 Hz, 1H), 6.74 (d,  $J$  = 8.8 Hz, 2H), 4.42 – 4.29 (m, 2H), 3.71 (s, 3H), 2.51 – 2.38 (m, 2H), 1.52 – 1.39 (m, 2H), 1.32 – 1.20 (m, 4H), 0.79 (t,  $J$  = 7.2 Hz, 3H).  $^{13}C$  NMR (100 MHz,  $CDCl_3$ )  $\delta$  210.6, 191.7, 159.2, 142.0, 140.0, 135.2, 134.7, 134.3, 130.0, 127.7, 127.3, 127.0, 125.7, 114.1, 110.1, 99.2, 59.6, 55.3, 31.7, 30.4, 27.6, 22.4, 14.0. HRMS (ESI):  $m/z$  calcd. for  $C_{27}H_{28}O_4S_2Na^+([M+Na]^+)$  = 503.1321, found = 503.1322.

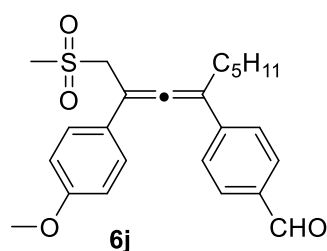

**4-(2-(4-methoxyphenyl)-1-(methylsulfonyl)nona-2,3-dien-4-yl)benzaldehyde (6j):** Pale yellow oil, 24.7 mg, isolated yield 30%.  $^1\text{H}$  NMR (400 MHz,  $\text{CDCl}_3$ )  $\delta$  9.98 (s, 1H), 7.85 (d,  $J = 8.4$  Hz, 2H), 7.63 (d,  $J = 8.4$  Hz, 2H), 7.41 (d,  $J = 8.8$  Hz, 2H), 6.91 (d,  $J = 9.2$  Hz, 2H), 4.27 – 4.14 (m, 2H), 3.81 (s, 3H), 2.79 (s, 3H), 2.67 – 2.60 (m, 2H), 1.69 – 1.54 (m, 2H), 1.42 – 1.27 (m, 4H), 0.86 (t,  $J = 6.8$  Hz, 3H).  $^{13}\text{C}$  NMR (100 MHz,  $\text{CDCl}_3$ )  $\delta$  210.0, 191.6, 159.6, 141.7, 135.4, 130.1, 127.5, 126.9, 125.8, 114.5, 110.6, 99.4, 56.9, 55.4, 40.8, 31.7, 30.4, 27.6, 22.4, 14.0. HRMS (ESI):  $m/z$  calcd. for  $\text{C}_{24}\text{H}_{29}\text{O}_4\text{S}^+([\text{M}+\text{H}]^+) = 413.1781$ , found = 413.1783.

## 5. General procedure for 3,4-sulfonylarylation of 1,3-enynes

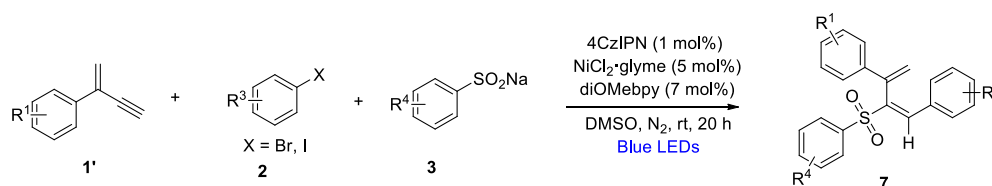

**General procedure :** A dry reaction tube equipped with a Teflon-coated magnetic stir bar was charged with 4CzIPN (1.6 mg, 0.002 mmol, 1 mol%),  $\text{NiCl}_2 \cdot \text{glyme}$  (2.2 mg, 0.01 mmol, 5 mol%), diOMebpy (3.0 mg, 0.014 mmol, 7 mol%), aryl halide (0.2 mmol, 1 equiv., if solid), sodium sulfinate (0.24 mmol, 1.2 equiv.) and 1,3-enyne (0.4 mmol, 2 equiv., if solid). It was capped with a rubber septum, evacuated and backfilled with argon. Then, degassed anhydrous DMSO (2.0 mL), aryl halide (0.2 mmol, 1 equiv., if liquid) and 1,3-enyne (0.4 mmol, 2 equiv., if liquid) were added via syringe. The reaction mixture was stirred at room temperature under 30 W blue LEDs irradiation for 20 hours. After the reaction completion, the reaction mixture was diluted with EtOAc, then washed with brine, dried over  $\text{Na}_2\text{SO}_4$ , filtered, and concentrated under reduced pressure. The residue was purified by column chromatography on silica gel (hexane/EtOAc) to afford the corresponding 1,3-diene products.

The analytical data of the products are summarized below.

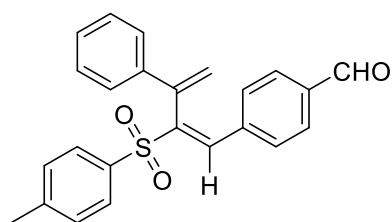

**7a**

**(E)-4-(3-phenyl-2-tosylbuta-1,3-dien-1-yl)benzaldehyde (7a):** Light yellow solid, 54.3 mg, isolated yield 70%.  $^1\text{H NMR}$  (400 MHz,  $\text{CDCl}_3$ )  $\delta$  9.94 (s, 1H), 8.03 (s, 1H), 7.74 (d,  $J = 8.4$  Hz, 2H), 7.70 – 7.66 (m, 4H), 7.22 – 7.14 (m, 7H), 5.91 (s, 1H), 5.18 (s, 1H), 2.36 (s, 3H).  $^{13}\text{C NMR}$  (100 MHz,  $\text{CDCl}_3$ )  $\delta$  191.4, 144.5, 144.3, 139.2, 138.4, 136.7, 136.7, 136.3, 135.1, 130.7, 129.7, 129.4, 129.1, 128.4, 128.4, 126.1, 120.9, 21.6. HRMS (ESI):  $m/z$  calcd. for  $\text{C}_{24}\text{H}_{21}\text{O}_3\text{S}^+([\text{M}+\text{H}]^+)$  = 389.1206, found = 389.1205.

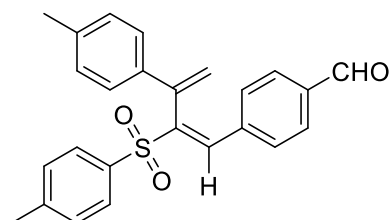

**7b**

**4-(3-(*p*-tolyl)-2-tosylbuta-1,3-dien-1-yl)benzaldehyde (7b):** Pale yellow oil, 56.3 mg, isolated yield 70%,  $E/Z = 14:1$ .  $^1\text{H NMR}$  (400 MHz,  $\text{CDCl}_3$ )  $\delta$  9.93 (s, 1H), 8.01 (s, 1H), 7.76 – 7.64 (m, 6H), 7.19 (d,  $J = 8.0$  Hz, 2H), 7.13 (d,  $J = 8.2$  Hz, 2H), 6.96 (d,  $J = 8.0$  Hz, 2H), 5.85 (s, 1H), 5.56 (s, 0.07H of *Z* isomer), 5.40 (s, 0.07H of *Z* isomer), 5.06 (s, 1H), 2.37 (s, 3H), 2.26 (s, 3H).  $^{13}\text{C NMR}$  (100 MHz,  $\text{CDCl}_3$ )  $\delta$  191.4, 144.4, 139.1, 138.5, 138.4, 136.7, 136.6, 135.1, 133.4, 130.7, 129.6, 129.4, 129.2, 129.1, 126.0, 119.8, 21.6, 21.1. HRMS (ESI):  $m/z$  calcd. for  $\text{C}_{25}\text{H}_{23}\text{O}_3\text{S}^+([\text{M}+\text{H}]^+)$  = 403.1362, found = 403.1360.

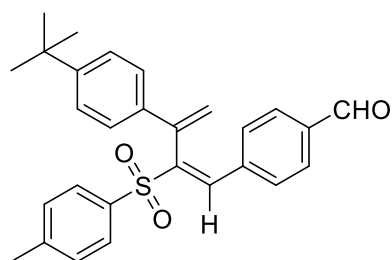

**7c**

**(E)-4-(3-(4-(*tert*-butyl)phenyl)-2-tosylbuta-1,3-dien-1-yl)benzaldehyde (7c):** Pale yellow oil, 48.8 mg, isolated yield 55%.  $^1\text{H NMR}$  (400 MHz,  $\text{CDCl}_3$ )  $\delta$  9.94 (s, 1H), 8.02 (s, 1H), 7.78 – 7.70 (m, 4H), 7.62 (d,  $J = 8.0$  Hz, 2H), 7.14 (s, 6H), 5.87 (s, 1H), 5.11 (s, 1H), 2.34 (s, 3H), 1.24 (s, 9H).  $^{13}\text{C NMR}$  (100 MHz,  $\text{CDCl}_3$ )  $\delta$  191.3, 151.5, 144.6, 144.2, 139.0, 138.5, 136.7, 136.5, 135.3, 133.2, 130.7,

129.7, 129.3, 129.1, 125.8, 125.3, 120.1, 34.4, 31.1, 21.5. HRMS (ESI):  $m/z$  calcd. for  $C_{28}H_{29}O_3S^+([M+H]^+) = 445.1832$ , found = 445.1836.

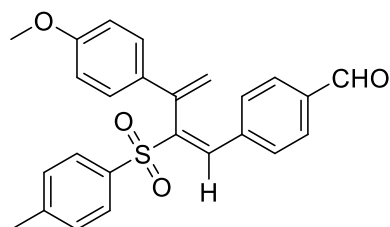

**7d**

**(E)-4-(3-(4-methoxyphenyl)-2-tosylbuta-1,3-dien-1-yl)benzaldehyde (7d):** Pale yellow oil, 64.4 mg, isolated yield 77%.  $^1H$  NMR (400 MHz,  $CDCl_3$ )  $\delta$  9.94 (s, 1H), 8.00 (s, 1H), 7.74 (d,  $J = 8.4$  Hz, 2H), 7.72 – 7.63 (m, 4H), 7.19 (t,  $J = 8.2$  Hz, 4H), 6.68 (d,  $J = 8.8$  Hz, 2H), 5.77 (s, 1H), 4.99 (s, 1H), 3.74 (s, 3H), 2.37 (s, 3H).  $^{13}C$  NMR (100 MHz,  $CDCl_3$ )  $\delta$  191.4, 159.8, 144.5, 144.4, 138.6, 138.5, 136.7, 136.5, 135.2, 130.7, 129.6, 129.4, 129.1, 128.8, 127.4, 118.6, 113.8, 55.2, 21.6. HRMS (ESI):  $m/z$  calcd. for  $C_{25}H_{23}O_4S^+([M+H]^+) = 419.1312$ , found = 419.1313.

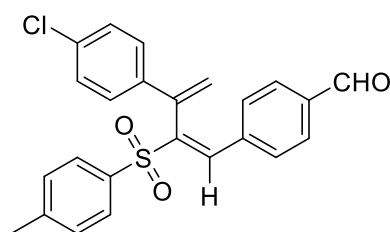

**7e**

**(E)-4-(3-(4-chlorophenyl)-2-tosylbuta-1,3-dien-1-yl)benzaldehyde (7e):** Pale yellow solid, 48.1 mg, isolated yield 57%.  $^1H$  NMR (400 MHz,  $CDCl_3$ )  $\delta$  9.95 (s, 1H), 8.02 (s, 1H), 7.75 (d,  $J = 8.4$  Hz, 2H), 7.66 (d,  $J = 8.4$  Hz, 4H), 7.20 (d,  $J = 7.6$  Hz, 2H), 7.16 – 7.09 (m, 4H), 5.90 (s, 1H), 5.18 (s, 1H), 2.39 (s, 3H).  $^{13}C$  NMR (100 MHz,  $CDCl_3$ )  $\delta$  191.3, 144.8, 143.8, 138.2, 138.2, 137.0, 136.9, 135.0, 134.8, 134.4, 130.6, 129.7, 129.5, 129.1, 128.7, 127.4, 121.4, 21.6. HRMS (ESI):  $m/z$  calcd. for  $C_{24}H_{20}ClO_3S^+([M+H]^+) = 423.0816$ , found = 423.0817.

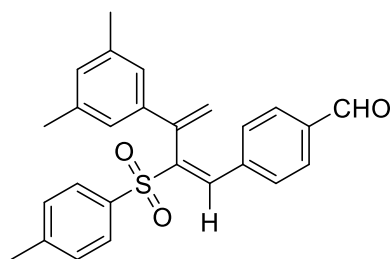

**7f**

**(E)-4-(3-(3,5-dimethylphenyl)-2-tosylbuta-1,3-dien-1-yl)benzaldehyde (7f):** Pale yellow oil, 52.4 mg, isolated yield 63%.  $^1H$  NMR (400 MHz,  $CDCl_3$ )  $\delta$  9.94 (s, 1H), 8.01 (s, 1H), 7.77 – 7.64 (m, 6H), 7.16 (d,  $J = 7.6$  Hz, 2H), 6.81 – 6.77 (m, 3H), 5.88 (d,  $J = 0.8$  Hz, 1H), 5.15 (d,  $J = 0.8$  Hz, 1H), 2.36 (s, 3H), 2.15

(d,  $J = 0.8$  Hz, 6H).  $^{13}\text{C}$  NMR (100 MHz,  $\text{CDCl}_3$ )  $\delta$  191.4, 144.7, 144.3, 139.3, 138.5, 137.8, 136.7, 136.7, 136.1, 135.5, 130.7, 130.1, 129.6, 129.3, 129.0, 124.0, 120.6, 21.5, 21.1. HRMS (ESI):  $m/z$  calcd. for  $\text{C}_{26}\text{H}_{25}\text{O}_3\text{S}^+([\text{M}+\text{H}]^+) = 417.1519$ , found = 417.1520.

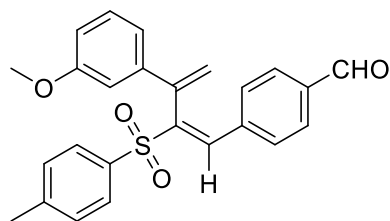

**7g**

**(E)-4-(3-(3-methoxyphenyl)-2-tosylbuta-1,3-dien-1-yl)benzaldehyde (7g):** Pale yellow oil, 24.2 mg, isolated yield 29%.  $^1\text{H}$  NMR (400 MHz,  $\text{CDCl}_3$ )  $\delta$  9.94 (s, 1H), 8.02 (s, 1H), 7.75 (d,  $J = 8.4$  Hz, 2H), 7.72 – 7.63 (m, 4H), 7.18 (d,  $J = 8.0$  Hz, 2H), 7.07 (t,  $J = 8.4$

Hz, 1H), 6.85 – 6.80 (m, 1H), 6.75 – 6.68 (m, 2H), 5.91 (s, 1H), 5.19 (s, 1H), 3.68 (s, 3H), 2.37 (s, 3H).  $^{13}\text{C}$  NMR (100 MHz,  $\text{CDCl}_3$ )  $\delta$  191.4, 159.6, 144.5, 144.3, 139.1, 138.5, 137.7, 136.8, 135.2, 130.7, 129.7, 129.5, 129.4, 129.1, 121.3, 118.8, 113.8, 112.0, 55.1, 21.6. HRMS (ESI):  $m/z$  calcd. for  $\text{C}_{25}\text{H}_{23}\text{O}_4\text{S}^+([\text{M}+\text{H}]^+) = 419.1312$ , found = 419.1311.

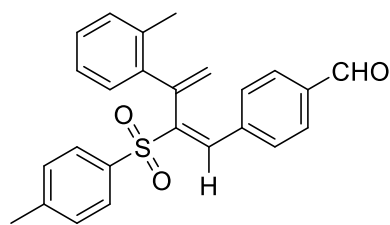

**7h**

**(E)-4-(3-(o-tolyl)-2-tosylbuta-1,3-dien-1-yl)benzaldehyde (7h):** Pale yellow oil, 32.2 mg, isolated yield 40%.  $^1\text{H}$  NMR (400 MHz,  $\text{CDCl}_3$ )  $\delta$  9.98 (s, 1H), 7.97 (s, 1H), 7.86 – 7.76 (m, 4H), 7.50 (d,  $J = 8.0$  Hz, 2H), 7.14 – 7.02 (m, 4H), 6.89 – 6.80 (m, 2H),

5.64 (d,  $J = 1.0$  Hz, 1H), 5.56 (d,  $J = 1.0$  Hz, 1H), 2.35 (s, 3H), 2.34 (s, 3H).  $^{13}\text{C}$  NMR (100 MHz,  $\text{CDCl}_3$ )  $\delta$  191.3, 146.5, 144.1, 138.9, 138.3, 137.0, 136.8, 136.6, 136.1, 136.0, 131.3, 130.5, 129.6, 129.3, 128.6, 128.4, 127.8, 126.3, 125.6, 21.5, 21.0. HRMS (ESI):  $m/z$  calcd. for  $\text{C}_{25}\text{H}_{23}\text{O}_3\text{S}^+([\text{M}+\text{H}]^+) = 403.1362$ , found = 403.1360.



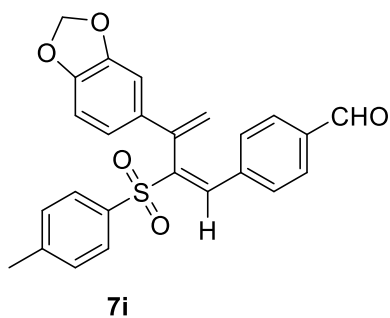

**(E)-4-(3-(benzo[*d*][1,3]dioxol-5-yl)-2-tosylbuta-1,3-dien-1-yl)benzaldehyde (7i):** Pale yellow oil, 45.8 mg, isolated yield 53%. <sup>1</sup>H NMR (400 MHz, CDCl<sub>3</sub>) δ 9.95 (s, 1H), 7.99 (s, 1H), 7.80 – 7.73 (m, 2H), 7.72 – 7.60 (m, 4H), 7.22 (d, *J* = 8.0 Hz, 2H), 6.77 – 6.68 (m, 2H), 6.57 (d, *J* = 8.0 Hz, 1H), 5.90 (s, 2H), 5.75 (s, 1H), 4.99 (s, 1H), 2.38 (s, 3H). <sup>13</sup>C NMR (100 MHz, CDCl<sub>3</sub>) δ 191.3, 147.9, 144.5, 144.4, 138.7, 138.3, 136.8, 136.7, 135.1, 130.7, 130.5, 129.7, 129.4, 129.1, 120.6, 119.2, 108.1, 106.2, 101.2, 21.6. HRMS (ESI): *m/z* calcd. for C<sub>25</sub>H<sub>21</sub>O<sub>5</sub>S<sup>+</sup>([M+H]<sup>+</sup>) = 433.1104, found = 433.1108.

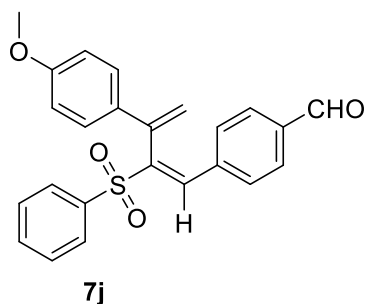

**(E)-4-(3-(4-methoxyphenyl)-2-(phenylsulfonyl)buta-1,3-dien-1-yl)benzaldehyde (7j):** Pale yellow oil, 46.1 mg, isolated yield 57%. <sup>1</sup>H NMR (400 MHz, CDCl<sub>3</sub>) δ 9.94 (s, 1H), 8.03 (s, 1H), 7.81 (dd, *J* = 8.4, 1.2 Hz, 2H), 7.76 – 7.69 (m, 4H), 7.55 – 7.50 (m, 1H), 7.41 (t, *J* = 7.6 Hz, 2H), 7.17 (d, *J* = 8.8 Hz, 2H), 6.68 (d, *J* = 8.8 Hz, 2H), 5.79 (s, 1H), 5.00 (s, 1H), 3.73 (s, 3H). <sup>13</sup>C NMR (100 MHz, CDCl<sub>3</sub>) δ 191.4, 159.8, 144.2, 138.5, 138.4, 138.2, 137.0, 136.8, 133.4, 130.7, 129.7, 129.1, 128.8, 128.6, 127.4, 118.8, 113.9, 55.2. HRMS (ESI): *m/z* calcd. for C<sub>24</sub>H<sub>20</sub>O<sub>4</sub>SNa<sup>+</sup>([M+Na]<sup>+</sup>) = 427.0975, found = 427.0972.

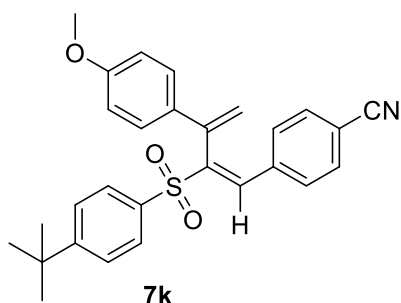

**(E)-4-(2-((4-(tert-butyl)phenyl)sulfonyl)-3-(4-methoxyphenyl)buta-1,3-dien-1-yl)benzaldehyde (7k):** Pale yellow oil, 46.0 mg, isolated yield 50%. <sup>1</sup>H NMR (400 MHz, CDCl<sub>3</sub>) δ 7.89 (s, 1H), 7.60 (d, *J* = 8.6 Hz, 2H), 7.57 (d, *J* = 8.4 Hz, 2H), 7.45 (d, *J* = 8.4 Hz, 2H), 7.29 (d, *J* = 8.6 Hz, 2H), 7.00 (d, *J* = 8.8 Hz, 2H), 6.55 (d, *J* = 8.8 Hz, 2H), 5.75 (s, 1H), 5.04 (s, 1H), 3.65 (s, 3H), 1.20 (s, 9H). <sup>13</sup>C

NMR (100 MHz, CDCl<sub>3</sub>) δ 159.7, 157.5, 145.1, 138.3, 137.2, 135.5, 134.9, 132.2, 130.5, 129.0, 128.5, 127.3, 125.8, 118.8, 118.2, 113.8, 113.3, 55.1, 35.1, 31.0. HRMS (ESI): m/z calcd. for C<sub>28</sub>H<sub>28</sub>NO<sub>3</sub>S<sup>+</sup>([M+H]<sup>+</sup>) = 458.1784, found = 458.1786.

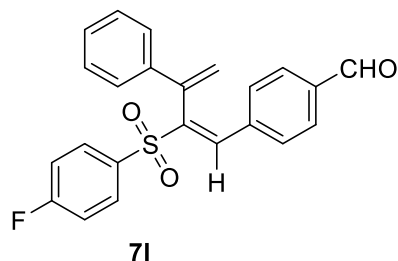

**(E)-4-(2-((4-fluorophenyl)sulfonyl)-3-phenylbuta-1,3-dien-1-yl)benzaldehyde (7l):** Pale yellow oil, 49.3 mg, isolated yield 63%. <sup>1</sup>H NMR (400 MHz, CDCl<sub>3</sub>) δ 9.88 (s, 1H), 7.98 (s, 1H), 7.77 – 7.58 (m, 6H), 7.17 – 7.03 (m, 5H), 6.97 (t, *J* = 8.6 Hz, 2H), 5.89

(s, 1H), 5.18 (s, 1H). <sup>13</sup>C NMR (100 MHz, CDCl<sub>3</sub>) δ 191.3, 165.6 (d, *J* = 255.0 Hz), 143.8, 139.1, 138.1, 137.2, 136.9, 136.0, 134.2 (d, *J* = 3.0 Hz), 131.9 (d, *J* = 10.0 Hz), 130.7, 129.7, 128.6, 128.6, 126.0, 121.3, 116.1 (d, *J* = 22.0 Hz). HRMS (ESI): m/z calcd. for C<sub>23</sub>H<sub>17</sub>FO<sub>3</sub>SNa<sup>+</sup>([M+Na]<sup>+</sup>) = 415.0775, found = 415.0773.

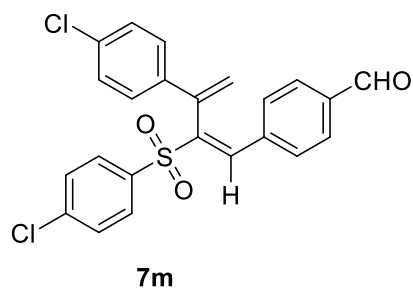

**(E)-4-(3-(4-chlorophenyl)-2-((4-chlorophenyl)sulfonyl)buta-1,3-dien-1-yl)benzaldehyde (7m):** Pale yellow solid, 40.7 mg, isolated yield 46%. <sup>1</sup>H NMR (400 MHz, CDCl<sub>3</sub>) δ

9.96 (s, 1H), 8.04 (s, 1H), 7.77 (d, *J* = 8.4 Hz, 2H), 7.72 (d, *J* = 8.8 Hz, 2H), 7.68 (d, *J* = 8.4 Hz, 2H), 7.40 (d, *J* = 8.8 Hz, 2H), 7.16 (s, 4H), 5.93 (s, 1H), 5.18 (s, 1H). <sup>13</sup>C NMR (100 MHz, CDCl<sub>3</sub>) δ 191.2, 143.1, 140.5, 138.1, 137.9, 137.8, 137.1, 136.5, 134.8, 134.5, 130.7, 130.5, 129.8, 129.2, 128.8, 127.3, 121.7. HRMS (ESI): m/z calcd. for C<sub>23</sub>H<sub>16</sub>Cl<sub>2</sub>O<sub>3</sub>SNa<sup>+</sup>([M+Na]<sup>+</sup>) = 465.0089, found = 465.0093.

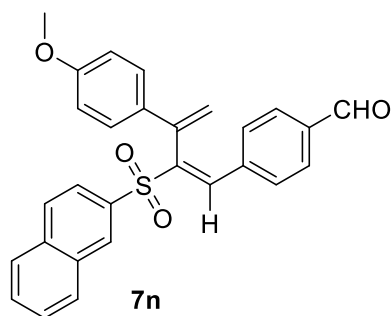

**7n**

**(E)-4-(3-(4-methoxyphenyl)-2-(naphthalen-2-ylsulfonyl)buta-1,3-dien-1-yl)benzaldehyde (7n):**

Pale yellow oil, 61.7 mg, isolated yield 68%. <sup>1</sup>H NMR (400 MHz, CDCl<sub>3</sub>) δ 9.95 (s, 1H), 8.31 (d, *J* = 2.0 Hz, 1H), 8.09 (s, 1H), 7.85 (d, *J* = 8.4 Hz, 3H), 7.79 – 7.71 (m, 5H), 7.66 – 7.54 (m, 2H), 7.15 (d, *J* = 9.2 Hz, 2H), 6.55 (d, *J* = 8.8 Hz, 2H), 5.75 (s, 1H), 4.98 (s, 1H), 3.61 (s, 3H). <sup>13</sup>C NMR (100 MHz, CDCl<sub>3</sub>) δ 191.4, 159.7, 144.4, 138.7, 138.4, 137.1, 136.9, 135.1, 135.1, 131.9, 131.2, 130.7, 129.7, 129.4, 129.2, 129.1, 128.6, 127.8, 127.4, 127.4, 123.5, 118.8, 113.8, 55.1. HRMS (ESI): *m/z* calcd. for C<sub>28</sub>H<sub>23</sub>O<sub>4</sub>S<sup>+</sup>([M+H]<sup>+</sup>) = 455.1312, found = 455.1311.

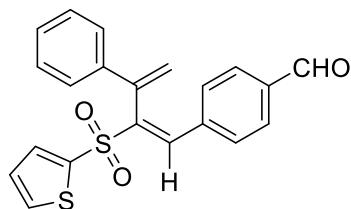

**7o**

**4-(3-phenyl-2-(thiophen-2-ylsulfonyl)buta-1,3-dien-1-yl)benzaldehyde (7o):**

Pale yellow oil, 45.6 mg, isolated yield 60%, *E/Z* = 11:1. <sup>1</sup>H NMR (400 MHz, CDCl<sub>3</sub>) δ 9.94 (s, 1H), 8.05 (s, 1H), 7.77 – 7.67 (m, 4H), 7.60 (dd, *J* = 5.0, 1.3 Hz, 1H), 7.53 (dd, *J* = 3.8, 1.3 Hz, 1H), 7.25 – 7.14 (m, 5H), 6.96 (dd, *J* = 4.9, 3.8 Hz, 1H), 6.03 (s, 1H), 5.71 (s, 0.09H of *Z* isomer), 5.57 (s, 0.09H of *Z* isomer), 5.39 (s, 1H). <sup>13</sup>C NMR (100 MHz, CDCl<sub>3</sub>) δ 191.3, 144.2, 139.2, 138.9, 138.3, 136.9, 136.8, 136.3, 135.6, 134.6, 130.8, 129.7, 128.6, 127.7, 125.9, 121.3. HRMS (ESI): *m/z* calcd. for C<sub>21</sub>H<sub>16</sub>O<sub>3</sub>S<sub>2</sub>Na<sup>+</sup>([M+Na]<sup>+</sup>) = 403.0433, found = 403.0427.

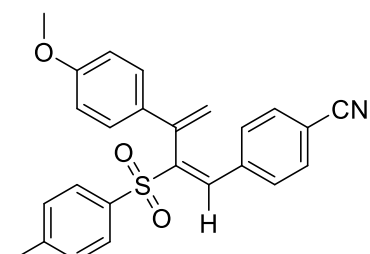

**7p**

**(E)-4-(3-(4-methoxyphenyl)-2-(tosyl)buta-1,3-dien-1-yl)benzotrile (7p):**

Pale yellow oil, 62.3 mg, isolated yield 75%. <sup>1</sup>H NMR (400 MHz, CDCl<sub>3</sub>) δ 7.95 (s, 1H), 7.66 (d, *J* = 8.0 Hz, 2H), 7.62 (d, *J* = 8.0 Hz, 2H), 7.51 (d, *J* = 8.4 Hz, 2H), 7.20 (d, *J* = 8.0 Hz, 2H), 7.15 (d, *J* = 8.8 Hz, 2H), 6.68 (d, *J* = 8.8 Hz, 2H), 5.77 (s, 1H), 4.97 (s, 1H), 3.74 (s, 3H), 2.37 (s, 3H). <sup>13</sup>C NMR (100 MHz, CDCl<sub>3</sub>) δ 159.9, 145.0,

144.6, 138.3, 137.1, 135.7, 134.9, 132.1, 130.5, 129.4, 129.1, 128.5, 127.4, 118.6, 118.2, 113.9, 113.2, 55.2, 21.5. HRMS (ESI):  $m/z$  calcd. for  $C_{25}H_{22}NO_3S^+([M+H]^+) = 416.1315$ , found = 416.1311.

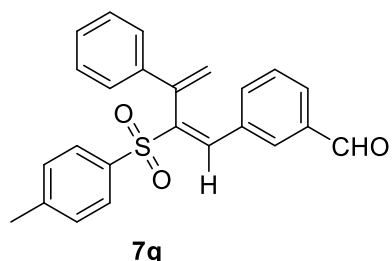

**(E)-3-(3-phenyl-2-tosylbuta-1,3-dien-1-yl)benzaldehyde (7q):** Pale yellow oil, 39.6 mg, isolated yield 51%.  $^1H$  NMR (400 MHz,  $CDCl_3$ )  $\delta$  9.87 (s, 1H), 8.04 (s, 1H), 8.00 (t,  $J = 1.6$  Hz, 1H), 7.77 (dd,  $J = 7.6, 2.0$  Hz, 2H), 7.69 (d,  $J = 8.4$  Hz, 2H), 7.40 (d,  $J = 8.0$  Hz, 1H), 7.25 – 7.07 (m, 7H), 5.93 (s, 1H), 5.21 (s, 1H), 2.37 (s, 3H).  $^{13}C$  NMR (100 MHz,  $CDCl_3$ )  $\delta$  191.4, 144.5, 143.1, 139.3, 136.7, 136.5, 136.4, 135.5, 135.3, 133.7, 131.7, 130.6, 129.5, 129.3, 129.1, 128.4, 128.3, 126.2, 121.0, 21.5. HRMS (ESI):  $m/z$  calcd. for  $C_{24}H_{20}O_3SNa^+([M+Na]^+) = 411.1025$ , found = 411.1027.

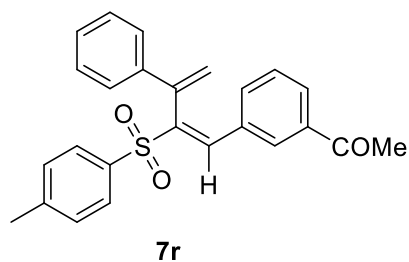

**(E)-1-(3-(3-phenyl-2-tosylbuta-1,3-dien-1-yl)phenyl)ethan-1-one (7r):** Pale yellow oil, 45.6 mg, isolated yield 57%.  $^1H$  NMR (400 MHz,  $CDCl_3$ )  $\delta$  7.92 – 7.91 (m, 1H), 7.86 (s, 1H), 7.70 – 7.65 (m, 1H), 7.54 – 7.50 (m, 3H), 7.16 (t,  $J = 7.8$  Hz, 1H), 7.10 – 7.06 (m, 2H), 7.04 – 6.95 (m, 5H), 5.76 (s, 1H), 4.98 (s, 1H), 2.23 (s, 3H), 2.19 (s, 3H).  $^{13}C$  NMR (100 MHz,  $CDCl_3$ )  $\delta$  197.3, 144.4, 142.4, 139.4, 137.3, 137.3, 136.3, 135.4, 134.4, 133.2, 130.4, 129.5, 129.4, 129.1, 128.9, 128.5, 128.4, 126.1, 120.6, 26.4, 21.6. HRMS (ESI):  $m/z$  calcd. for  $C_{25}H_{22}O_3SNa^+([M+Na]^+) = 425.1182$ , found = 425.1183.

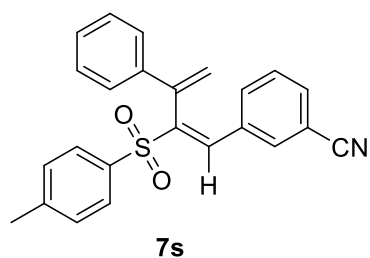

**(E)-3-(3-phenyl-2-tosylbuta-1,3-dien-1-yl)benzotrile (7s):** Pale yellow oil, 34.7 mg, isolated yield 45%.  $^1H$  NMR (400 MHz,  $CDCl_3$ )  $\delta$  7.95 (s, 1H), 7.79 (s, 1H), 7.72 (d,  $J = 8.0$  Hz, 1H), 7.67 (d,  $J = 8.3$

Hz, 2H), 7.53 (dt,  $J = 7.8, 1.3$  Hz, 1H), 7.34 (t,  $J = 7.9$  Hz, 1H), 7.22 – 7.09 (m, 7H), 5.92 (s, 1H), 5.21 (s, 1H), 2.37 (s, 3H).  $^{13}\text{C}$  NMR (100 MHz,  $\text{CDCl}_3$ )  $\delta$  144.6, 144.1, 139.0, 136.2, 135.5, 135.0, 134.1, 134.0, 133.3, 133.1, 129.5, 129.4, 129.2, 128.5, 128.5, 126.1, 121.2, 118.0, 113.0, 21.6. HRMS (ESI):  $m/z$  calcd. for  $\text{C}_{24}\text{H}_{20}\text{NO}_2\text{S}^+([\text{M}+\text{H}]^+) = 386.1209$ , found = 386.1210.

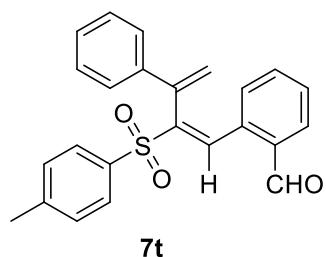

**(E)-2-(3-phenyl-2-tosylbuta-1,3-dien-1-yl)benzaldehyde**

**(7t):** Pale yellow oil, 52.0 mg, isolated yield 67%.  $^1\text{H}$  NMR (400 MHz,  $\text{CDCl}_3$ )  $\delta$  9.80 (s, 1H), 7.97 – 7.93 (m, 2H), 7.70 (dd,  $J = 7.4, 1.4$  Hz, 2H), 7.62 (d,  $J = 8.0$  Hz, 2H), 7.32 (t,  $J = 7.6$  Hz, 1H), 7.18 – 7.02 (m, 7H), 5.86 (s, 1H), 5.14 (s,

1H), 2.30 (s, 3H).  $^{13}\text{C}$  NMR (100 MHz,  $\text{CDCl}_3$ )  $\delta$  191.4, 144.5, 143.1, 139.3, 136.7, 136.5, 136.4, 135.5, 135.3, 133.7, 131.7, 130.6, 129.5, 129.3, 129.1, 128.4, 128.3, 126.2, 121.0, 21.5. HRMS (ESI):  $m/z$  calcd. for  $\text{C}_{24}\text{H}_{20}\text{O}_3\text{SNa}^+([\text{M}+\text{Na}]^+) = 411.1025$ , found = 411.1022.

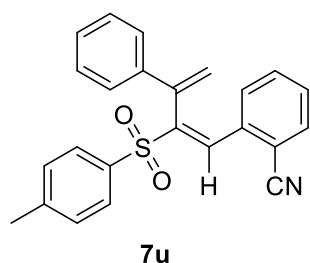

**(E)-2-(3-phenyl-2-tosylbuta-1,3-dien-1-yl)benzotrile**

**(7u):** Pale yellow oil, 44.7 mg, isolated yield 58%.  $^1\text{H}$  NMR (400 MHz,  $\text{CDCl}_3$ )  $\delta$  8.26 (s, 1H), 7.85 – 7.70 (m, 2H), 7.62 – 7.50 (m, 2H), 7.36 – 7.27 (m, 2H), 7.24 (d,  $J = 8.0$  Hz, 2H), 7.17 – 7.03 (m, 5H), 5.85 (s, 1H), 5.32 (s, 1H), 2.38 (s, 3H).

$^{13}\text{C}$  NMR (100 MHz,  $\text{CDCl}_3$ )  $\delta$  146.5, 144.7, 138.7, 136.9, 136.4, 135.0, 134.4, 132.9, 132.3, 129.6, 129.6, 129.2, 128.9, 128.4, 128.2, 126.1, 121.5, 116.9, 113.4, 21.5. HRMS (ESI):  $m/z$  calcd. for  $\text{C}_{24}\text{H}_{19}\text{NO}_2\text{SNa}^+([\text{M}+\text{Na}]^+) = 408.1029$ , found = 408.1028.

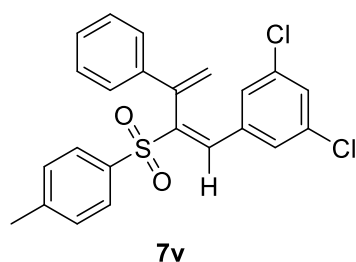

**(E)-1,3-dichloro-5-(3-phenyl-2-tosylbuta-1,3-dien-1-yl)benzene (7v):**

Pale yellow oil, 47.1 mg, isolated yield 55%.  $^1\text{H}$  NMR (400 MHz,  $\text{CDCl}_3$ )  $\delta$  7.84 (s, 1H), 7.68 (d,  $J = 8.4$  Hz, 2H), 7.37 (d,  $J = 2.0$  Hz, 2H), 7.25 – 7.08 (m,

8H), 5.90 (s, 1H), 5.23 (s, 1H), 2.37 (s, 3H).  $^{13}\text{C}$  NMR (100 MHz,  $\text{CDCl}_3$ )  $\delta$  144.6, 144.2, 139.0, 136.4, 135.5, 135.2, 135.0, 129.7, 129.5, 129.2, 128.4, 128.4, 128.2, 126.2, 121.3, 21.6. HRMS (ESI):  $m/z$  calcd. for  $\text{C}_{23}\text{H}_{18}\text{Cl}_2\text{O}_2\text{SNa}^+([\text{M}+\text{Na}]^+) = 451.0297$ , found = 451.0294.

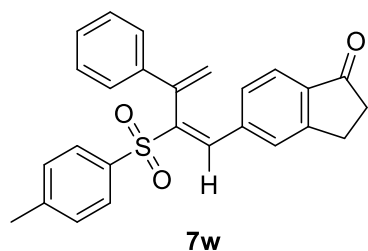

**(E)-5-(3-phenyl-2-tosylbuta-1,3-dien-1-yl)-2,3-dihydro-1H-inden-1-one (7w):** Pale yellow oil, 53.0 mg, isolated yield 64%.  $^1\text{H}$  NMR (400 MHz,  $\text{CDCl}_3$ )  $\delta$  8.04 (s, 1H), 7.67 (d,  $J = 8.4$  Hz, 2H), 7.61 (s, 1H), 7.59 – 7.51 (m, 2H), 7.22 – 7.11 (m, 7H), 5.90 (s, 1H), 5.21 (s, 1H), 3.04 – 2.99 (m, 2H), 2.66 – 2.60 (m, 2H), 2.36 (s, 3H).  $^{13}\text{C}$  NMR (100 MHz,  $\text{CDCl}_3$ )  $\delta$  206.1, 154.9, 144.5, 143.9, 139.3, 138.7, 137.8, 137.2, 136.5, 135.2, 129.4, 129.1, 128.4, 128.4, 128.3, 126.2, 123.6, 121.1, 36.3, 25.6, 21.5. HRMS (ESI):  $m/z$  calcd. for  $\text{C}_{26}\text{H}_{23}\text{O}_3\text{S}^+([\text{M}+\text{H}]^+) = 415.1362$ , found = 415.1361.

## 6. Scale-up syntheses and further transformations

### 6.1 Scale-up reactions

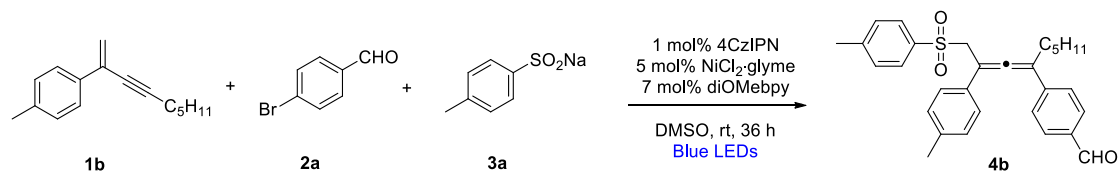

A dry reaction tube equipped with a Teflon-coated magnetic stir bar was charged with 4CzIPN (24 mg, 0.03 mmol, 1 mol%), NiCl<sub>2</sub>·glyme (33 mg, 0.15 mmol, 5 mol%), diOMebpy (45 mg, 0.21 mmol, 7 mol%), 4-bromobenzaldehyde **2a** (555 mg, 3.0 mmol, 1 equiv.), sodium *p*-methylbenzene sulfinate **3a** (641 mg, 3.6 mmol, 1.2 equiv.) and 1,3-enyne **1b** (1.272 g, 6.0 mmol, 2 equiv.). It was capped with a rubber septum, evacuated and backfilled with argon. Then, degassed DMSO (30 mL) was added via syringe. The reaction mixture was stirred at room temperature under 30 W blue LEDs irradiation for 36 hours. After the reaction completion, the reaction mixture was diluted with EtOAc, then washed with brine, dried over Na<sub>2</sub>SO<sub>4</sub>, filtered, and concentrated under reduced pressure. The residue was purified by column chromatography on silica gel (hexane/EtOAc) to afford the corresponding product **4b** (0.991 g, 70% yield) as light yellow solid.

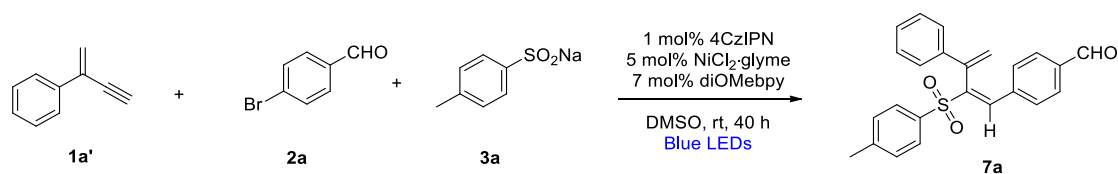

A dry reaction tube equipped with a Teflon-coated magnetic stir bar was charged with 4CzIPN (32 mg, 0.04 mmol, 1 mol%), NiCl<sub>2</sub>·glyme (44 mg, 0.2 mmol, 5 mol%), diOMebpy (60 mg, 0.28 mmol, 7 mol%), 4-bromobenzaldehyde **2a** (712 mg, 4.0 mmol, 1 equiv.) and sodium *p*-methylbenzene sulfinate **3a** (854 mg, 4.8 mmol, 1.2 equiv.). It was capped with a rubber septum, evacuated and backfilled with argon. Then, degassed

DMSO (40 mL) and 1,3-enyne **1a'** (1.024 g, 8 mmol, 2 equiv.) were added via syringe. The reaction mixture was stirred at room temperature under 30 W blue LEDs irradiation for 40 hours. After the reaction completion, the reaction mixture was diluted with EtOAc, then washed with brine, dried over Na<sub>2</sub>SO<sub>4</sub>, filtered, and concentrated under reduced pressure. The residue was purified by column chromatography on silica gel (hexane/EtOAc) to afford the corresponding product **7a** (0.950 g, 61% yield) as light yellow solid.

## 6.2 Further transformations

### Further transformations of $\alpha$ -allenyl sulfones:

(a)

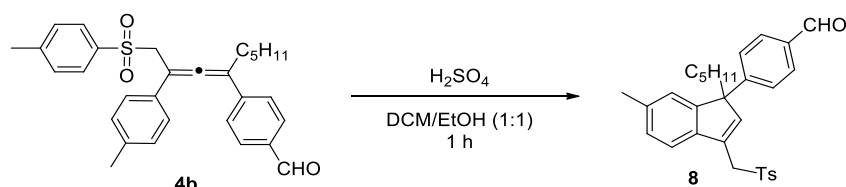

**Procedure** <sup>[2a]</sup>: 4-(2-(*p*-tolyl)-1-tosylnona-2,3-dien-4-yl)benzaldehyde **4b** (42.2 mg, 0.1 mmol, 1 equiv.) was dissolved in 1 mL DCM/EtOH (1:1), then 1 mL conc. H<sub>2</sub>SO<sub>4</sub> was added dropwise to the solution. The reaction mixture was stirred at room temperature for 1h. After quenching with 10 mL H<sub>2</sub>O, the mixture was extracted with ethyl acetate 3 times. The combined organic layers were washed with brine, dried over Na<sub>2</sub>SO<sub>4</sub> and concentrated under vacuum. The residue was purified by column chromatography to afford desired product **8** in 95% yield.

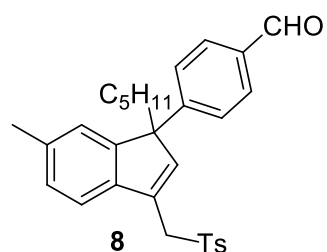

**4-(6-methyl-1-pentyl-3-(tosylmethyl)-1*H*-inden-1-yl)benzaldehyde (8)**: Pale yellow oil, 44.8 mg, isolated yield 95%. <sup>1</sup>H NMR (400 MHz, CDCl<sub>3</sub>)  $\delta$  9.88 (s, 1H), 7.66 (d,  $J = 8.4$  Hz, 2H), 7.56 (d,  $J = 8.4$  Hz, 2H), 7.24 (d,  $J = 8.4$  Hz, 2H), 7.11 – 7.04 (m, 3H), 6.96 (d,  $J = 7.6$  Hz, 1H), 6.91 (s, 1H), 6.17 (s, 1H), 4.35 – 4.24 (m, 2H), 2.29 (s, 3H), 2.26 (s, 3H), 2.21 – 2.08 (m, 1H), 1.84 – 1.72 (m, 1H), 1.22 – 1.00 (m, 6H), 0.74 (t,  $J = 6.8$  Hz, 3H). <sup>13</sup>C NMR (100



MHz, CDCl<sub>3</sub>)  $\delta$  191.7, 150.7, 149.4, 145.3, 144.7, 138.9, 136.2, 135.2, 134.9, 130.9, 129.8, 129.5, 128.5, 127.9, 127.1, 123.9, 120.2, 60.3, 55.7, 37.0, 32.3, 24.8, 22.4, 21.6, 14.0. HRMS (ESI):  $m/z$  calcd. for C<sub>30</sub>H<sub>32</sub>O<sub>3</sub>SNa<sup>+</sup>([M+Na]<sup>+</sup>) = 495.1964, found = 495.1957.

(b)

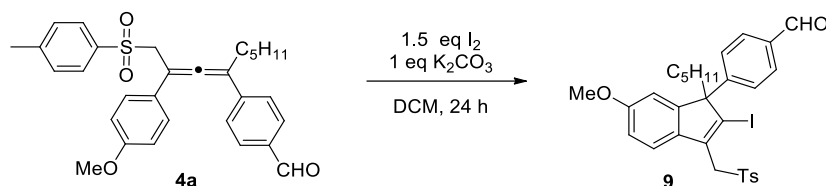

**Procedure** <sup>[2a]</sup>: To a dry sealed tube charged with a magnetic stir bar was added K<sub>2</sub>CO<sub>3</sub> (13.8 mg, 0.1 mmol, 1 equiv), 4-(2-(4-methoxyphenyl)-1-tosylnona-2,3-dien-4-yl)benzaldehyde **4a** (49 mg, 0.1 mmol, 1 equiv), I<sub>2</sub> (38 mg, 0.15 mmol, 1.5 equiv), and 1 mL DCM under inert atmosphere. The reaction mixture was stirred at room temperature for 24 h. After quenching with saturated sodium thiosulfate solution, the mixture was extracted with ethyl acetate 3 times. The combined organic layers were washed with brine, dried over Na<sub>2</sub>SO<sub>4</sub> and concentrated under vacuum. The residue was purified by column chromatography to afford desired product **9** in 38% yield.

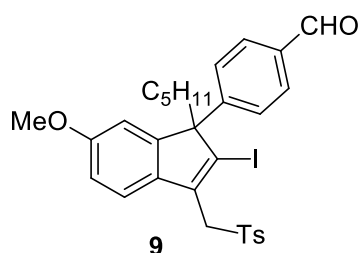

**4-(2-iodo-6-methoxy-1-pentyl-3-(tosylmethyl)-1H-inden-1-yl)benzaldehyde (9)**: Pale yellow oil, 23.3 mg, isolated yield 38%. <sup>1</sup>H NMR (400 MHz, CDCl<sub>3</sub>)  $\delta$  9.89 (s, 1H), 7.73 – 7.61 (m, 4H), 7.39 (d,  $J$  = 8.4 Hz, 1H), 7.14 (d,  $J$  = 8.0 Hz, 2H), 7.06 (d,  $J$  = 8.4 Hz, 2H), 6.73

(dd,  $J$  = 8.4, 2.4 Hz, 1H), 6.51 (d,  $J$  = 2.0 Hz, 1H), 4.42 (s, 2H), 3.68 (s, 3H), 2.32 (s, 3H), 2.11 – 2.03 (m, 2H), 1.18 – 1.04 (m, 6H), 0.75 (t,  $J$  = 7.2 Hz, 3H). <sup>13</sup>C NMR (125 MHz, CDCl<sub>3</sub>)  $\delta$  191.7, 156.0, 152.3, 148.5, 145.1, 136.5, 135.7, 135.2, 134.9, 129.9, 129.7, 128.9, 127.5, 121.6, 118.9, 112.1, 110.2, 64.5, 58.7, 55.5, 34.8, 31.9, 22.3, 22.2, 21.7, 14.0. HRMS (ESI):  $m/z$  calcd. for C<sub>30</sub>H<sub>31</sub>IO<sub>4</sub>SNa<sup>+</sup>([M+Na]<sup>+</sup>) = 637.0880, found = 637.0875.

(c)

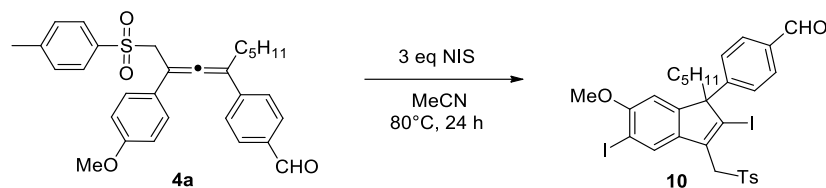

**Procedure**<sup>[2a]</sup>: To a 25 ml pressure tube charged with a magnetic stir bar was added NIS (67.5 mg, 0.3 mmol, 3 equiv), 1 mL CH<sub>3</sub>CN, and 4-(2-(4-methoxyphenyl)-1-tosylnona-2,3-dien-4-yl)benzaldehyde **4a** (49 mg, 0.1 mmol, 1 equiv) under inert atmosphere. The reaction mixture was stirred at 80 °C for 24 hours. After completion of the reaction, the mixture was concentrated under vacuum. The residue was purified by flash column chromatography to afford desired product **10** in 95% yield.

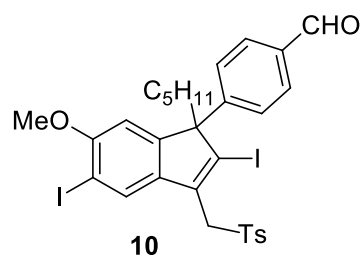

**4-(2,5-diiodo-6-methoxy-1-pentyl-3-(tosylmethyl)-1H-inden-1-yl)benzaldehyde (10)**: Pale yellow oil, 70.3 mg, isolated yield 95%. <sup>1</sup>H NMR (400 MHz, CDCl<sub>3</sub>) δ

9.91 (s, 1H), 7.71 – 7.62 (m, 4H), 7.36 (s, 1H), 7.18 (d, *J* = 8.0 Hz, 2H), 7.10 (d, *J* = 8.4 Hz, 2H), 6.40 (s, 1H), 4.37 (s, 2H), 3.68 (s, 3H), 2.36 (s, 3H), 2.21 – 2.04 (m, 2H), 1.22 – 1.07 (m, 6H), 0.77 (t, *J* = 6.8 Hz, 3H). <sup>13</sup>C NMR (100 MHz, CDCl<sub>3</sub>) δ 191.6, 157.0, 152.8, 147.8, 145.5, 136.4, 135.9, 135.5, 135.4, 130.8, 130.0, 129.9, 128.8, 127.5, 120.6, 106.3, 84.6, 64.8, 58.4, 56.6, 34.8, 31.9, 22.3, 22.2, 21.9, 14.0. HRMS (ESI): *m/z* calcd. for C<sub>30</sub>H<sub>30</sub>I<sub>2</sub>O<sub>4</sub>SNa<sup>+</sup> ([M+Na]<sup>+</sup>) = 762.9846, found = 762.9840.

(d)

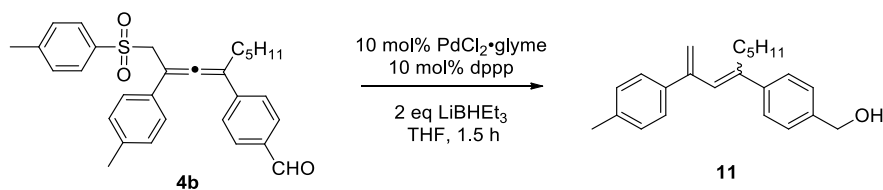

**Procedure**<sup>[4]</sup>: To a flame-dried 15 mL vial equipped with a stir bar was added PdCl<sub>2</sub> • glyme (5.2 mg, 0.02 mmol, 10 mol%) and 1,2-bis(diphenylphosphino)propane (8.0 mg, 0.02 mmol, 10 mol%) under argon, 0.5 mL DCM was added and the reaction mixture was stirred for 10 mins. The solvent was removed by sparging with argon, then a solution of 4-(2-(*p*-tolyl)-1-tosylnona-2,3-dien-4-yl)benzaldehyde **4b** (94.4 mg, 0.2 mmol, 1 equiv.) in 2 mL THF was added. Then 2 mL Super-Hydride® solution (1 M, 2 equiv.) was added dropwise, and the reaction was stirred for 1.5 h. After quenching by NaOH (2.5%), the mixture was extracted with DCM for three times. The combined organic layers were dried over Na<sub>2</sub>SO<sub>4</sub> and concentrated under vacuum. The residue was purified by column chromatography to afford desired product **11** in 51% yield.

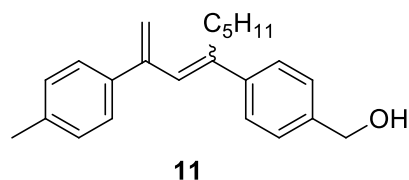

**(4-(2-(*p*-tolyl)nona-1,3-dien-4-yl)phenyl)methanol**

**(11)**: Pale yellow oil, 32.6 mg, isolated yield 51%. <sup>1</sup>H

NMR (400 MHz, CDCl<sub>3</sub>) δ 7.22 (d, *J* = 8.0 Hz, 2H),

7.13 – 7.04 (m, 4H), 7.01 (d, *J* = 8.0 Hz, 2H), 6.11 (d,

*J* = 1.2 Hz, 1H), 5.16 (d, *J* = 1.6 Hz, 1H), 4.69 (t, *J* = 1.6 Hz, 1H), 4.54 (s, 2H), 2.41 (t,

*J* = 6.4 Hz, 2H), 2.25 (s, 3H), 1.38 – 1.29 (m, 2H), 1.28 – 1.19 (m, 4H), 0.81 (t, *J* = 7.2

Hz, 3H). <sup>13</sup>C NMR (100 MHz, CDCl<sub>3</sub>) δ 144.5, 144.5, 140.5, 139.0, 138.0, 137.1, 128.8,

128.4, 126.7, 126.6, 126.3, 115.2, 77.3, 77.0, 76.7, 65.3, 39.5, 31.4, 27.7, 22.4, 21.1,

14.1. HRMS (ESI): *m/z* calcd. for C<sub>23</sub>H<sub>28</sub>ONa<sup>+</sup> ([M+Na]<sup>+</sup>) = 343.2032, found =

343.2031.

**Utilization of tert-butyl bromide as radical precursor:**

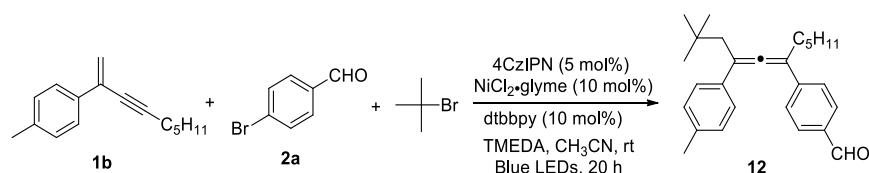

**Procedure:** A dry reaction tube equipped with a Teflon-coated magnetic stir bar was charged with 4CzIPN (3.9 mg, 0.005 mmol, 5 mol%), NiCl<sub>2</sub>·glyme (2.2 mg, 0.01

mmol, 10 mol%), dtbbpy (2.7 mg, 0.01 mmol, 10 mol%), **2a** (0.2 mmol, 36 mg, 2 equiv.) and 1,3-enyne **1b** (0.1 mmol, 22 mg, 1 equiv.). It was capped with a rubber septum, evacuated and backfilled with argon. Then, degassed anhydrous CH<sub>3</sub>CN (1.5 mL), tert-butyl bromide (0.25 mmol, 28 ul, 2.5 equiv.) and TMEDA (0.3 mmol, 45 ul, 3 equiv.) were added via syringe. The reaction mixture was stirred at room temperature under 30 W blue LEDs irradiation for 20 hours. After the reaction completion, the reaction mixture was filtered and concentrated under reduced pressure. The residue was purified by column chromatography on silica gel (hexane/EtOAc) to afford the product **12** in 67% yield.

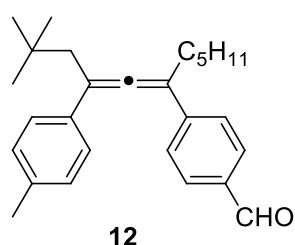

**4-(2,2-dimethyl-4-(*p*-tolyl)undeca-4,5-dien-6-yl)benzaldehyde (**12**):** Pale yellow liquid, 25.0 mg, isolated yield 67%.

<sup>1</sup>H NMR (400 MHz, CD<sub>3</sub>CN) δ 9.94 (s, 1H), 7.83 (d, *J* = 8.8 Hz, 2H), 7.61 (d, *J* = 8.4 Hz, 2H), 7.37 (d, *J* = 8.4 Hz, 2H), 7.14 (d, *J* = 8.0 Hz, 2H), 2.60 – 2.55 (m, 2H), 2.52 (s, 2H), 2.30 (s, 3H), 1.61 – 1.53 (m, 2H), 1.37 – 1.26 (m, 4H), 0.91 (s, 9H), 0.83 (t, *J* = 7.0 Hz, 3H). <sup>13</sup>C NMR (100 MHz, CD<sub>3</sub>CN) δ 209.5, 192.9, 144.7, 137.8, 135.9, 130.7, 130.1, 127.5, 127.3, 108.2, 107.4, 44.5, 32.7, 32.4, 31.0, 30.3, 28.6, 23.2, 21.0, 14.3. HRMS (ESI): *m/z* calcd. for C<sub>27</sub>H<sub>34</sub>ONa<sup>+</sup> ([M+Na]<sup>+</sup>) = 397.2507, found = 397.2506.

#### Further transformations of 1,3-dienyl sulfones:

(a)

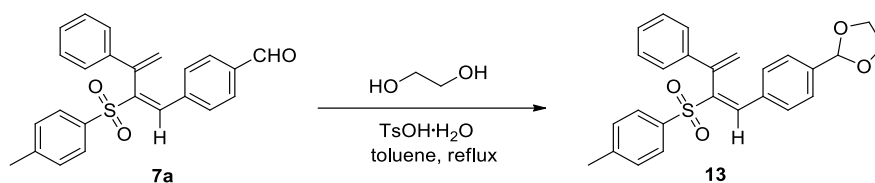

**Procedure:** In a round bottom flask were introduced substrate **7a** (388 mg, 1.0 mmol, 1 equiv.), toluene (20 mL), *p*-toluenesulfonic acid monohydrate (19 mg, 0.1 mmol, 10 mol%) and ethylene glycol (0.11 mL, 2.0 mmol, 2 equiv.). The reaction mixture was refluxed overnight. After cooling to room temperature, the mixture was washed with

brine, dried over Na<sub>2</sub>SO<sub>4</sub> and concentrated under vacuum. The product **13** was obtained in 92% yield.

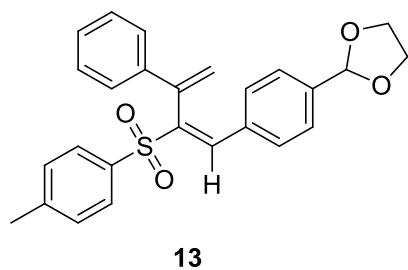

**(E)-2-(4-(3-phenyl-2-tosylbuta-1,3-dien-1-yl)phenyl)-1,3-dioxolane (13):** Pale yellow solid, 396.0 mg, isolated yield 92%. <sup>1</sup>H NMR (400 MHz, CDCl<sub>3</sub>) δ 7.99 (s, 1H), 7.64 (d, *J* = 8.0 Hz, 2H), 7.58 (d, *J* = 8.4 Hz, 2H), 7.36 (d, *J* = 8.4 Hz, 2H), 7.26 –

7.24 (m, 2H), 7.17 – 7.14 (m, 5H), 5.88 (d, *J* = 0.8 Hz, 1H), 5.74 (s, 1H), 5.09 (d, *J* = 0.8 Hz, 1H), 4.08 – 3.97 (m, 4H), 2.35 (s, 3H). <sup>13</sup>C NMR (100 MHz, CDCl<sub>3</sub>) δ 144.1, 141.5, 140.0, 139.6, 138.0, 136.5, 135.6, 133.5, 130.5, 129.3, 129.0, 128.4, 128.2, 126.7, 126.2, 120.7, 103.0, 65.3, 21.5. HRMS (ESI): *m/z* calcd. for C<sub>26</sub>H<sub>24</sub>O<sub>4</sub>NaS<sup>+</sup>([M+Na]<sup>+</sup>) = 455.1288, found = 455.1286.

(b)

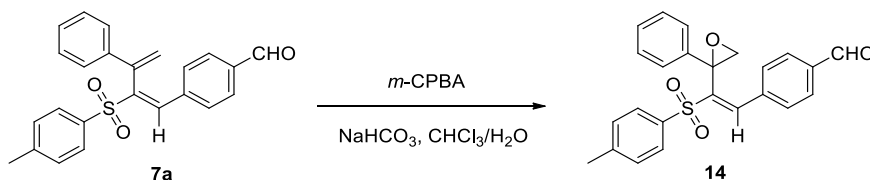

**Procedure:** To a 10 mL tube were added substrate **7a** (38.8 mg, 0.1 mmol, 1 equiv.), *m*-CPBA (25.9 mg, 0.15 mmol, 1.5 equiv.), NaHCO<sub>3</sub> (12.6 mg, 0.15 mmol, 1.5 equiv.) and CHCl<sub>3</sub>/H<sub>2</sub>O (v/v = 1/1, 1.0 mL). The resulting mixture was stirred at room temperature until **7a** was consumed as indicated by TLC. Then, the reaction was quenched by adding a solution of Na<sub>2</sub>S<sub>2</sub>O<sub>3</sub> in water and the mixture was extracted by DCM for three times. The combined organic layers were washed with brine, dried over Na<sub>2</sub>SO<sub>4</sub> and concentrated under vacuum. The residue was purified by column chromatography to afford the corresponding product **14** in 73% yield.

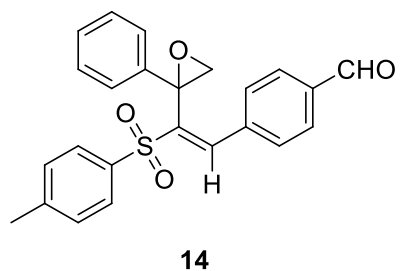

**(E)-4-(2-(2-phenyloxiran-2-yl)-2-tosylvinyl)benzaldehyde (14):** Pale yellow oil, 29.5 mg, isolated yield 73%.  $^1\text{H}$  NMR (400 MHz,  $\text{CDCl}_3$ )  $\delta$  9.99 (s, 1H), 8.17 (s, 1H), 7.83 (d,  $J = 8.4$  Hz, 2H), 7.76 (d,  $J = 8.4$  Hz, 2H), 7.65 (d,  $J = 8.4$  Hz, 2H), 7.28

– 7.26 (m, 5H), 7.24 – 7.21 (m, 2H), 3.03 (d,  $J = 5.2$  Hz, 1H), 2.84 (d,  $J = 5.6$  Hz, 1H), 2.39 (s, 3H).  $^{13}\text{C}$  NMR (100 MHz,  $\text{CDCl}_3$ )  $\delta$  191.2, 144.6, 142.3, 141.4, 137.7, 137.6, 137.1, 136.4, 131.0, 129.8, 129.6, 128.6, 128.4, 125.7, 59.3, 56.0, 21.6. HRMS (ESI):  $m/z$  calcd. for  $\text{C}_{24}\text{H}_{20}\text{O}_4\text{NaS}^+([\text{M}+\text{Na}]^+) = 427.0975$ , found = 427.0978.

(c)

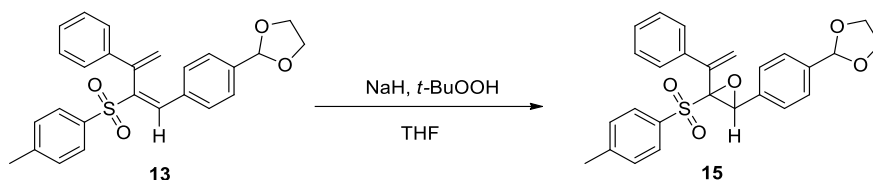

**Procedure:** A 10 mL tube was charged with anhydrous THF (2.0 mL) and oil free NaH (19.2 mg, 0.8 mmol, 4 equiv., washed with hexane). The mixture was cooled to 0 °C and then *t*-BuOOH (0.16 mL, 0.8 mmol, 4 equiv., 5.0 M in decane) was added. After stirring at room temperature for 30 mins, the resulting solution was cooled to 0 °C and a solution of **13** (86.4 mg, 0.2 mmol, 1 equiv.) in anhydrous THF (2.0 mL) was added dropwise. The reaction mixture was stirred at 0 °C until **13** was consumed as indicated by LCMS. Then, the reaction was quenched by adding a solution of  $\text{Na}_2\text{S}_2\text{O}_3$  in water and the mixture was extracted by ethyl acetate. The combined organic layers were washed with brine, dried over  $\text{Na}_2\text{SO}_4$  and concentrated under vacuum. The residue was purified by column chromatography to afford the corresponding product **15** in 76% yield.

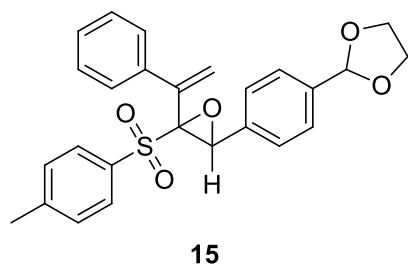

**2-(4-(3-(1-phenylvinyl)-3-tosyloxiran-2-yl)phenyl)-1,3-dioxolane (15):** Colorless oil, 68.4 mg, isolated yield 76%.  $^1\text{H}$  NMR (400 MHz,  $\text{CDCl}_3$ )  $\delta$  7.70 (d,  $J = 8.4$  Hz, 2H), 7.35 (d,  $J = 8.0$  Hz, 2H), 7.28 (d,  $J = 8.4$  Hz, 2H), 7.24 (d,  $J = 8.4$  Hz, 2H),

7.15 – 7.12 (m, 5H), 5.72 – 5.71 (m, 2H), 5.17 (s, 1H), 5.14 (s, 1H), 4.07 – 3.97 (m, 4H), 2.43 (s, 3H).  $^{13}\text{C}$  NMR (100 MHz,  $\text{CDCl}_3$ )  $\delta$  145.3, 138.7, 136.2, 135.5, 132.9, 132.3, 130.0, 129.4, 128.1, 128.0, 127.0, 126.5, 126.3, 123.5, 103.1, 79.9, 65.2, 62.2, 21.7. HRMS (ESI):  $m/z$  calcd. for  $\text{C}_{26}\text{H}_{24}\text{O}_5\text{NaS}^+([\text{M}+\text{Na}]^+)$  = 471.1237, found = 471.1235.

(d)

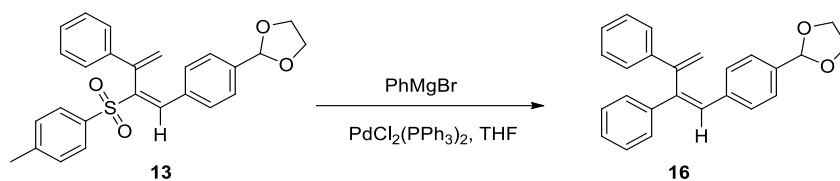

**Procedure:** Under argon atmosphere, **13** (43.2 mg, 0.1 mmol, 1 equiv.),  $\text{PdCl}_2(\text{PPh}_3)_2$  (7.0 mg, 0.01 mmol, 0.1 equiv.), and anhydrous THF (2.0 mL) were charged in a flask and cooled to 0 °C. Then, phenyl magnesium bromide (3M in  $\text{Et}_2\text{O}$ , 0.14 mL, 0.4 mmol, 4 equiv.) was added dropwise and stirred at 40 °C until **13** was consumed as indicated by TLC. Then, the reaction was quenched by water and the mixture was extracted by ethyl acetate. The combined organic layers were washed with brine, dried over  $\text{Na}_2\text{SO}_4$  and concentrated under vacuum. The residue was purified by column chromatography to afford the corresponding product **16** in 96% yield.

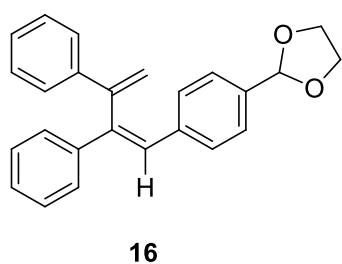

**(Z)-2-(4-(2,3-diphenylbuta-1,3-dien-1-yl)phenyl)-1,3-dioxolane (16):** Pale yellow oil, 34.0 mg, isolated yield 96%.  $^1\text{H}$  NMR (400 MHz,  $\text{CDCl}_3$ )  $\delta$  7.47 – 7.44 (m, 4H), 7.42 – 7.40 (m, 2H), 7.26 – 7.14 (m, 8H), 7.00 (s, 1H), 5.82 (d,  $J = 1.6$  Hz, 1H), 5.68 (s, 1H), 5.21 (d,  $J = 1.2$  Hz, 1H),

4.03 – 4.01 (m, 2H), 3.95 – 3.92 (m, 2H).  $^{13}\text{C}$  NMR (100 MHz,  $\text{CDCl}_3$ )  $\delta$  146.0, 142.5, 141.2, 138.6, 138.1, 136.5, 129.1, 129.0, 128.6, 128.4, 127.9, 127.6, 126.6, 126.5, 126.2, 116.9, 103.6, 65.3. HRMS (ESI):  $m/z$  calcd. for  $\text{C}_{25}\text{H}_{22}\text{O}_2\text{Na}^+$  ( $[\text{M}+\text{Na}]^+$ ) = 377.1512, found = 377.1516.

(e)

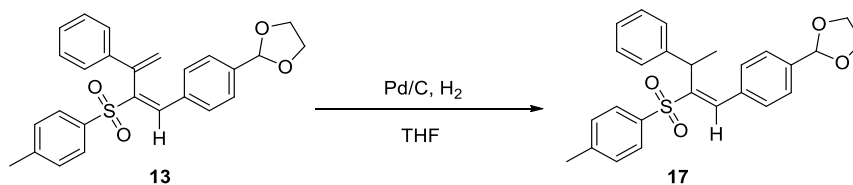

**Procedure:** A 10 mL tube was charged with **13** (43.2 mg, 0.1 mmol), THF (2.0 mL) and 10 % Pd/C (40 mg). Then the tube was filled with hydrogen gas using a balloon. The mixture was stirred at room temperature until the starting material was consumed as indicated by LCMS. After filtration, concentrated, the residue was purified by column chromatography to afford the corresponding product **17** in 56% yield.

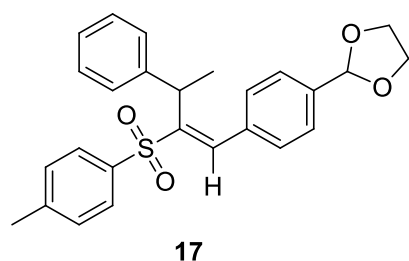

**(E)-2-(4-(3-phenyl-2-tosylbut-1-en-1-yl)phenyl)-1,3-dioxolane (17):** Pale yellow solid, 24.5 mg, isolated yield 56%.  $^1\text{H}$  NMR (500 MHz,  $\text{CDCl}_3$ )  $\delta$  8.01 (s, 1H), 7.52 (d,  $J = 8.5$  Hz, 2H), 7.39 (d,  $J = 8.5$  Hz, 2H), 7.19 (d,  $J = 8.0$  Hz, 2H), 7.16 (d,  $J = 8.0$  Hz,

2H), 7.05 – 7.04 (m, 3H), 6.99 – 6.98 (m, 2H), 5.77 (s, 1H), 4.39 (q,  $J = 7.5$  Hz, 1H), 4.12 – 4.09 (m, 2H), 4.04 – 4.01 (m, 2H), 2.38 (s, 3H), 1.55 (d,  $J = 7.5$  Hz, 3H).  $^{13}\text{C}$  NMR (125 MHz,  $\text{CDCl}_3$ )  $\delta$  147.6, 143.6, 140.6, 139.6, 138.6, 137.7, 134.6, 129.5, 129.0, 128.0, 127.9, 127.5, 126.5, 126.2, 103.1, 65.3, 37.0, 21.5, 18.0. HRMS (ESI):  $m/z$  calcd. for  $\text{C}_{26}\text{H}_{26}\text{O}_4\text{NaS}^+$  ( $[\text{M}+\text{Na}]^+$ ) = 457.1444, found = 457.1448.



## 7. Mechanistic experiments

### 7.1 Stern-Volmer quenching experiment

Stern-Volmer quenching experiments were carried out using stock solutions of photocatalyst 4CzIPN ( $1 \times 10^{-5}$  M), sodium *p*-methylbenzenesulfinate **3a** ( $6 \times 10^{-2}$  M), 4-bromobenzaldehyde **2a** ( $6 \times 10^{-2}$  M) and 1,3-enyne **1a** ( $6 \times 10^{-2}$  M) in anhydrous DMSO. In a gas-tight 3 mL quartz cuvette, samples were obtained by mixing a fix volume of the stock solution of photocatalyst 4CzIPN and variable amount of the substrate. Before the measurements, N<sub>2</sub> was bubbled into the solution for 10 mins. Then, samples were irradiated at 400 nm and emission spectras were recorded from wavelength 450 nm to 800 nm for each sample, as shown in the following figures.

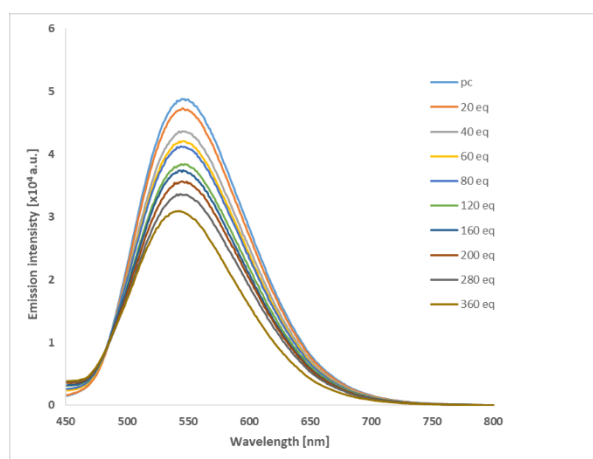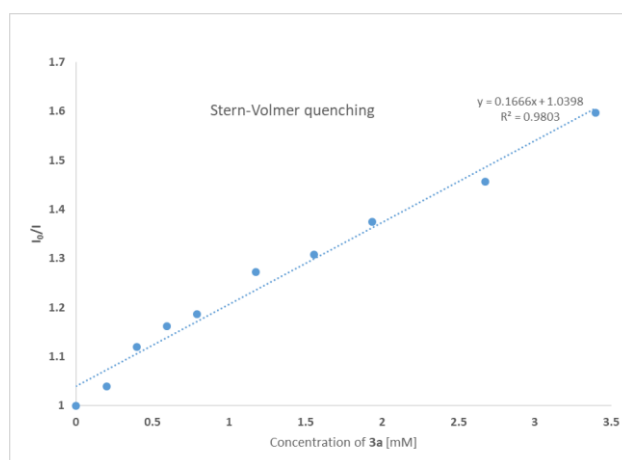

Figure S1: Fluorescence quenching of 4CzIPN with sodium *p*-methylbenzenesulfinate **3a**.

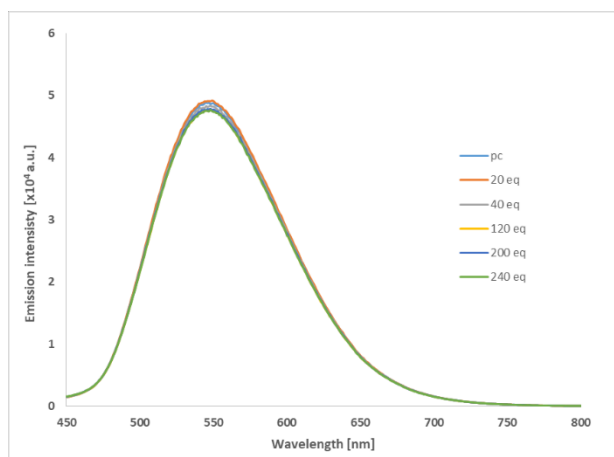

**Figure S2:** Fluorescence quenching of 4CzIPN with 4-bromobenzaldehyde **2a**.

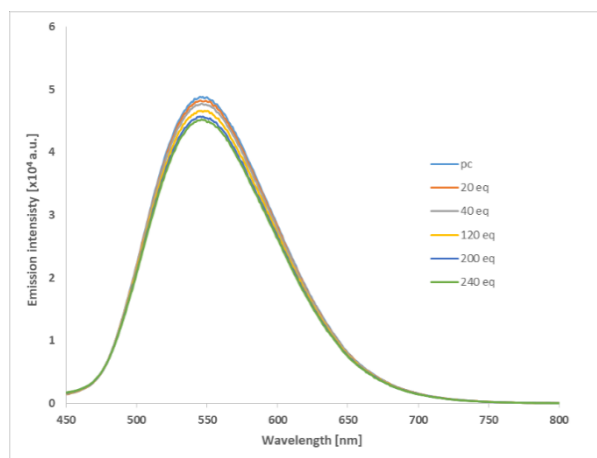

**Figure S3:** Fluorescence quenching of 4CzIPN with 1,3-enyne **1a**.

These experiments clearly show that only sodium *p*-methylbenzenesulfinate **3a** is an effective quencher of the fluorescence of 4CzIPN.

## 7.2 Radical trapping experiment

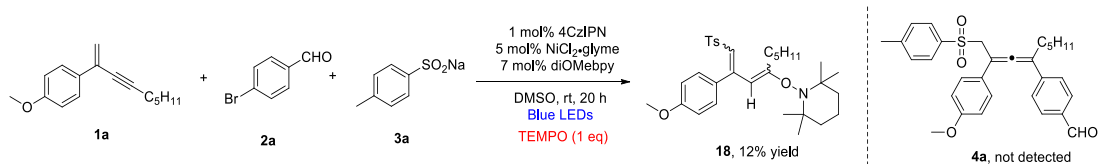

A dry reaction tube equipped with a Teflon-coated magnetic stir bar was charged with

4CzIPN (8 mg, 0.01 mmol, 1 mol%), NiCl<sub>2</sub>·glyme (11 mg, 0.05 mmol, 5 mol%), diOMebpy (15 mg, 0.07 mmol, 7 mol%), 4-bromobenzaldehyde **2a** (185 mg, 1.0 mmol, 1 equiv.), sodium *p*-methylbenzene sulfinate **3a** (214 mg, 1.2 mmol, 1.2 equiv.), TEMPO (156 mg, 1.0 mmol, 1 equiv.) and 1,3-enyne **1a** (456 mg, 2.0 mmol, 2 equiv.). It was capped with a rubber septum, evacuated and backfilled with argon. Then, degassed DMSO (10 mL) was added via syringe. The reaction mixture was stirred at room temperature under 30 W blue LEDs irradiation for 20 hours. Then the reaction mixture was diluted with EtOAc, then washed with brine, dried over Na<sub>2</sub>SO<sub>4</sub>, filtered, and concentrated under reduced pressure. Product **4a** was not detected by crude <sup>1</sup>H NMR analysis. The residue was purified by column chromatography on silica gel (hexane/EtOAc) to afford the diene product **18** (65.8 mg) in 12% yield.

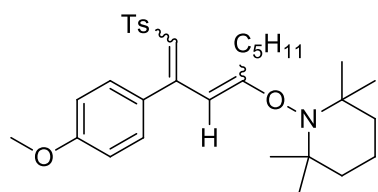

**1-((2-(4-methoxyphenyl)-1-tosylnona-1,3-dien-4-yl)oxy)-2,2,6,6-tetramethylpiperidine (**18**):** Colorless

oil, 65.8 mg, isolated yield 12%. <sup>1</sup>H NMR (400 MHz, CDCl<sub>3</sub>) δ 7.89 (d, *J* = 8.4 Hz, 2H), 7.31 (d, *J* = 8.0 Hz,

2H), 7.20 (d, *J* = 8.8 Hz, 2H), 6.99 (d, *J* = 1.2 Hz, 1H), 6.84 (d, *J* = 8.8 Hz, 2H), 5.96 (d, *J* = 1.2 Hz, 1H), 3.82 (s, 3H), 2.43 (s, 3H), 1.68 – 1.66 (m, 2H), 1.62 – 1.58 (m, 4H), 1.32 – 1.26 (m, 4H), 1.17 – 1.15 (m, 12H), 1.08 – 1.04 (m, 2H), 0.93 – 0.89 (m, 2H), 0.78 – 0.75 (m, 3H); <sup>13</sup>C NMR (100 MHz, CDCl<sub>3</sub>) δ 170.0, 160.6, 154.1, 143.3, 140.8, 134.4, 129.7, 129.5, 127.1, 121.4, 114.0, 99.6, 60.5, 55.5, 39.7, 32.4, 31.8, 31.5, 26.9, 22.3, 21.7, 20.9, 17.2, 14.0. HRMS (ESI): *m/z* calcd. for C<sub>32</sub>H<sub>46</sub>NO<sub>4</sub>S<sup>+</sup>([M+H]<sup>+</sup>) = 540.3142, found = 540.3138.

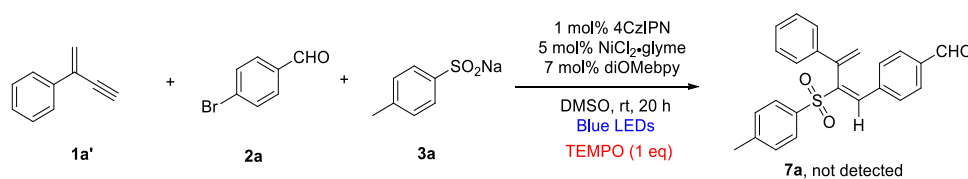

A dry reaction tube equipped with a Teflon-coated magnetic stir bar was charged with 4CzIPN (1.6 mg, 0.002 mmol, 1 mol%), NiCl<sub>2</sub>·glyme (2.2 mg, 0.01 mmol, 5 mol%), diOMebpy (3.0 mg, 0.014 mmol, 7 mol%), 4-bromobenzaldehyde **2a** (37 mg, 0.2 mmol, 1 equiv.) and sodium *p*-methylbenzene sulfinate **3a** (43 mg, 0.24 mmol, 1.2 equiv.). It was capped with a rubber septum, evacuated and backfilled with argon. Then, degassed DMSO (2.0 mL) and 1,3-enyne **1a'** (74 mg, 0.4 mmol, 2 equiv.) were added via syringe. The reaction mixture was stirred at room temperature under 30 W blue LEDs irradiation for 20 hours. Then the reaction mixture was diluted with EtOAc, then washed with brine, dried over Na<sub>2</sub>SO<sub>4</sub>, filtered, and concentrated under reduced pressure. Product **7a** was not detected by crude <sup>1</sup>H NMR analysis.

### 7.3 Control experiments

#### Synthesis of Ni-A<sup>[5]</sup>

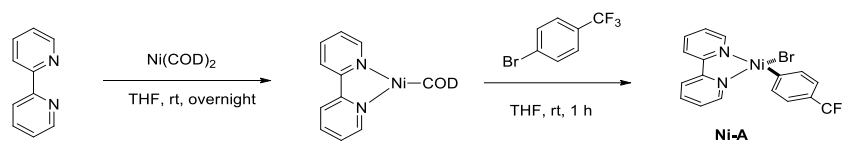

In an argon filled glove box, a 50 mL round bottom flash containing a stirring bar was charged with Ni(COD)<sub>2</sub> (276 mg, 1.0 mmol, 1.0 equiv.), 2,2'-dipyridy (156 mg, 1.0 mmol, 1.0 equiv.) and dry THF (10 mL). The dark purple mixture was stirred overnight at room temperature. Then 4-bromobenzotrifluoride (1.4 mL, 10 mmol, 10 equiv.) was added and stirred for additional 1 h. Dry pentane (20 mL) was added to the orange mixture and filtered. The resulting precipitate was washed with dry pentane (3 x 10 mL) and dried under vacuum to obtain Ni-A as an orange solid, which was used without further purification.

#### Stoichiometric experiment

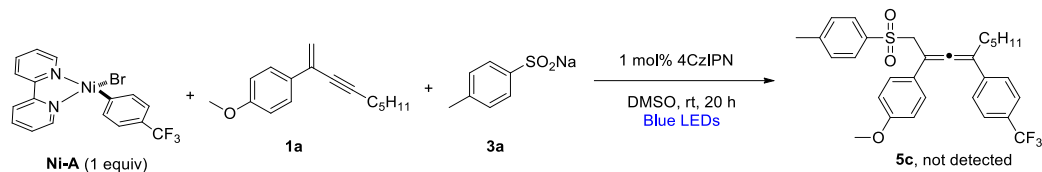

A dry reaction tube equipped with a Teflon-coated magnetic stir bar was charged with 4CzIPN (1.6 mg, 0.002 mmol, 1 mol%), sodium *p*-methylbenzene sulfinate **3a** (43 mg, 0.24 mmol, 1.2 equiv.), 1,3-enyne **1a** (91 mg, 0.4 mmol, 2 equiv.) and **Ni-A** (93.6 mg, 0.2 mmol, 1 equiv.). It was capped with a rubber septum, evacuated and backfilled with argon. Then, degassed DMSO (2.0 mL) was added via syringe. The reaction mixture was stirred at room temperature under 30 W blue LEDs irradiation for 20 hours. Then the reaction mixture was diluted with EtOAc, then washed with brine, dried over Na<sub>2</sub>SO<sub>4</sub>, filtered, and concentrated under reduced pressure. Product **5c** was not detected by crude <sup>1</sup>H NMR analysis.

### Catalytic reaction with Ni-A

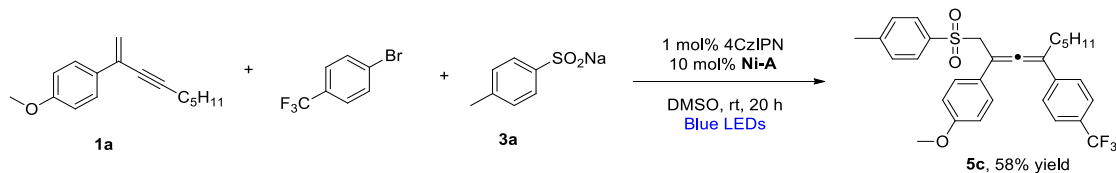

A dry reaction tube equipped with a Teflon-coated magnetic stir bar was charged with 4CzIPN (1.6 mg, 0.002 mmol, 1 mol%), sodium *p*-methylbenzene sulfinate **3a** (43 mg, 0.24 mmol, 1.2 equiv.), 1,3-enyne **1a** (91 mg, 0.4 mmol, 2 equiv.) and **Ni-A** (9.4 mg, 0.02 mmol, 10 mol%). It was capped with a rubber septum, evacuated and backfilled with argon. Then, degassed DMSO (2.0 mL) and 4-bromobenzotrifluoride (28  $\mu$ L, 0.2 mmol, 1.0 equiv.) were added via syringe. The reaction mixture was stirred at room temperature under 30 W blue LEDs irradiation for 20 hours. Then the reaction mixture was diluted with EtOAc, then washed with brine, dried over Na<sub>2</sub>SO<sub>4</sub>, filtered, and concentrated under reduced pressure. Product **5c** was obtained in 58% yield.

## The regioselectivity of 3,4-sulfonylarylation of 1,3-enynes

For our 3,4-sulfonylarylation of 1,3-enynes, migratory insertion of sulfonyl group took place at the C3 atom of 1,3-enynes, and such regioselectivity is different from Rueping's report.<sup>[6]</sup> We performed a few more experiments as followings. The 3,4-sulfonylarylation of 1,3-enynes, proceeded smoothly under Rueping's conditions, furnishing the same product (**7a**). Furthermore, Rueping's sulfonylarylation of phenylacetylene under our catalytic conditions yielded the same regioisomer (**7x**). It is therefore clear that the nature of substrates determines the different regioselectivities observed in these two studies.

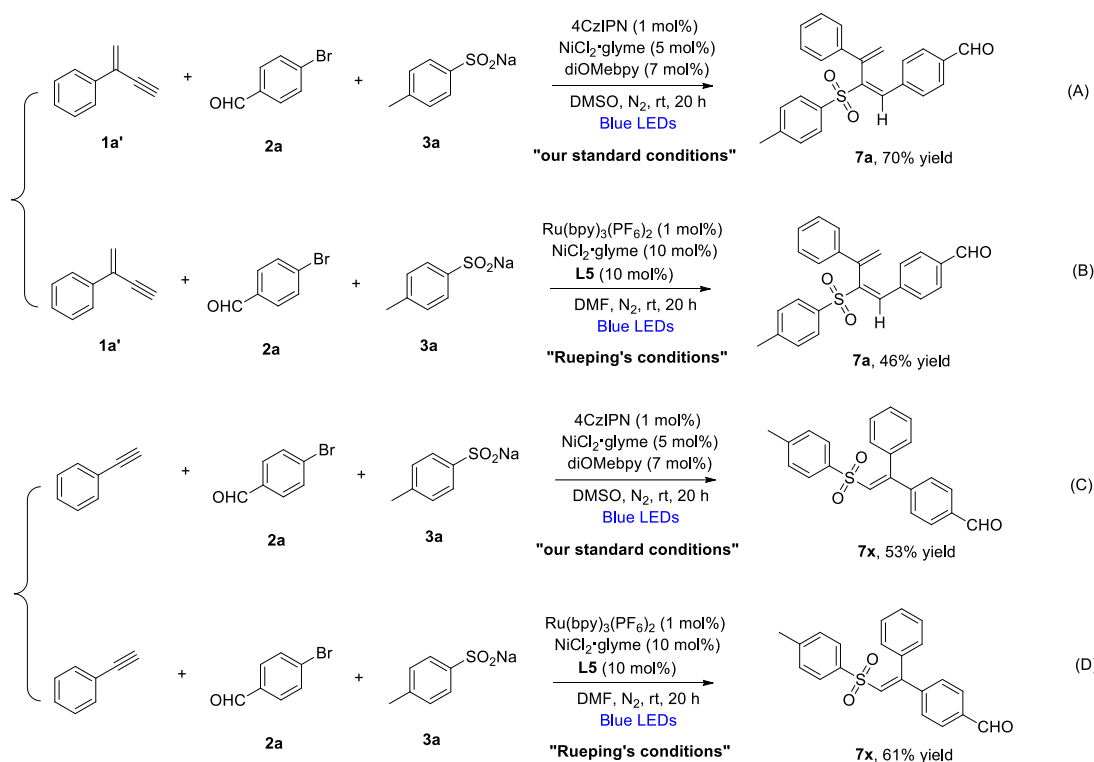

**(A) procedure:** A dry reaction tube equipped with a Teflon-coated magnetic stir bar was charged with 4CzIPN (1.6 mg, 0.002 mmol, 1 mol%), NiCl<sub>2</sub>·glyme (2.2 mg, 0.01 mmol, 5 mol%), diOMebpy (3.0 mg, 0.014 mmol, 7 mol%), 4-bromobenzaldehyde **2a** (36.8 mg, 0.2 mmol, 1 equiv.) and sodium *p*-methylbenzene sulfinate **3a** (42.7 mg, 0.24 mmol, 1.2 equiv.). It was capped with a rubber septum, evacuated and backfilled with

argon. Then, degassed anhydrous DMSO (2.0 mL) and 1,3-enyne **1a'** (51.2 mg, 0.4 mmol, 2 equiv.) were added via syringe. The reaction mixture was stirred at room temperature under 30 W blue LEDs irradiation for 20 hours. After the reaction completion, the reaction mixture was diluted with EtOAc, then washed with brine, dried over Na<sub>2</sub>SO<sub>4</sub>, filtered, and concentrated under reduced pressure. The residue was purified by column chromatography on silica gel (hexane/EtOAc) to afford the corresponding product **7a** (54.3 mg, 70% yield) as light yellow solid.

**(B) procedure:** A dry reaction tube equipped with a Teflon-coated magnetic stir bar was charged with Ru(bpy)<sub>3</sub>(PF<sub>6</sub>)<sub>2</sub> (1.4 mg, 0.002 mmol, 1 mol%), NiCl<sub>2</sub>·glyme (4.4 mg, 0.02 mmol, 10 mol%), **L5** (4.7 mg, 0.02 mmol, 10 mol%), 4-bromobenzaldehyde **2a** (73.6 mg, 0.4 mmol, 2 equiv.) and sodium *p*-methylbenzene sulfinate **3a** (35.6 mg, 0.2 mmol, 1 equiv.). It was capped with a rubber septum, evacuated and backfilled with argon. Then, degassed anhydrous DMF (2.0 mL) and 1,3-enyne **1a'** (51.2 mg, 0.4 mmol, 2 equiv.) were added via syringe. The reaction mixture was stirred at room temperature under 30 W blue LEDs irradiation for 20 hours. After the reaction completion, the reaction mixture was diluted with EtOAc, then washed with brine, dried over Na<sub>2</sub>SO<sub>4</sub>, filtered, and concentrated under reduced pressure. The residue was purified by column chromatography on silica gel (hexane/EtOAc) to afford the corresponding product **7a** (35.7 mg, 46% yield) as light yellow solid.

**(C) procedure:** A dry reaction tube equipped with a Teflon-coated magnetic stir bar was charged with 4CzIPN (1.6 mg, 0.002 mmol, 1 mol%), NiCl<sub>2</sub>·glyme (2.2 mg, 0.01 mmol, 5 mol%), diOMebpy (3.0 mg, 0.014 mmol, 7 mol%), 4-bromobenzaldehyde **2a** (36.8 mg, 0.2 mmol, 1 equiv.) and sodium *p*-methylbenzene sulfinate **3a** (42.7 mg, 0.24 mmol, 1.2 equiv.). It was capped with a rubber septum, evacuated and backfilled with argon. Then, degassed anhydrous DMSO (2.0 mL) and phenylacetylene (44  $\mu$ L, 0.4 mmol, 2 equiv.) were added via syringe. The reaction mixture was stirred at room temperature under 30 W blue LEDs irradiation for 20 hours. After the reaction completion, the reaction mixture was diluted with EtOAc, then washed with brine, dried

over Na<sub>2</sub>SO<sub>4</sub>, filtered, and concentrated under reduced pressure. The residue was purified by column chromatography on silica gel (hexane/EtOAc) to afford the corresponding product **7x** (38.4 mg, 53% yield) as light yellow solid. <sup>1</sup>H NMR (400 MHz, CDCl<sub>3</sub>) δ 10.00 (s, 1H), 7.81 (d, *J* = 8.4 Hz, 2H), 7.49 (d, *J* = 8.4 Hz, 2H), 7.41 – 7.31 (m, 5H), 7.17 (d, *J* = 7.6 Hz, 2H), 7.11 (d, *J* = 7.2 Hz, 2H), 7.05 (s, 1H), 2.39 (s, 3H). Data in accordance with the literature.<sup>[6]</sup>

**(D) procedure:** A dry reaction tube equipped with a Teflon-coated magnetic stir bar was charged with Ru(bpy)<sub>3</sub>(PF<sub>6</sub>)<sub>2</sub> (1.4 mg, 0.002 mmol, 1 mol%), NiCl<sub>2</sub>·glyme (4.4 mg, 0.02 mmol, 10 mol%), **L5** (4.7 mg, 0.02 mmol, 10 mol%), 4-bromobenzaldehyde **2a** (73.6 mg, 0.4 mmol, 2 equiv.) and sodium *p*-methylbenzene sulfinate **3a** (35.6 mg, 0.2 mmol, 1 equiv.). It was capped with a rubber septum, evacuated and backfilled with argon. Then, degassed anhydrous DMF (2.0 mL) and phenylacetylene (44 uL, 0.4 mmol, 2 equiv.) were added via syringe. The reaction mixture was stirred at room temperature under 30 W blue LEDs irradiation for 20 hours. After the reaction completion, the reaction mixture was diluted with EtOAc, then washed with brine, dried over Na<sub>2</sub>SO<sub>4</sub>, filtered, and concentrated under reduced pressure. The residue was purified by column chromatography on silica gel (hexane/EtOAc) to afford the corresponding product **7x** (44.2 mg, 61% yield) as light yellow solid.

## 8. X-ray crystallography data

CCDC 2052659 (**4u**) contains the supplementary crystallographic data for this paper. These data can be obtained free of charge from The Cambridge Crystallographic Data Centre via [www.ccdc.cam.ac.uk/data\\_request/cif](http://www.ccdc.cam.ac.uk/data_request/cif).



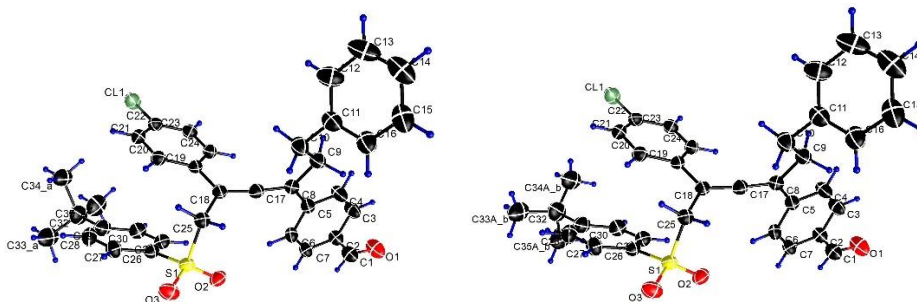

Note: The crystal is Monoclinic, space group  $P2_1/c$ . The asymmetric unit contains one molecule of the compound  $C_{35}H_{33}ClO_3S$ . The  $C(CH_3)_3$  group was disordered into two positions with occupancy ratio = 51:49. Restraints in bond lengths and thermal parameters were applied to the disordered atoms.

Final R values are  $R_1=0.0478$  and  $wR_2=0.1279$  for 2- theta up to  $140^\circ$ .

Table 1. Crystal data and structure refinement for K482.

|                                 |                                                                    |                  |
|---------------------------------|--------------------------------------------------------------------|------------------|
| Identification code             | K482                                                               |                  |
| Empirical formula               | $C_{35} H_{33} Cl O_3 S$                                           |                  |
| Formula weight                  | 569.12                                                             |                  |
| Temperature                     | 100(2) K                                                           |                  |
| Wavelength                      | 1.54178 Å                                                          |                  |
| Crystal system                  | Monoclinic                                                         |                  |
| Space group                     | $P2_1/c$                                                           |                  |
| Unit cell dimensions            | $a = 11.6577(3)$ Å                                                 | $a = 90^\circ$ . |
|                                 | $b = 27.6265(8)$ Å                                                 | $b =$            |
|                                 | $c = 10.2389(3)$ Å                                                 | $g = 90^\circ$ . |
|                                 | 113.3930(10)°.                                                     |                  |
| Volume                          | 3026.51(15) Å <sup>3</sup>                                         |                  |
| Z                               | 4                                                                  |                  |
| Density (calculated)            | 1.249 Mg/m <sup>3</sup>                                            |                  |
| Absorption coefficient          | 2.021 mm <sup>-1</sup>                                             |                  |
| F(000)                          | 1200                                                               |                  |
| Crystal size                    | 0.627 x 0.323 x 0.266 mm <sup>3</sup>                              |                  |
| Theta range for data collection | 3.199 to 69.966°.                                                  |                  |
| Index ranges                    | $-14 \leq h \leq 13$ , $-33 \leq k \leq 31$ , $-12 \leq l \leq 12$ |                  |
| Reflections collected           | 22521                                                              |                  |

|                                   |                                             |
|-----------------------------------|---------------------------------------------|
| Independent reflections           | 5717 [R(int) = 0.0358]                      |
| Completeness to theta = 67.679°   | 99.8 %                                      |
| Absorption correction             | Semi-empirical from equivalents             |
| Max. and min. transmission        | 0.7533 and 0.5957                           |
| Refinement method                 | Full-matrix least-squares on F <sup>2</sup> |
| Data / restraints / parameters    | 5717 / 39 / 395                             |
| Goodness-of-fit on F <sup>2</sup> | 1.067                                       |
| Final R indices [I>2sigma(I)]     | R1 = 0.0478, wR2 = 0.1256                   |
| R indices (all data)              | R1 = 0.0508, wR2 = 0.1279                   |
| Extinction coefficient            | n/a                                         |
| Largest diff. peak and hole       | 0.701 and -0.377 e.Å <sup>-3</sup>          |

CCDC 2052657 (**7m**) contains the supplementary crystallographic data for this paper. These data can be obtained free of charge from The Cambridge Crystallographic Data Centre via [www.ccdc.cam.ac.uk/data\\_request/cif](http://www.ccdc.cam.ac.uk/data_request/cif).

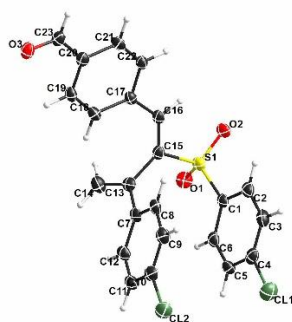

Note: The crystal is triclinic, space group P-1. The asymmetric unit contains one molecule of the compound C<sub>23</sub>H<sub>16</sub>Cl<sub>2</sub>O<sub>3</sub>S.

The crystal is a non-merohedral twin and twin refinement performed with BASF=0.42289.

Final R values are R1=0.0644 and wR2=0.1611 for 2- theta up to 57°.

Table 1. Sample and crystal data for K433.

|                     |                                                                  |
|---------------------|------------------------------------------------------------------|
| Identification code | K433                                                             |
| Chemical formula    | C <sub>23</sub> H <sub>16</sub> Cl <sub>2</sub> O <sub>3</sub> S |

|                        |                                                                                                                                          |
|------------------------|------------------------------------------------------------------------------------------------------------------------------------------|
| Formula weight         | 443.32 g/mol                                                                                                                             |
| Temperature            | 100(2) K                                                                                                                                 |
| Wavelength             | 0.71073 Å                                                                                                                                |
| Crystal size           | 0.028 x 0.058 x 0.220 mm                                                                                                                 |
| Crystal system         | triclinic                                                                                                                                |
| Space group            | P -1                                                                                                                                     |
| Unit cell dimensions   | a = 7.3445(5) Å $\alpha = 97.717(2)^\circ$<br>b = 7.5430(5) Å $\beta = 95.887(2)^\circ$<br>c = 18.6349(12) Å $\gamma = 105.087(2)^\circ$ |
| Volume                 | 977.50(11) Å <sup>3</sup>                                                                                                                |
| Z                      | 2                                                                                                                                        |
| Density (calculated)   | 1.506 g/cm <sup>3</sup>                                                                                                                  |
| Absorption coefficient | 0.462 mm <sup>-1</sup>                                                                                                                   |
| F(000)                 | 456                                                                                                                                      |

## 9. References

- [1] A. U. Meyer, K. Straková, T. Slanina, B. König, *Chem. Eur. J.* **2016**, *22*, 8694.
- [2] a) X. Zhu, W. Deng, M-F. Chiou, C. Ye, W. Jian, Y. Zeng, Y. Jiao, L. Ge, Y. Li, X. Zhang, H. Bao, *J. Am. Chem. Soc.* **2019**, *141*, 548; b) T. R. Pradhan, D. K. Mohapatra, *Adv. Synth. Catal.* **2019**, *361*, 3605.
- [3] Y. Song, S. Song, X. Duan, X. Wu, F. Jiang, Y. Zhang, J. Fan, X. Huang, C. Fu, S. Ma, *Chem. Commun.* **2019**, *55*, 11774.
- [4] L. Huang, C. Zhu, L. Yi, H. Yue, R. Kancherla, M. Rueping, *Angew. Chem. Int. Ed.* **2020**, *59*, 457.
- [5] S-Z. Sun, Y. Duan, R. S. Mega, R. J. Somerville, R. Martin, *Angew. Chem. Int. Ed.* **2020**, *59*, 4370.
- [6] C. Zhu, H. Yue, B. Maity, I. Atodiresei, L. Cavallo, M. Rueping, *Nat. Catal.*, **2019**, *2*, 678.

## 10. Copy of NMR spectra

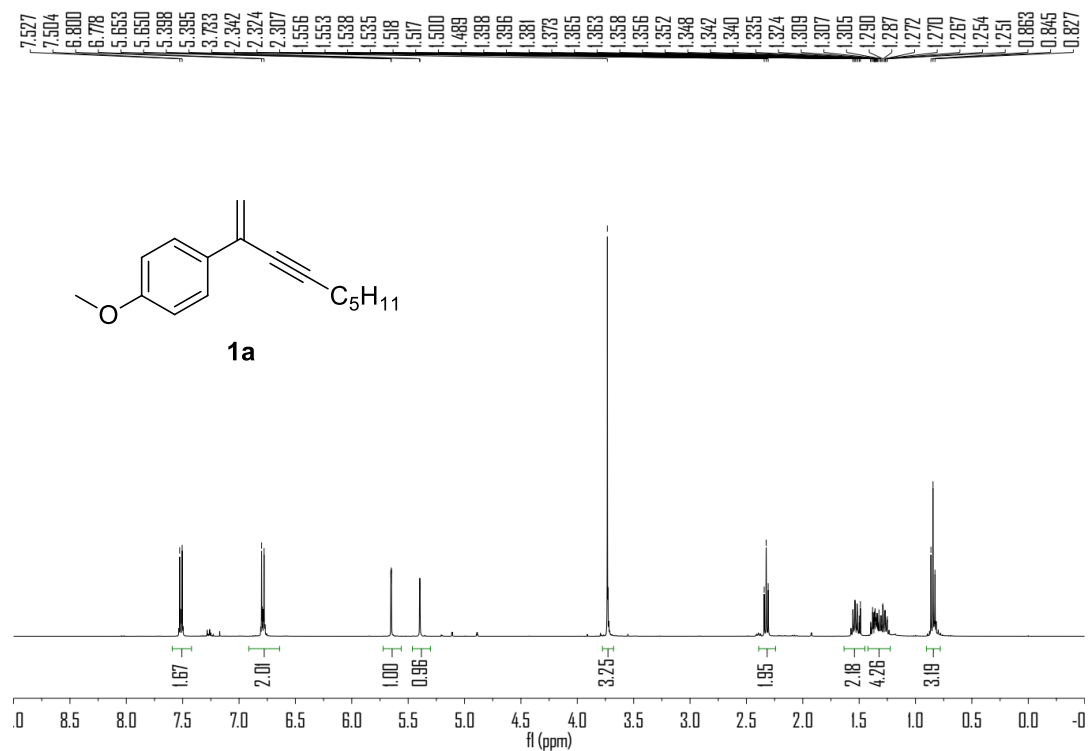

Ju108-2021-cy-s2-2.11.fid

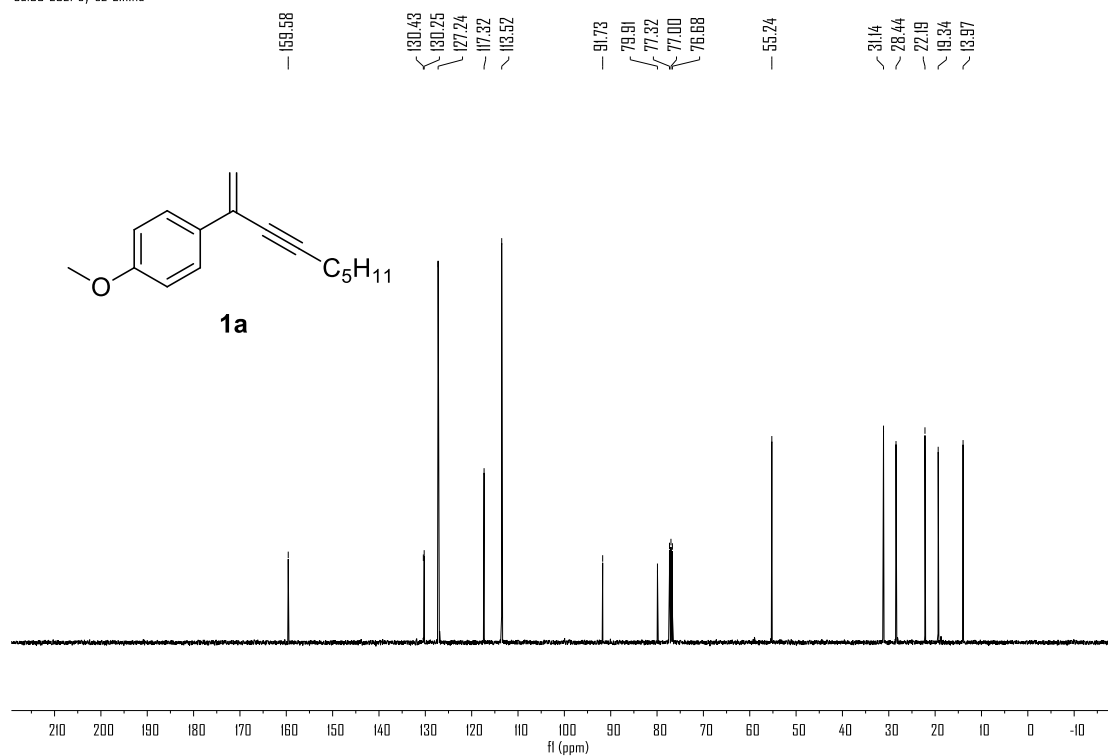

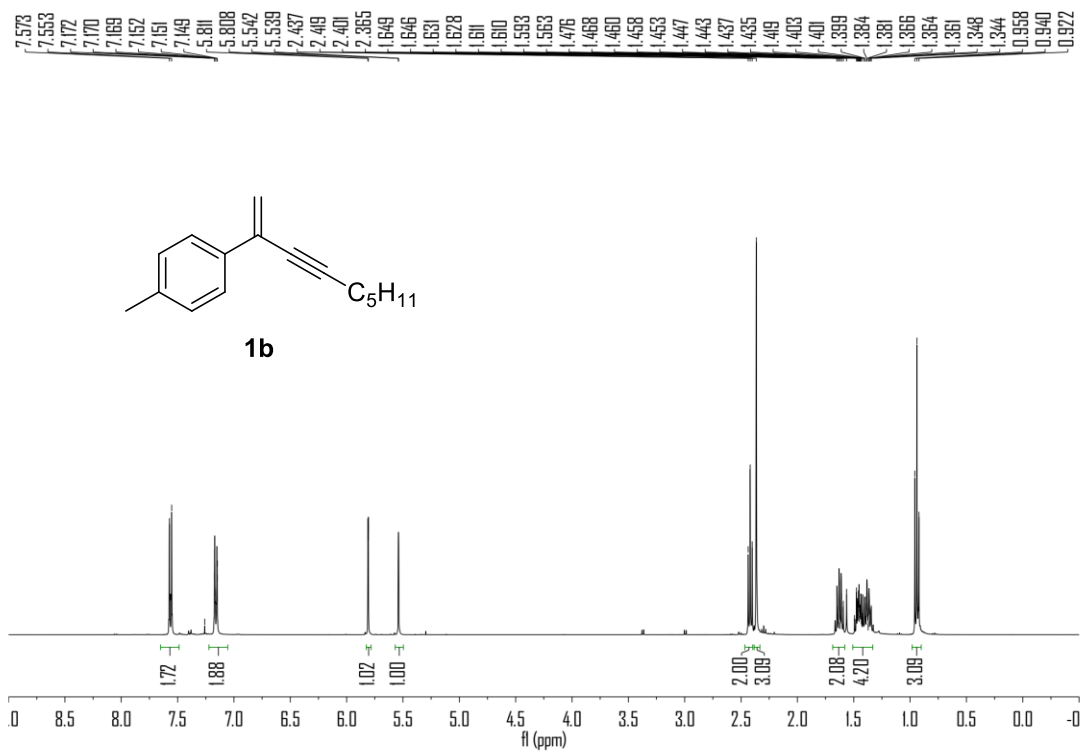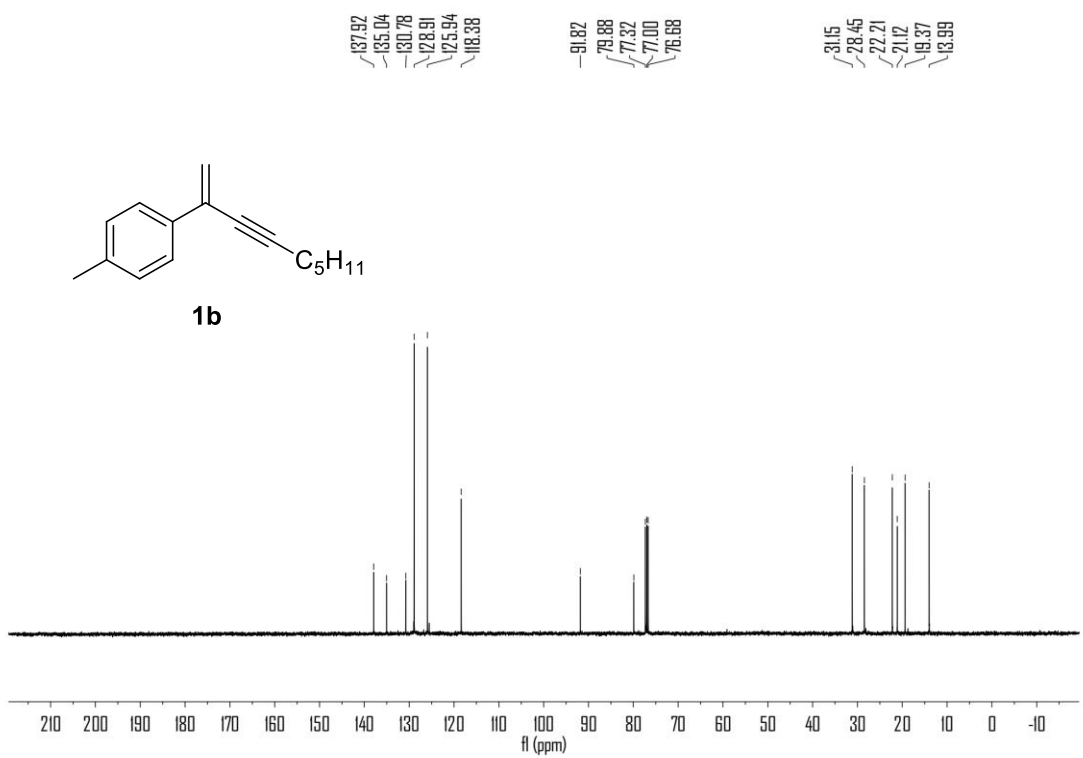

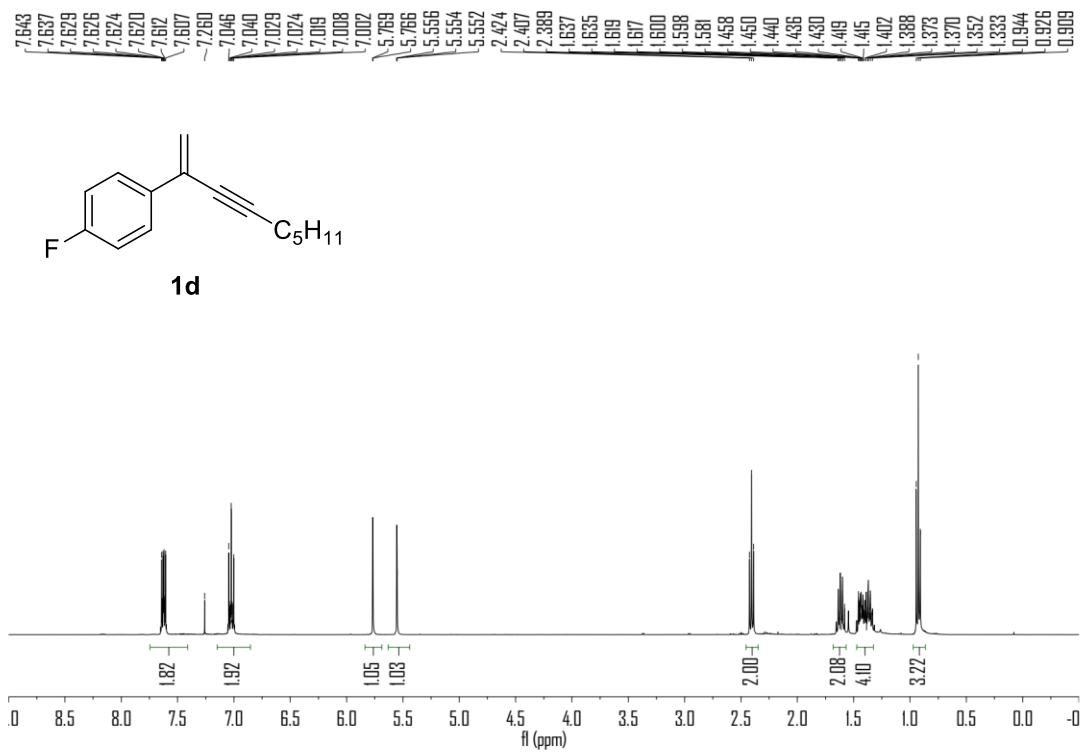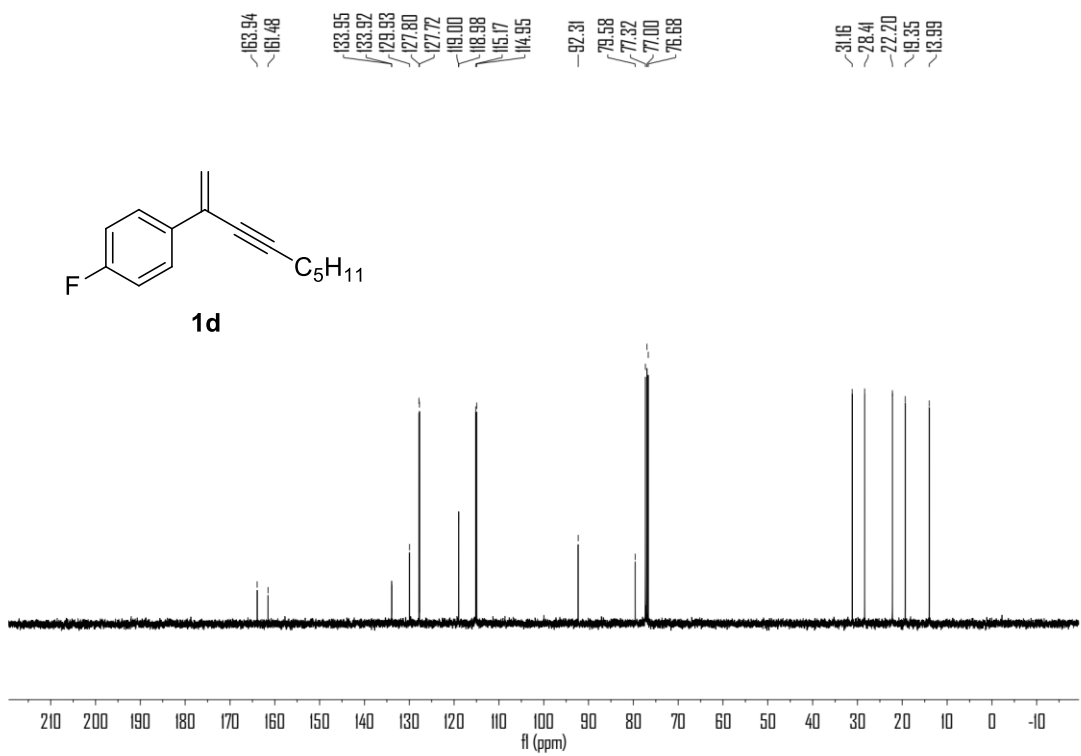

7.552 7.531 7.276 7.255 5.773 5.771 5.546 5.544 2.383 2.365 2.347 1.611 1.594 1.591 1.589 1.577 1.574 1.559 1.556 1.555 1.538 1.523 1.415 1.407 1.399 1.397 1.392 1.390 1.387 1.382 1.376 1.373 1.363 1.359 1.348 1.346 1.333 1.328 1.316 1.313 1.310 1.307 1.295 1.291 0.904 0.886 0.868

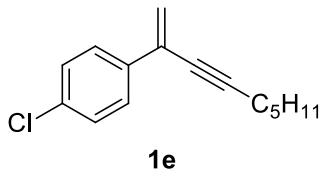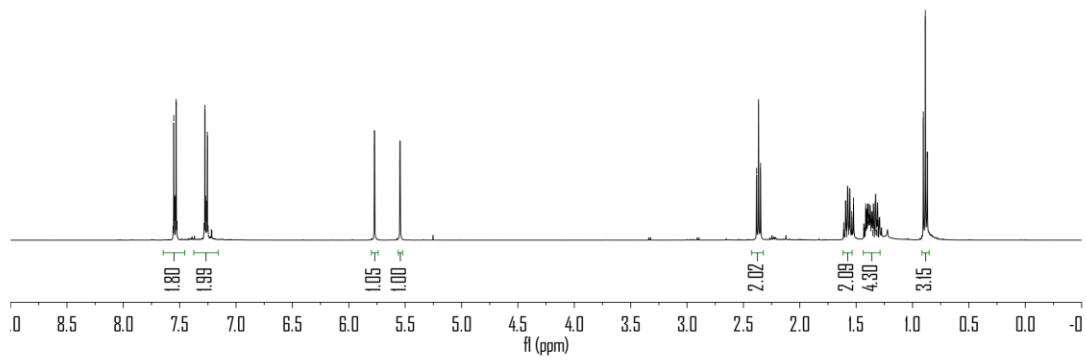

136.29 133.92 129.92 128.35 127.36 119.60 -92.51 79.32 77.32 77.00 76.68 31.15 28.38 27.19 19.34 18.98

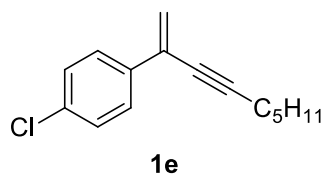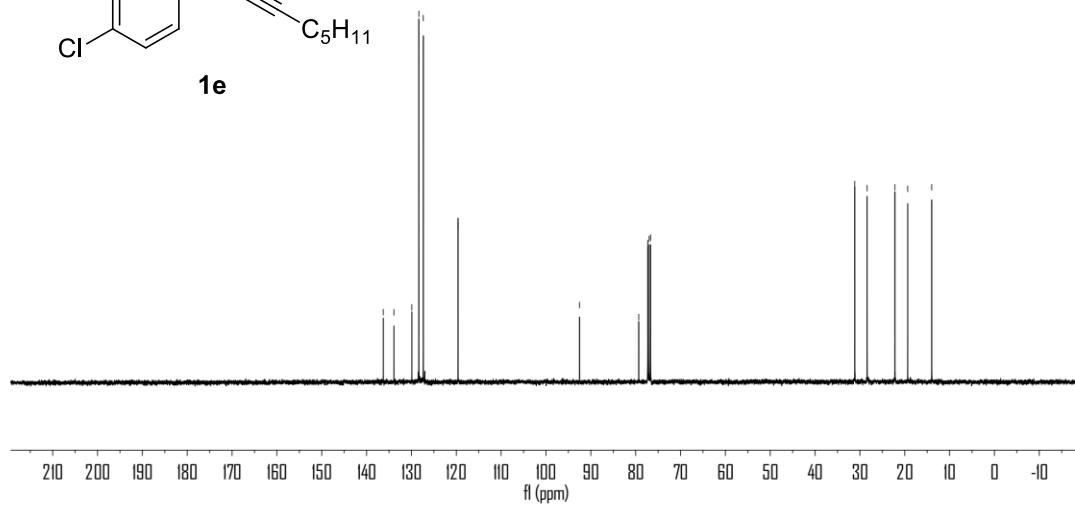



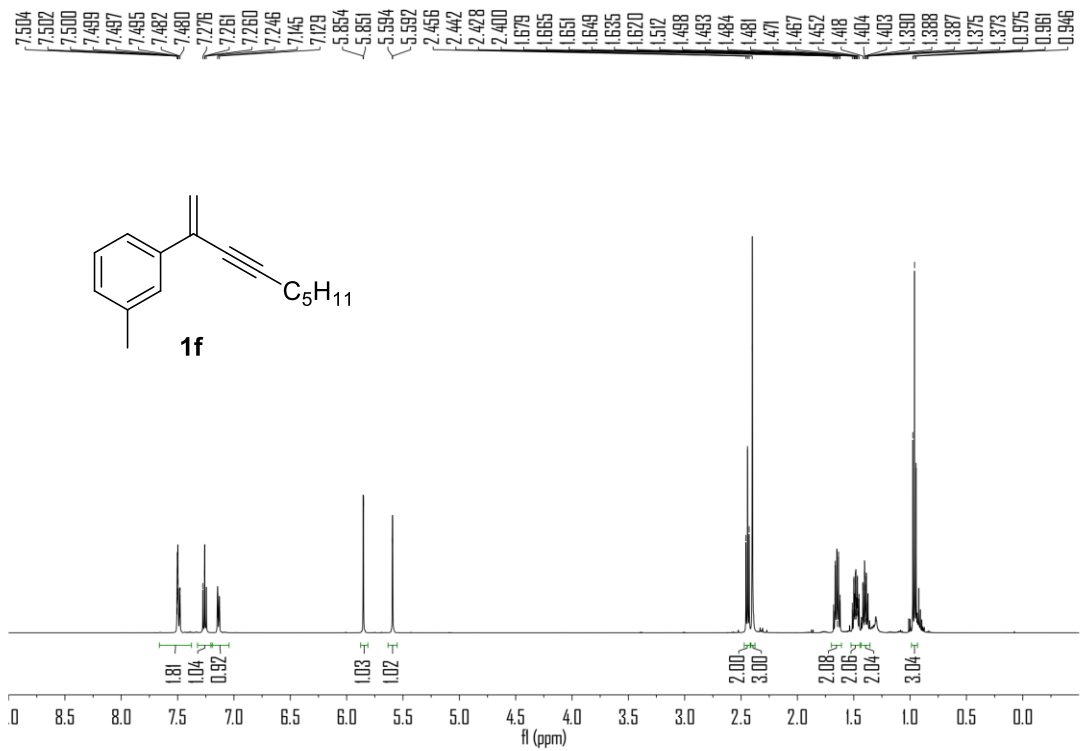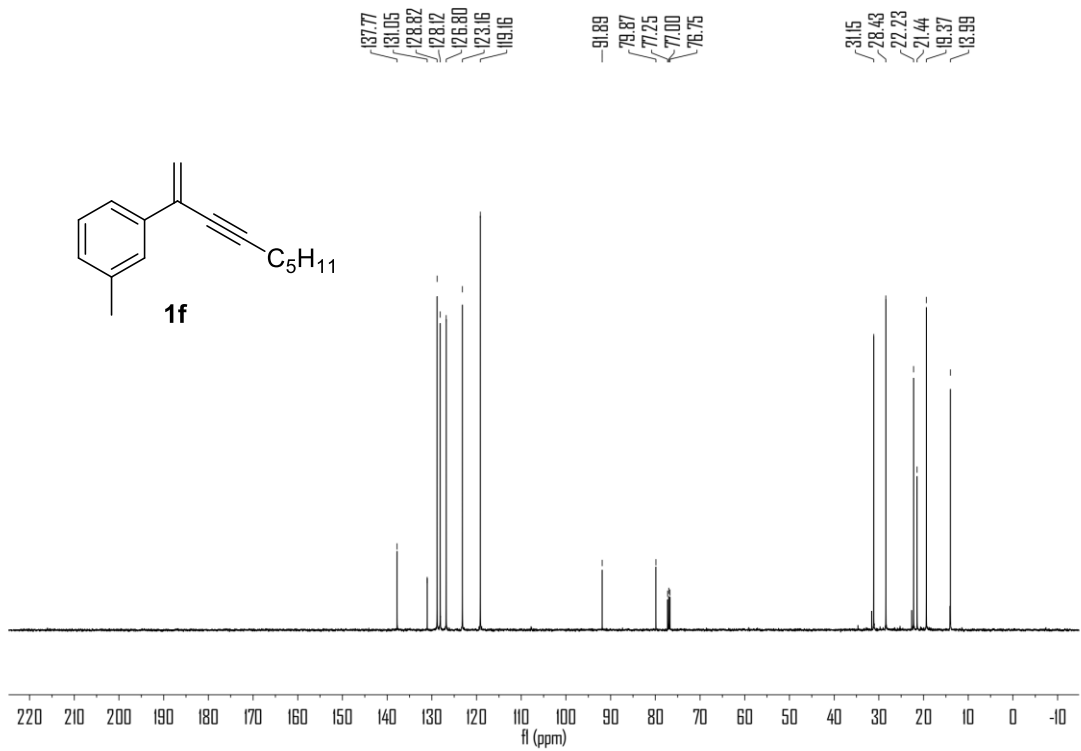

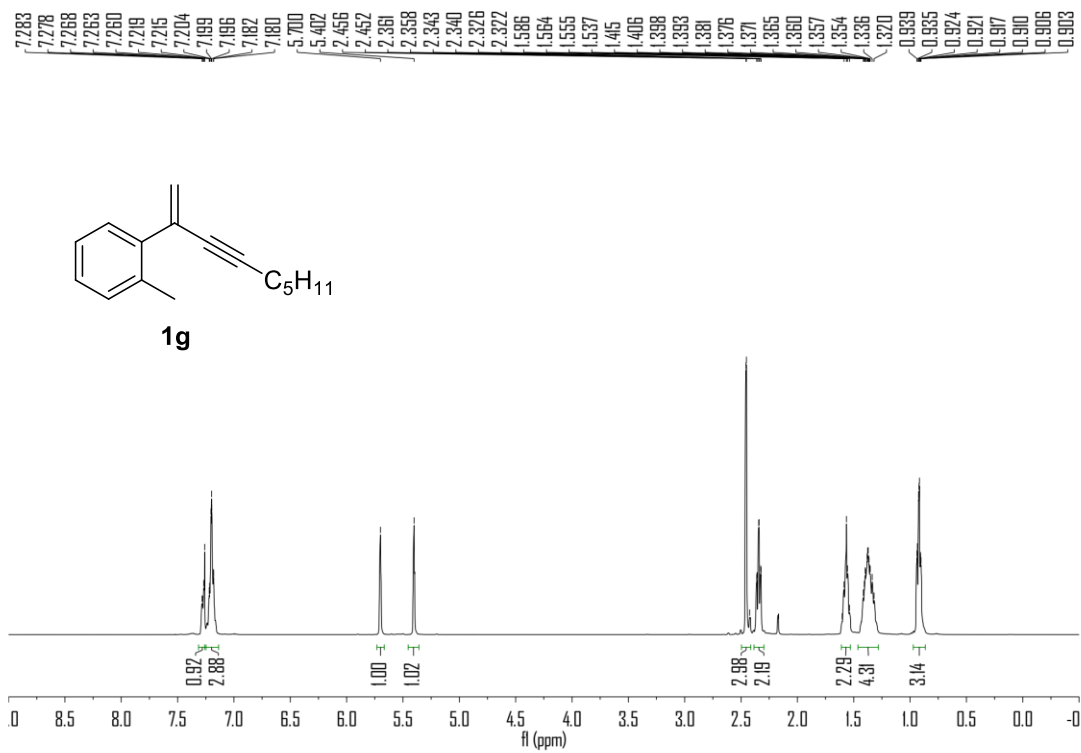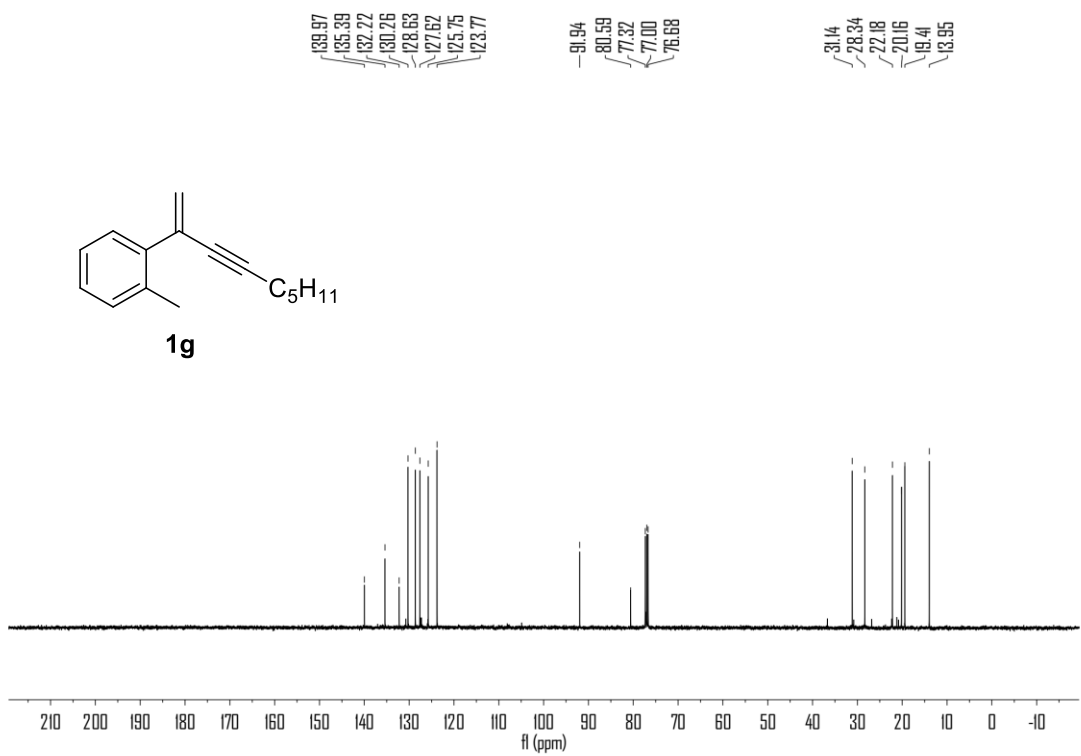

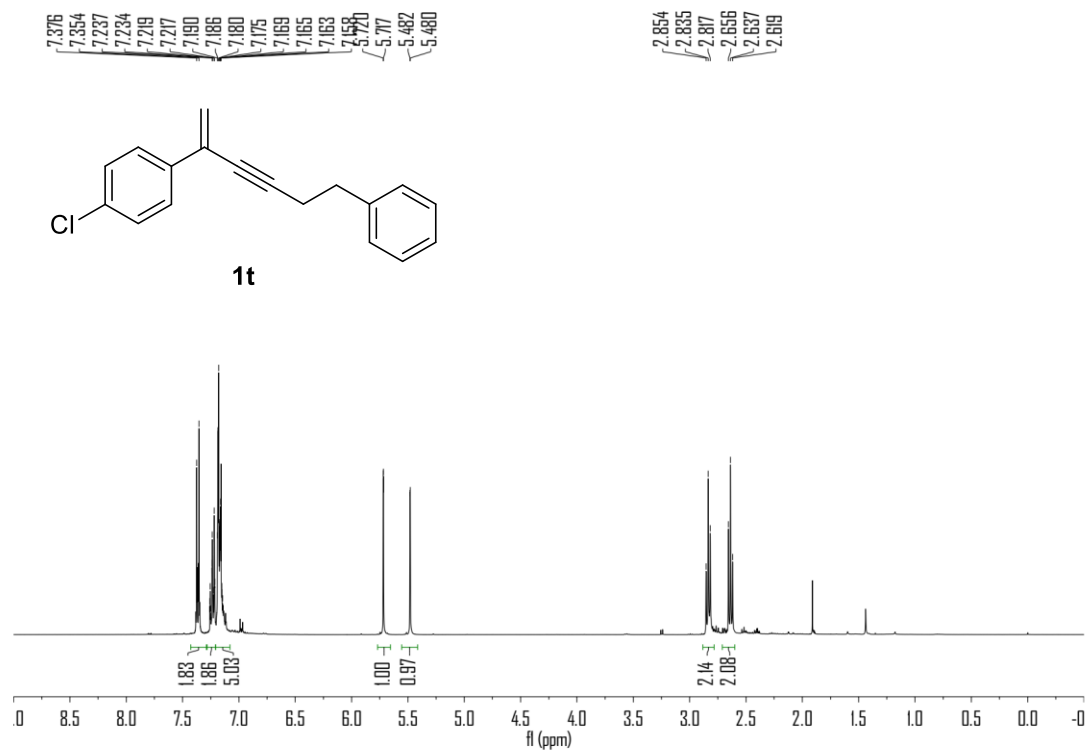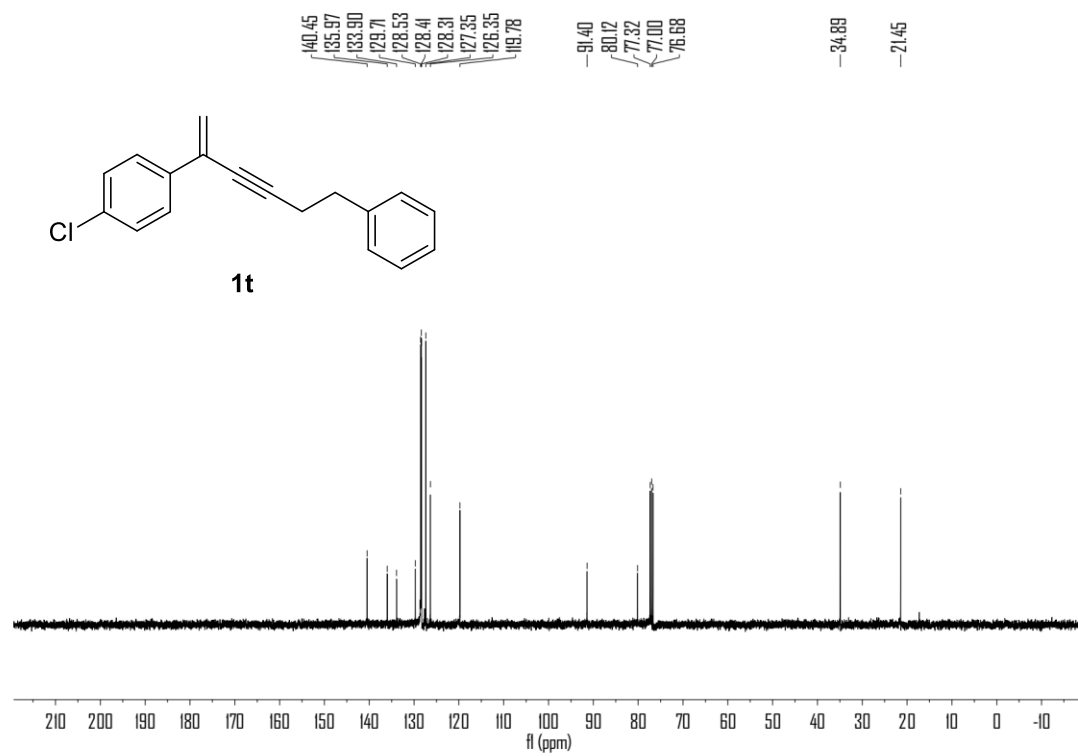

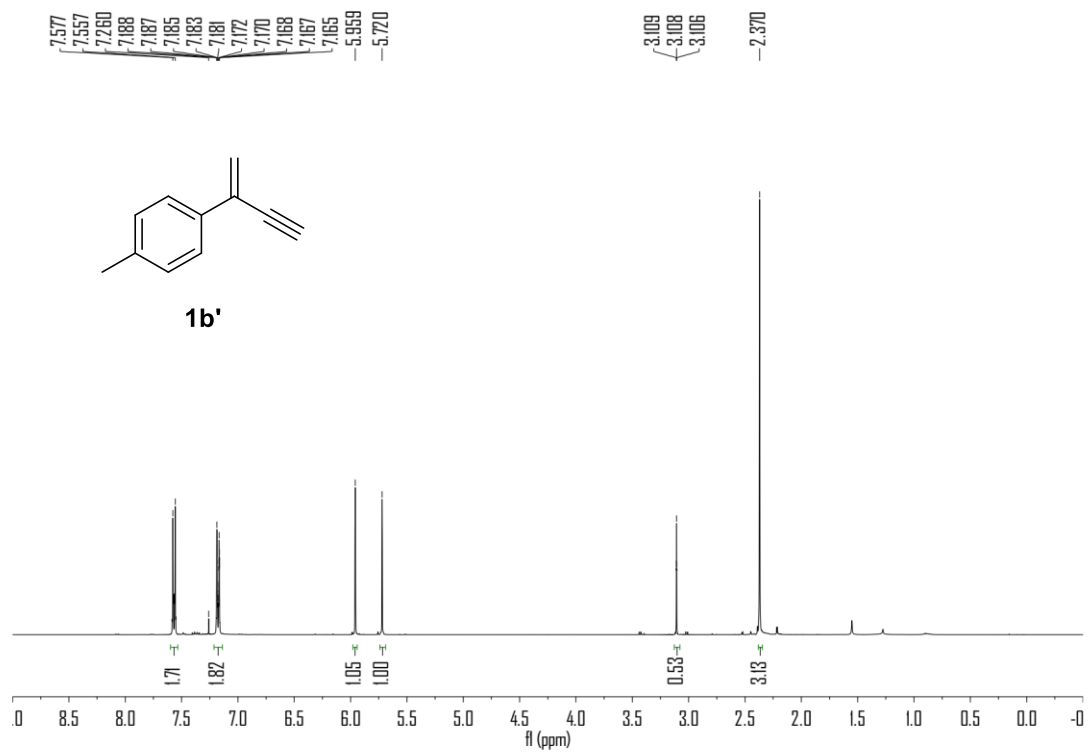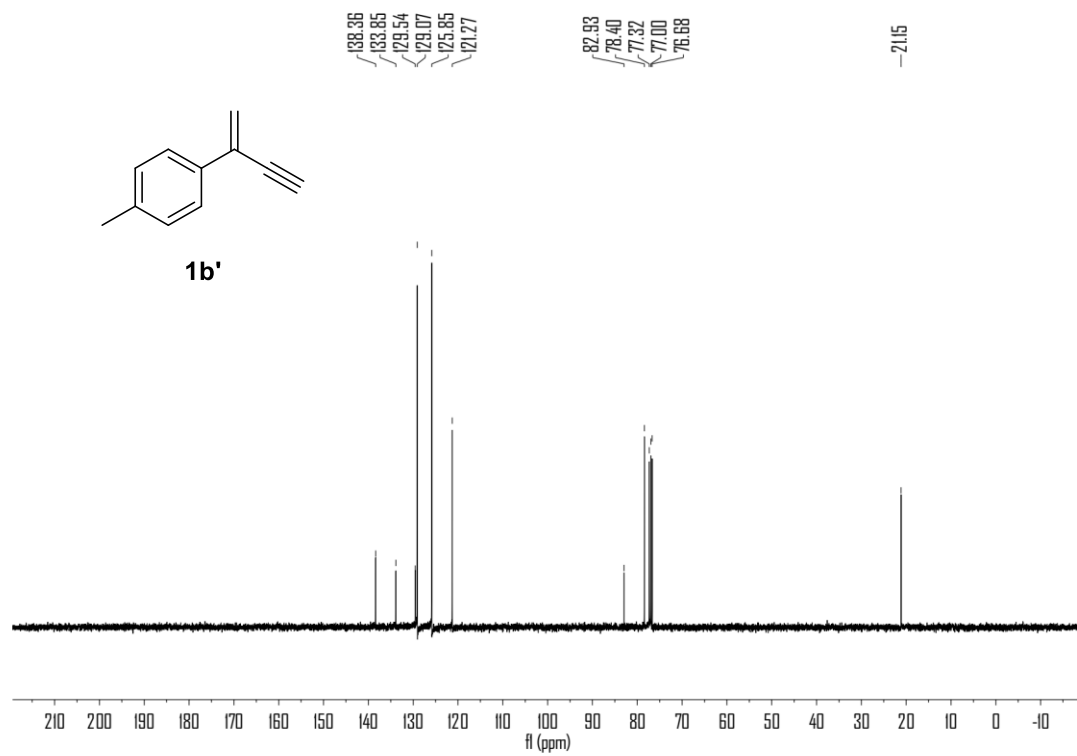

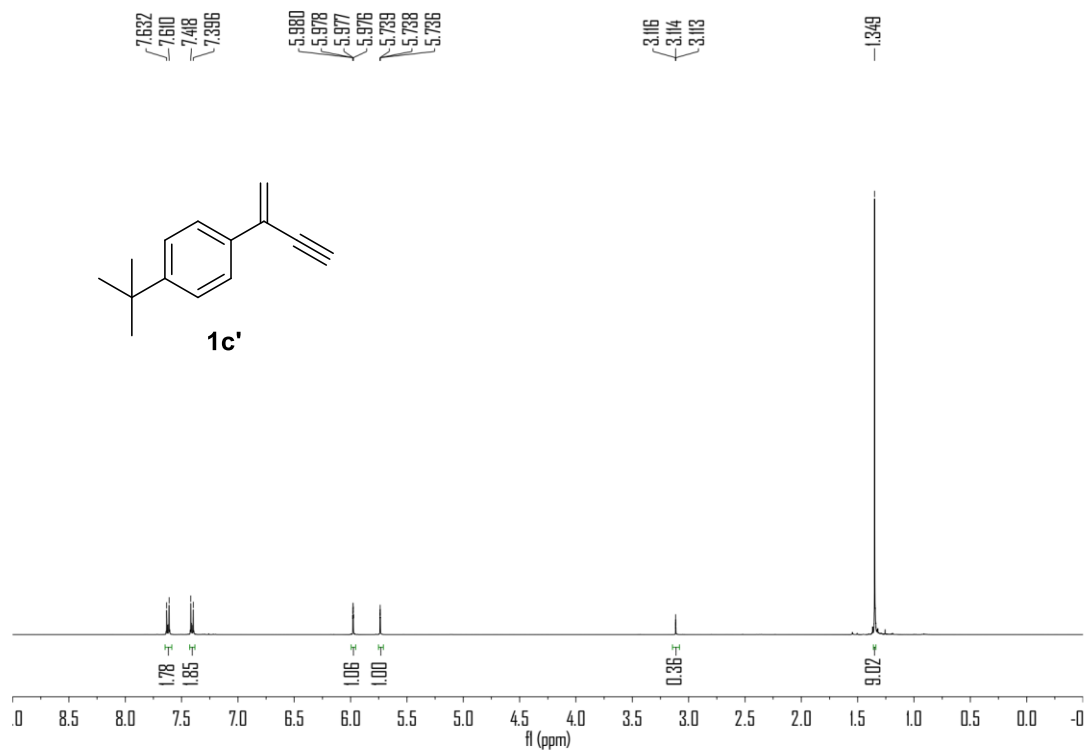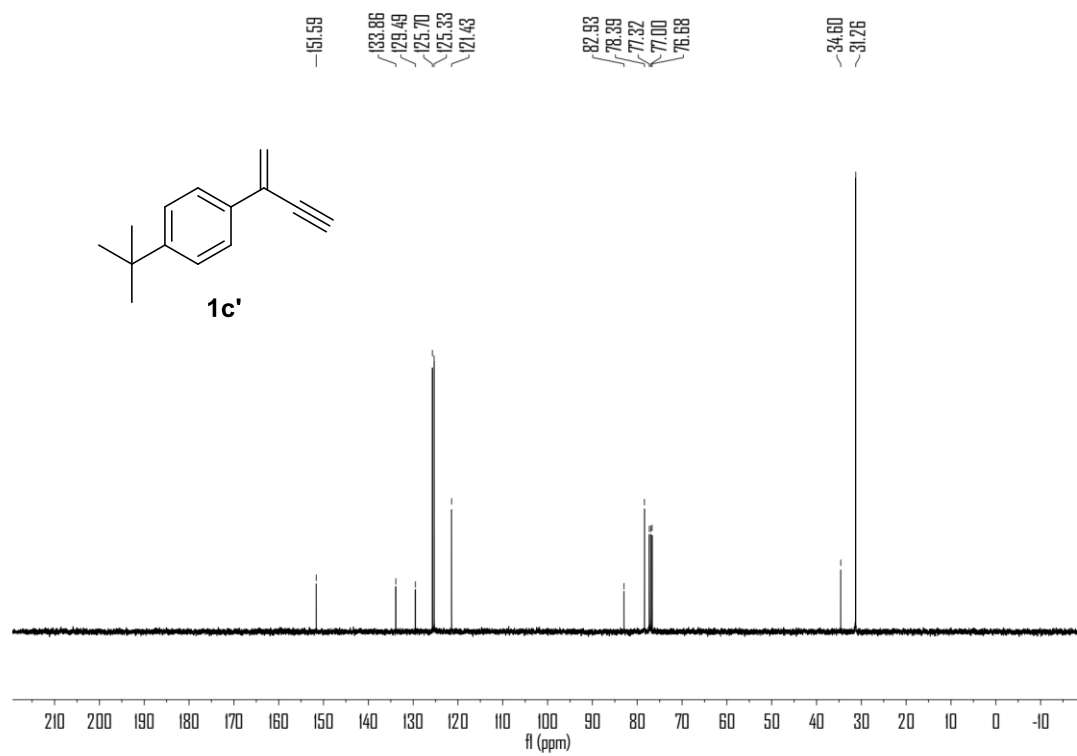

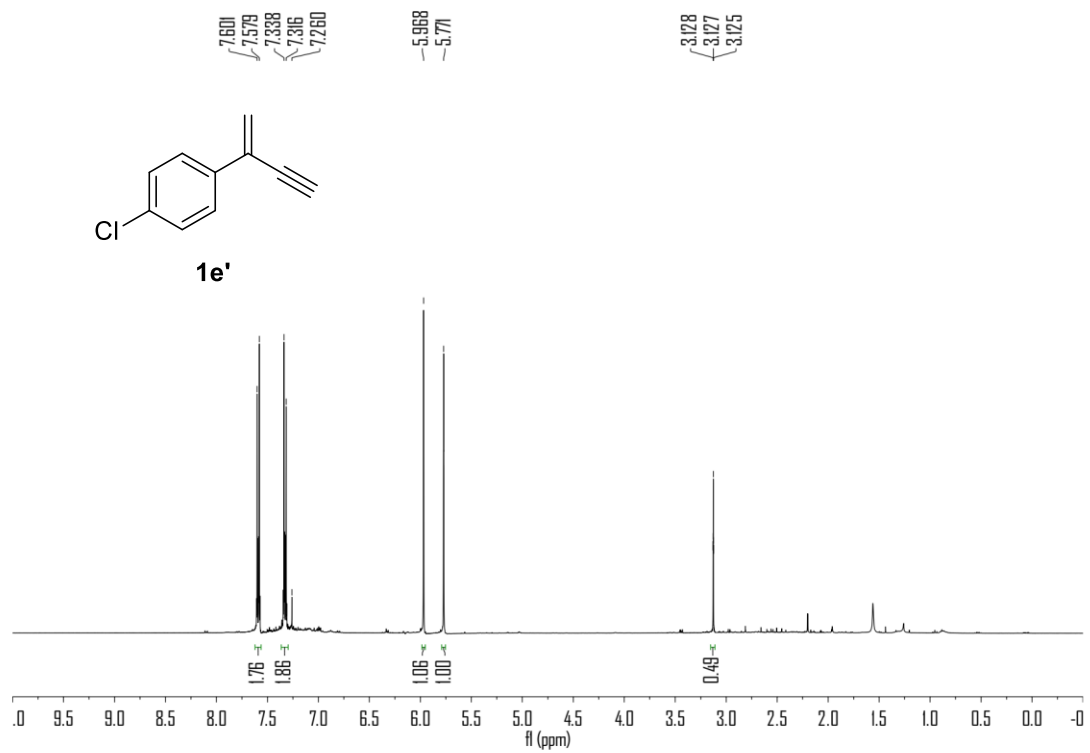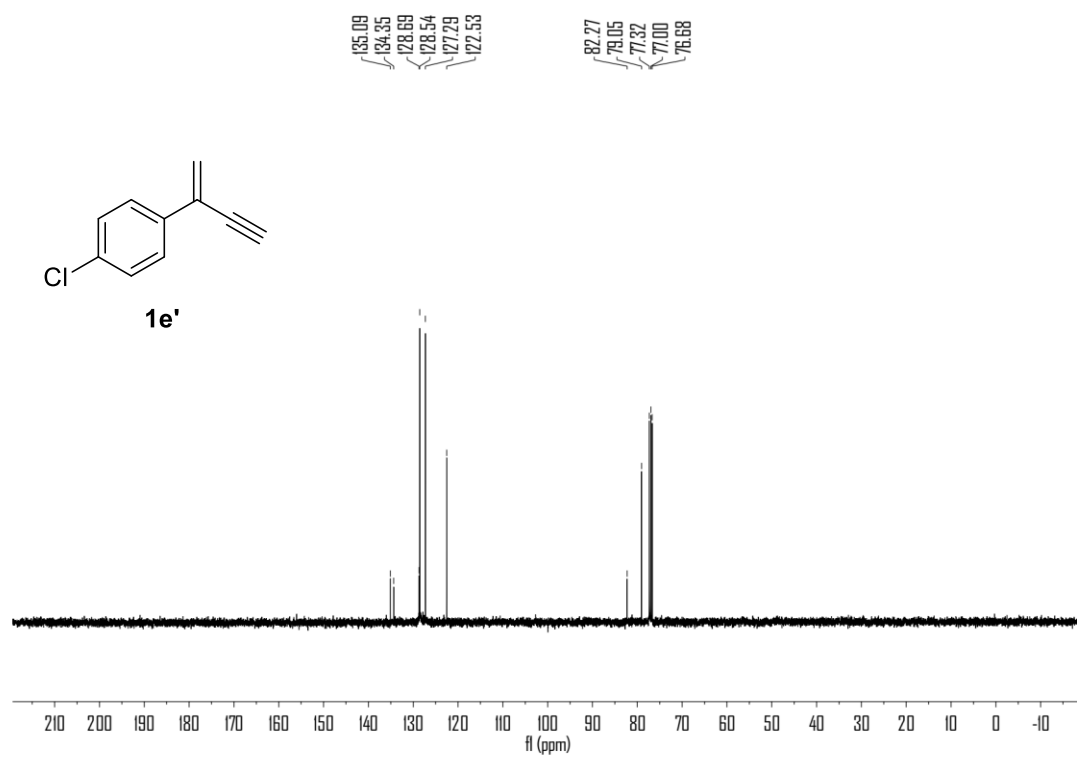

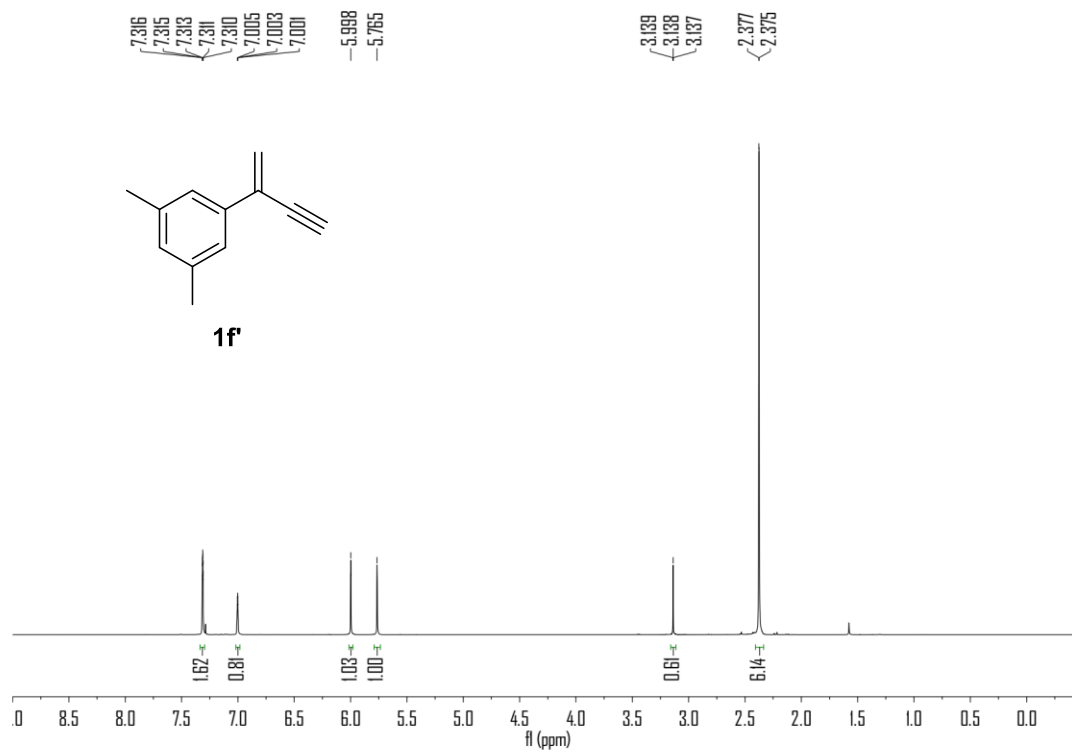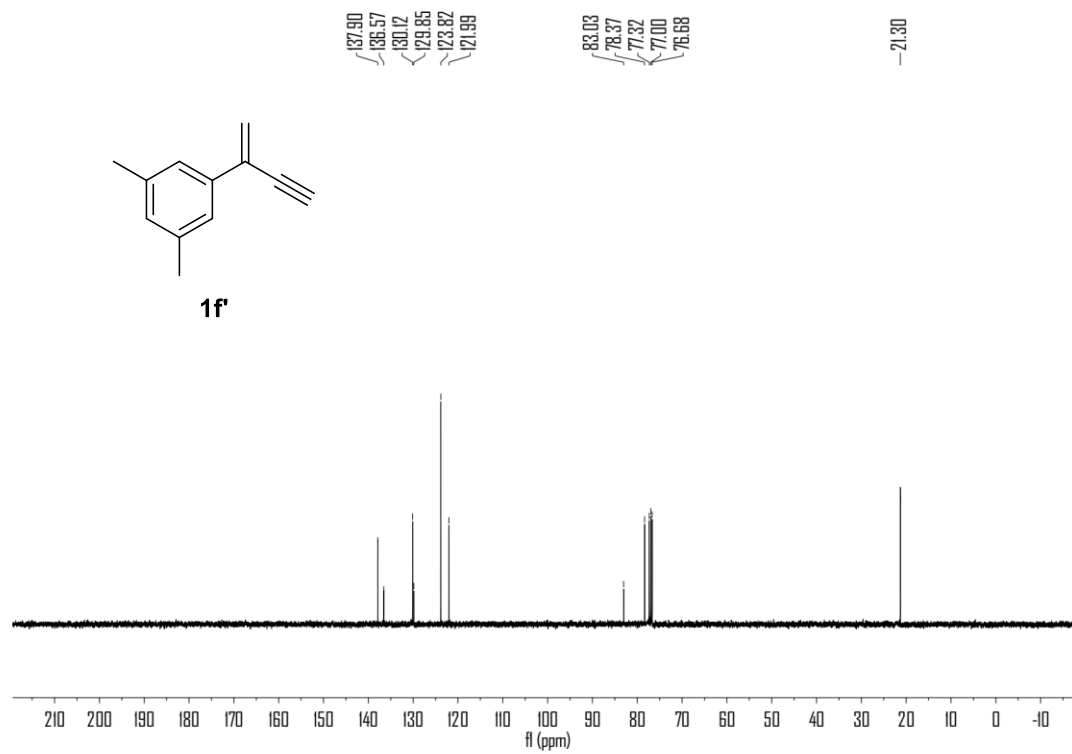

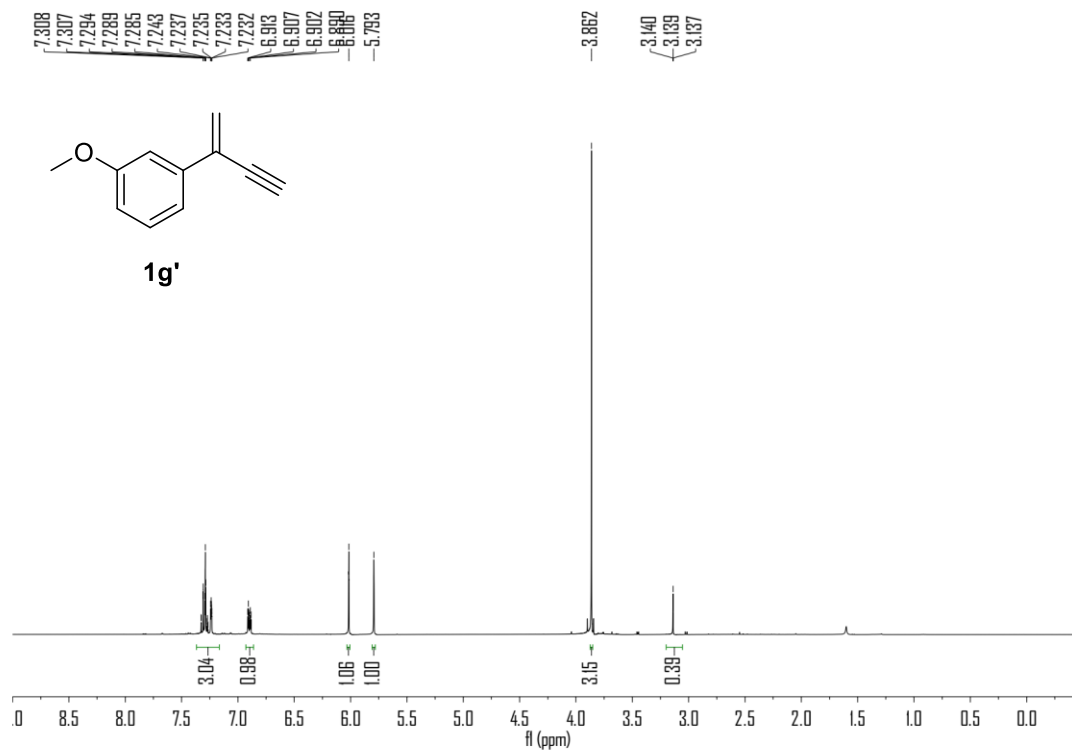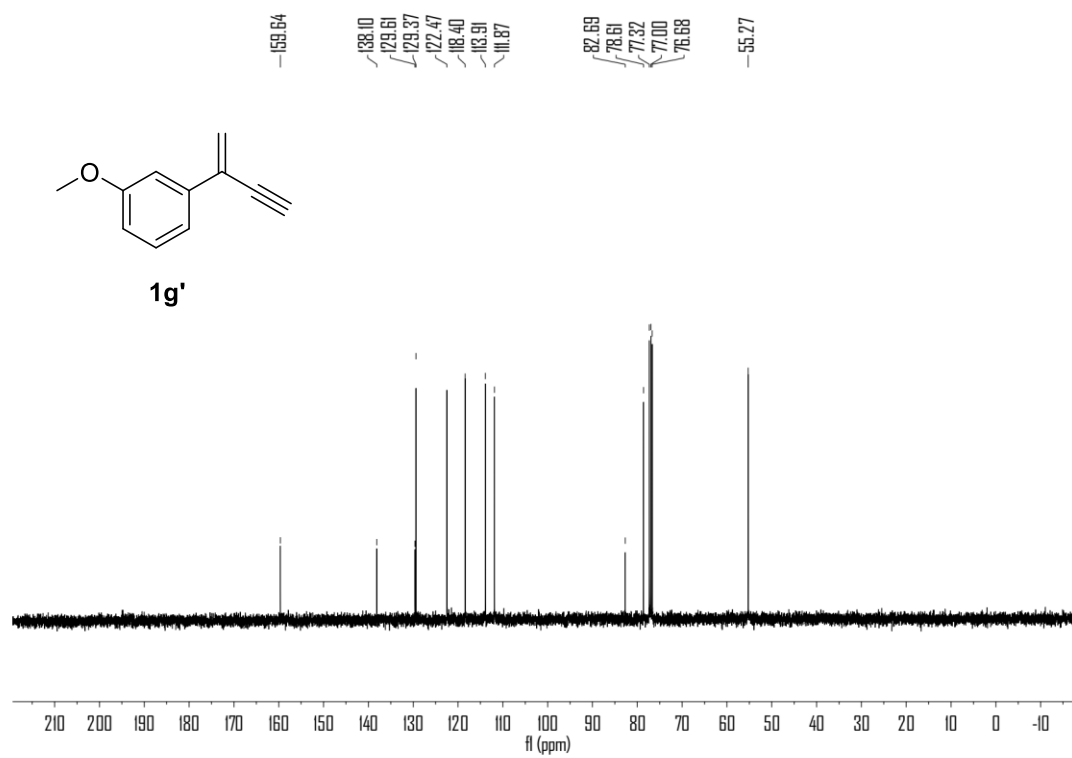



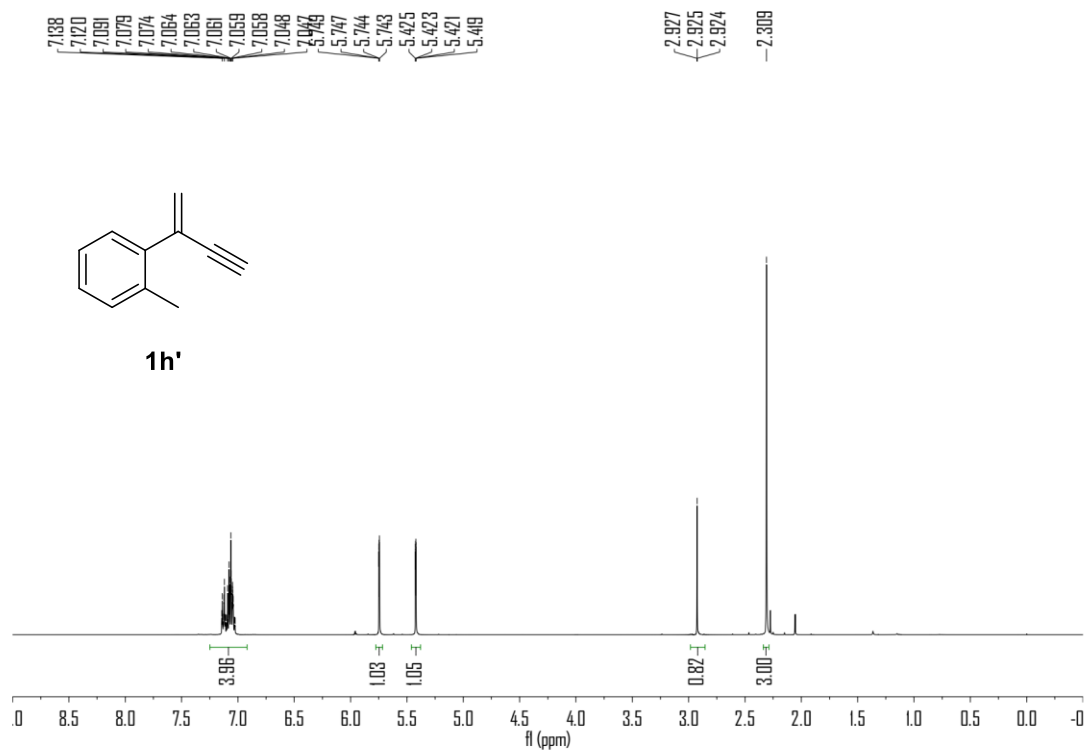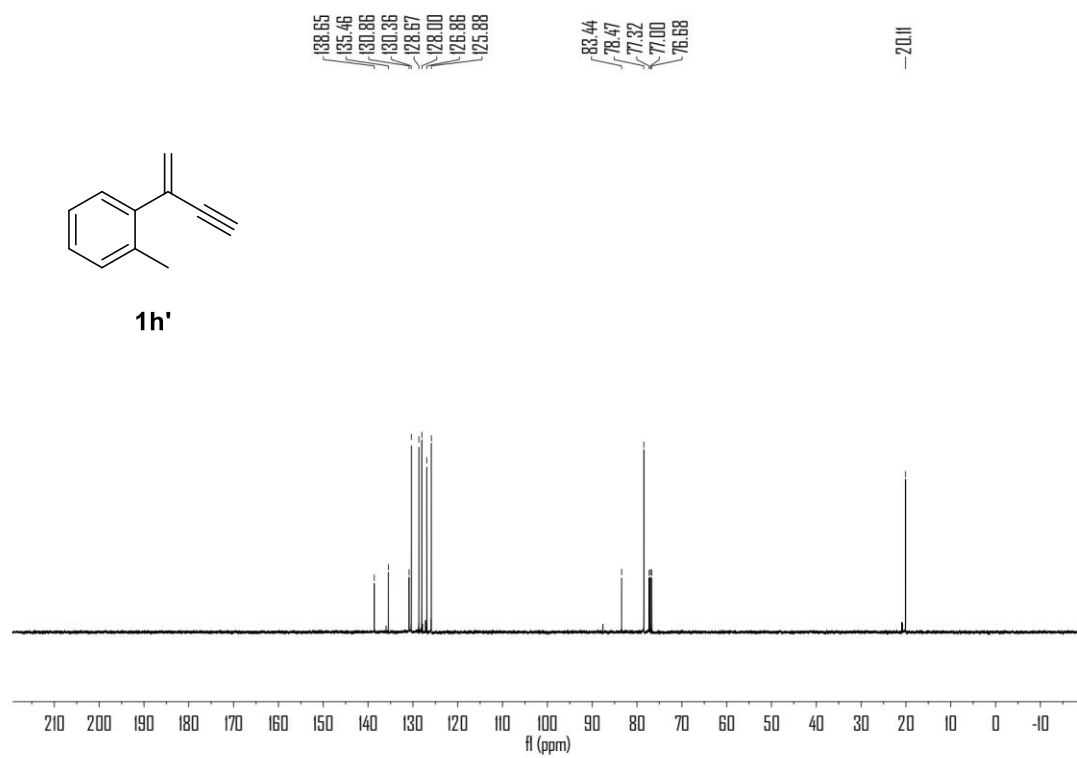

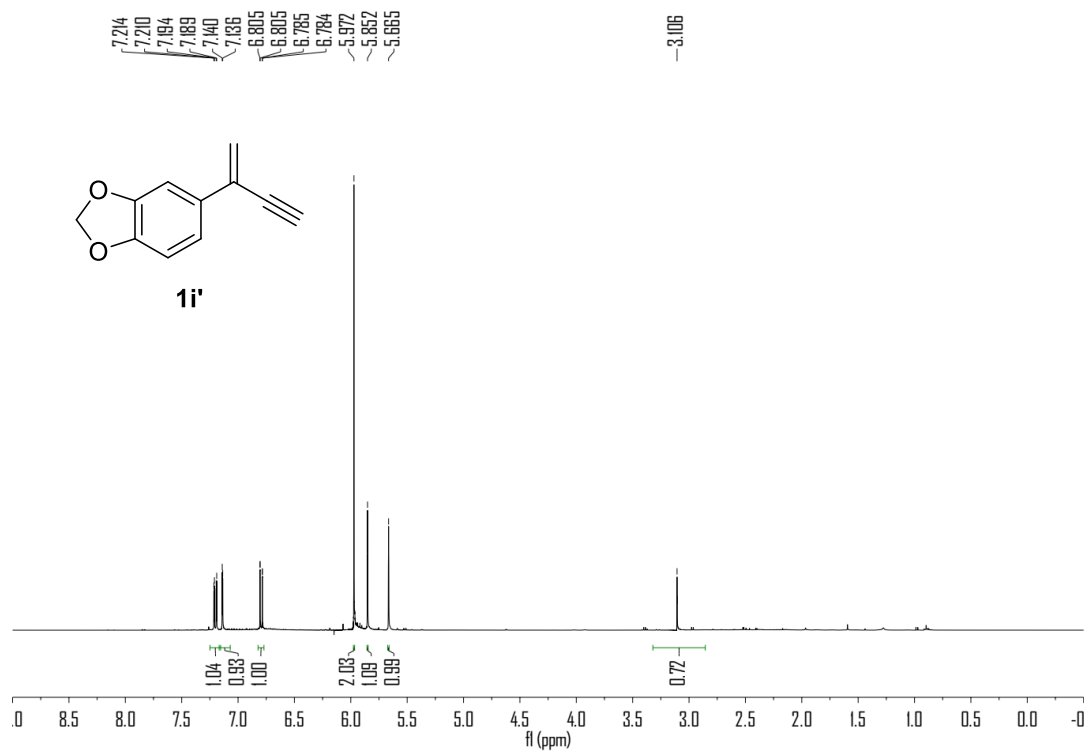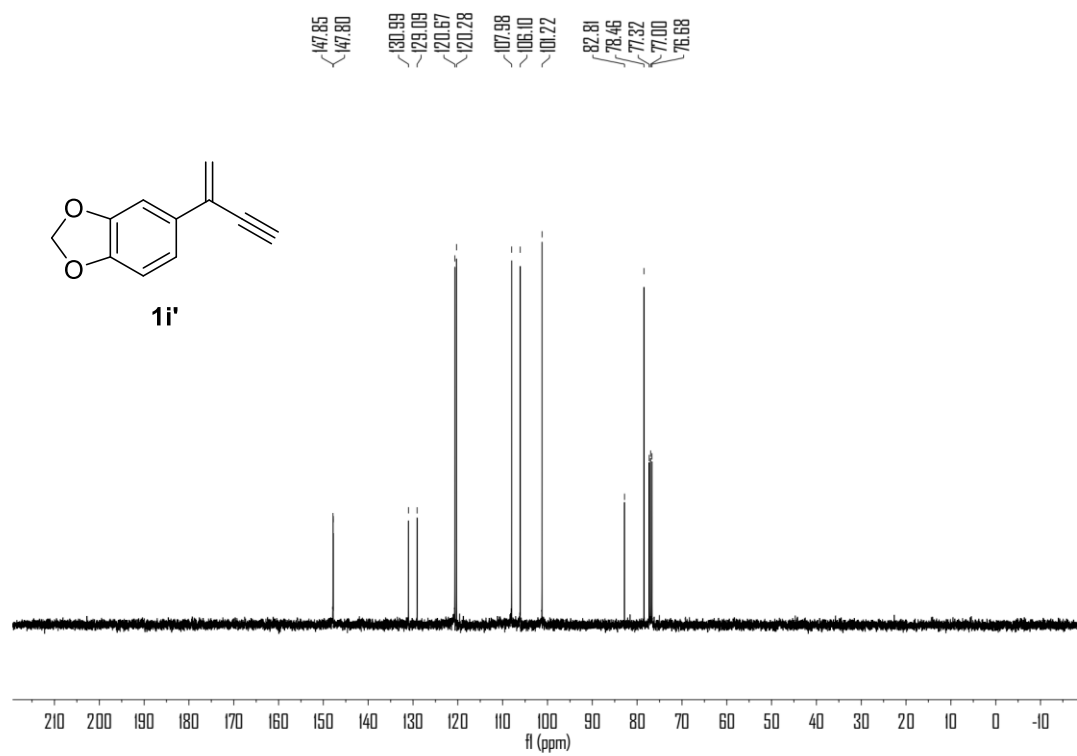

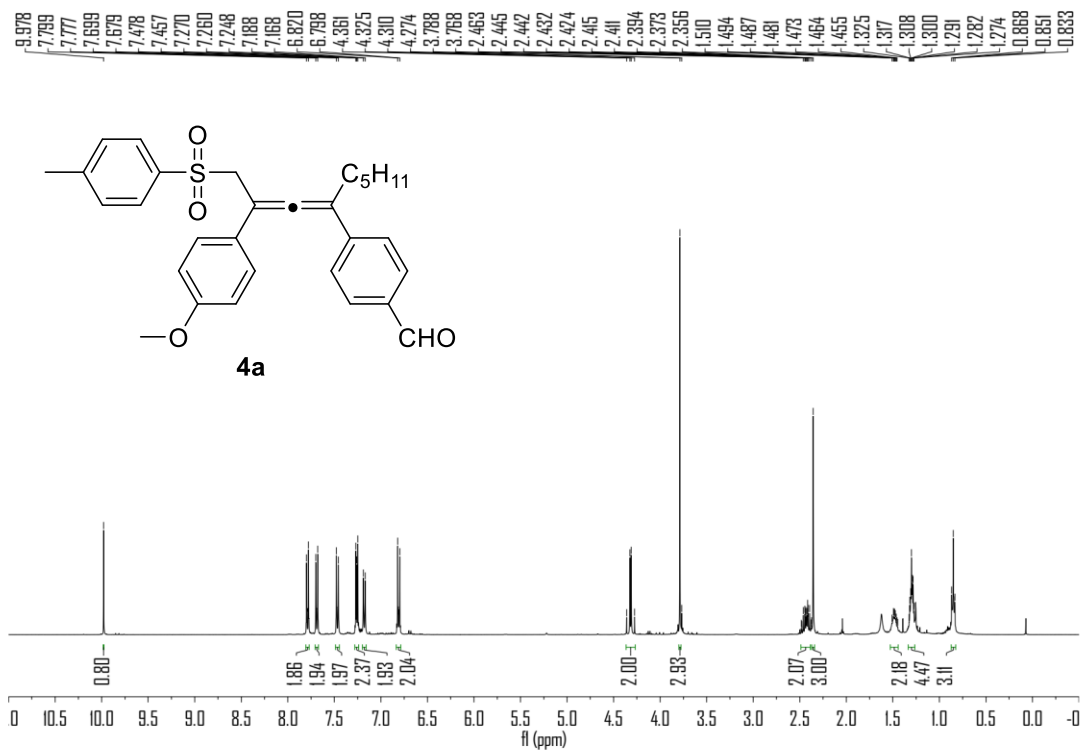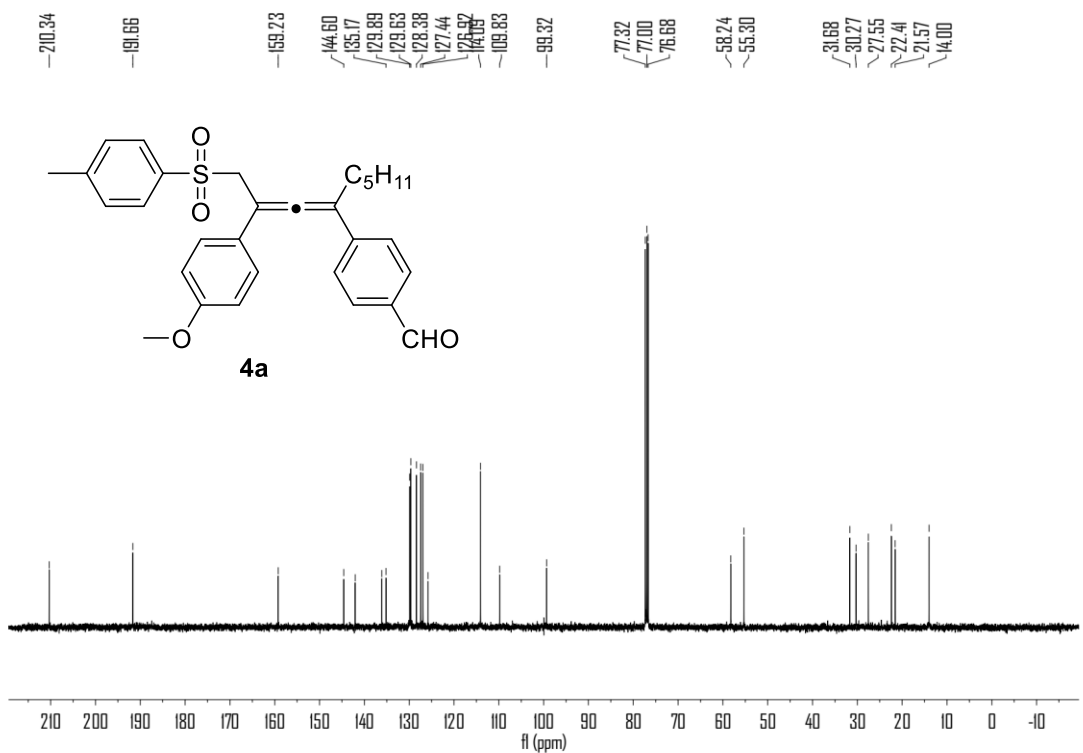

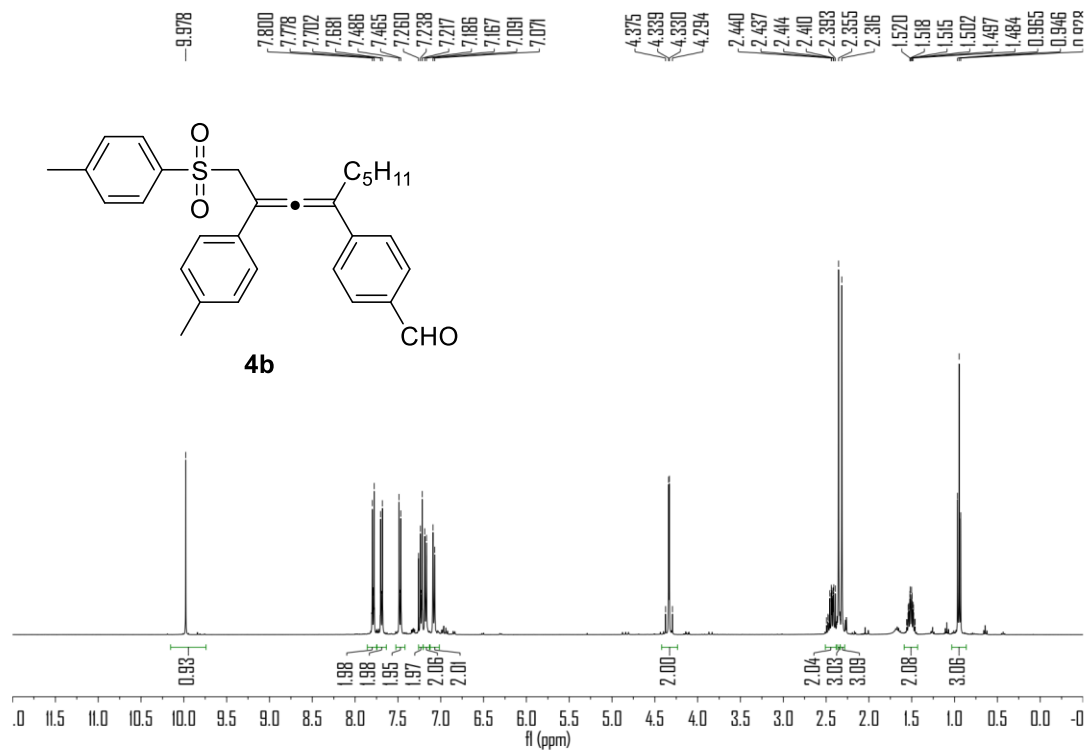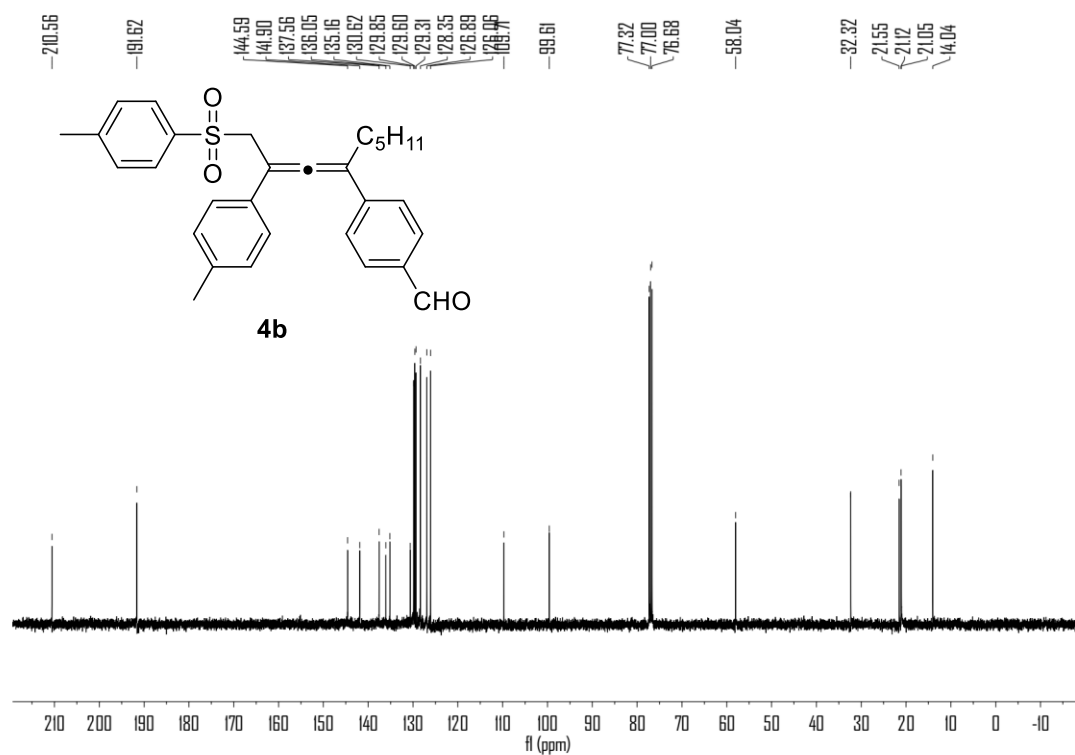

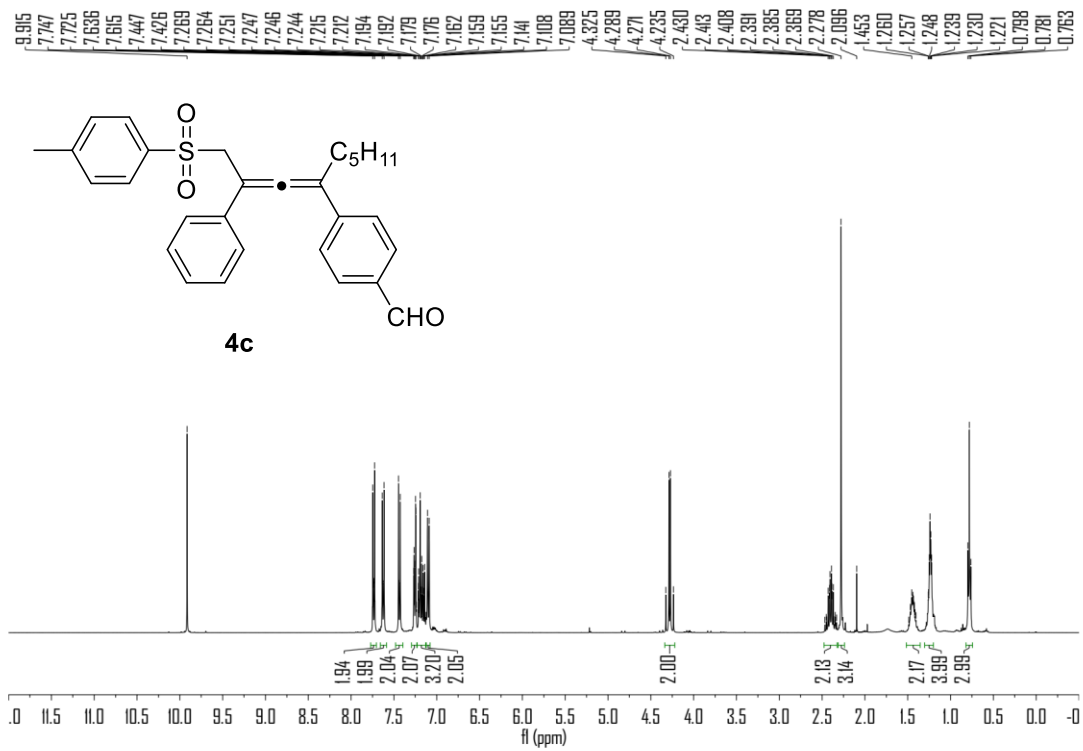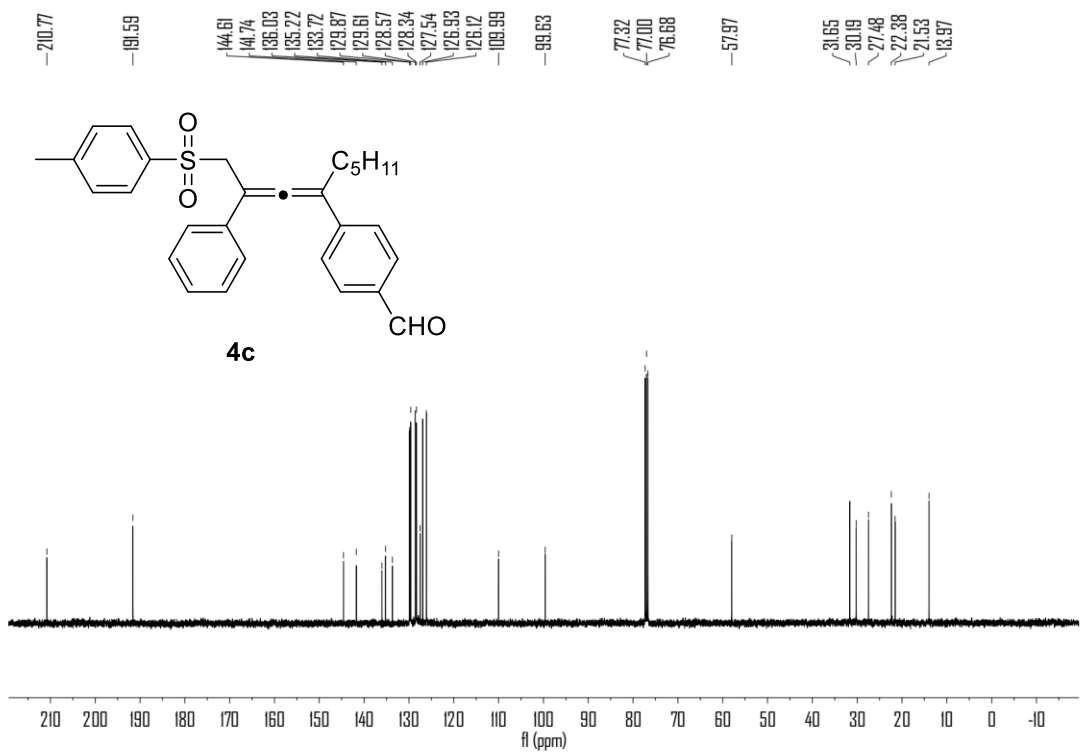

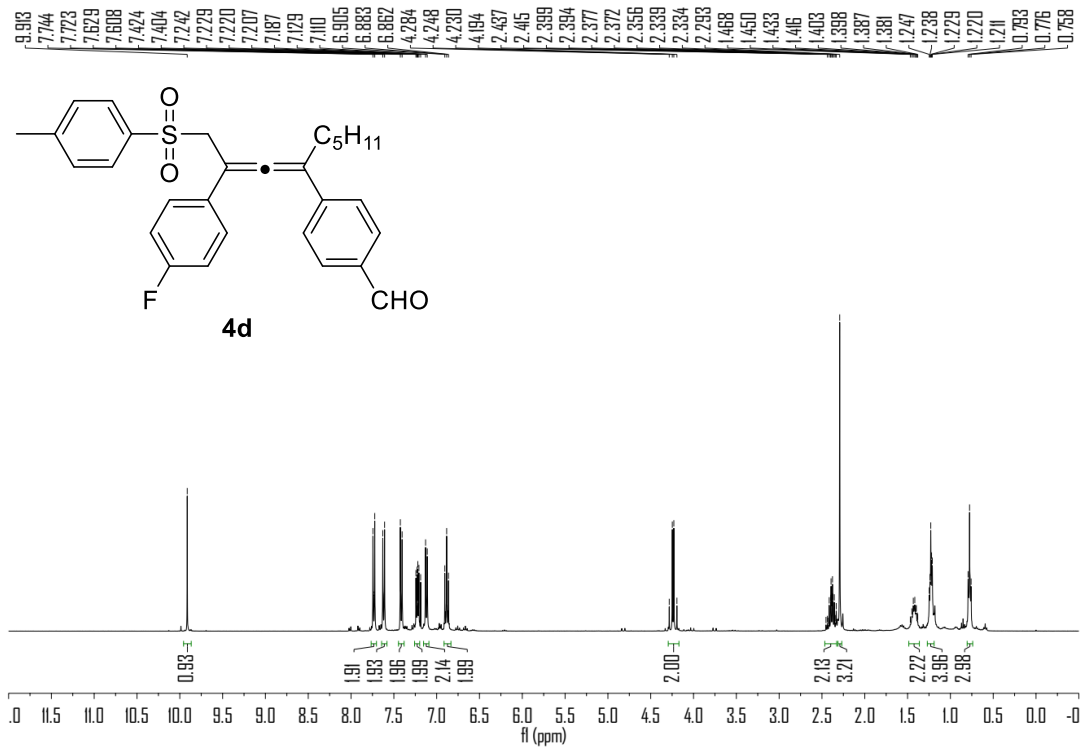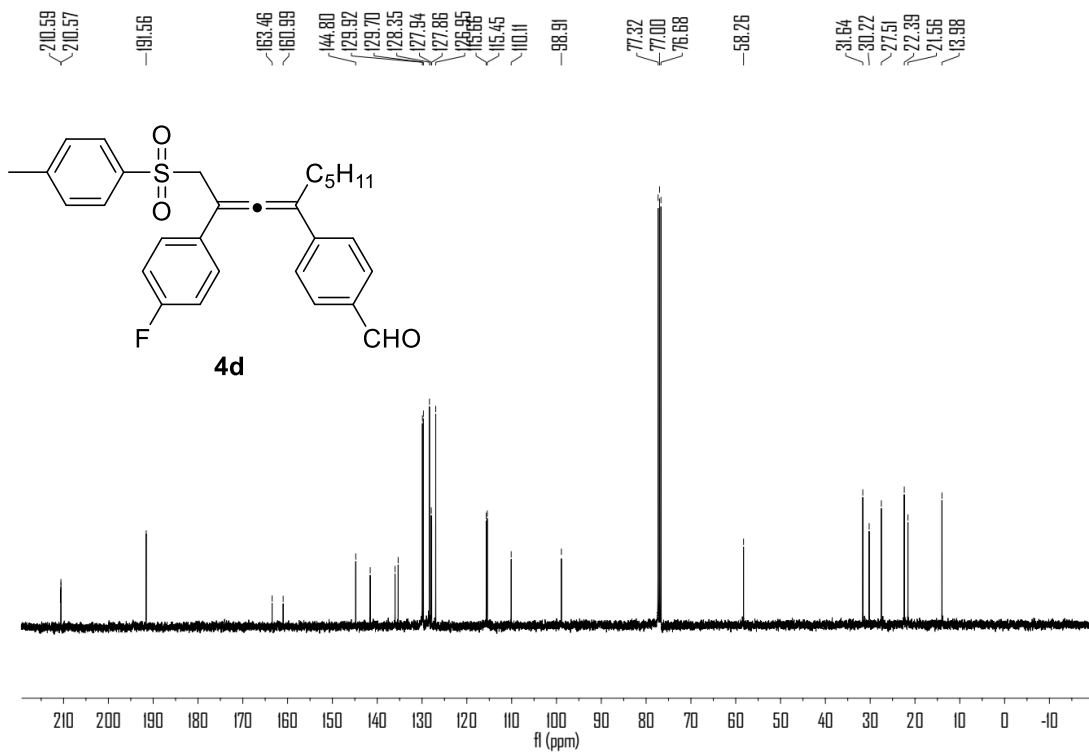

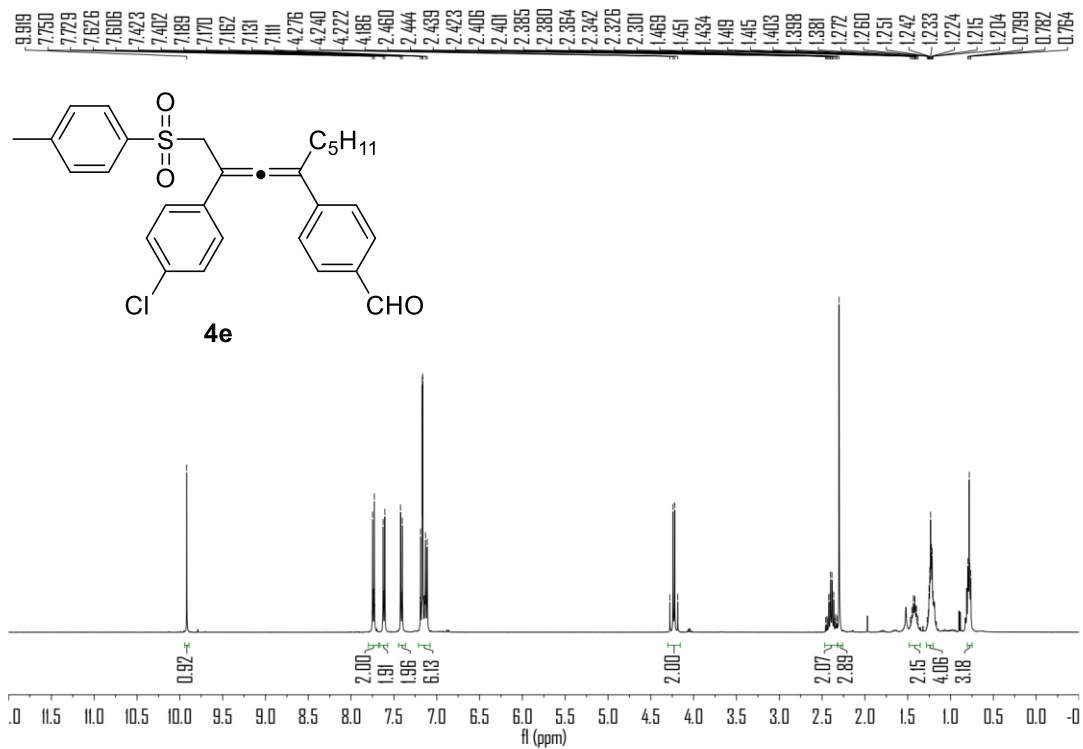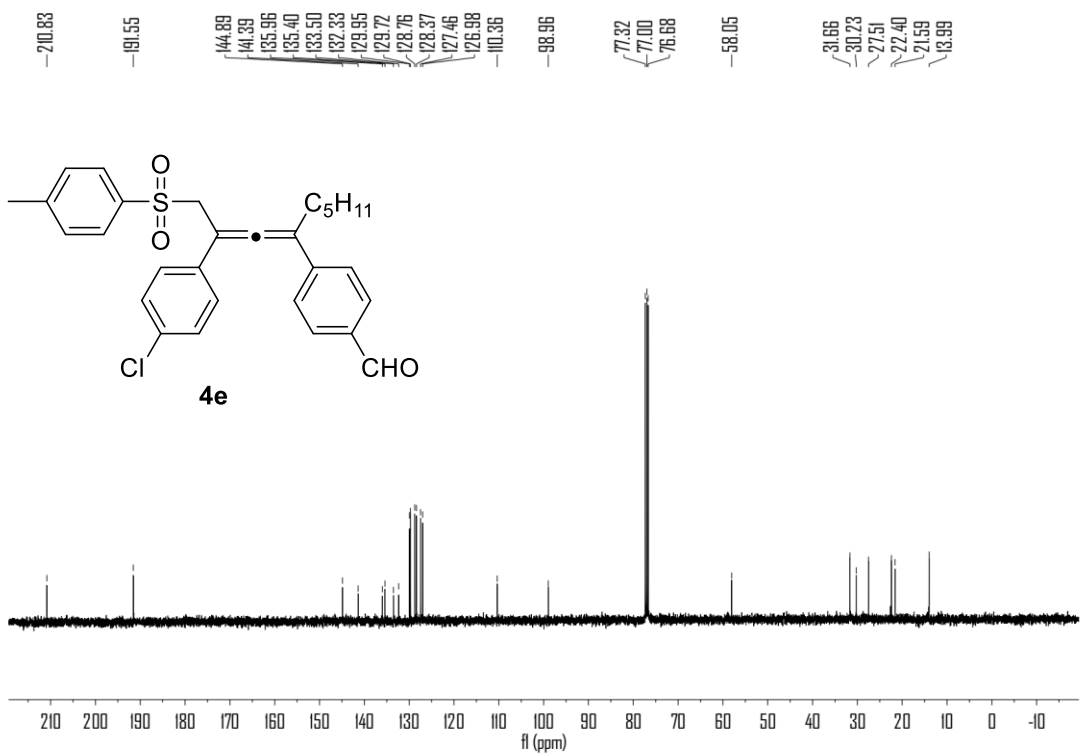

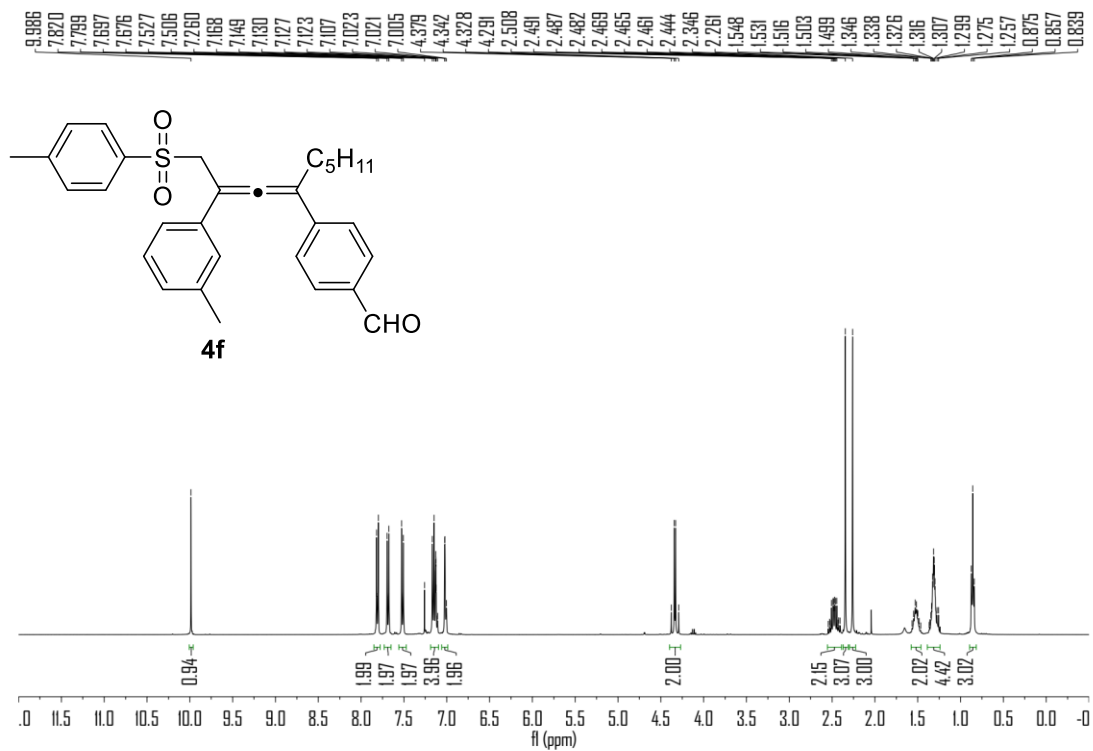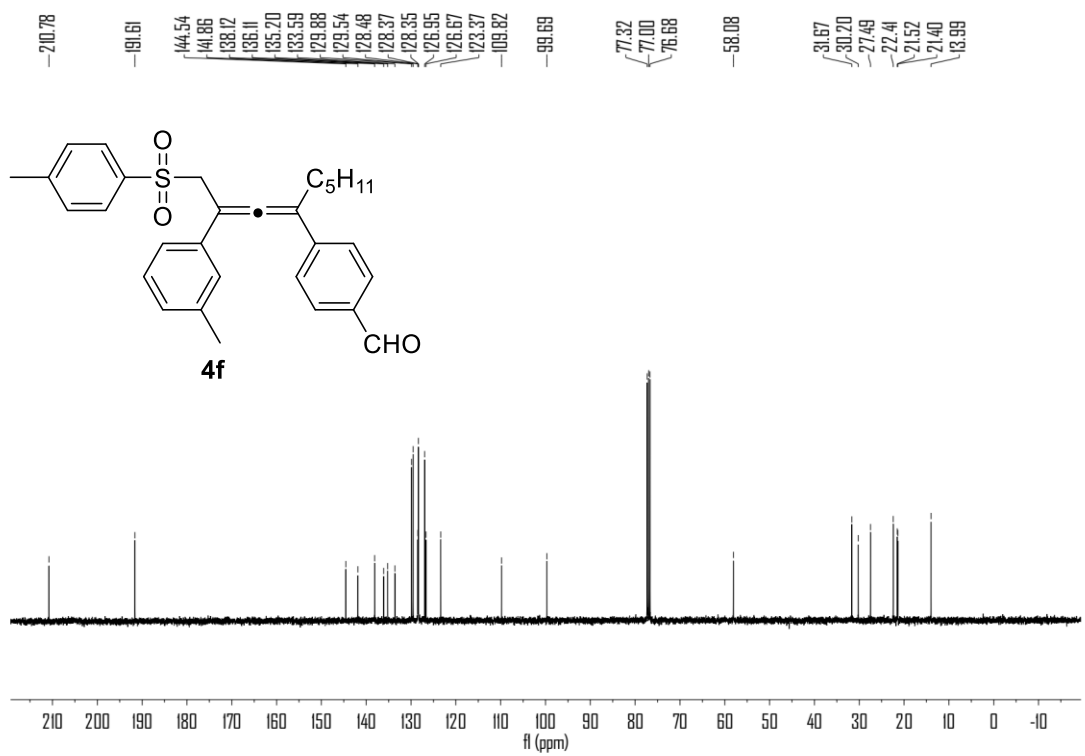



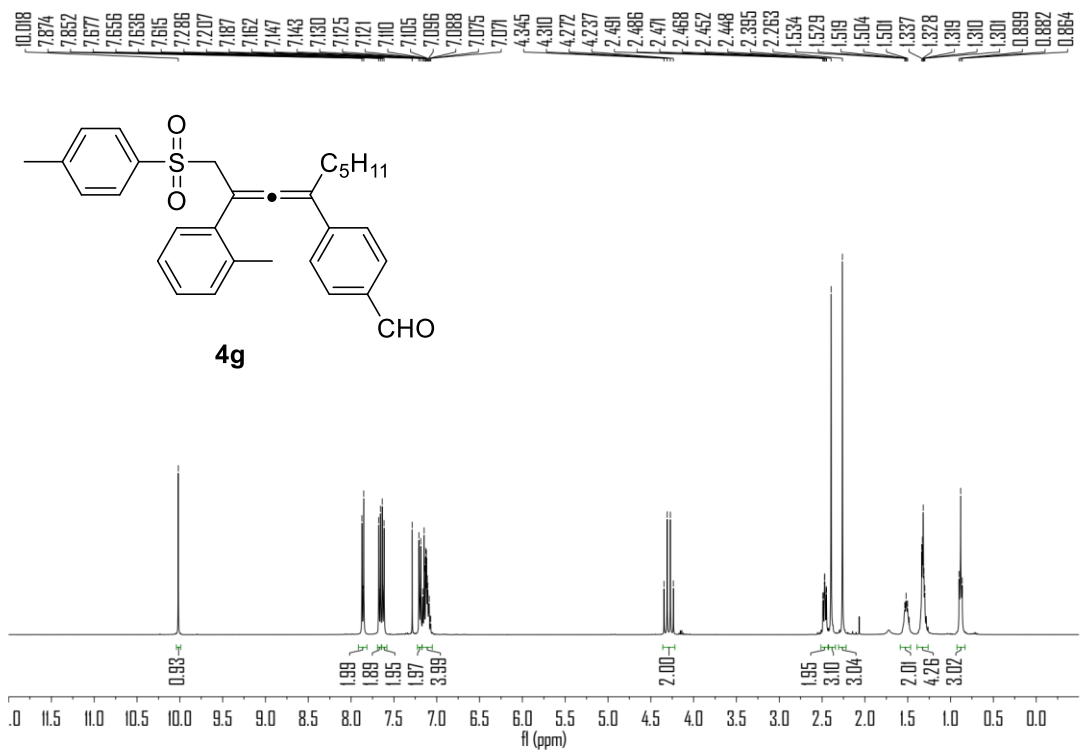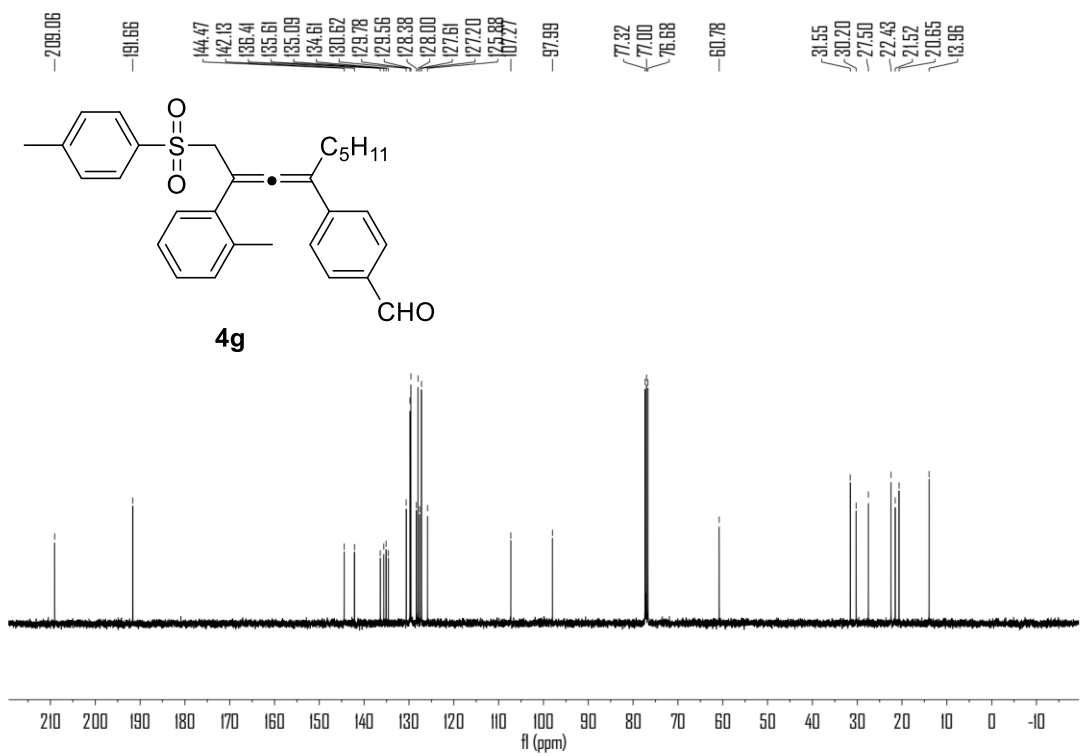

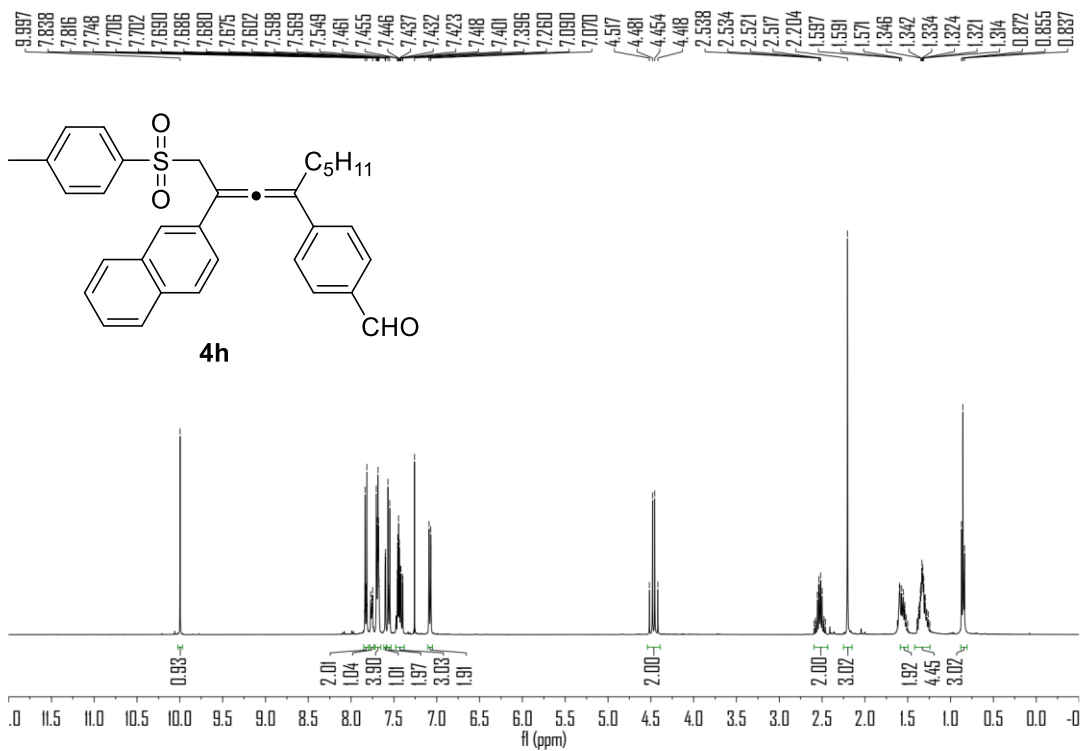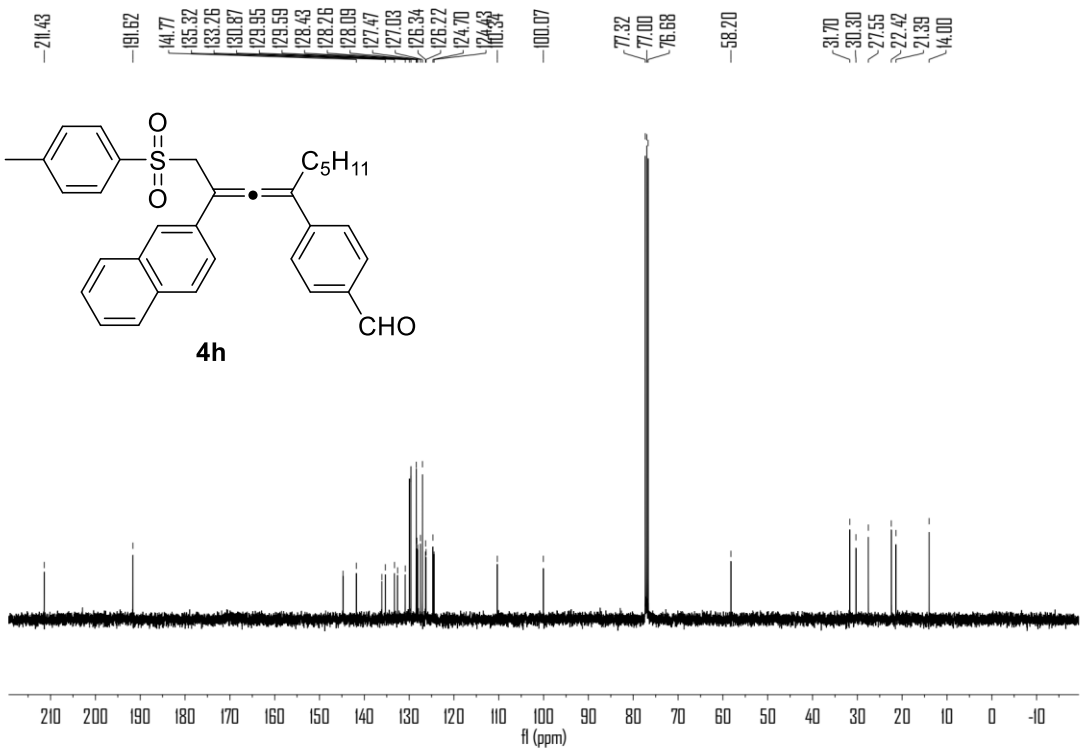

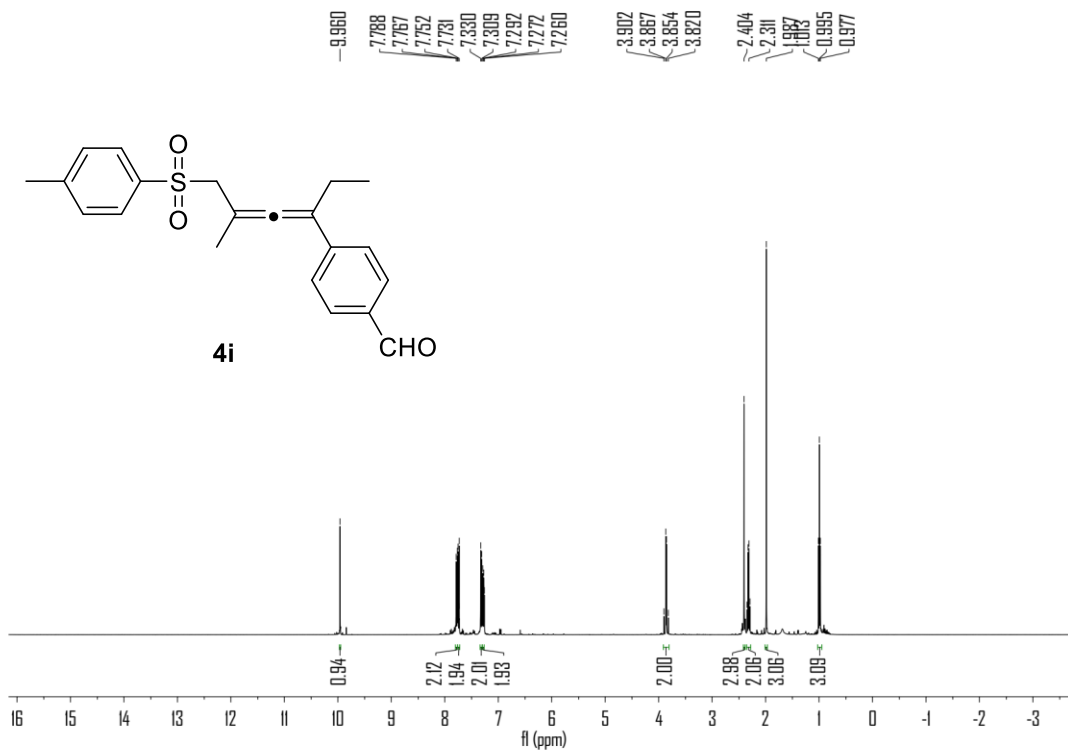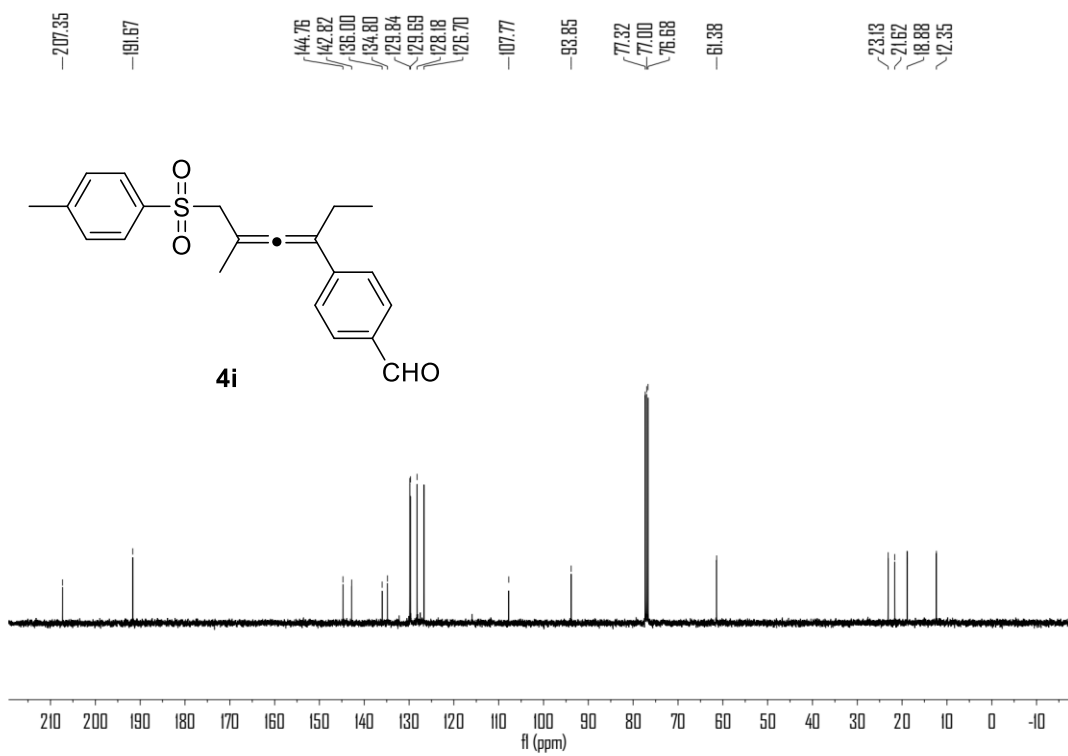

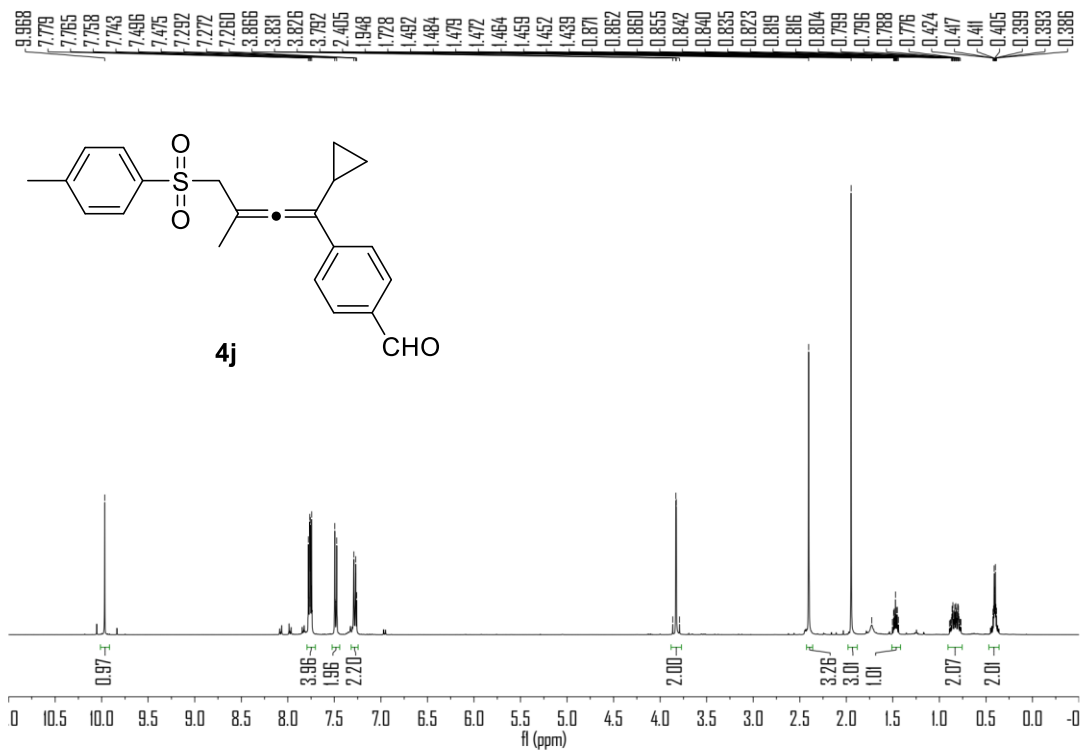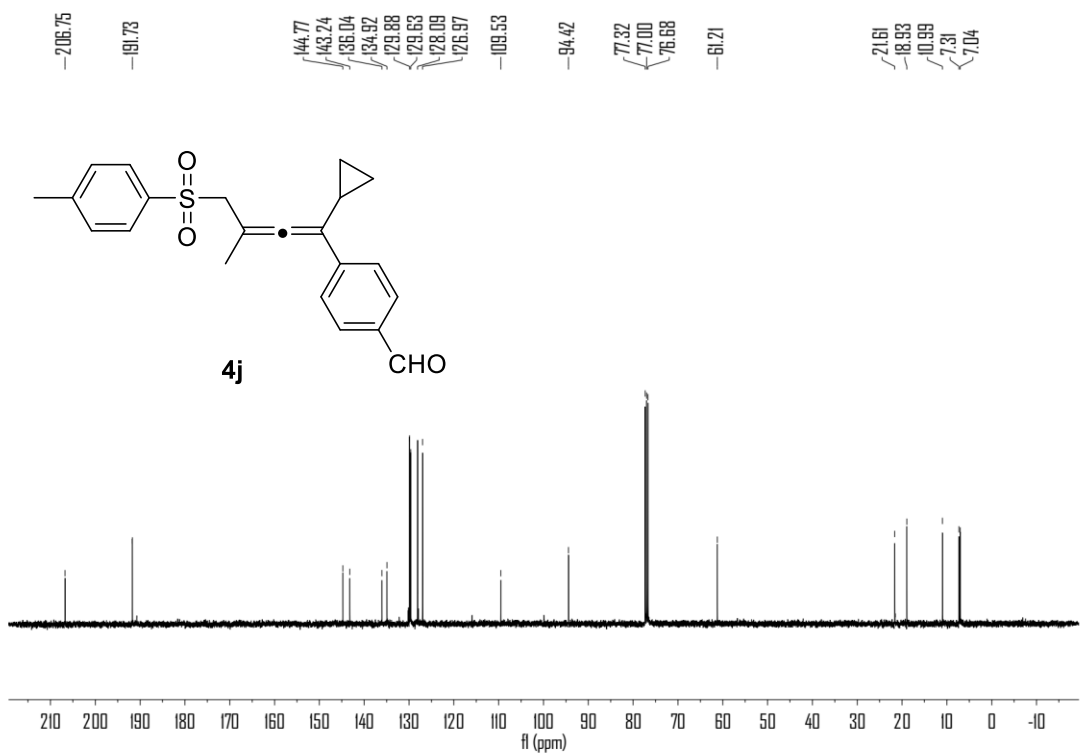

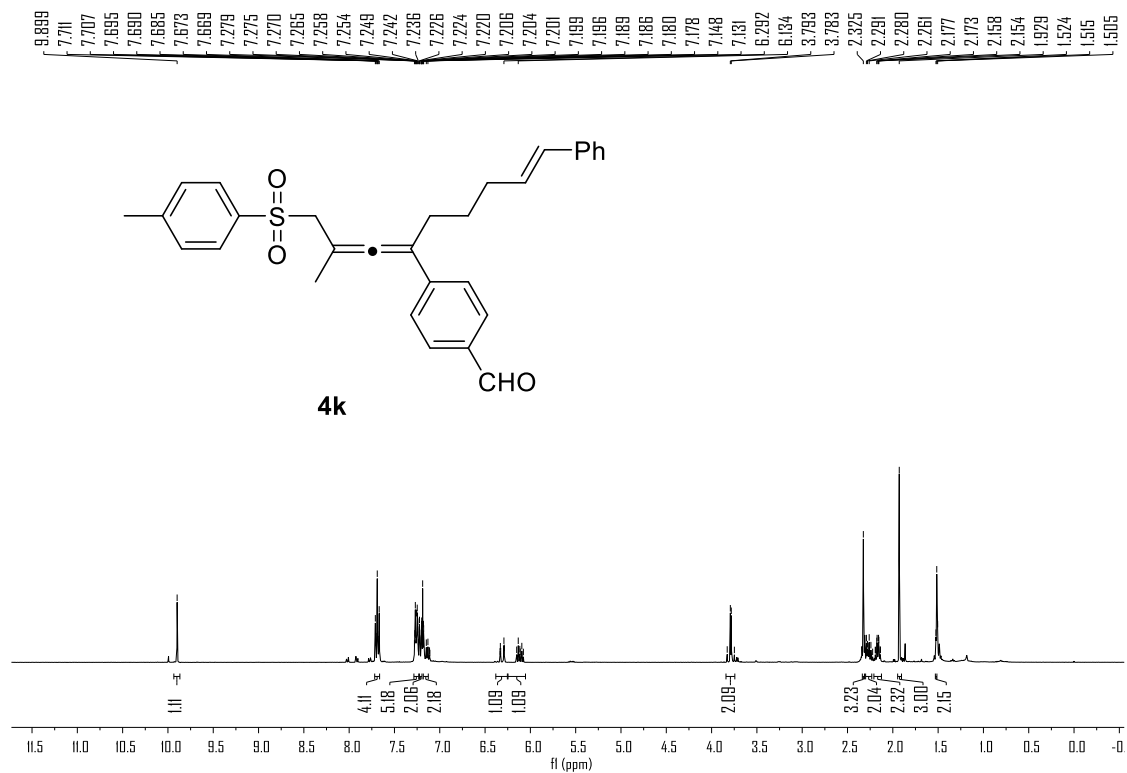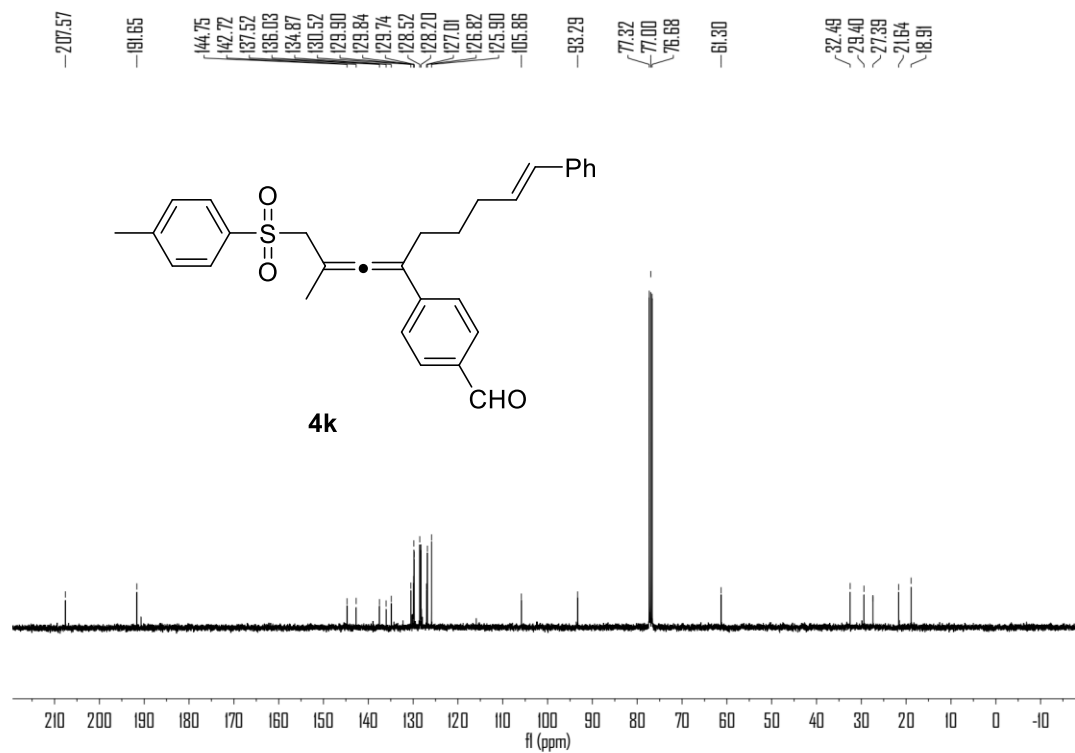

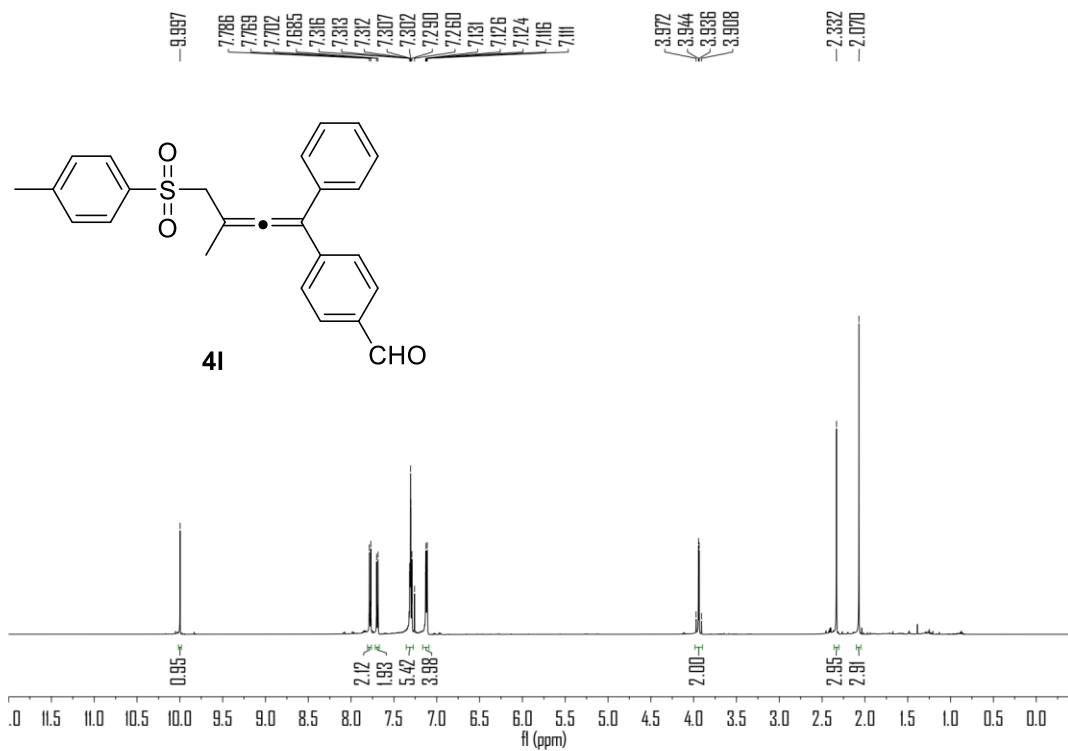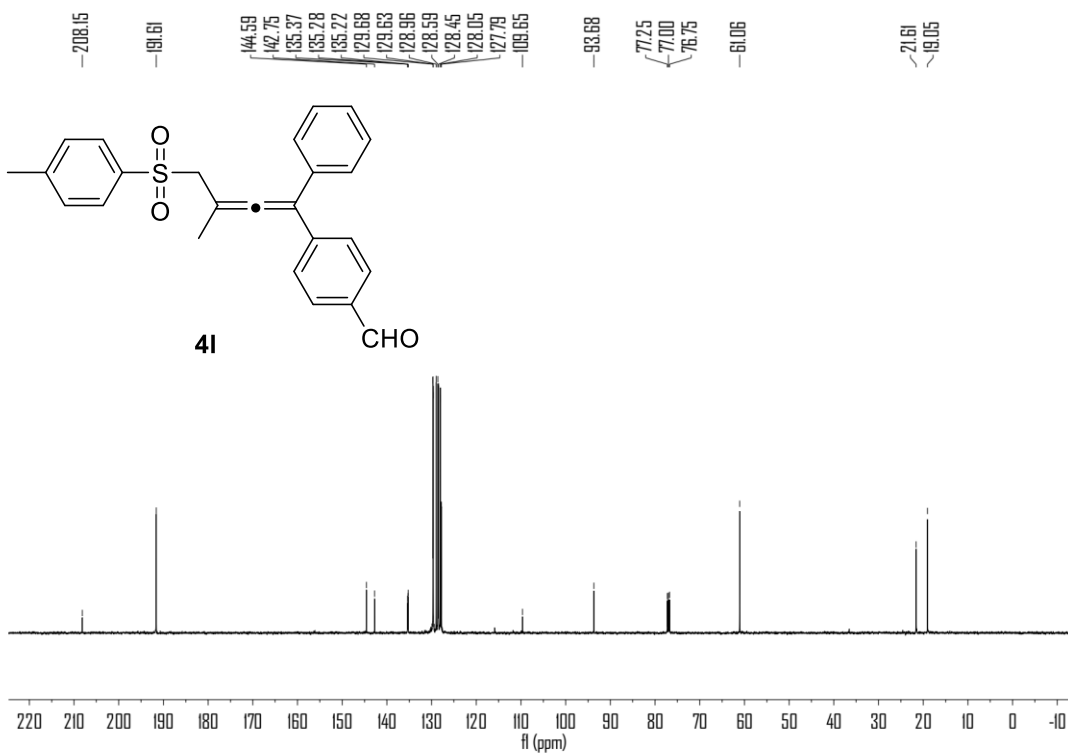

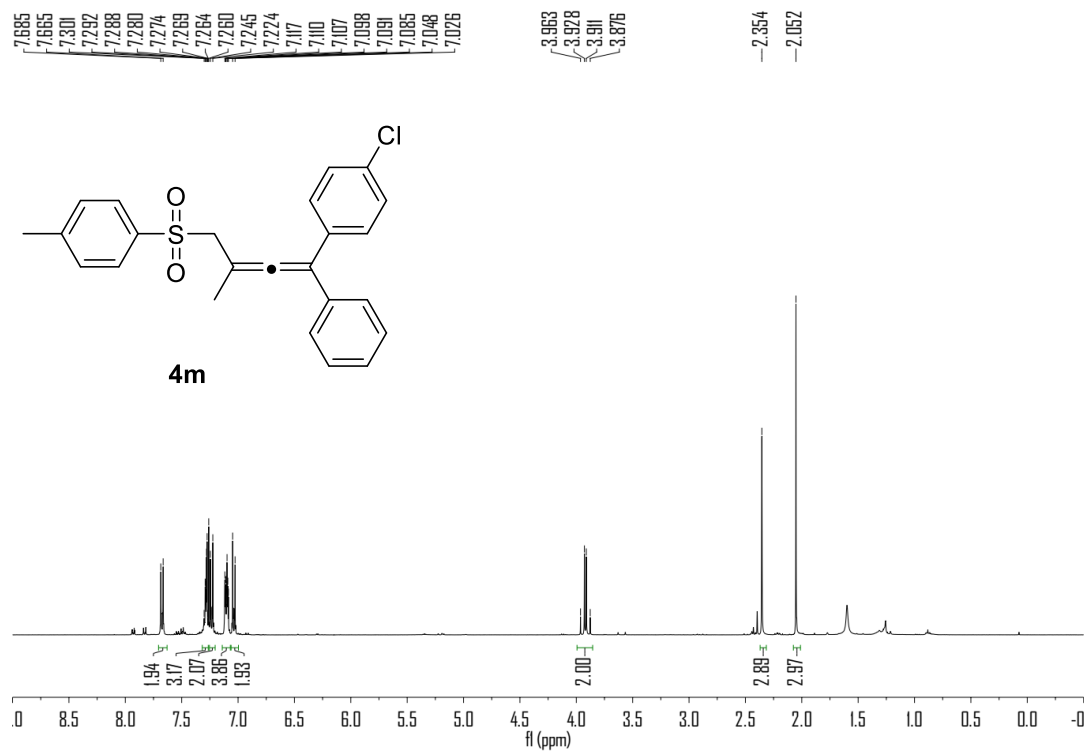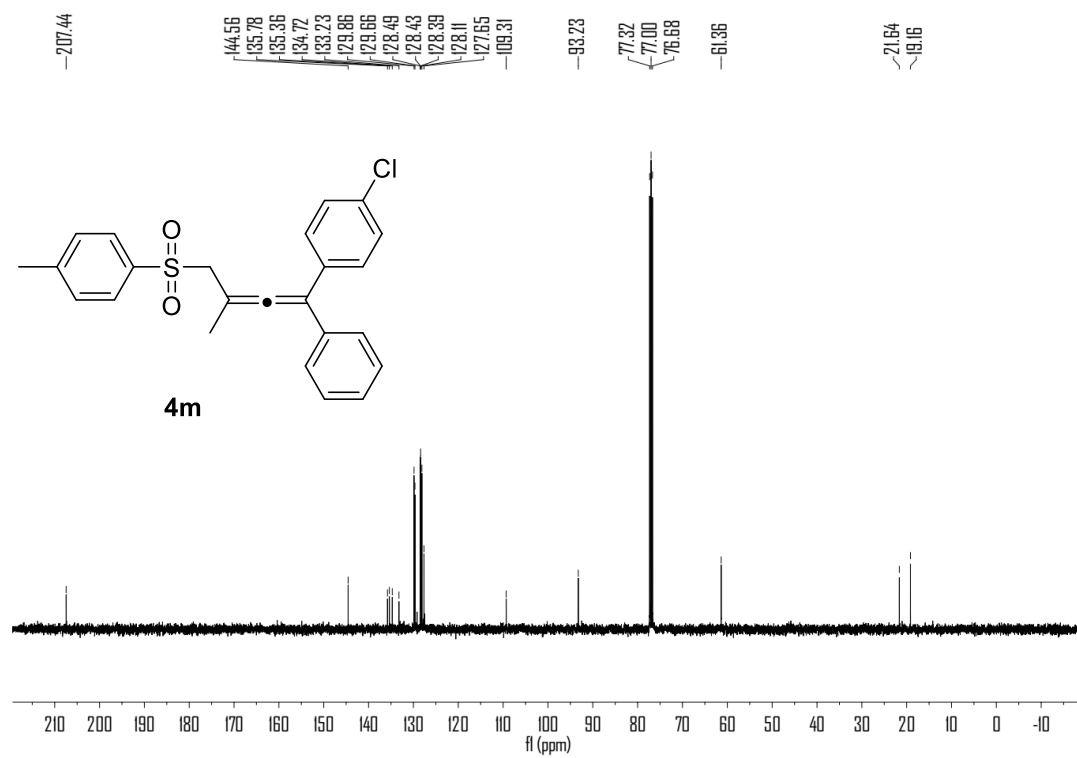

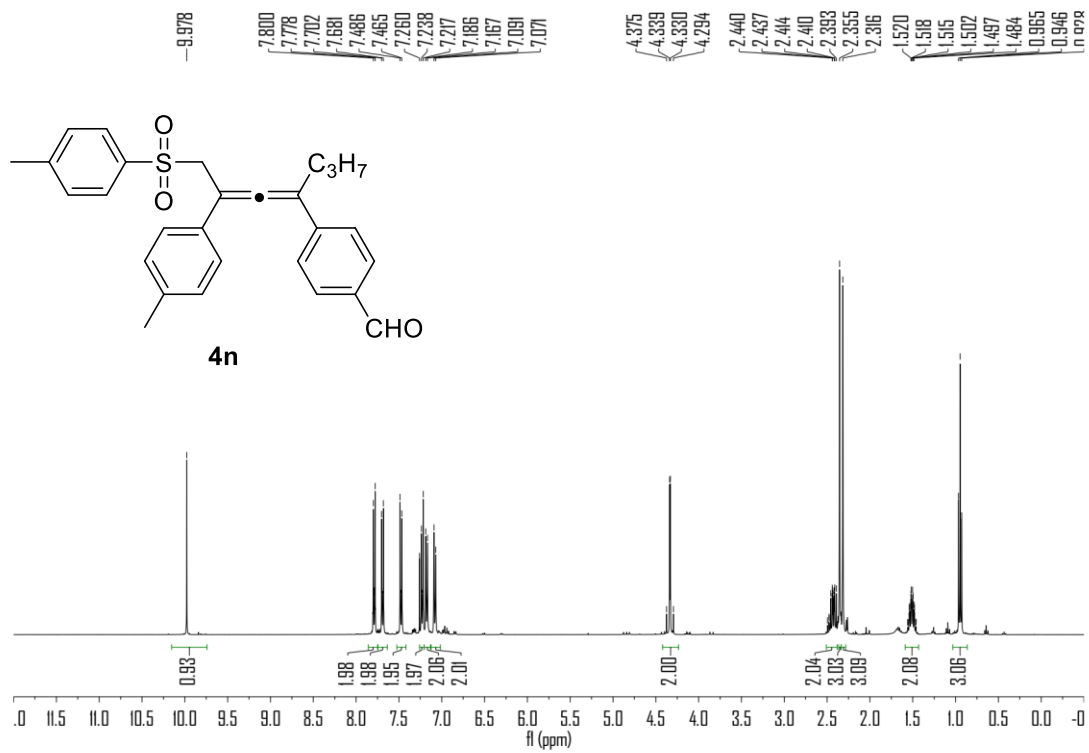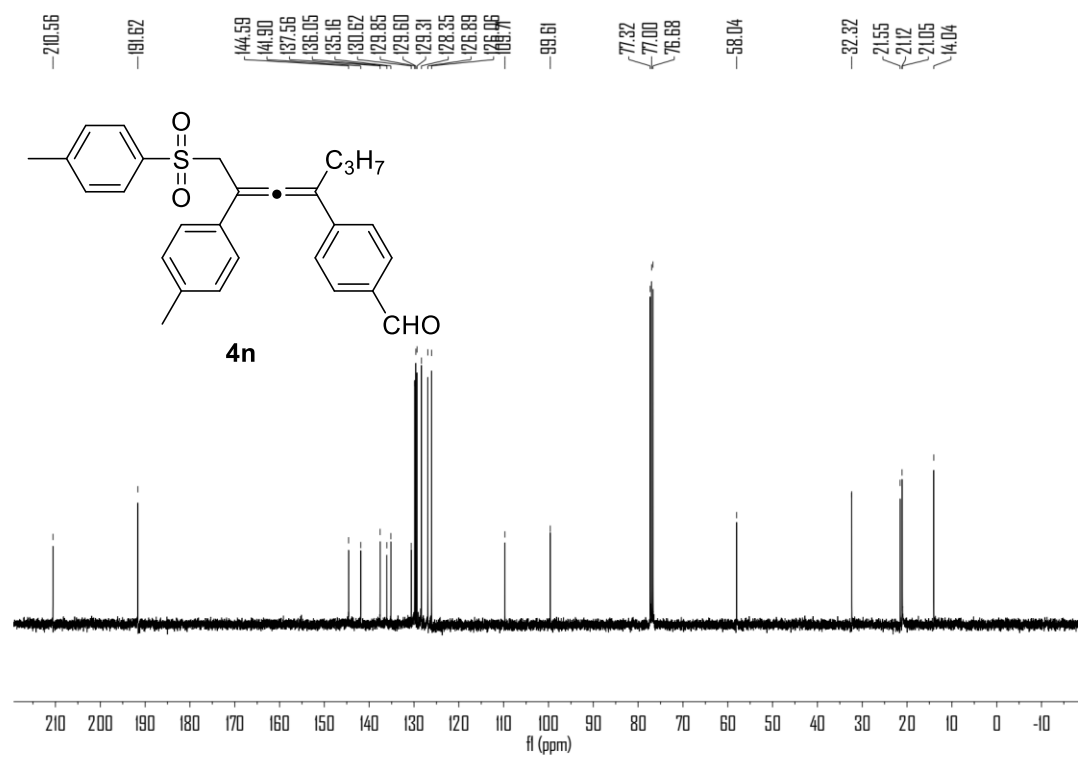



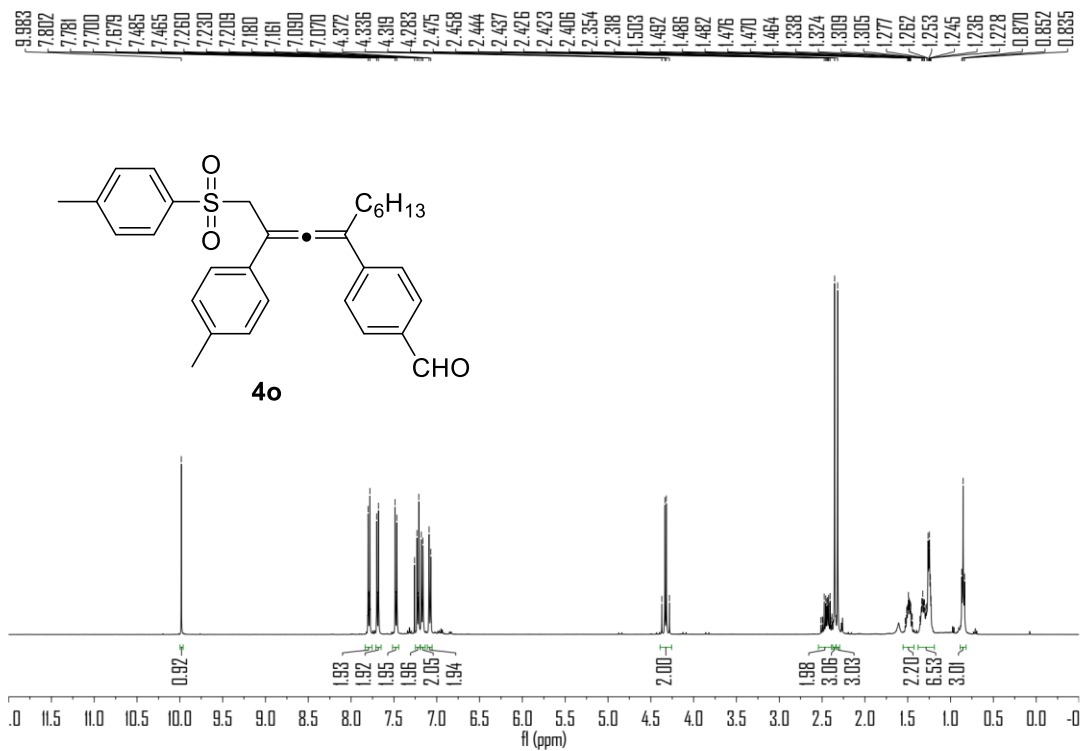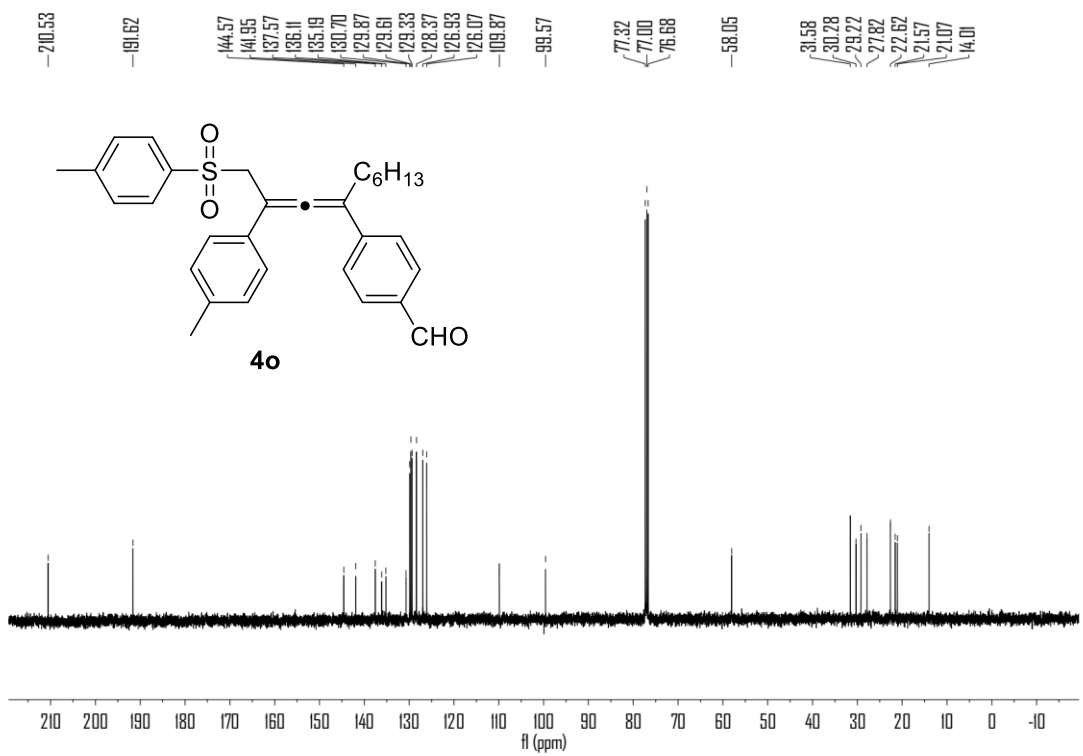

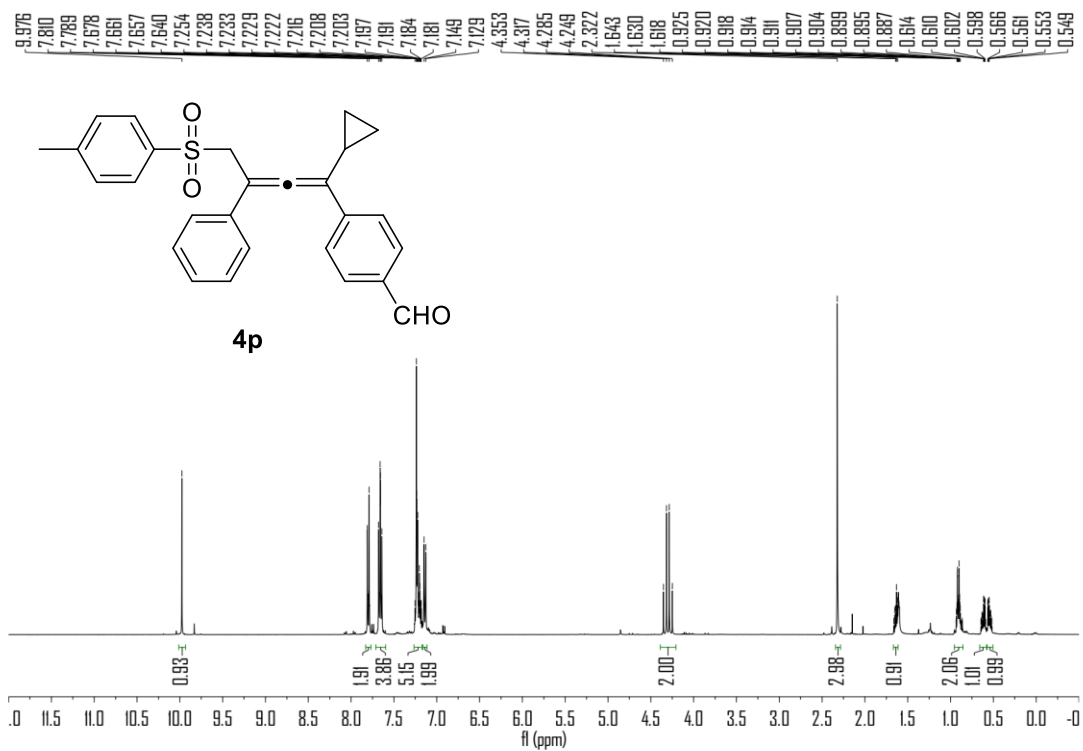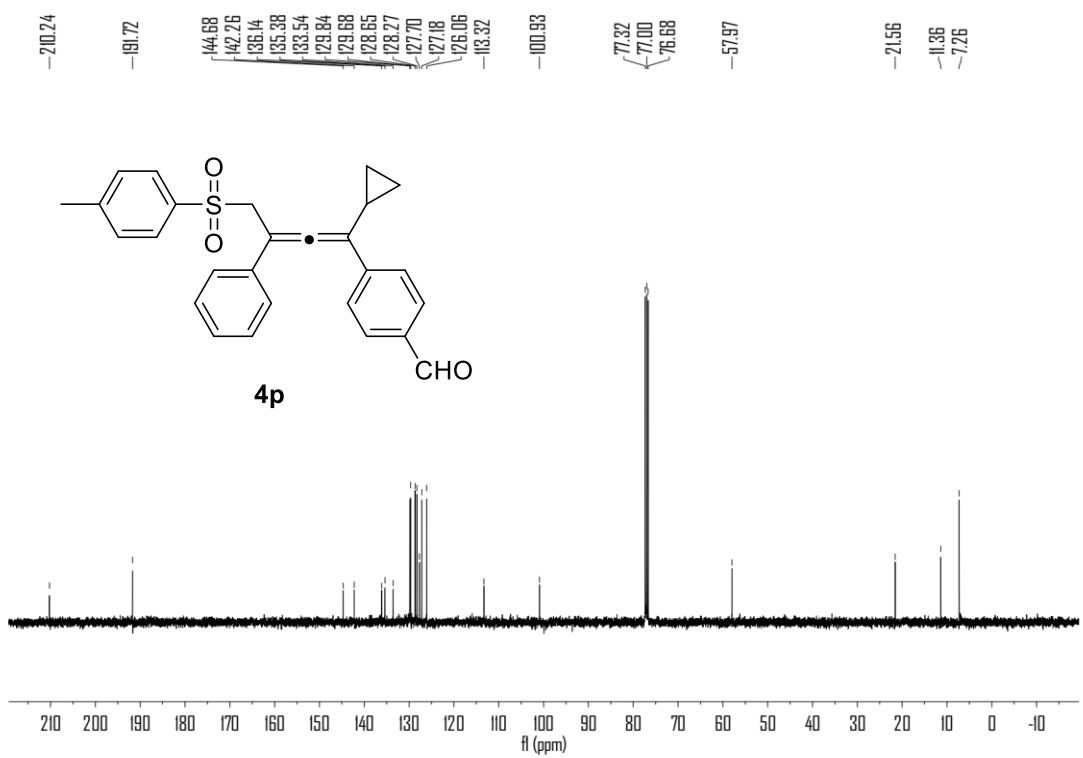

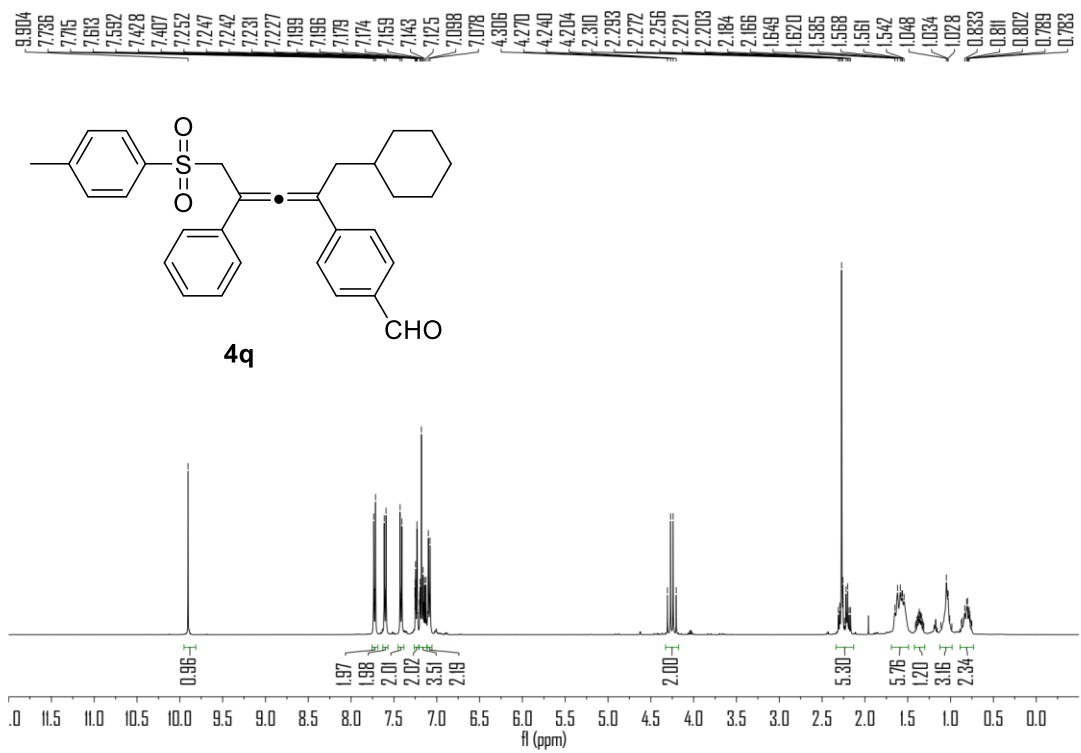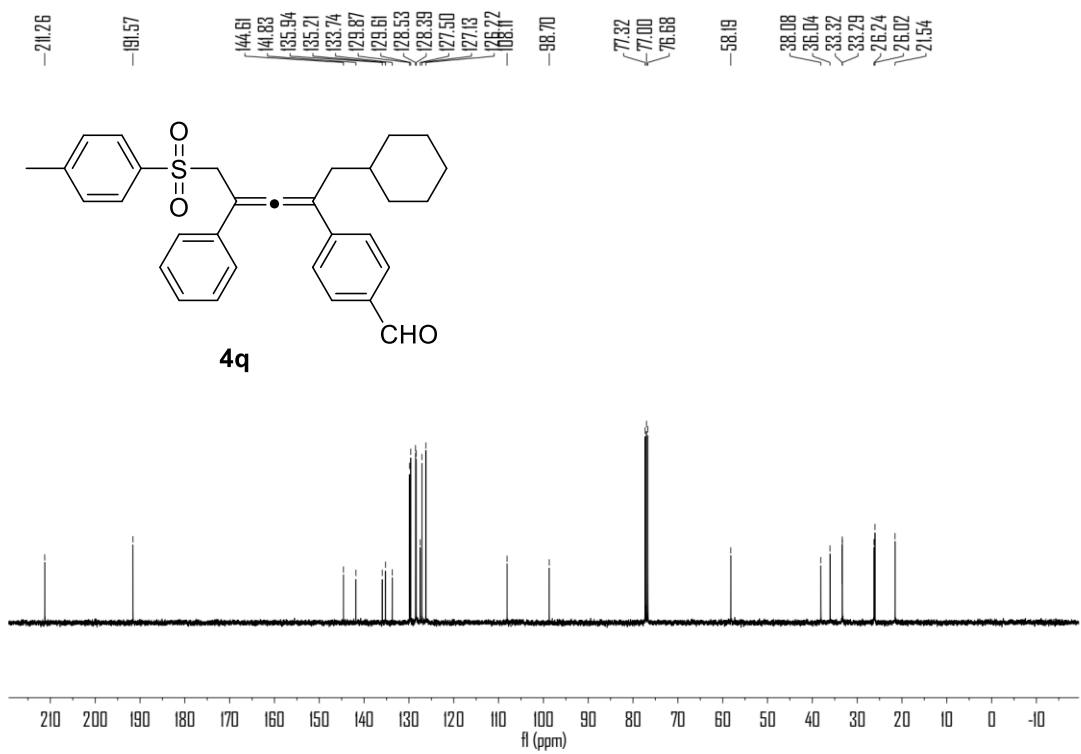

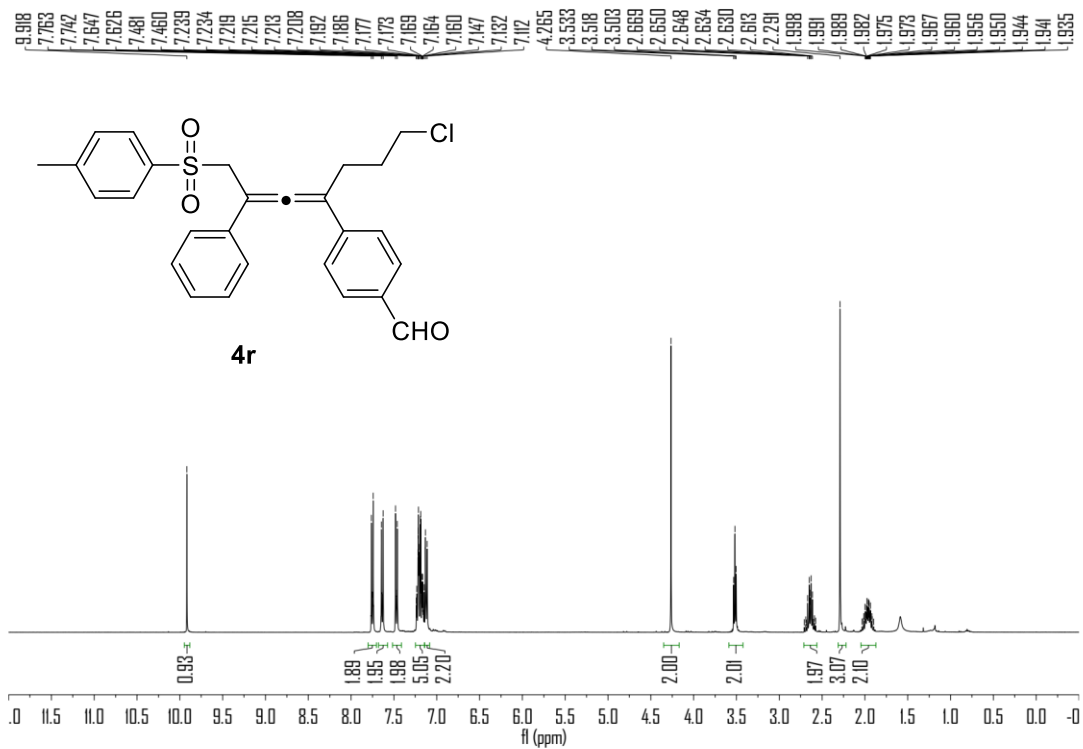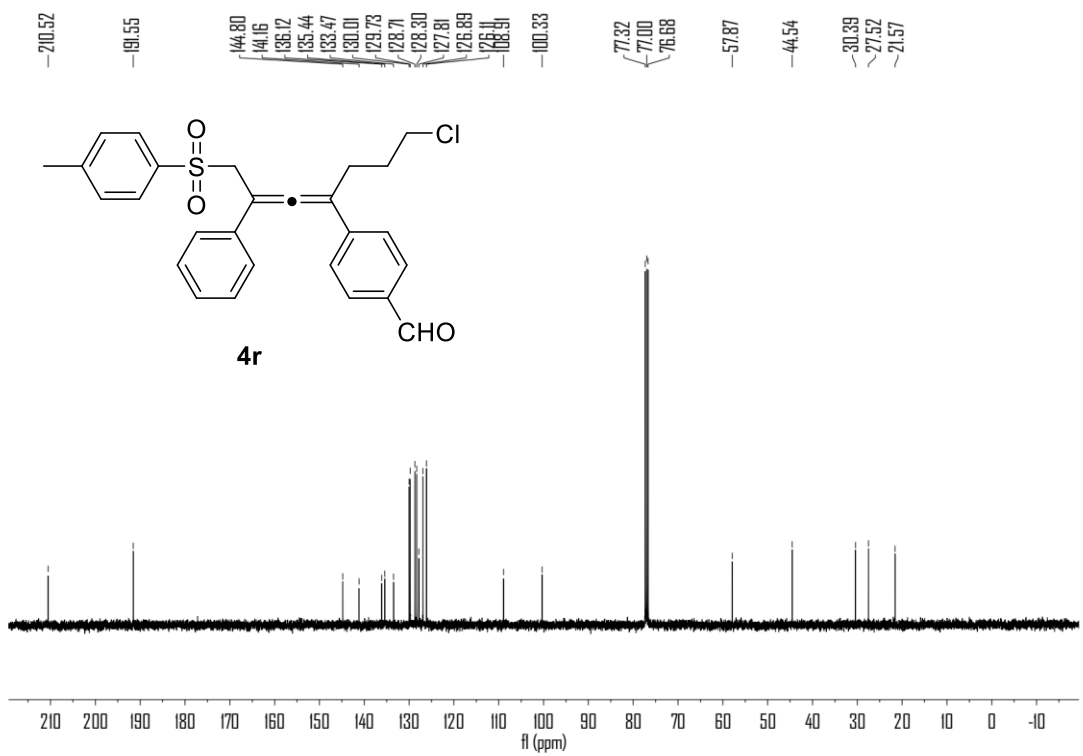

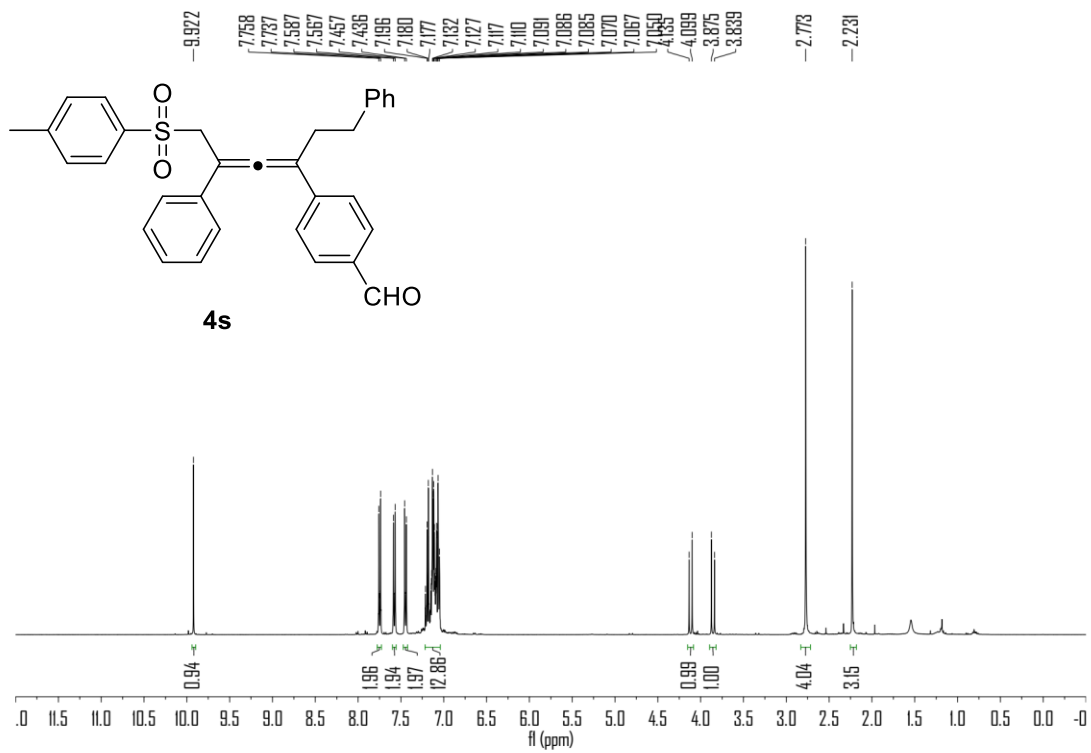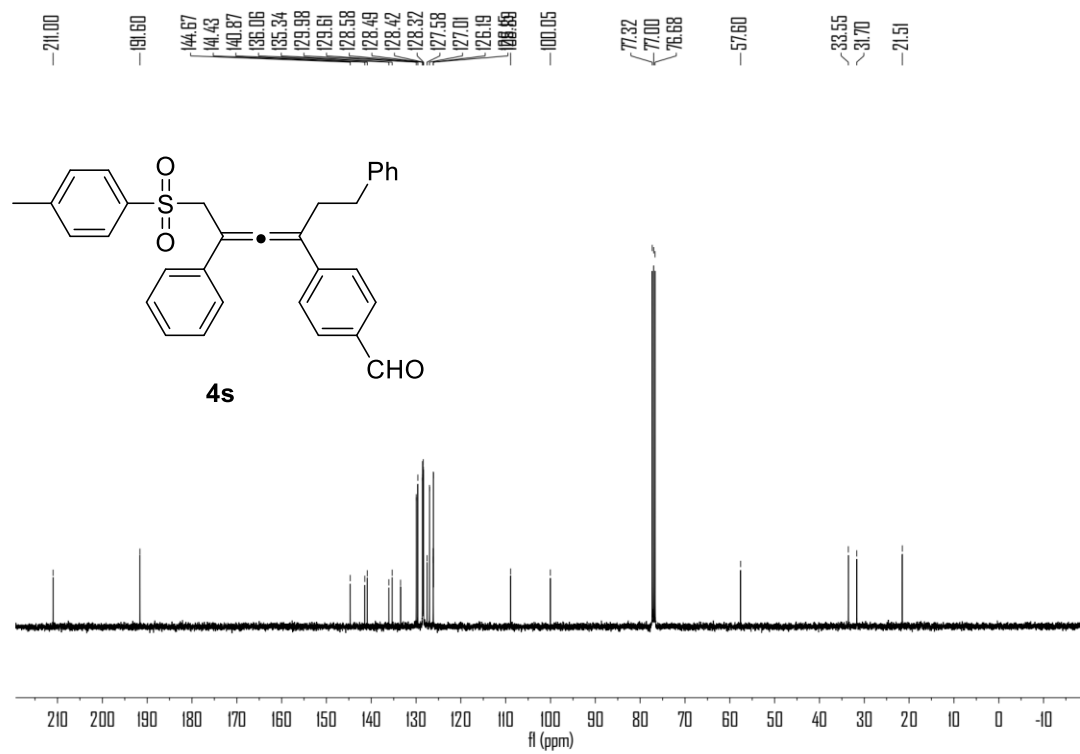

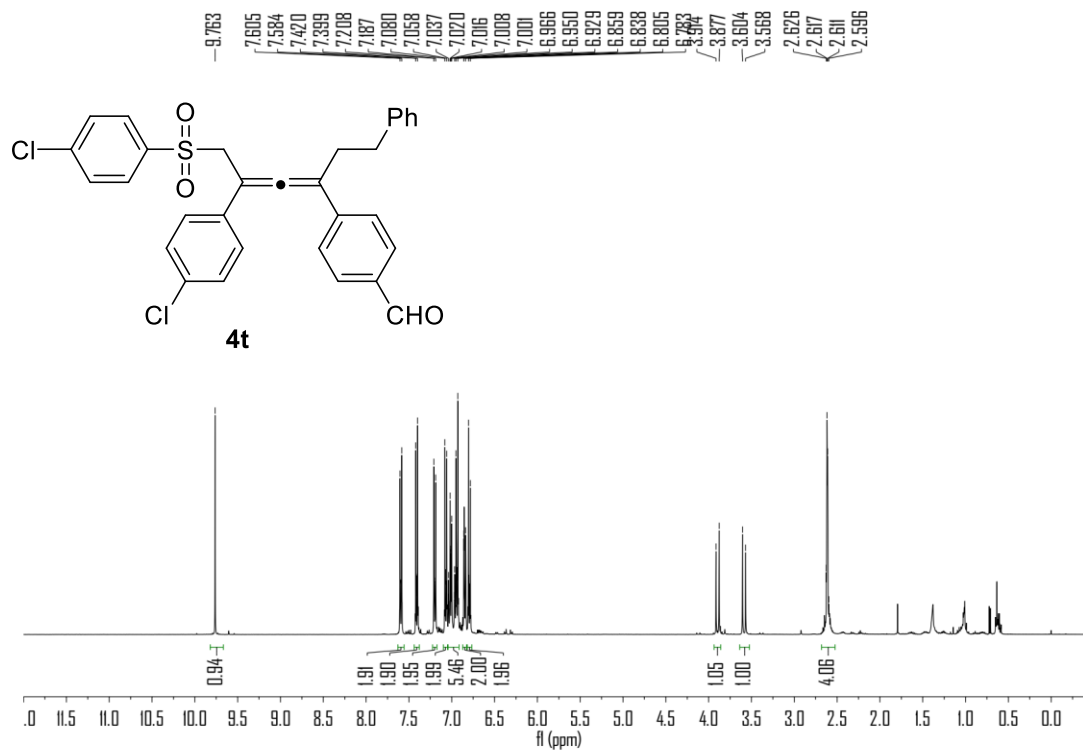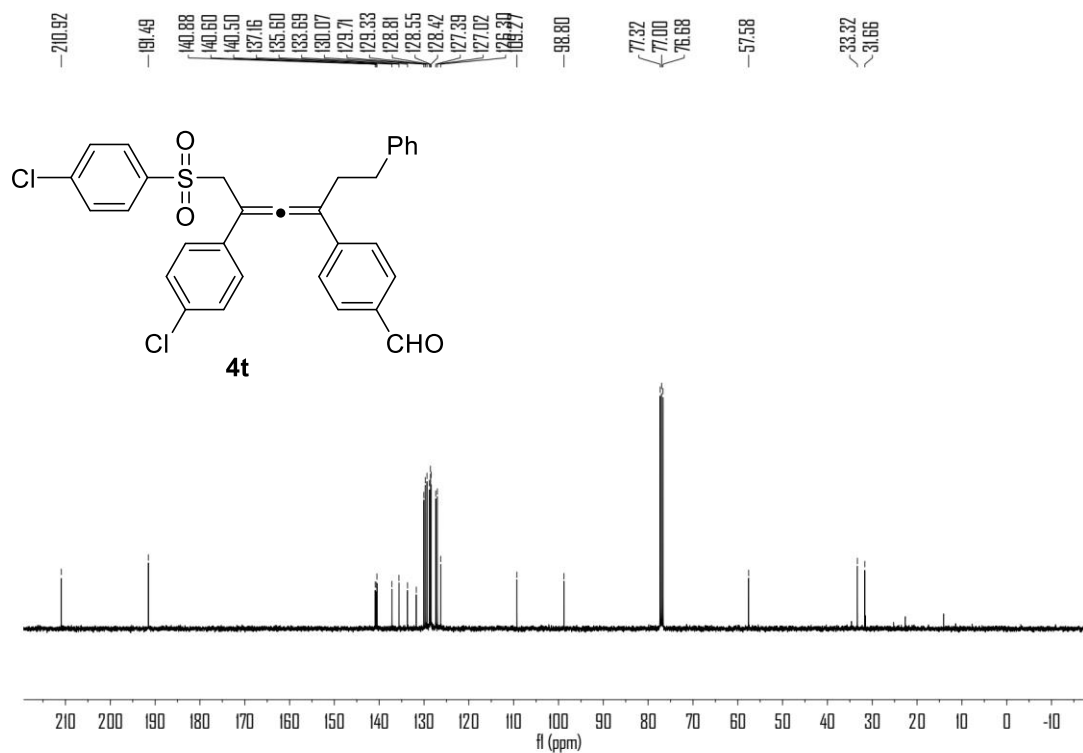

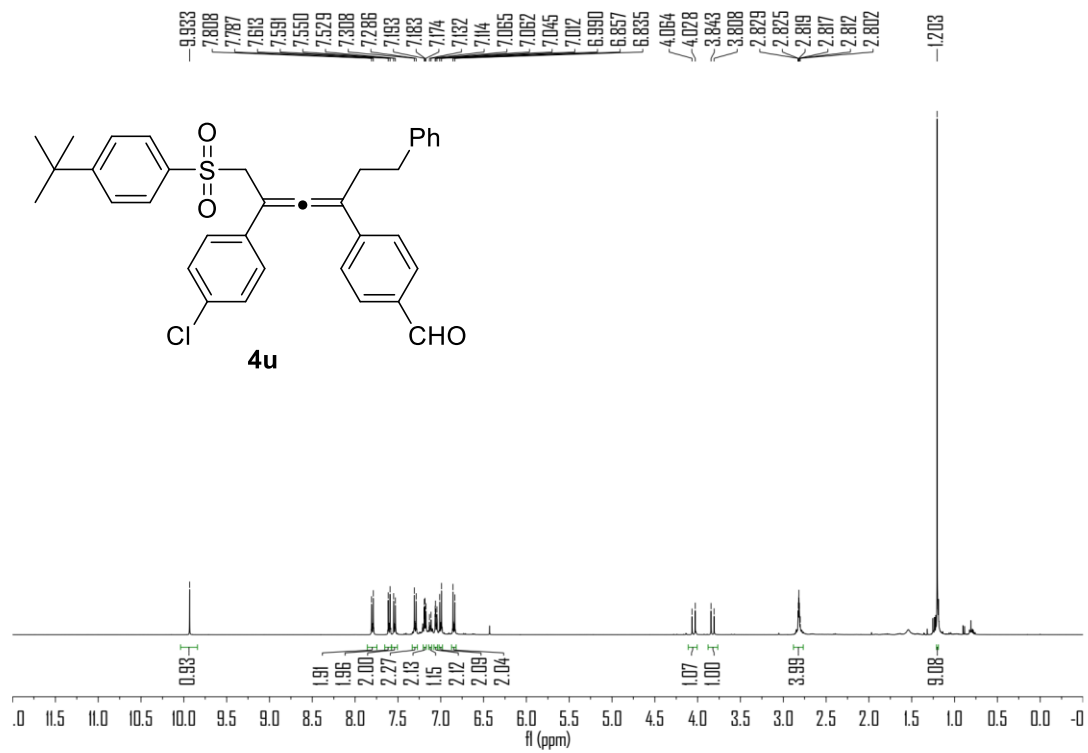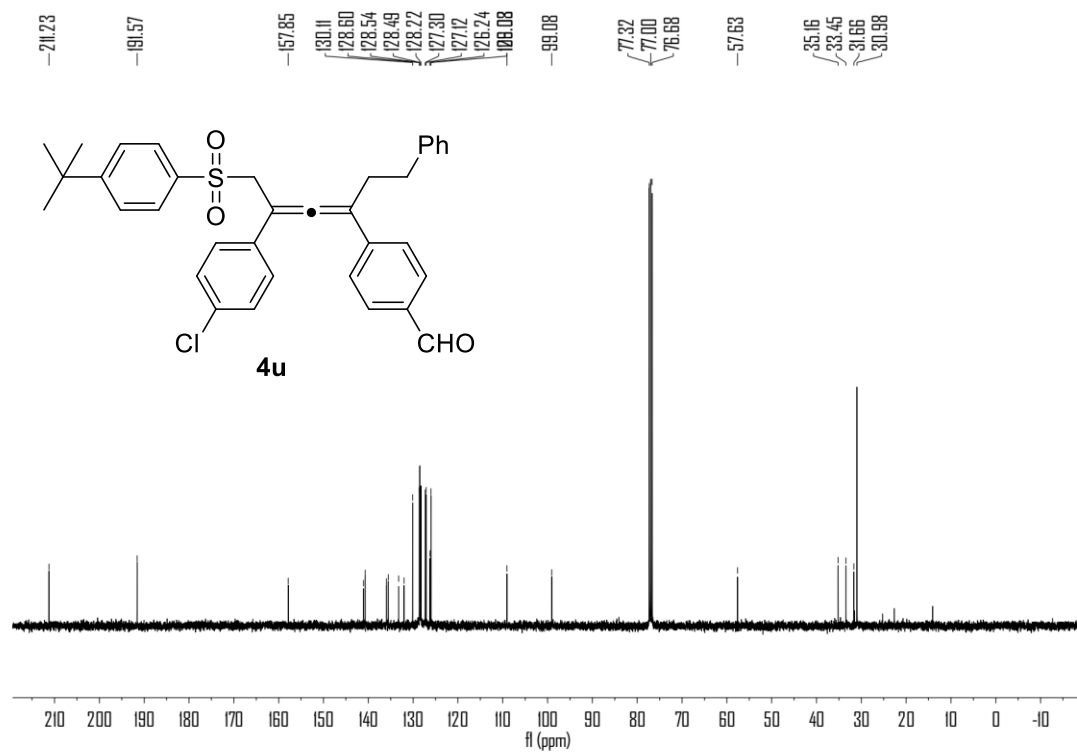

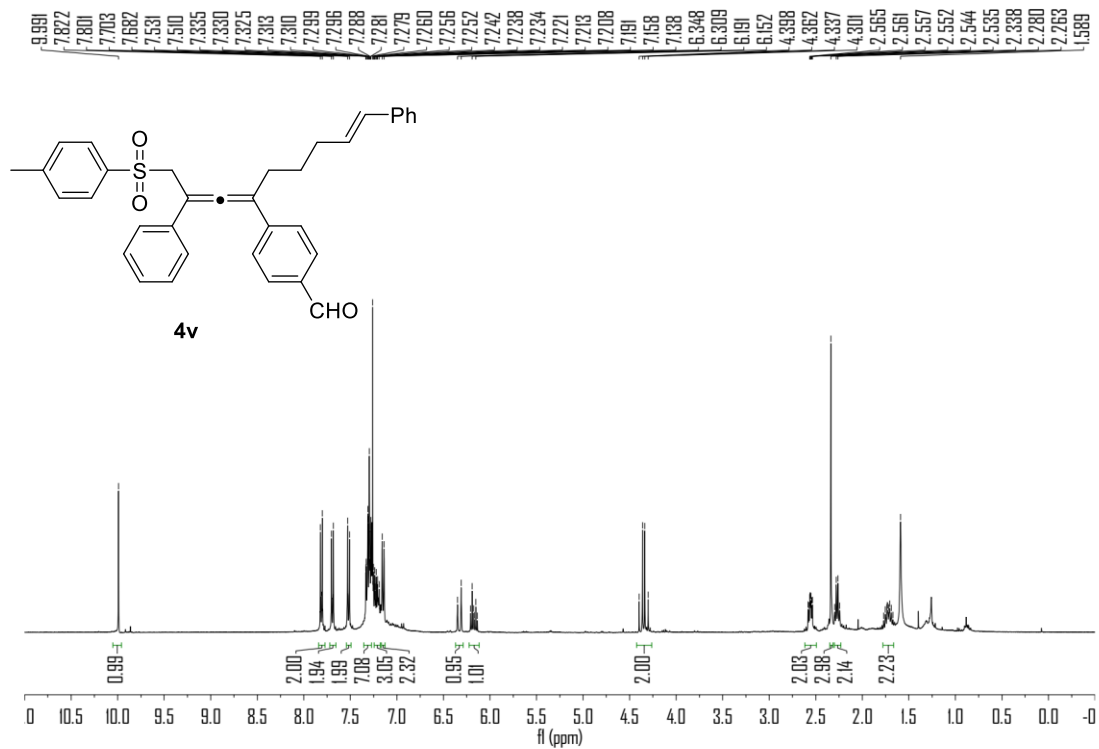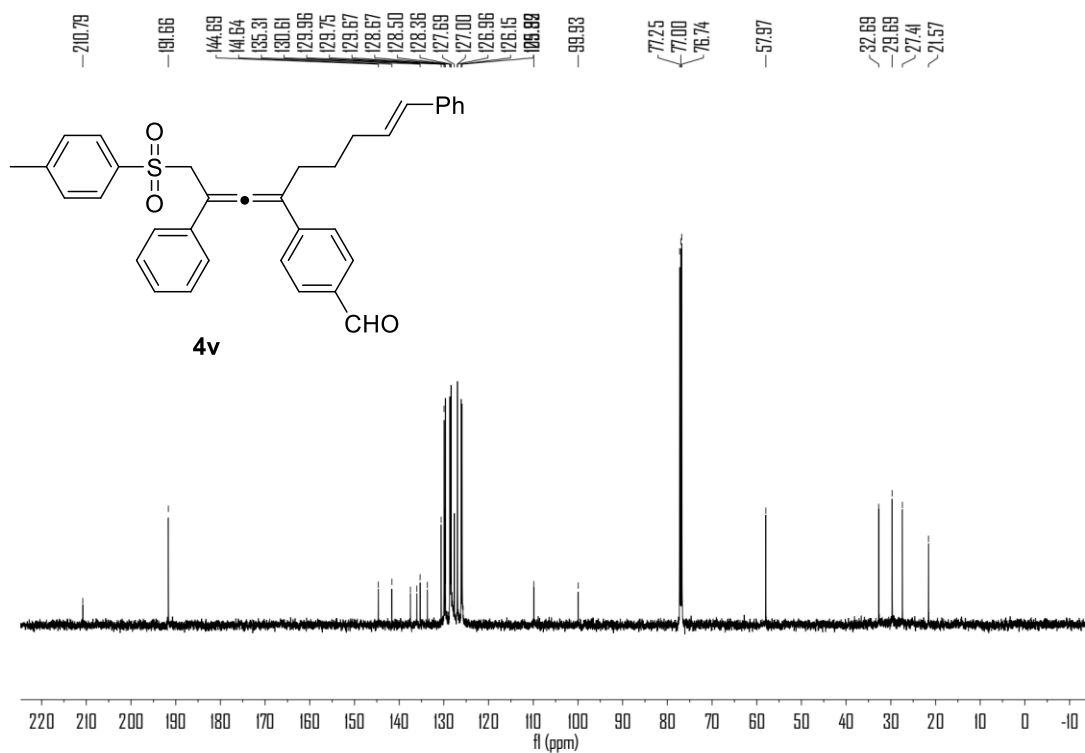



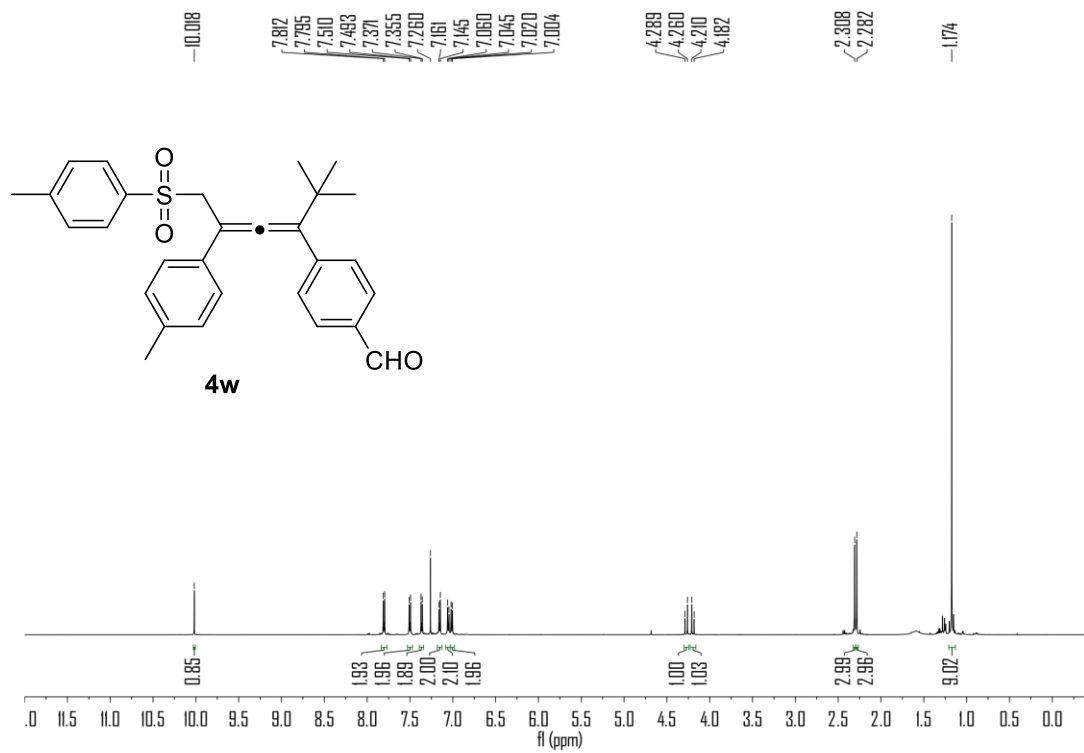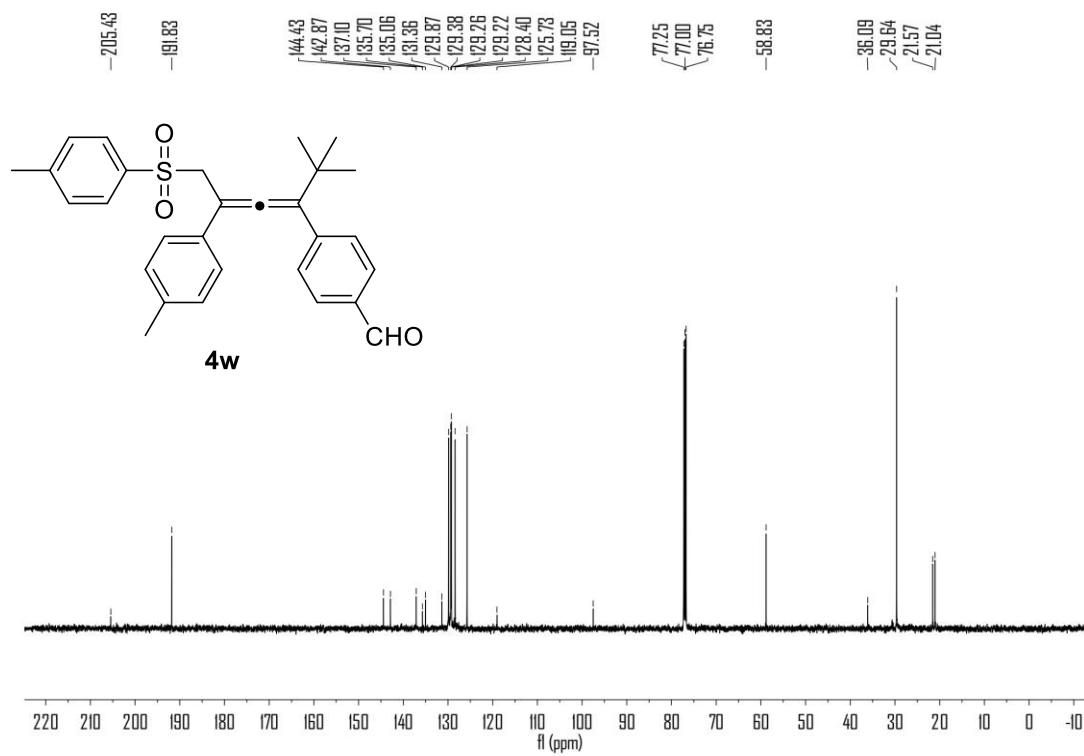

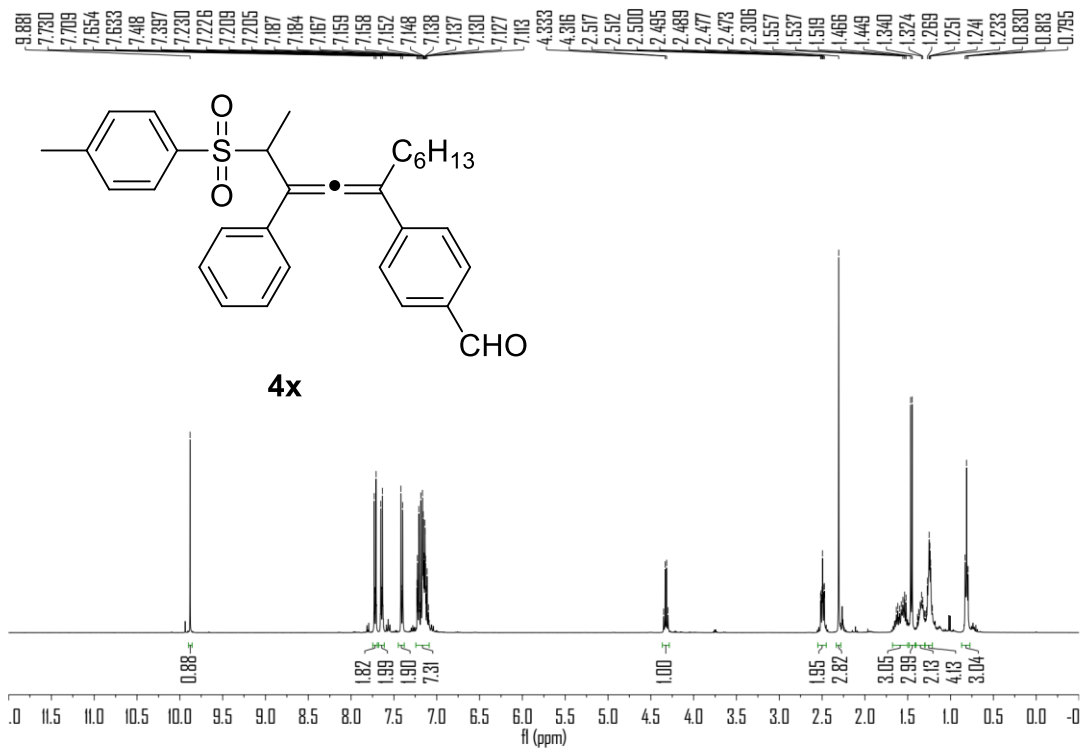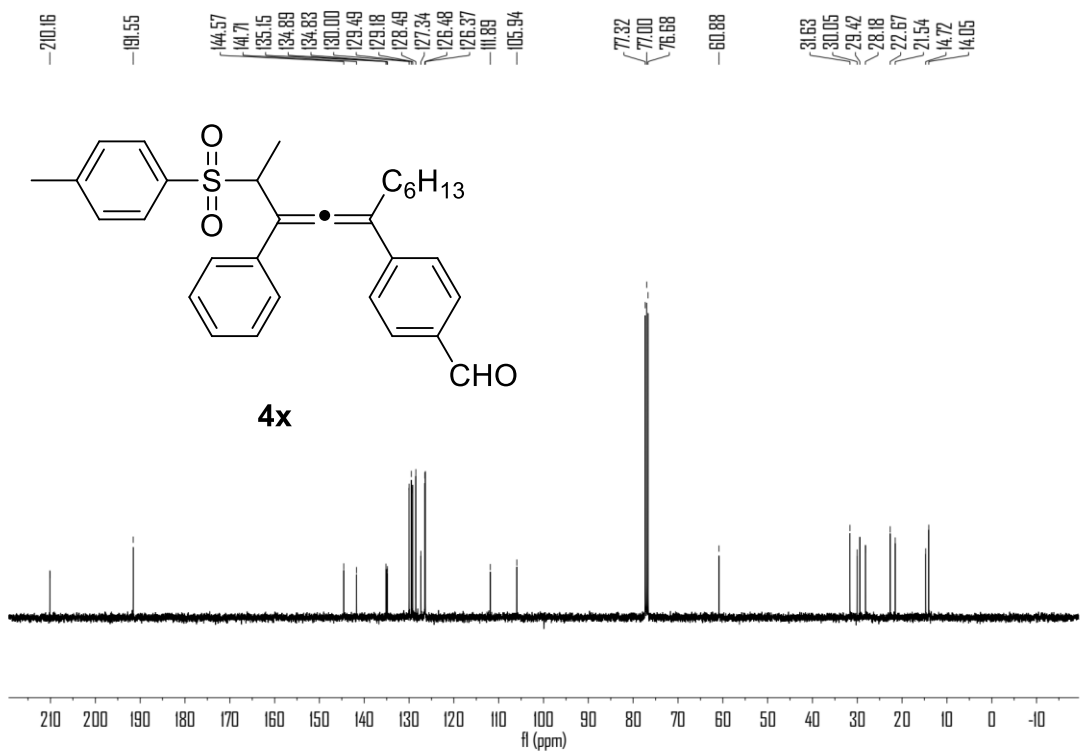

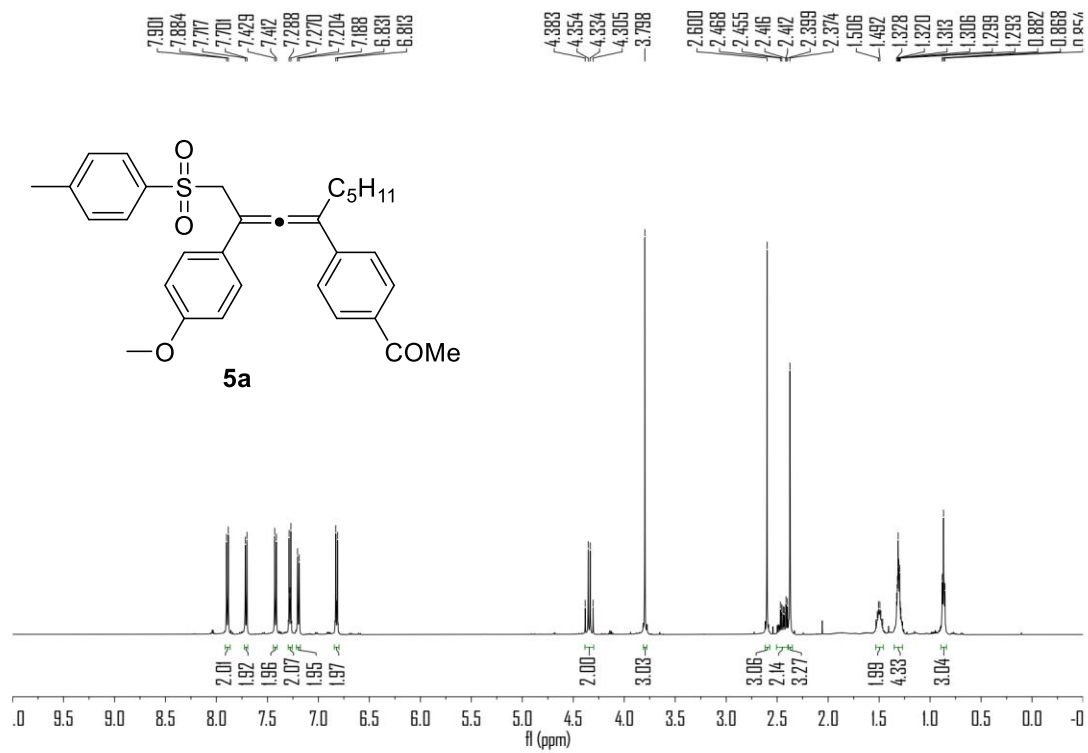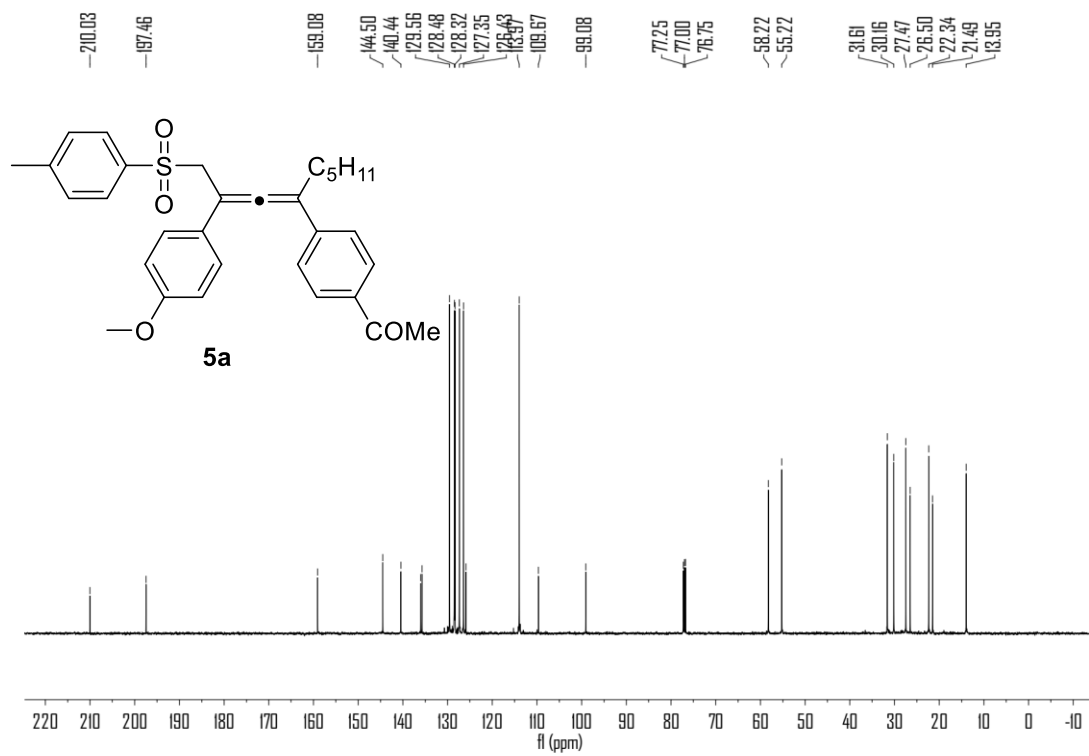

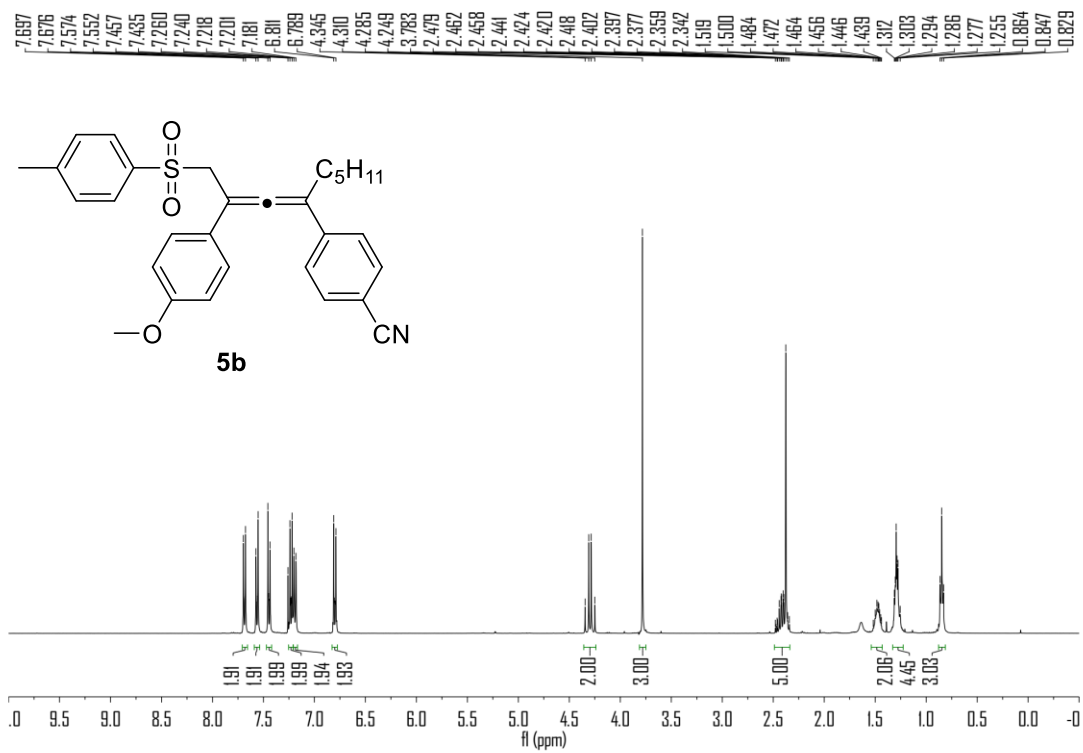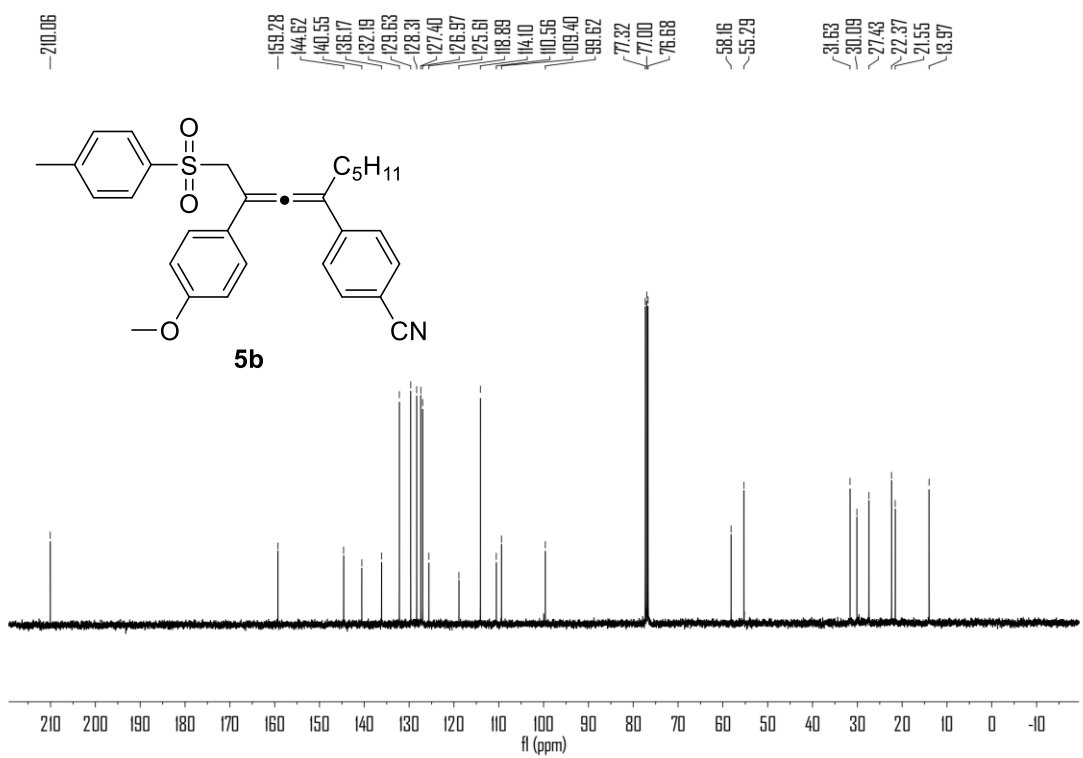

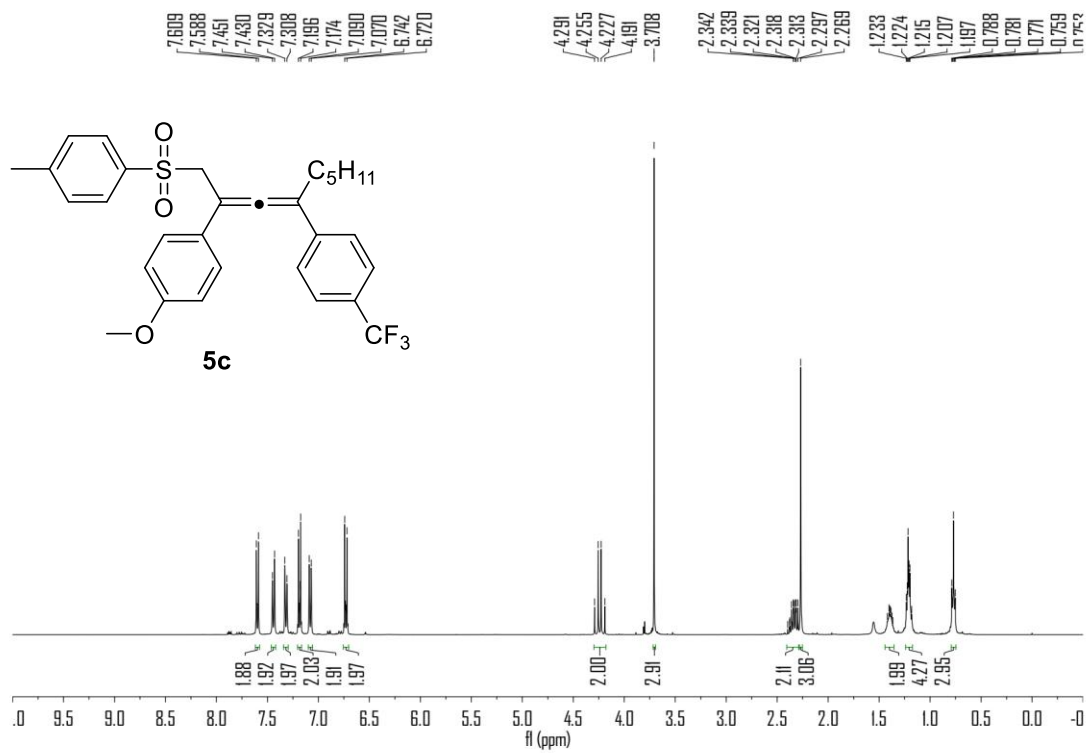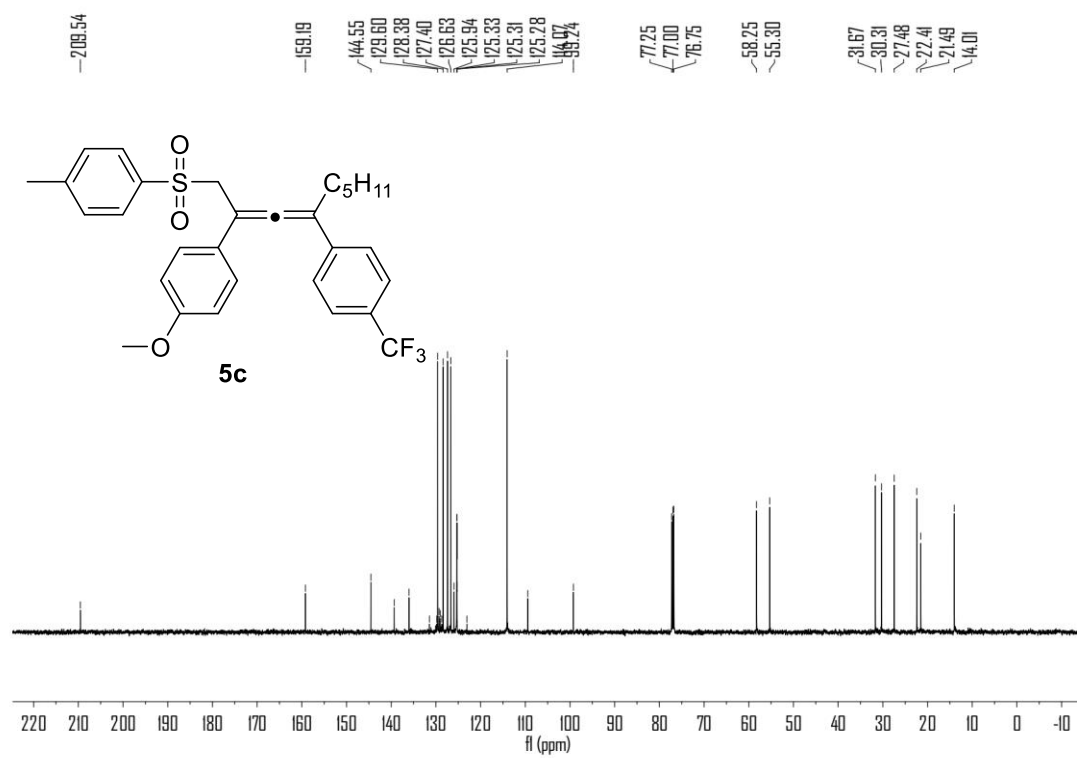

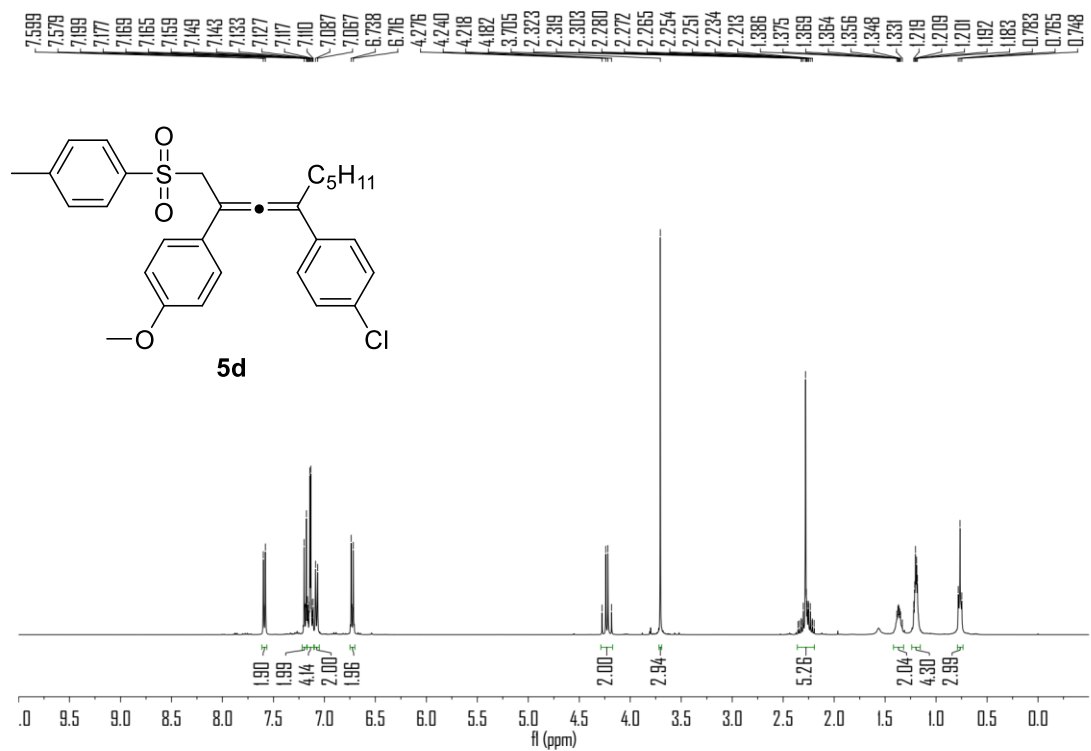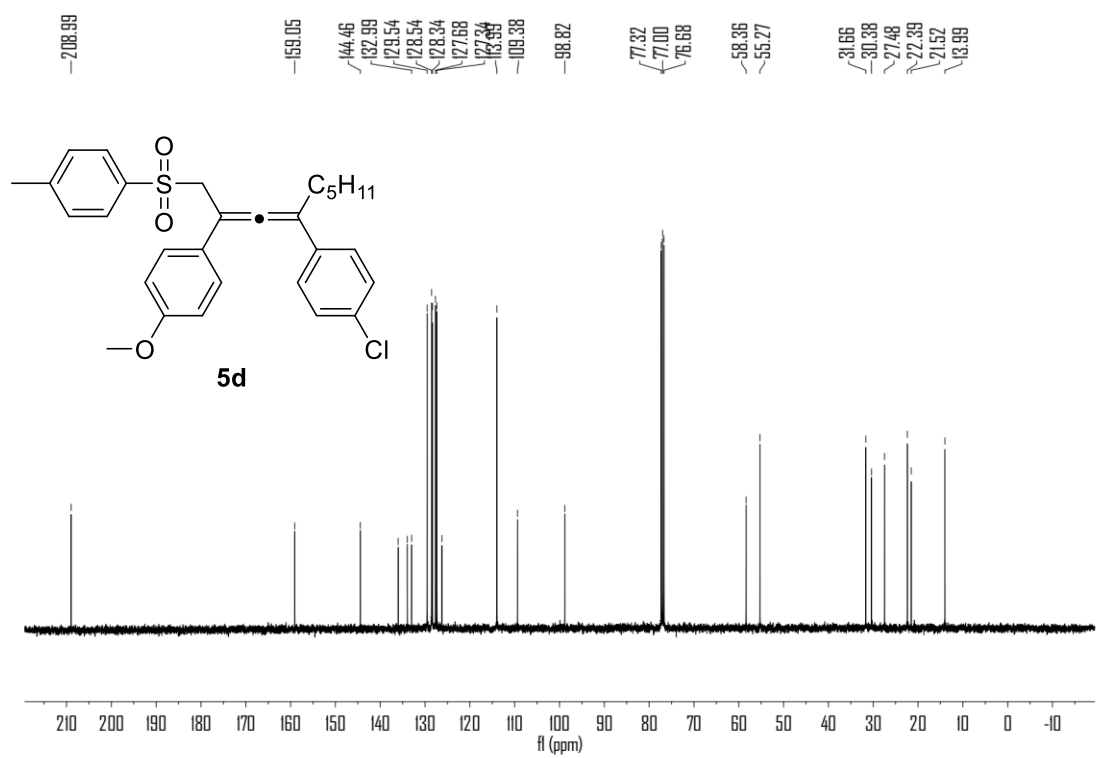

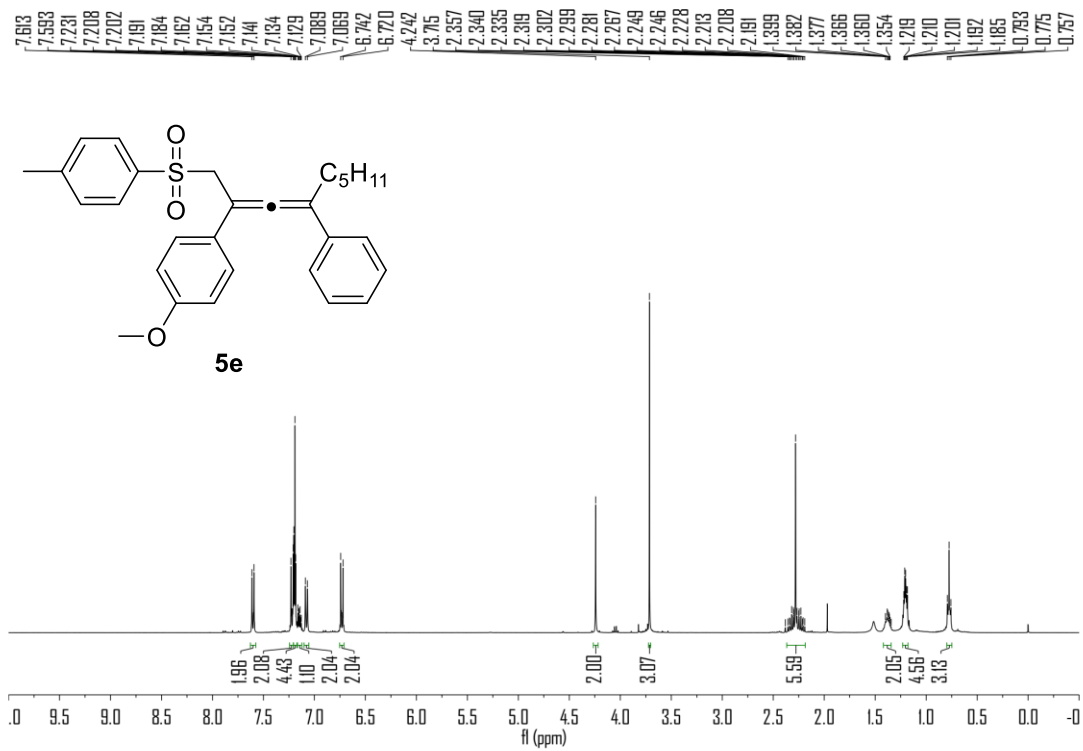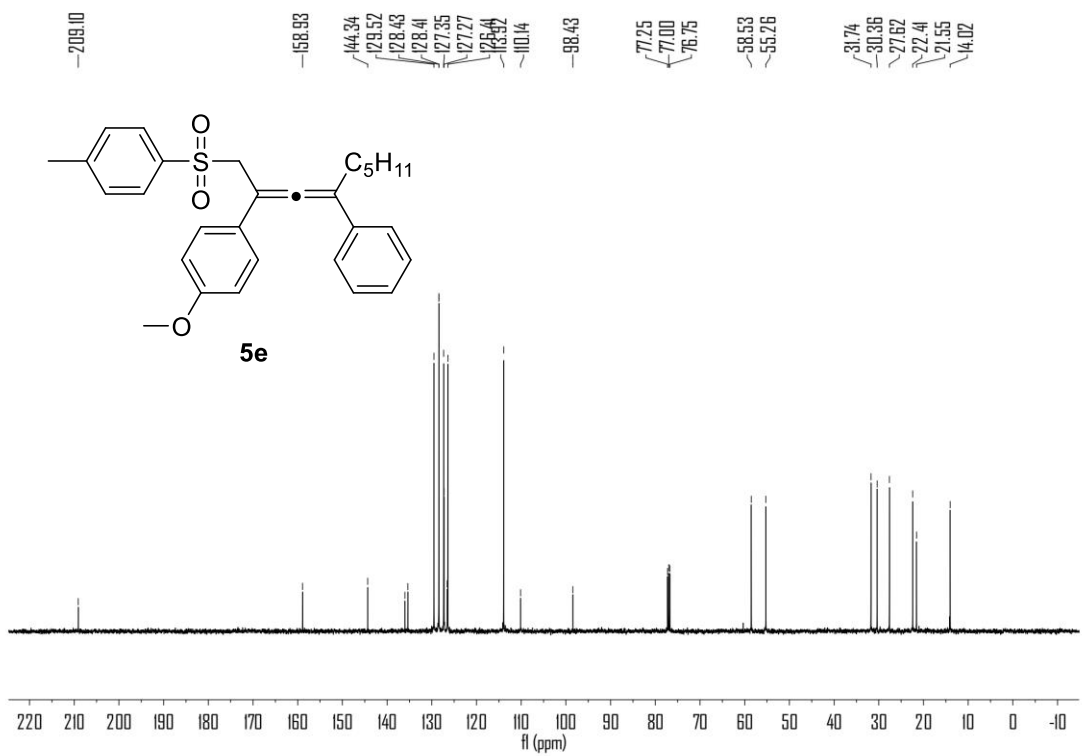

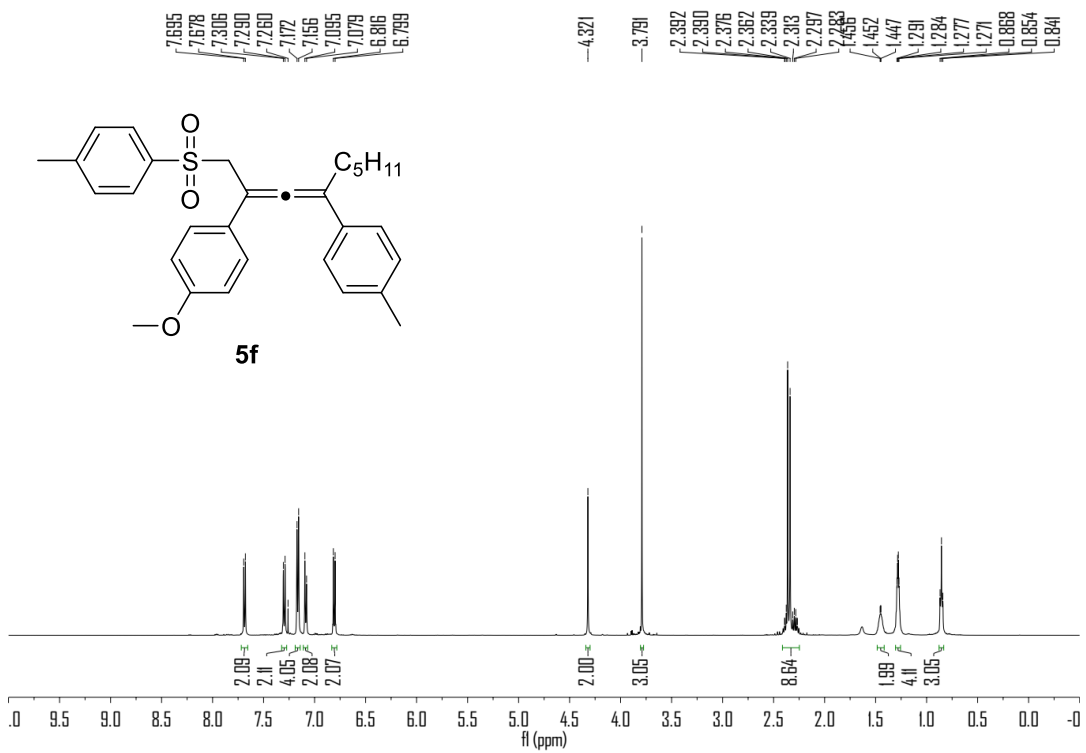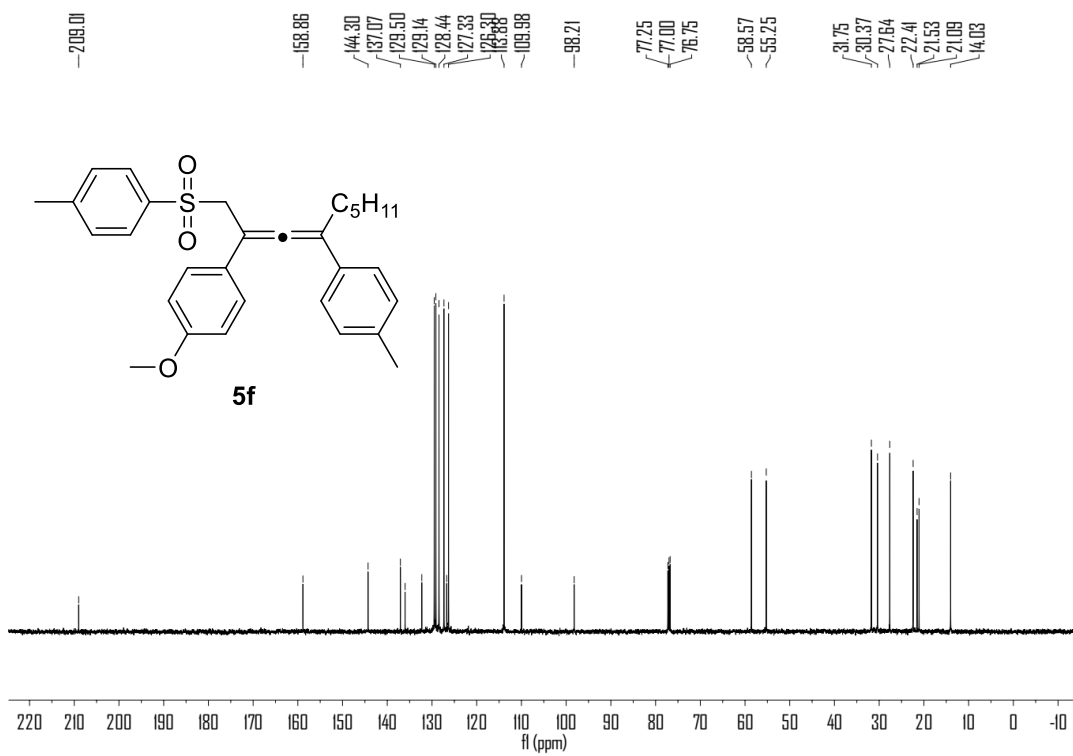



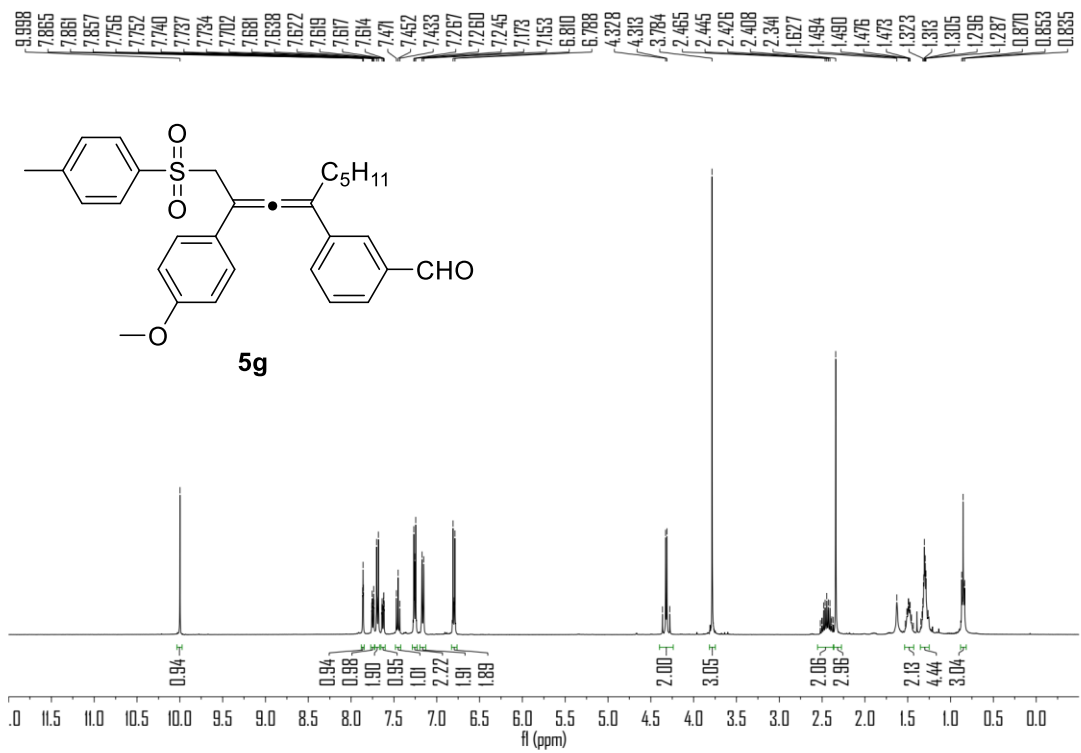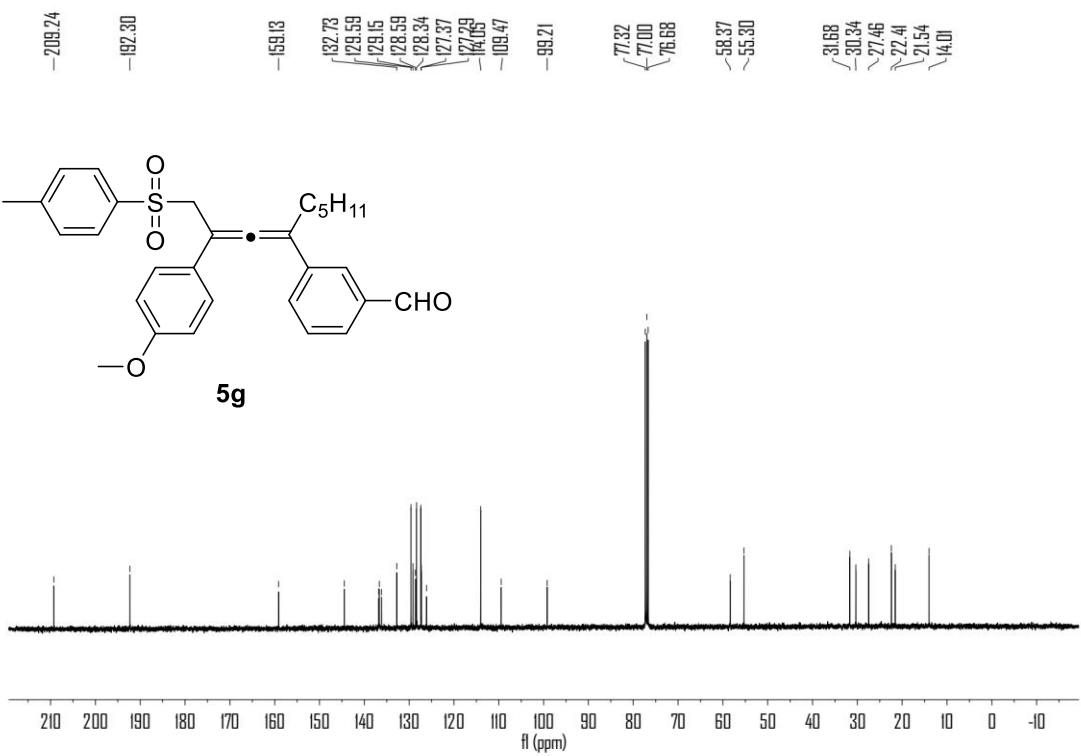

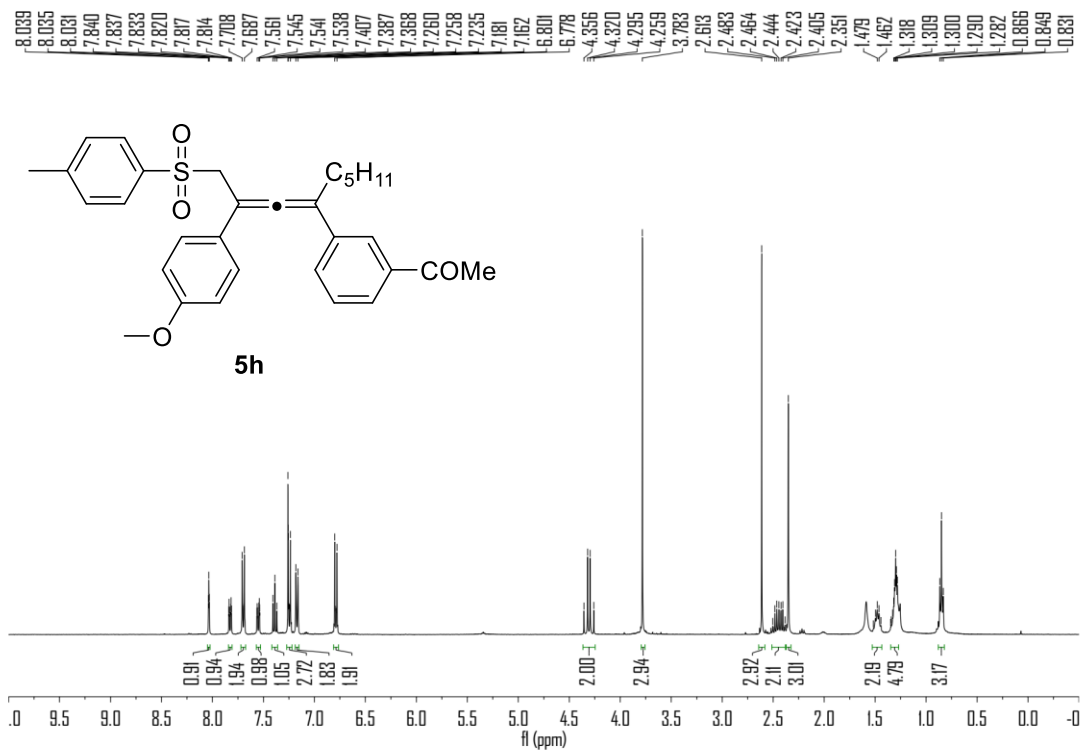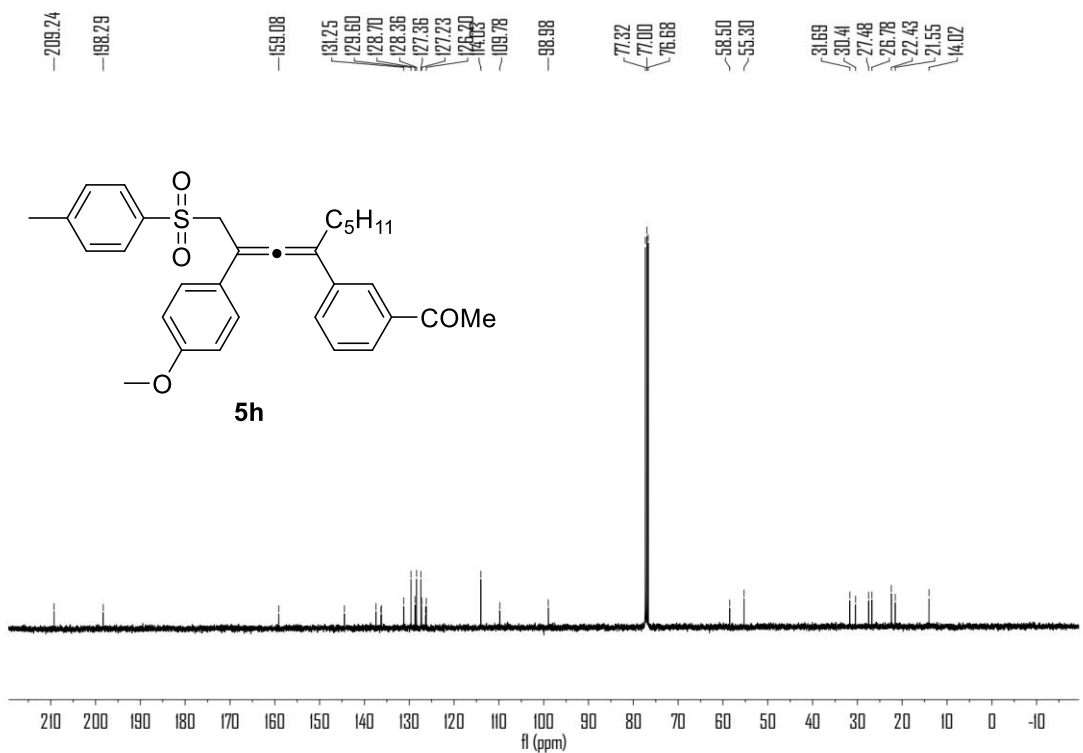

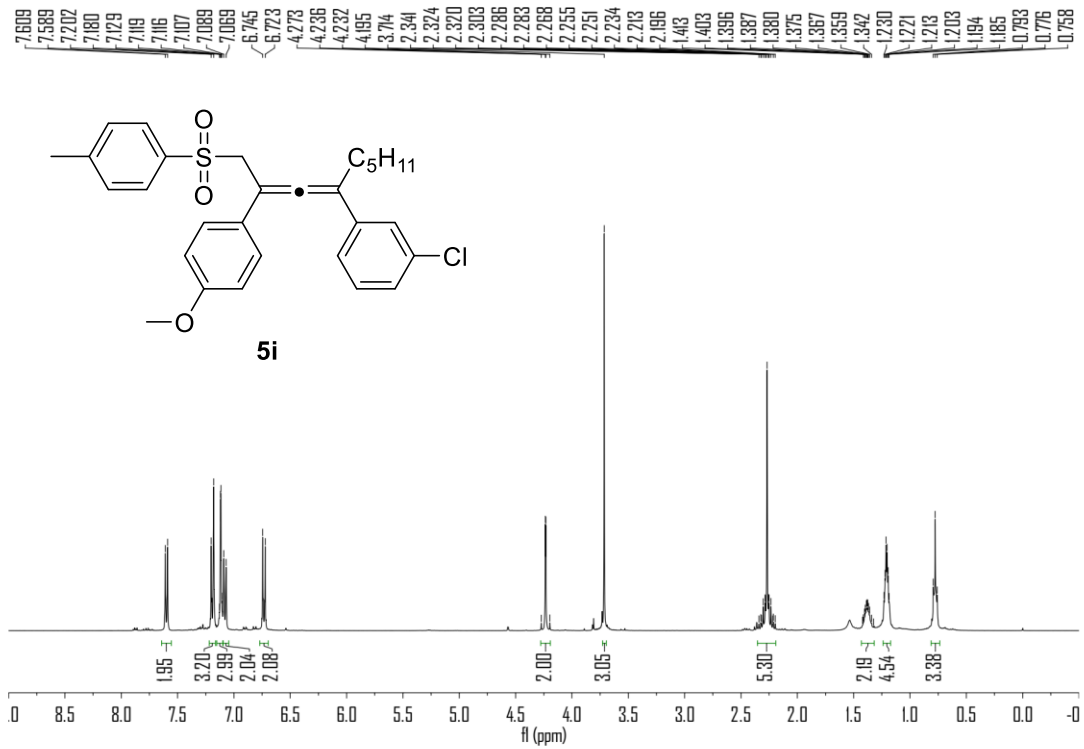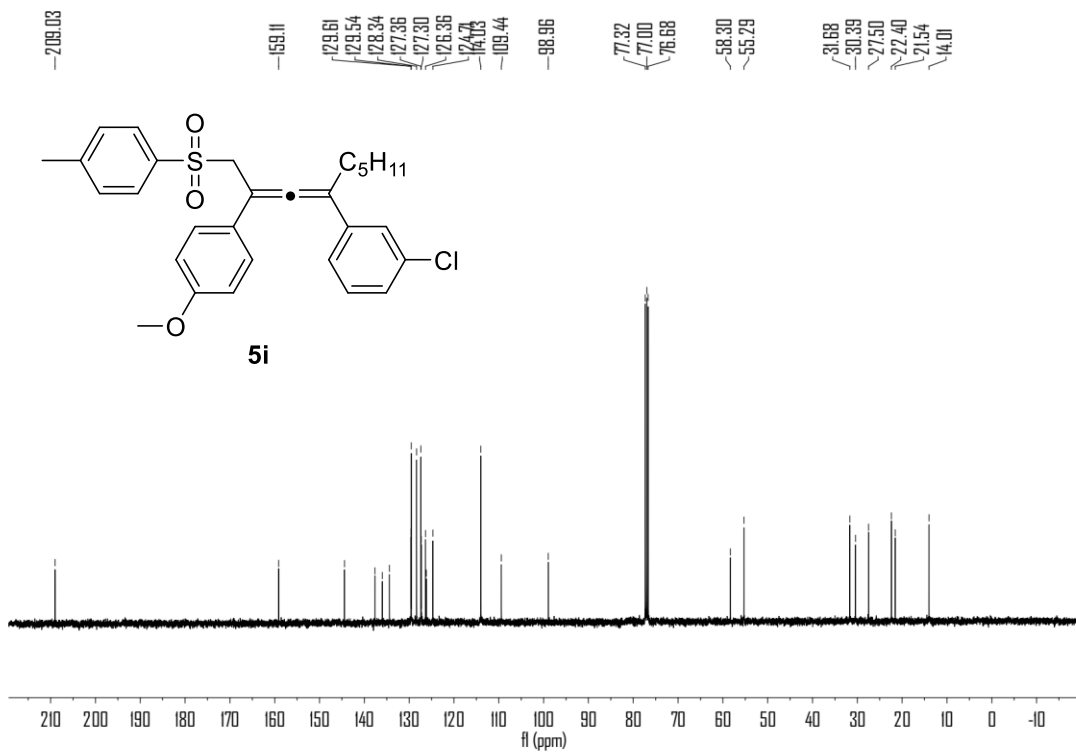

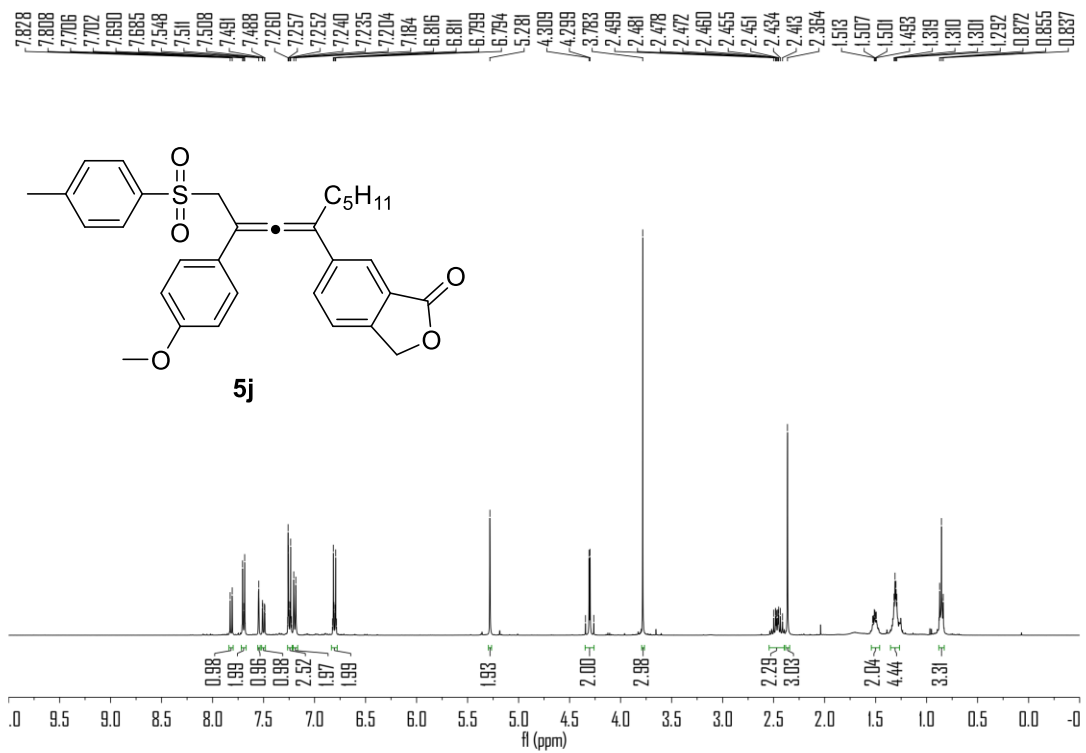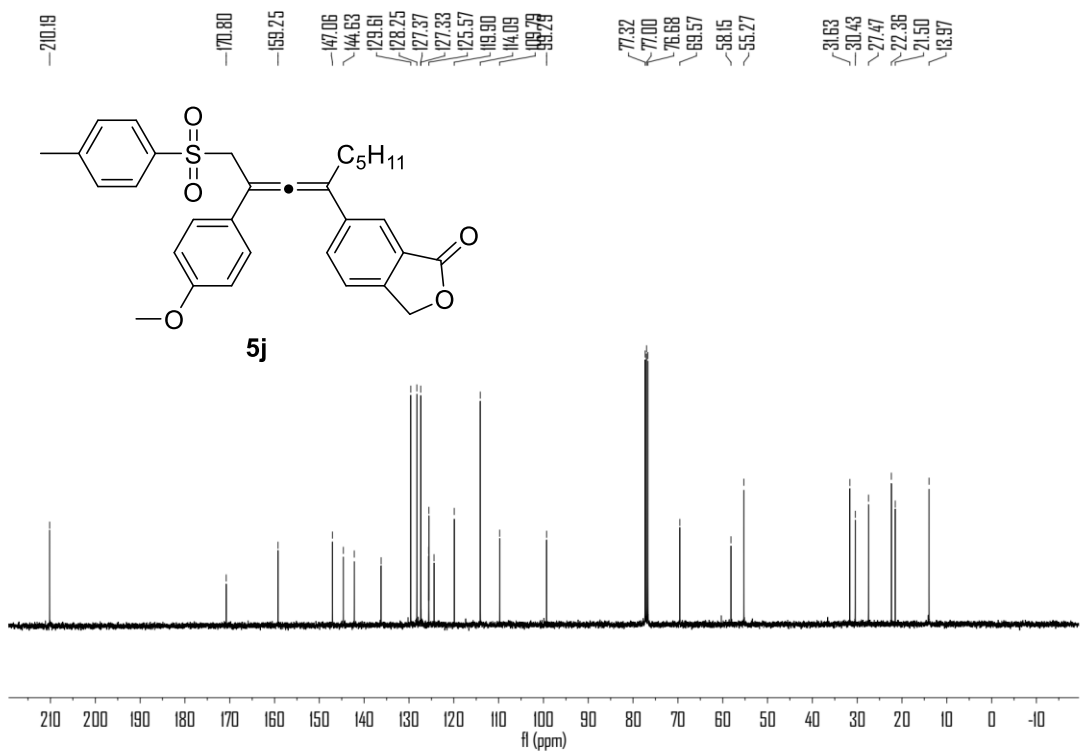

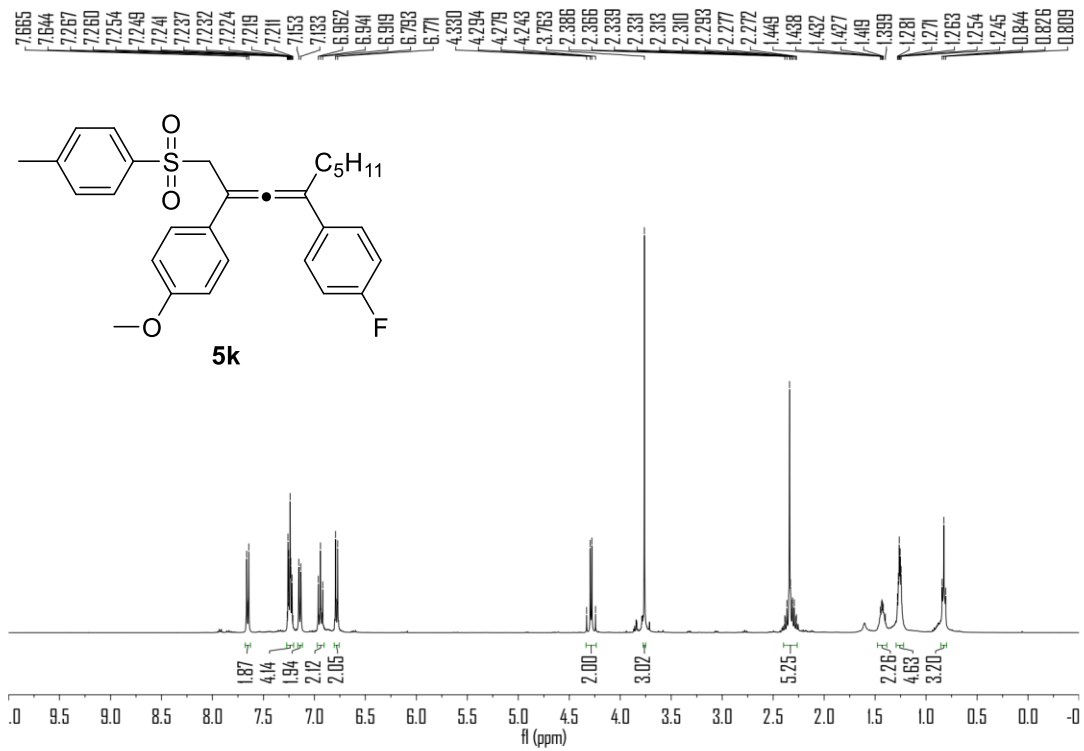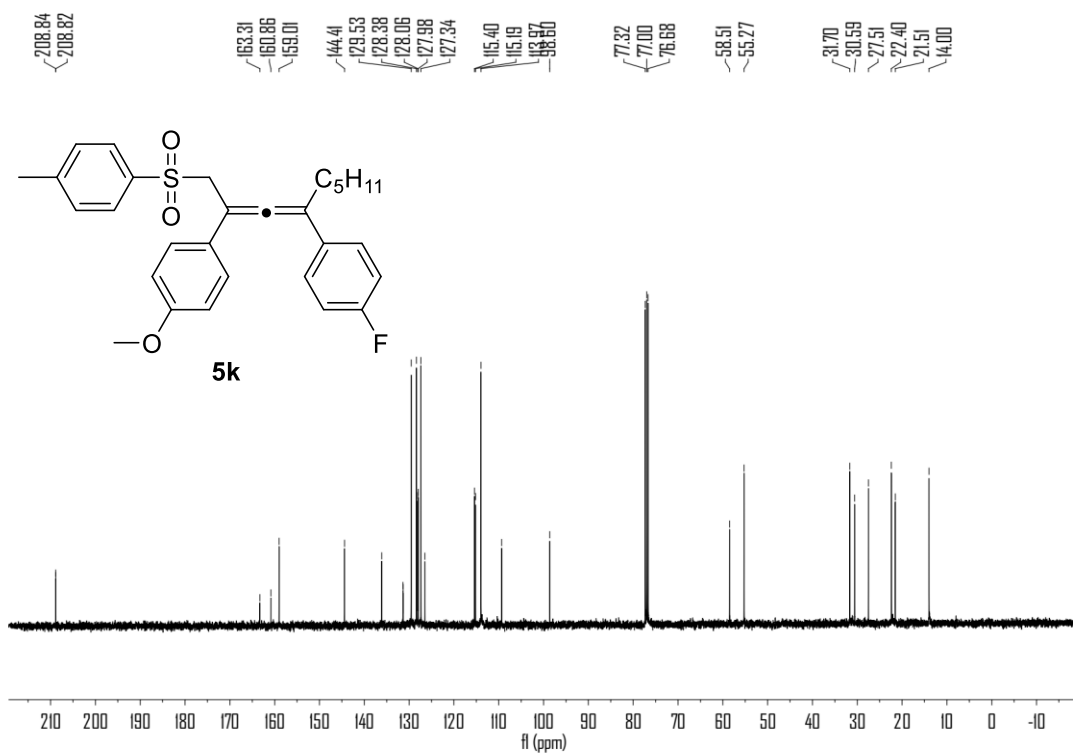

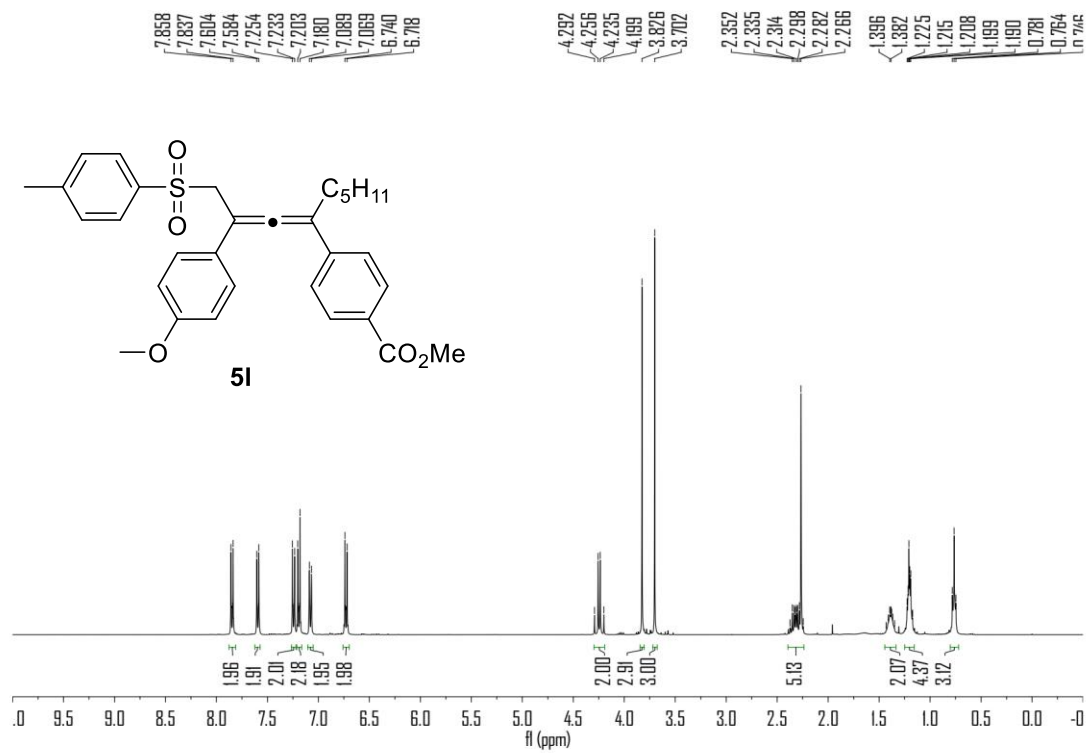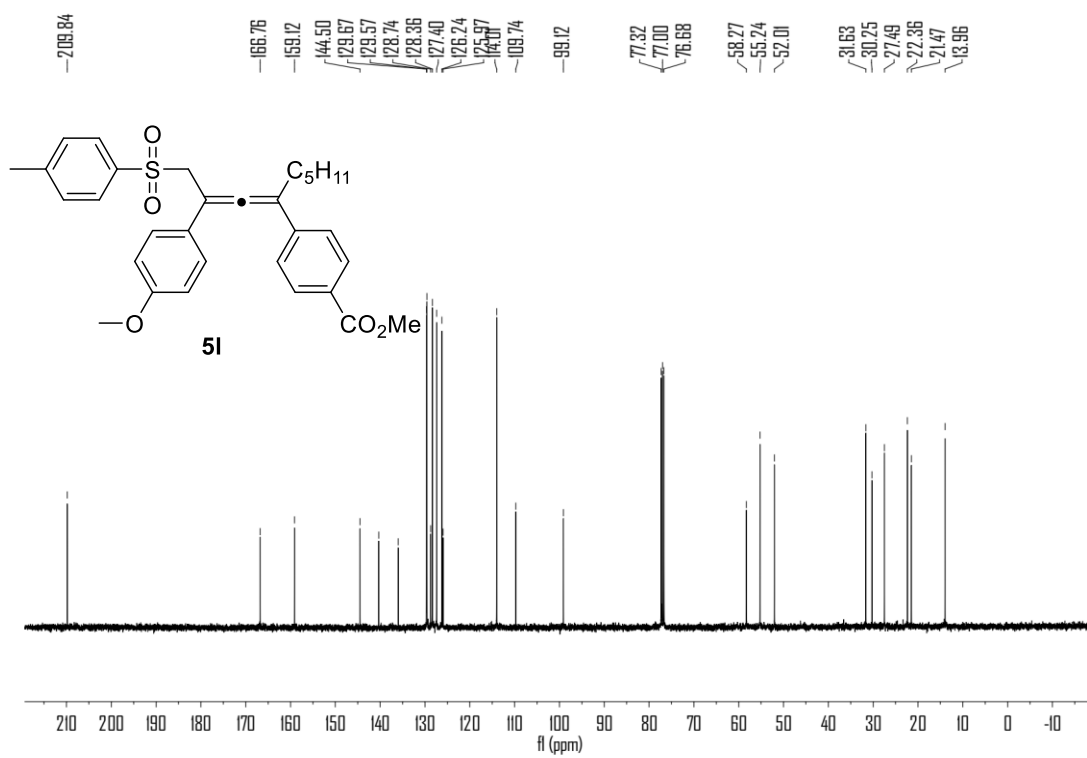

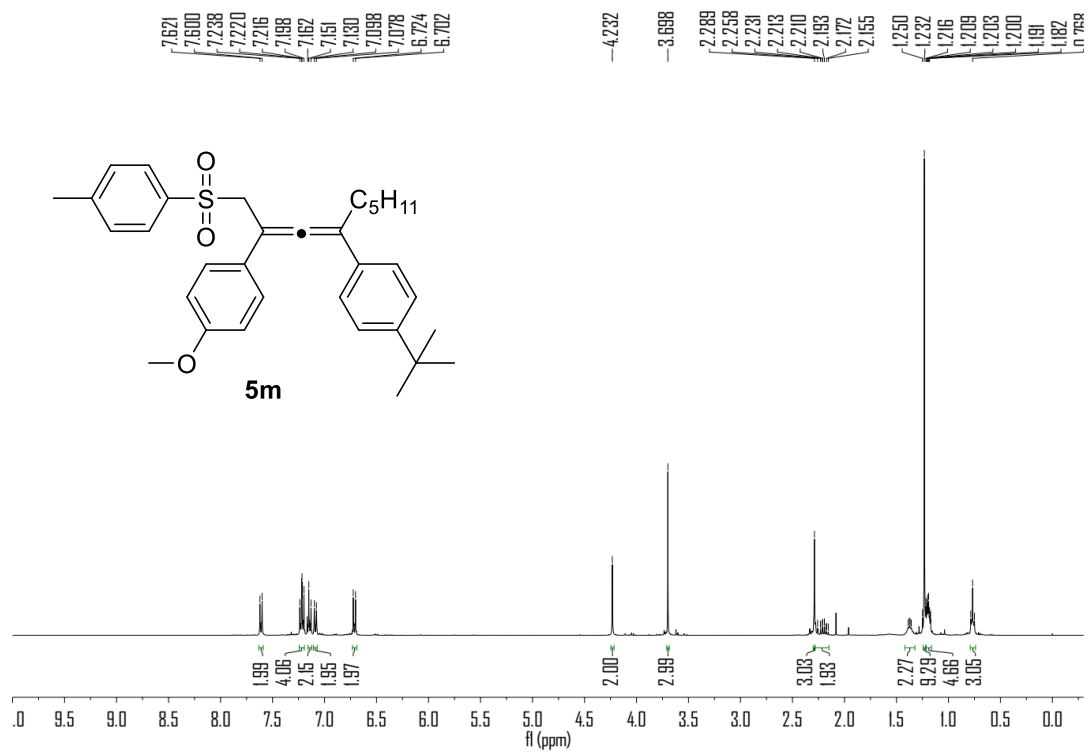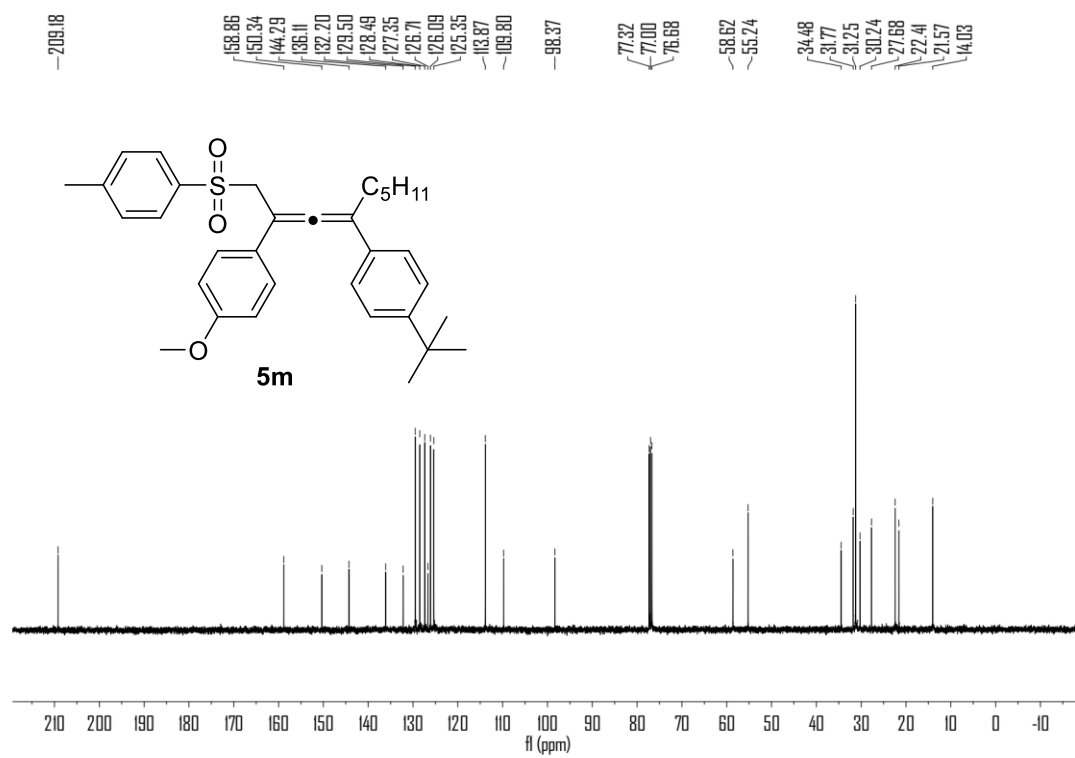

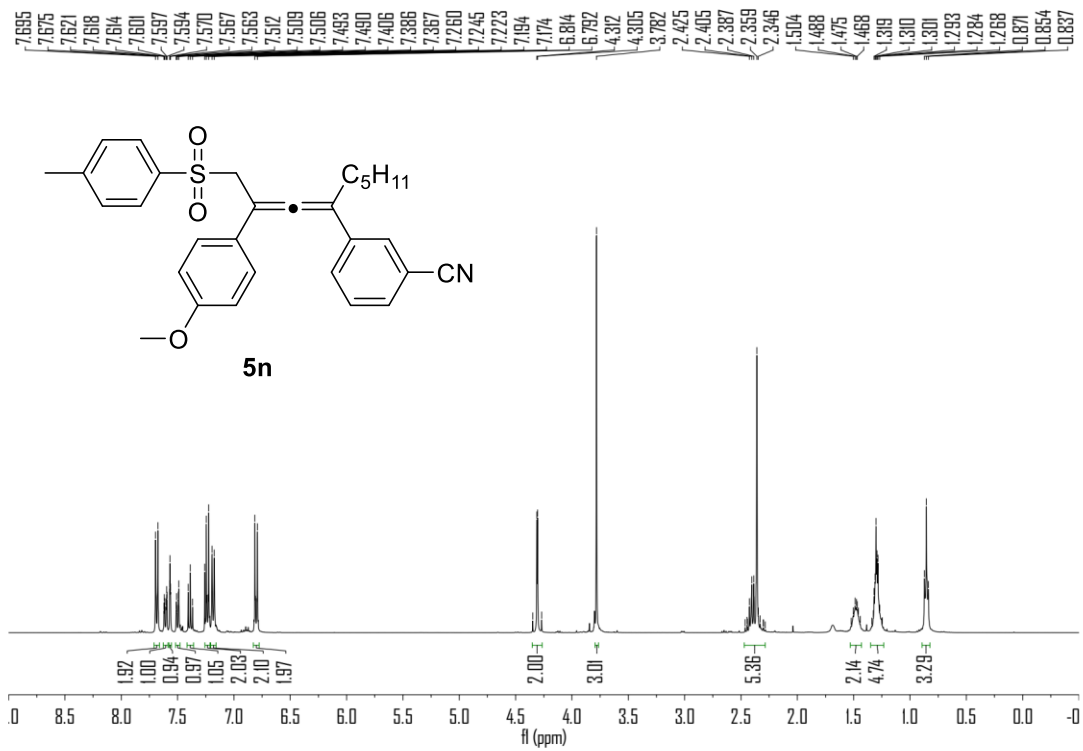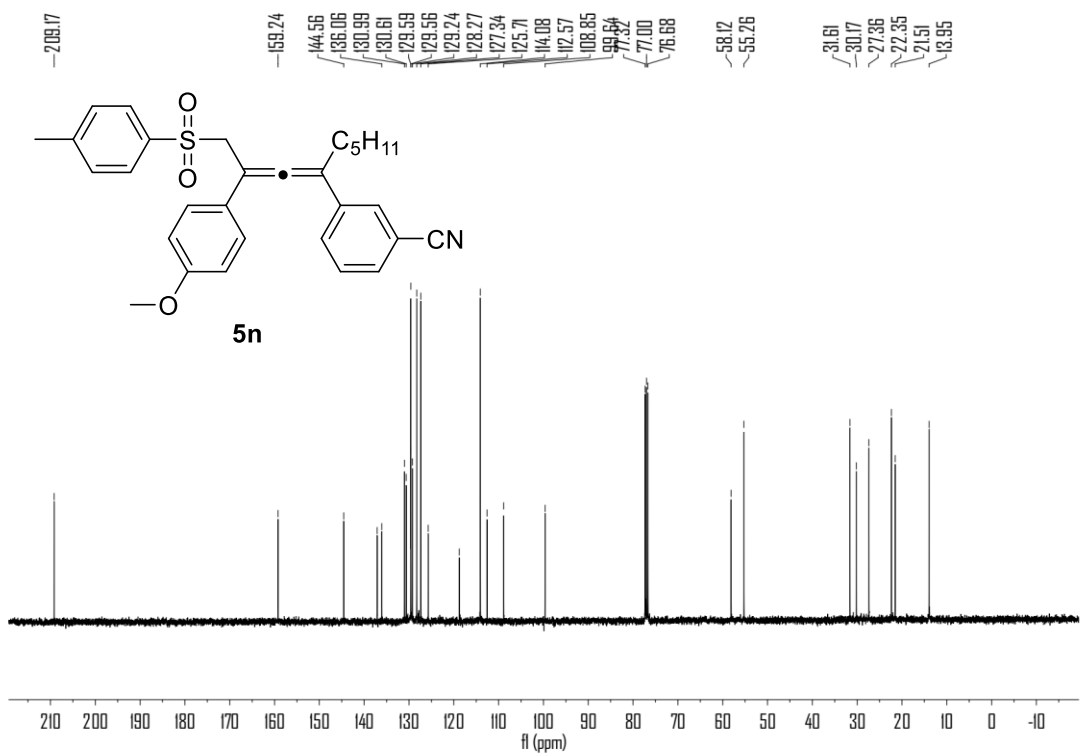



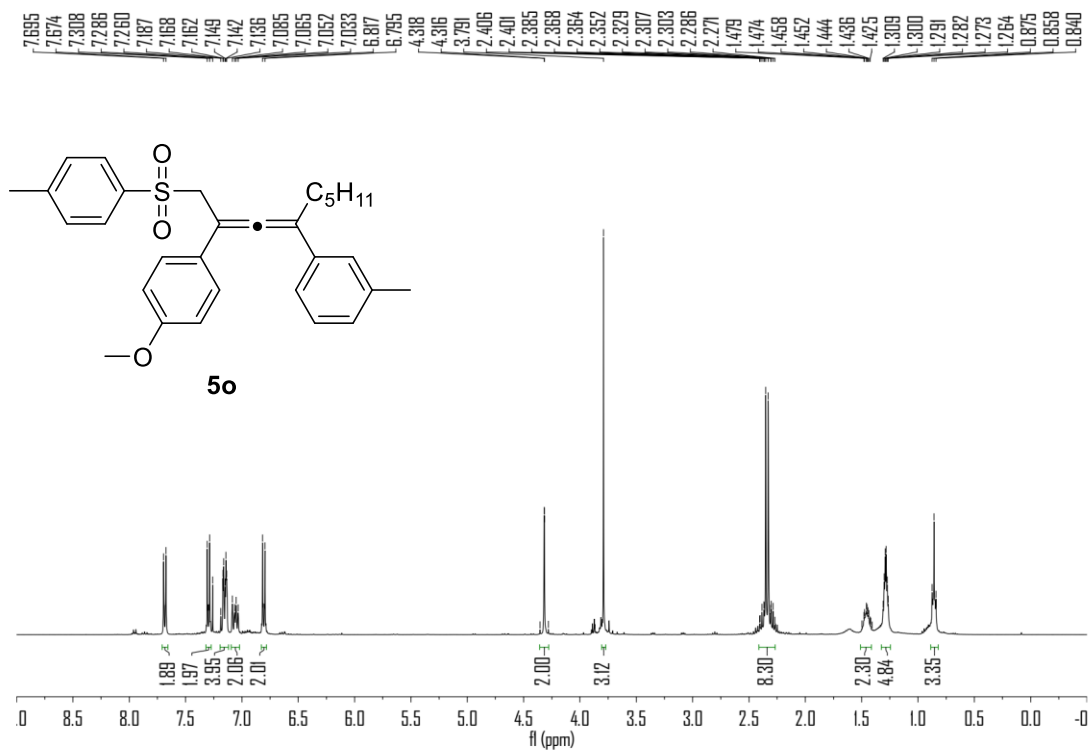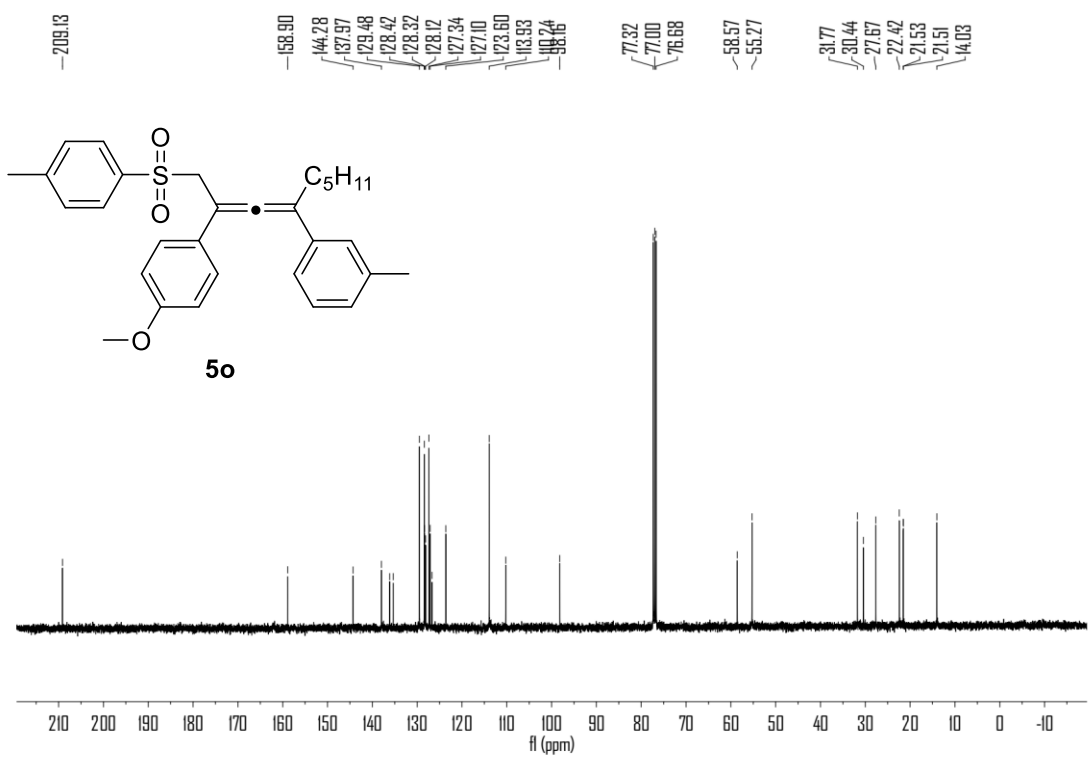

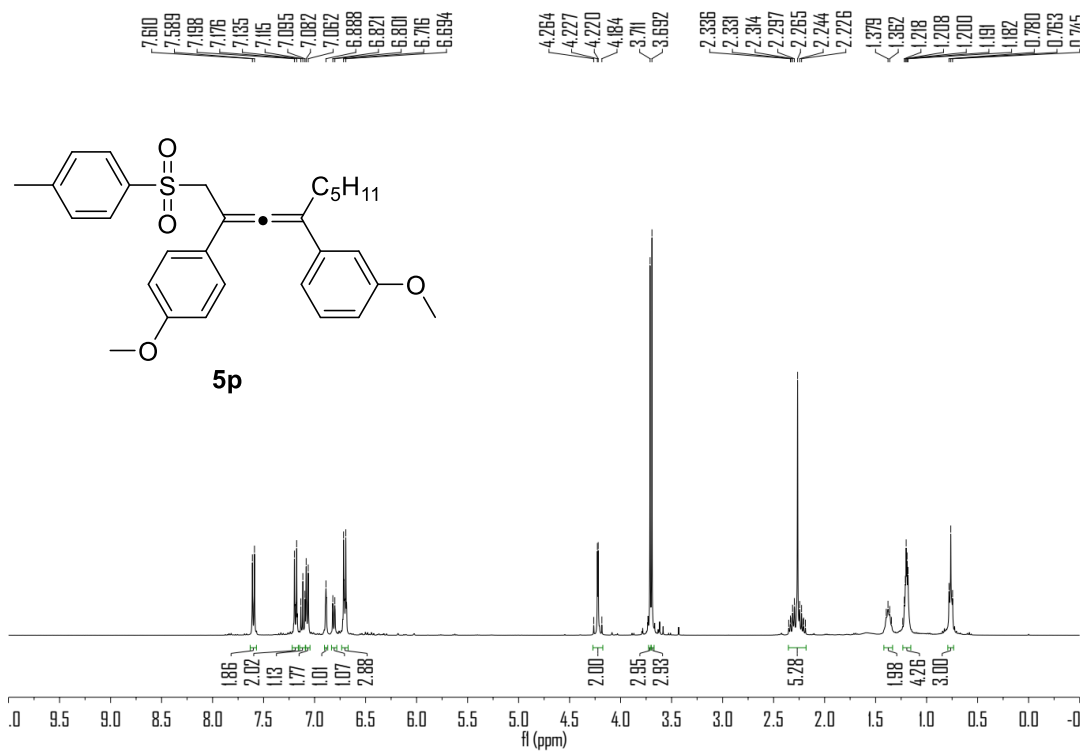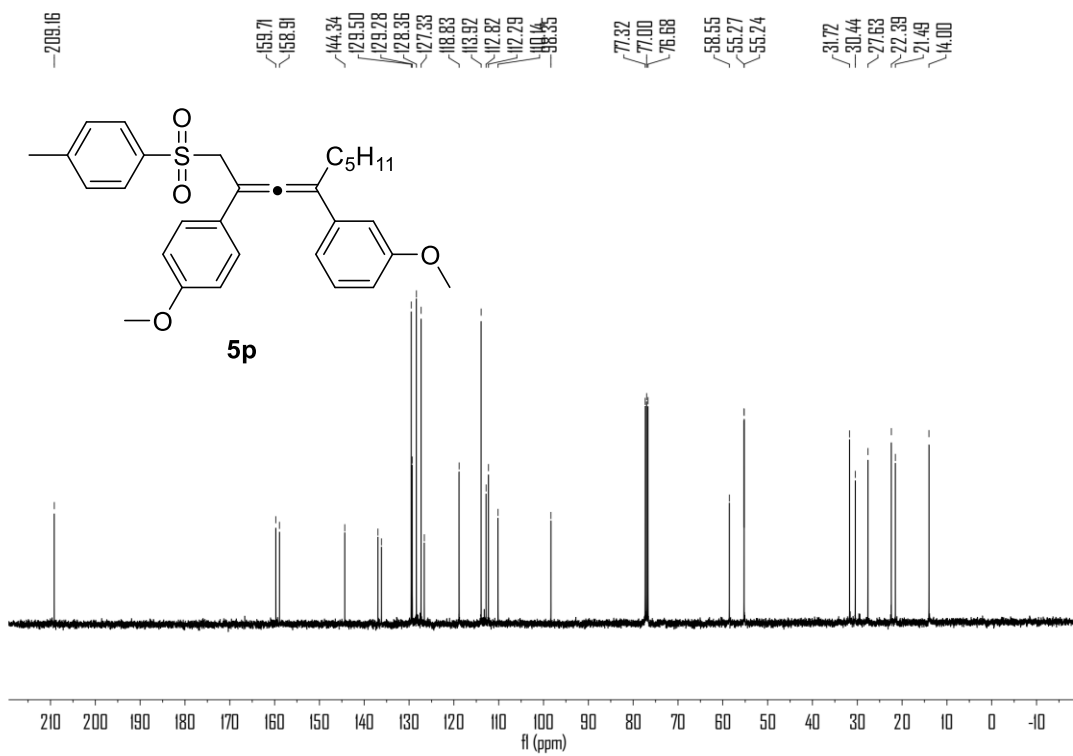

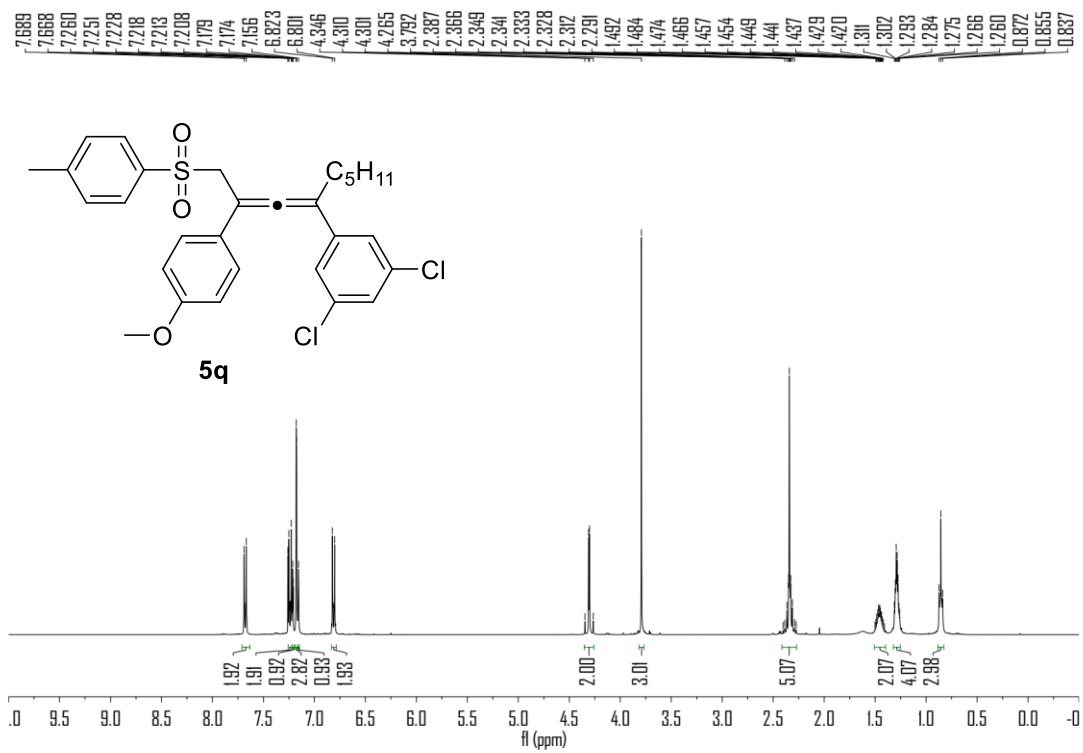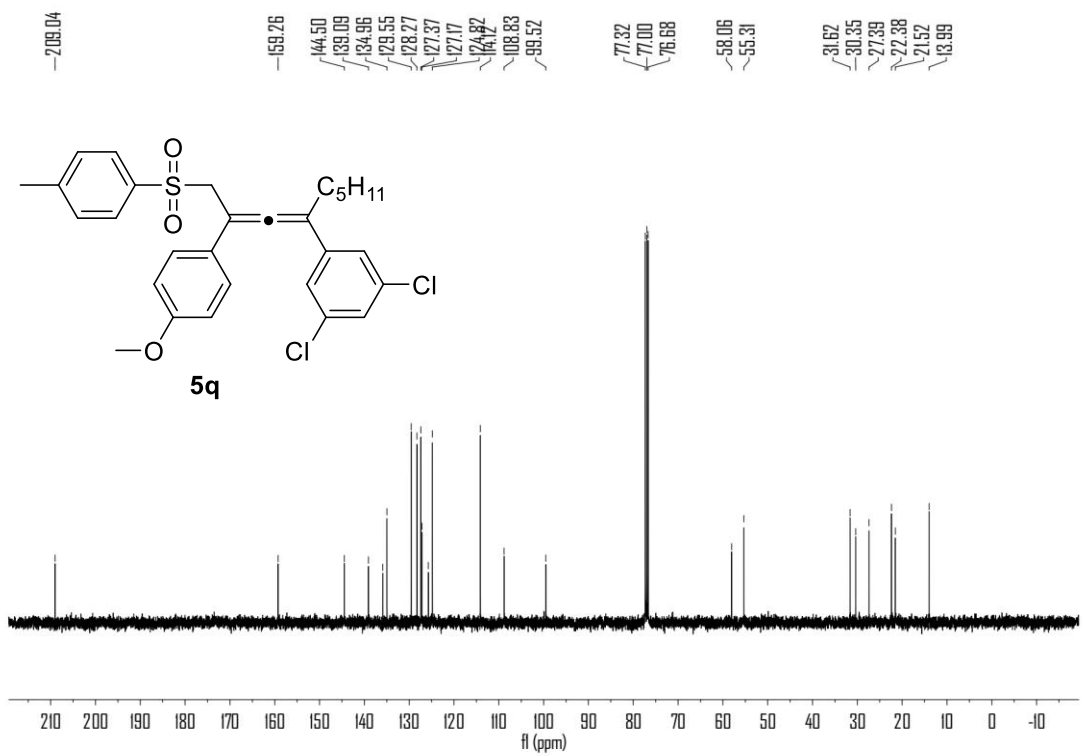

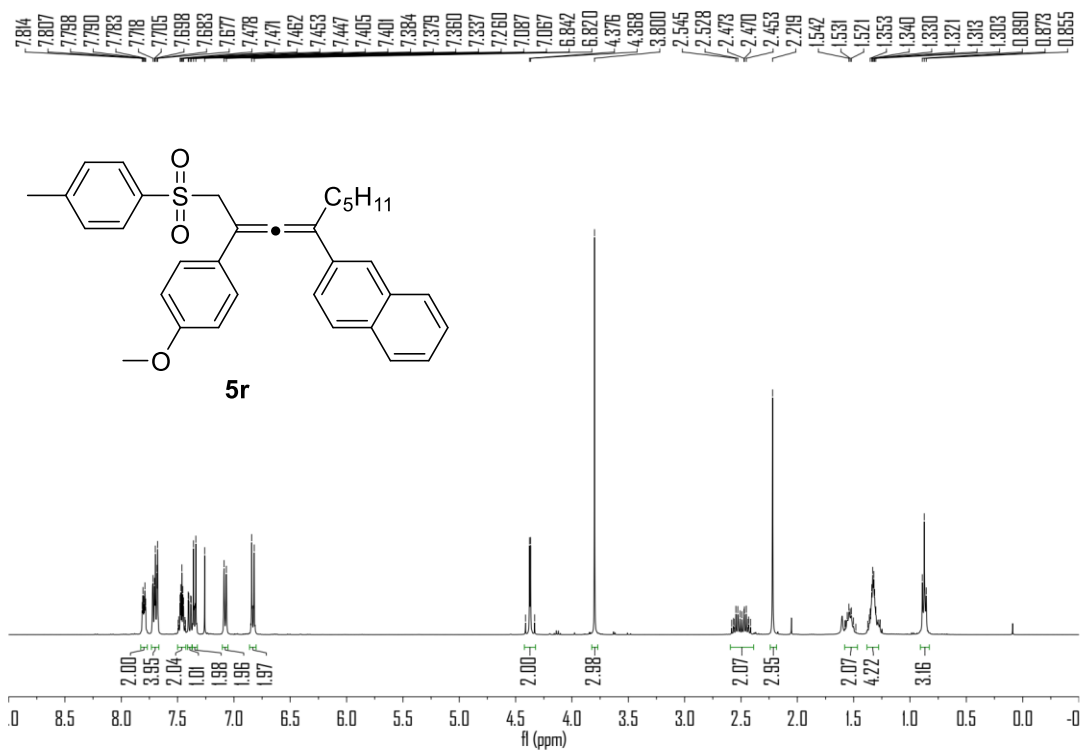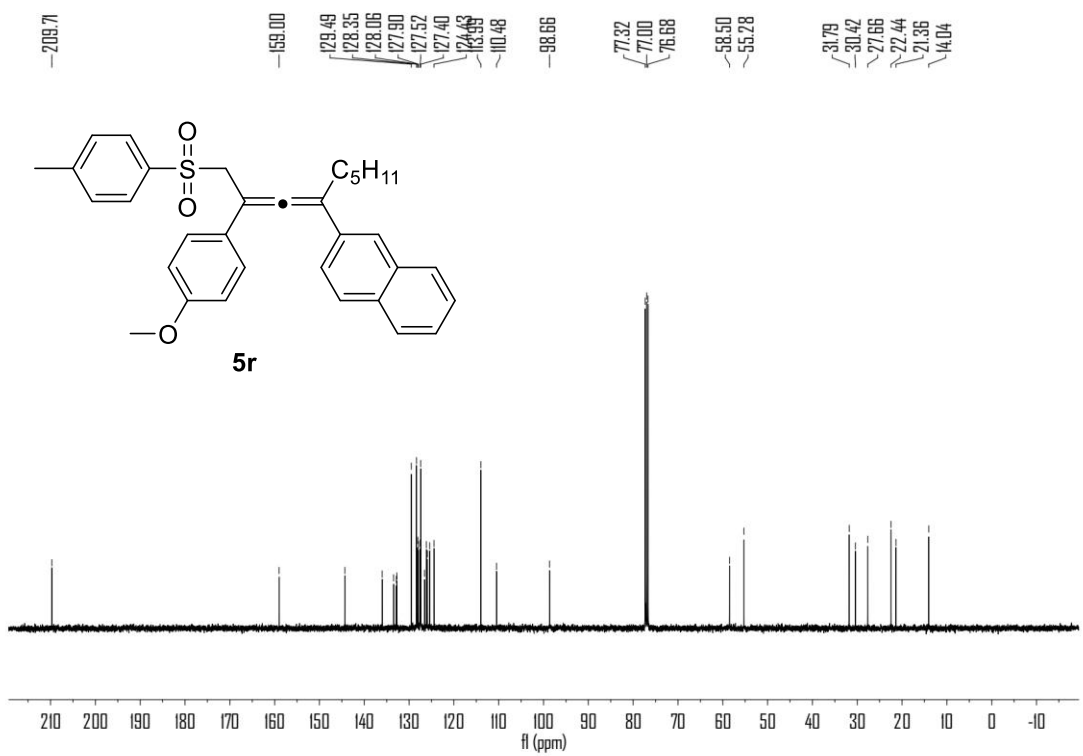

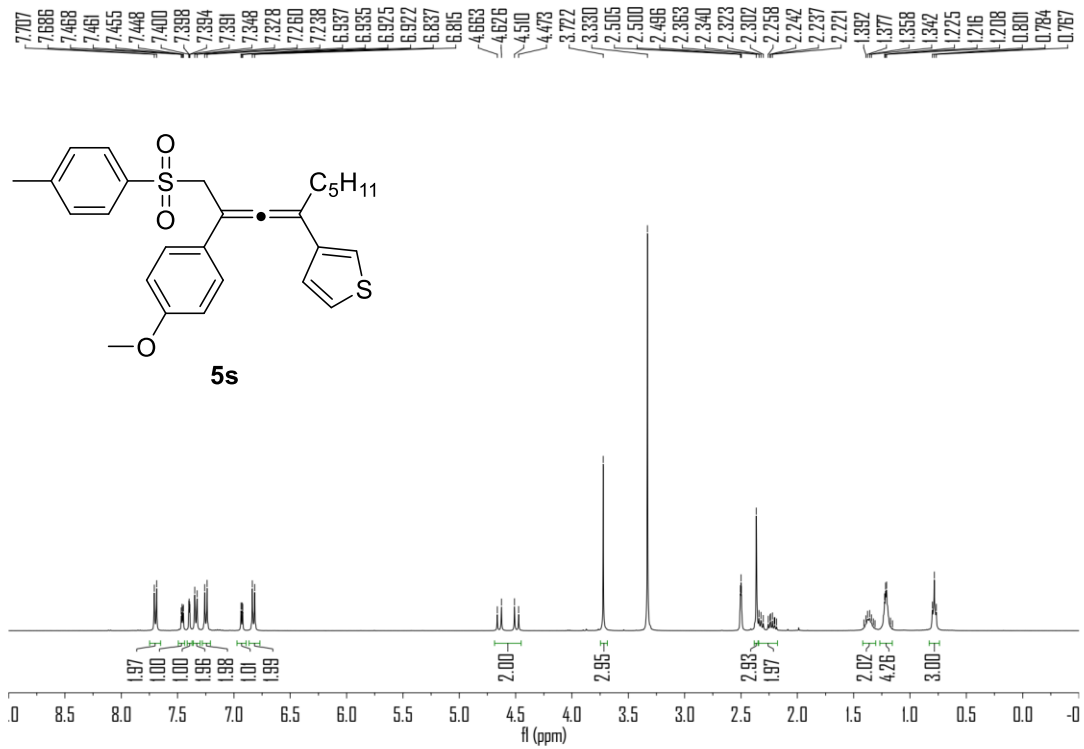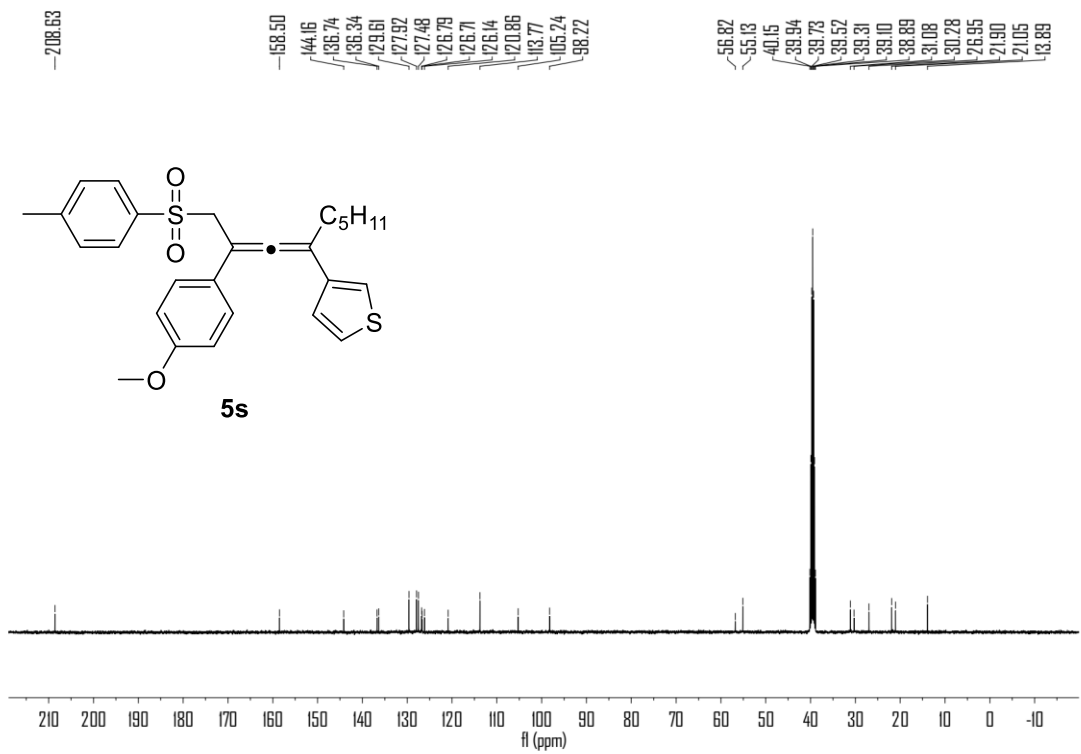

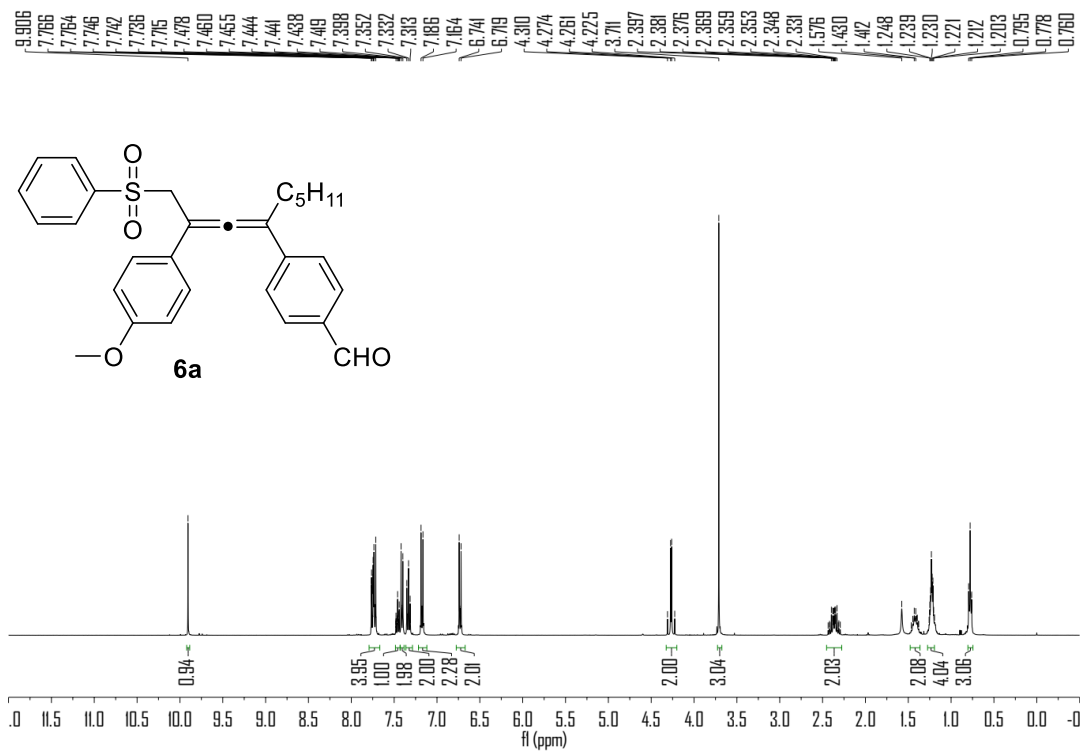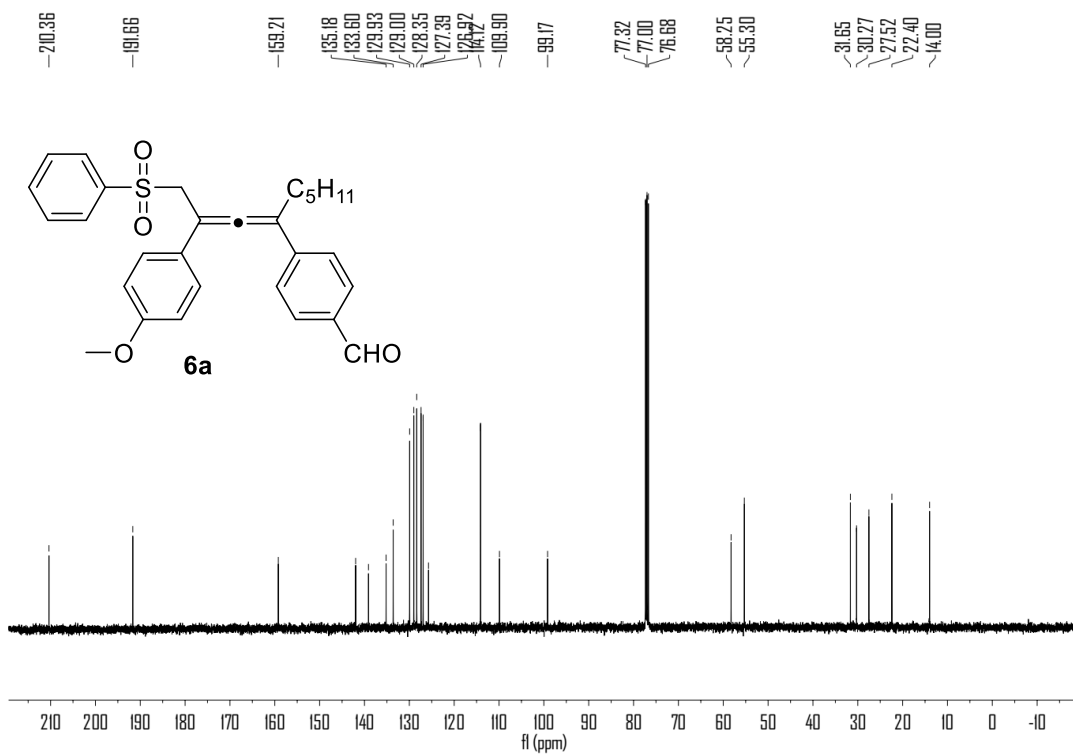

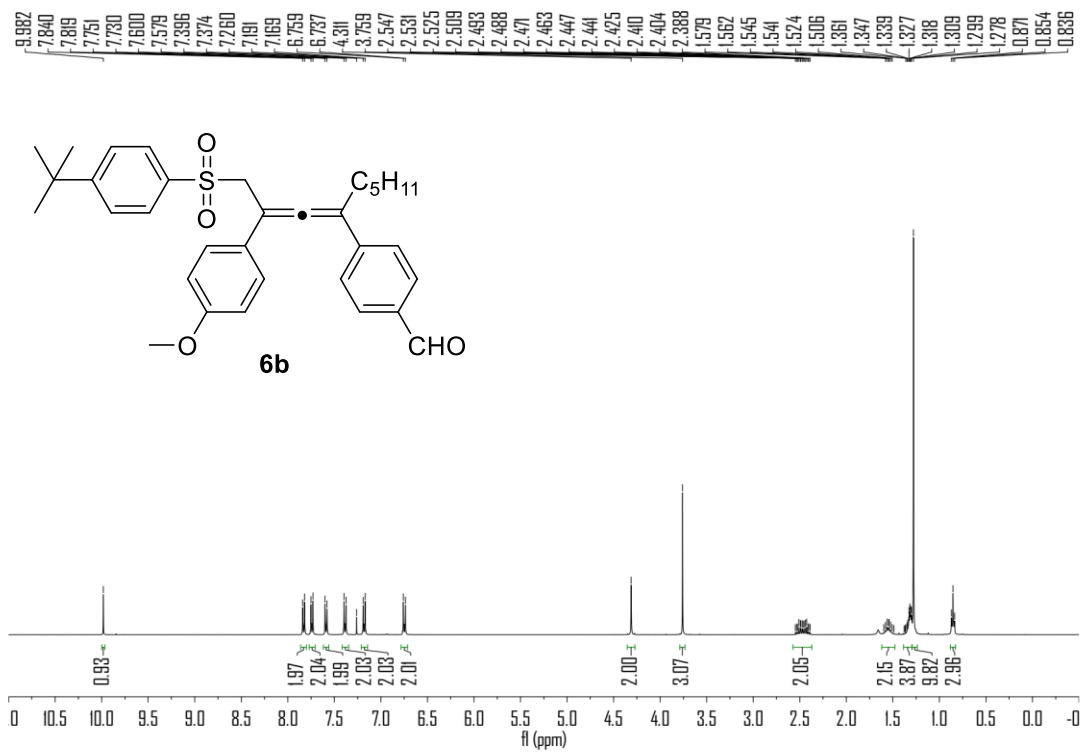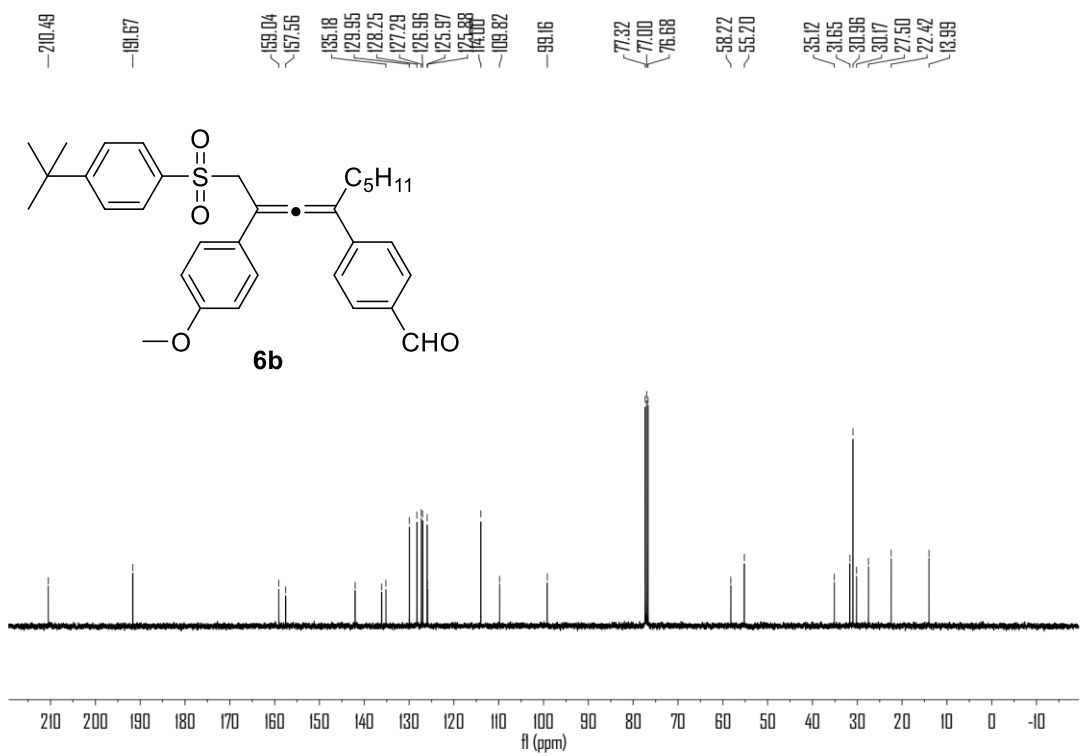

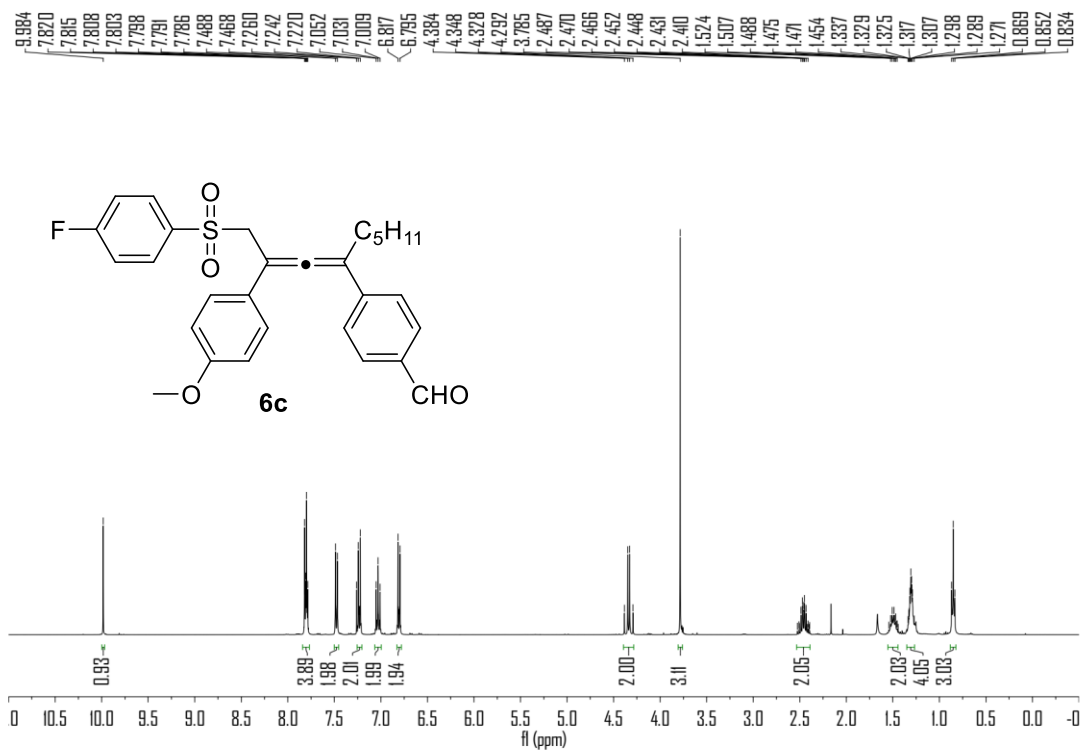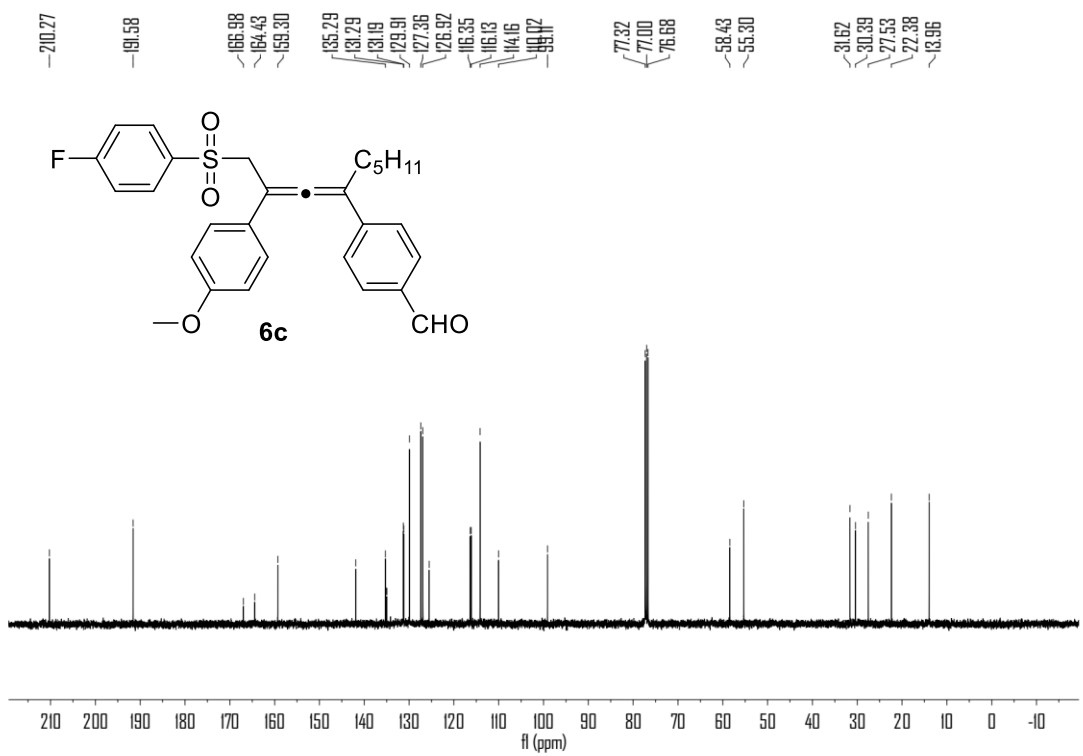



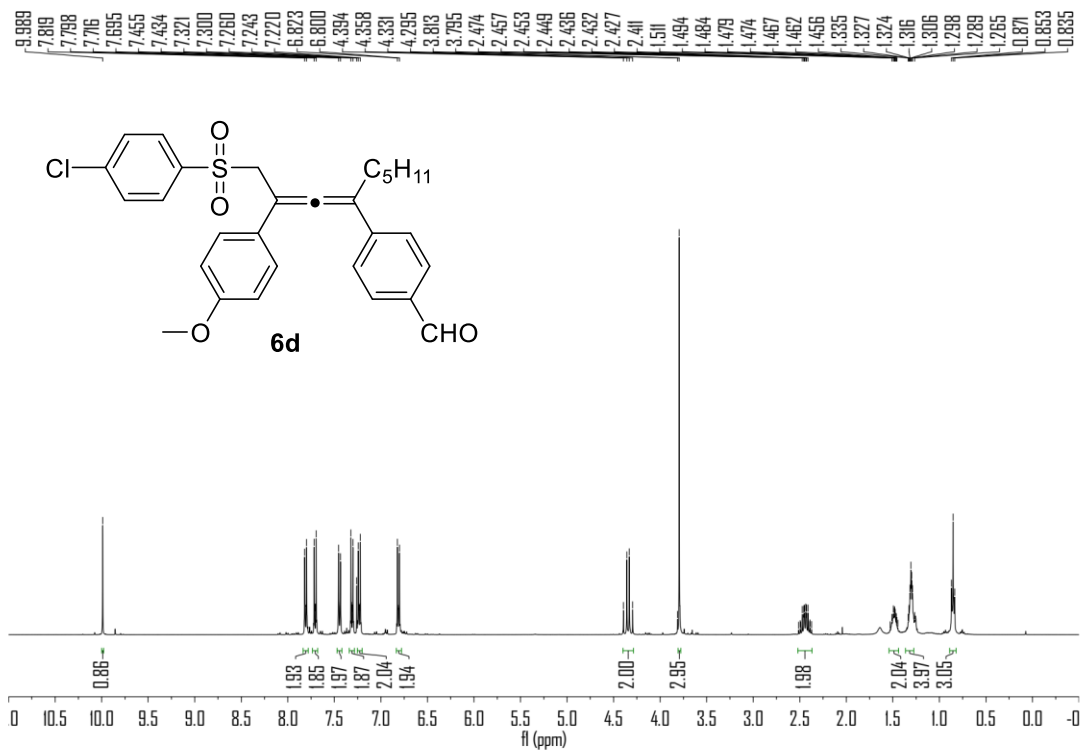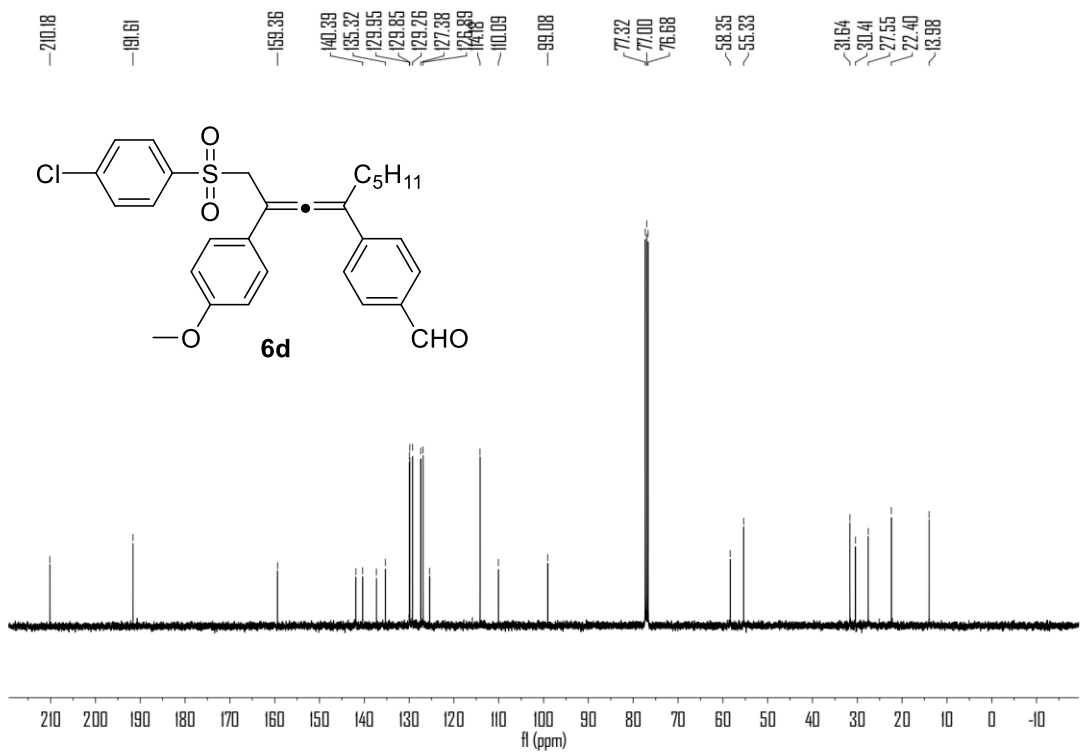

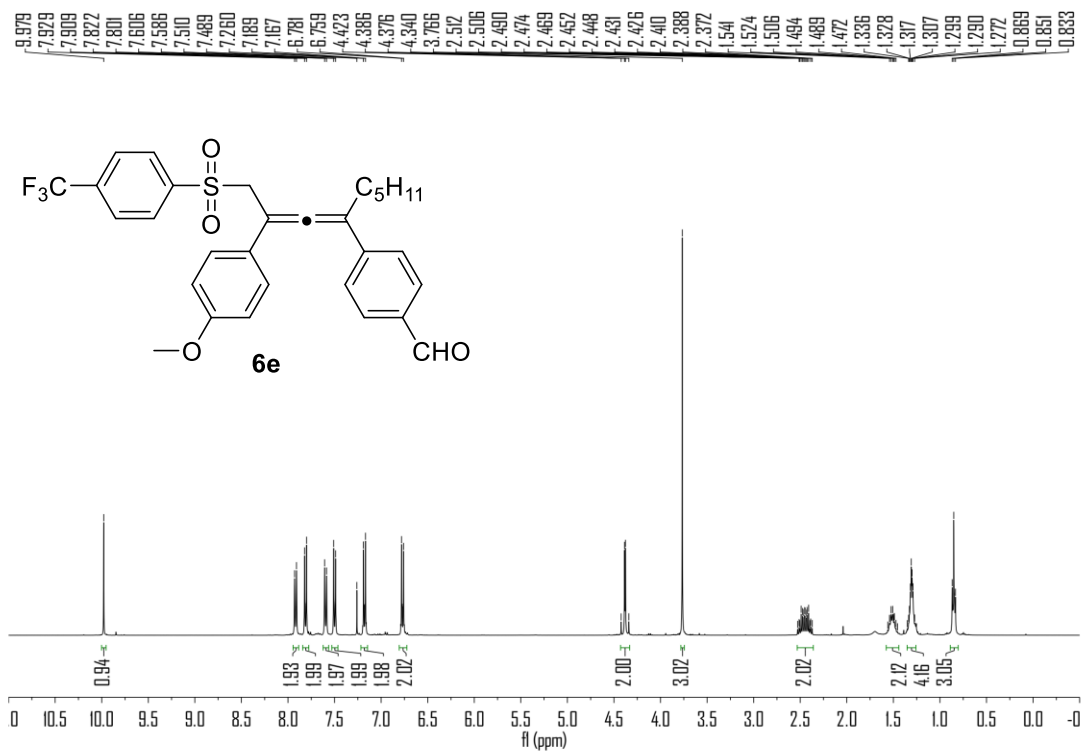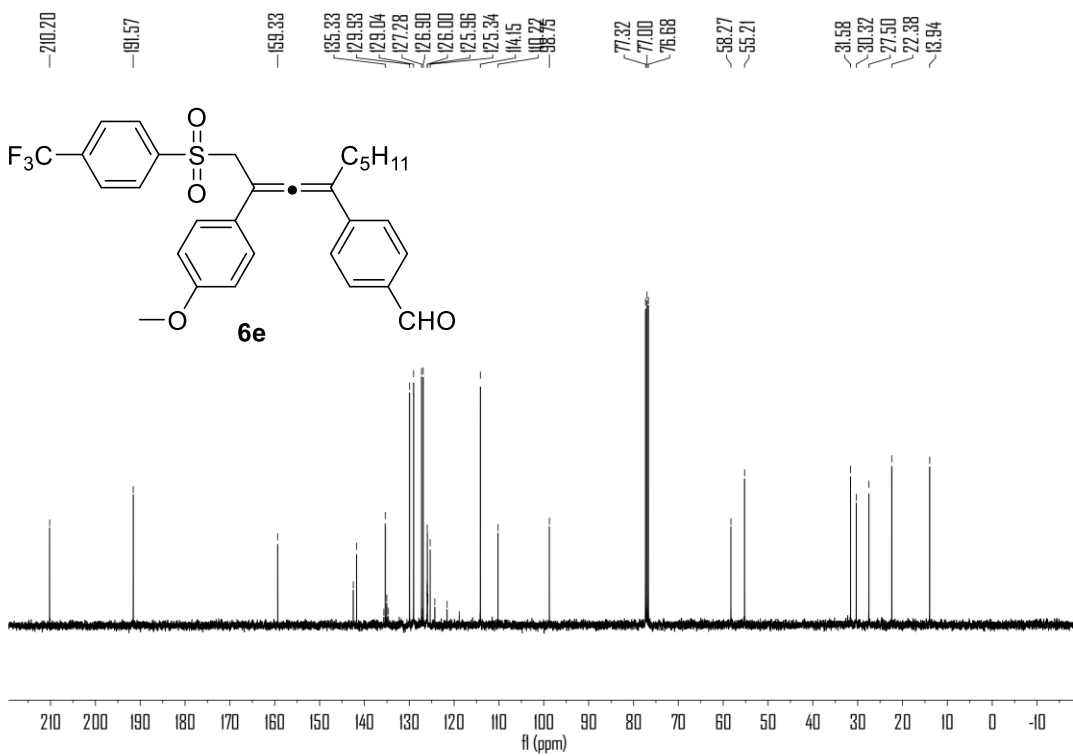

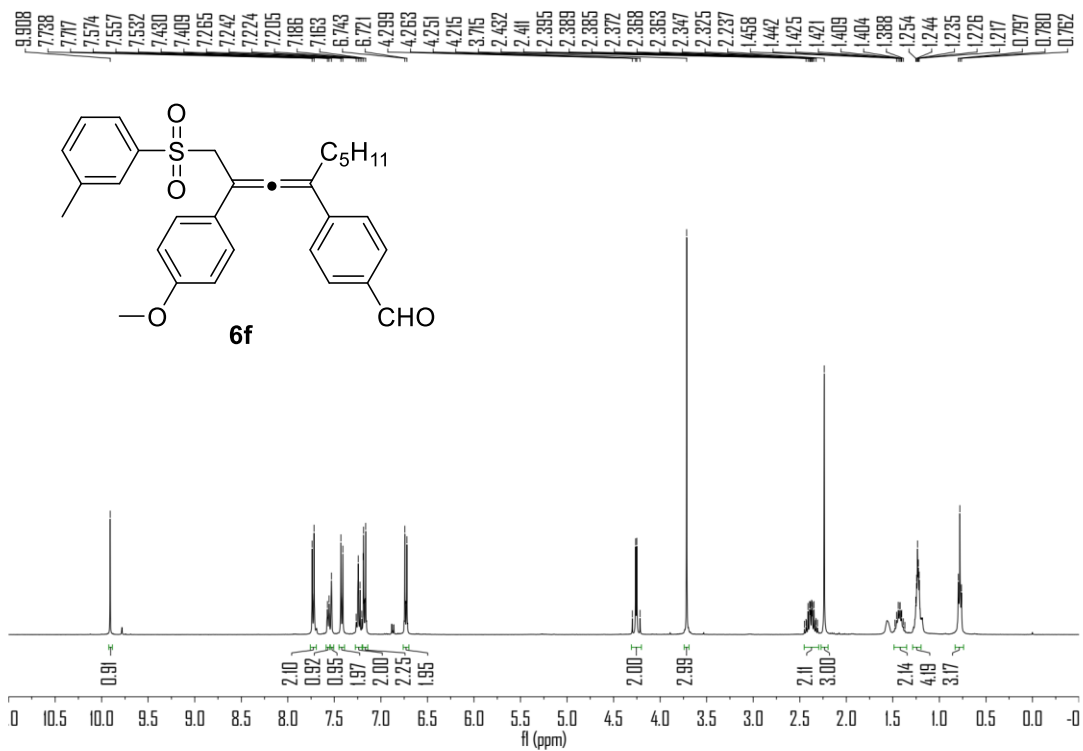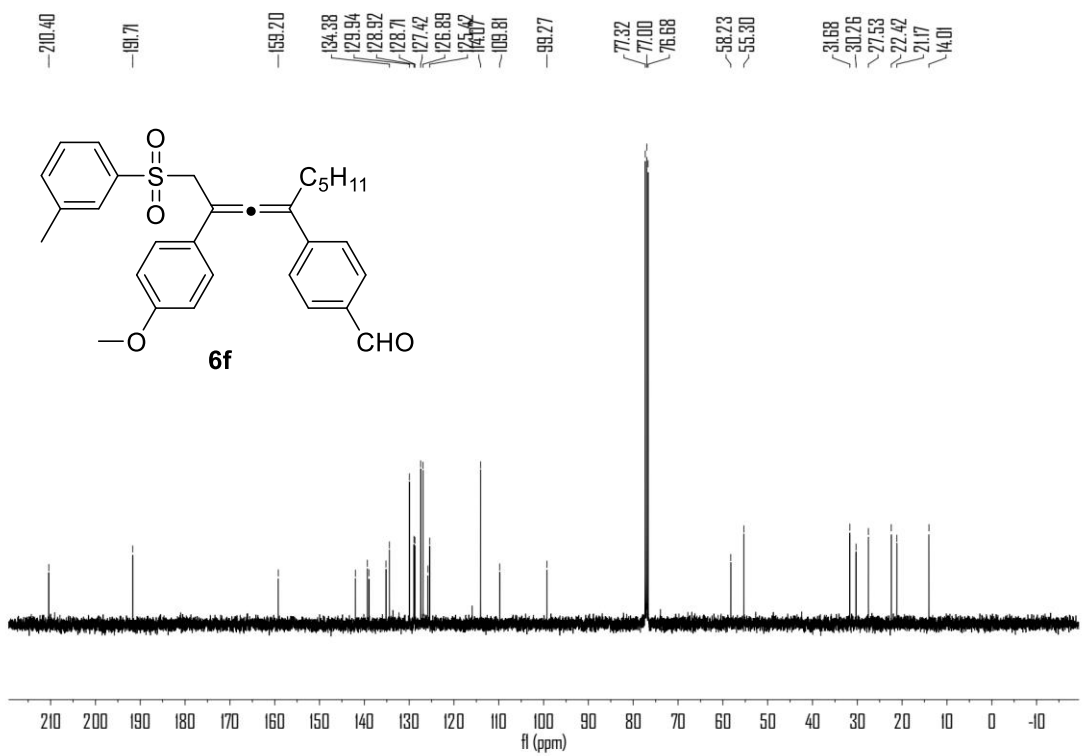

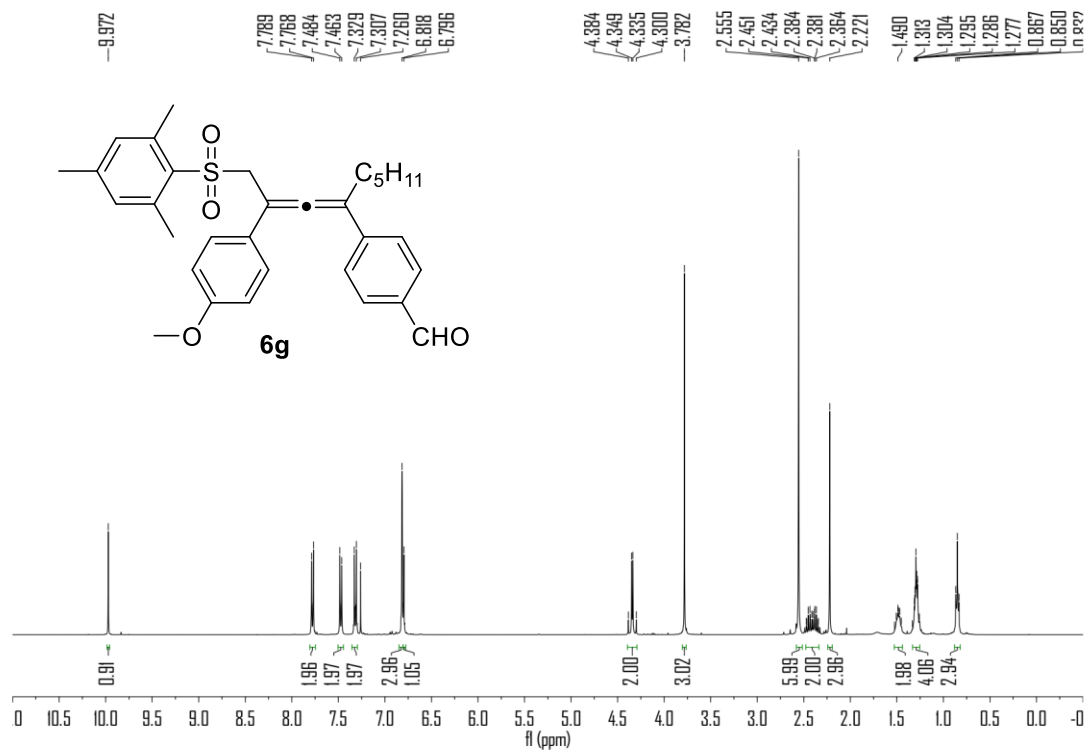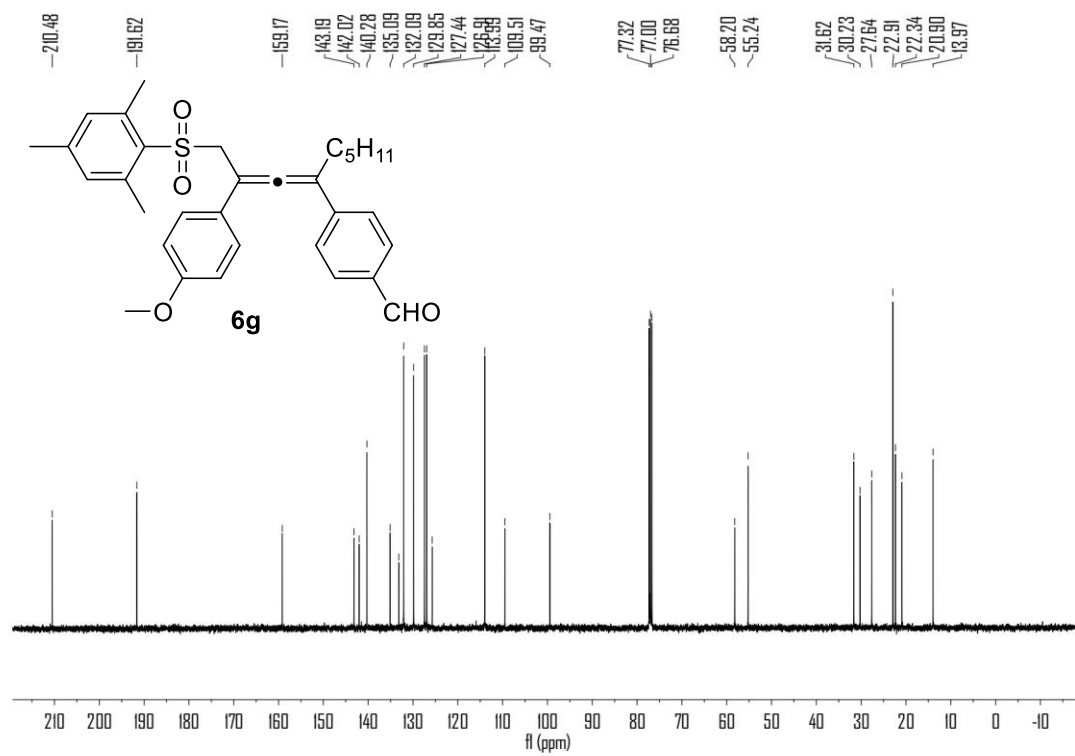

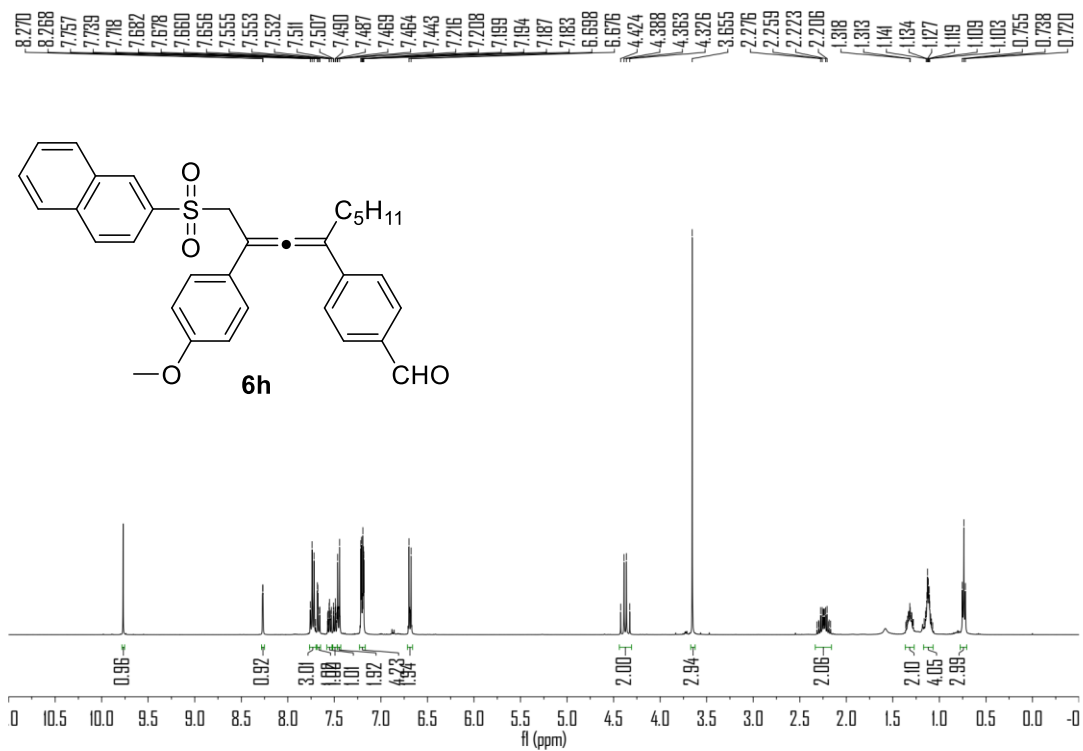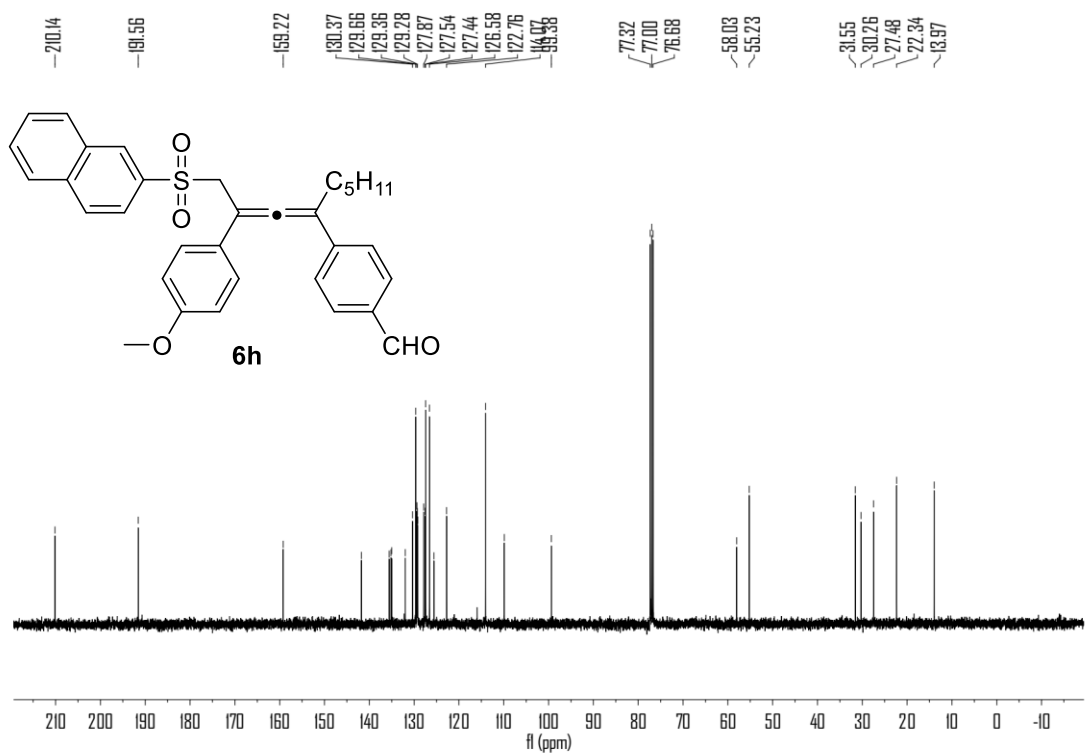

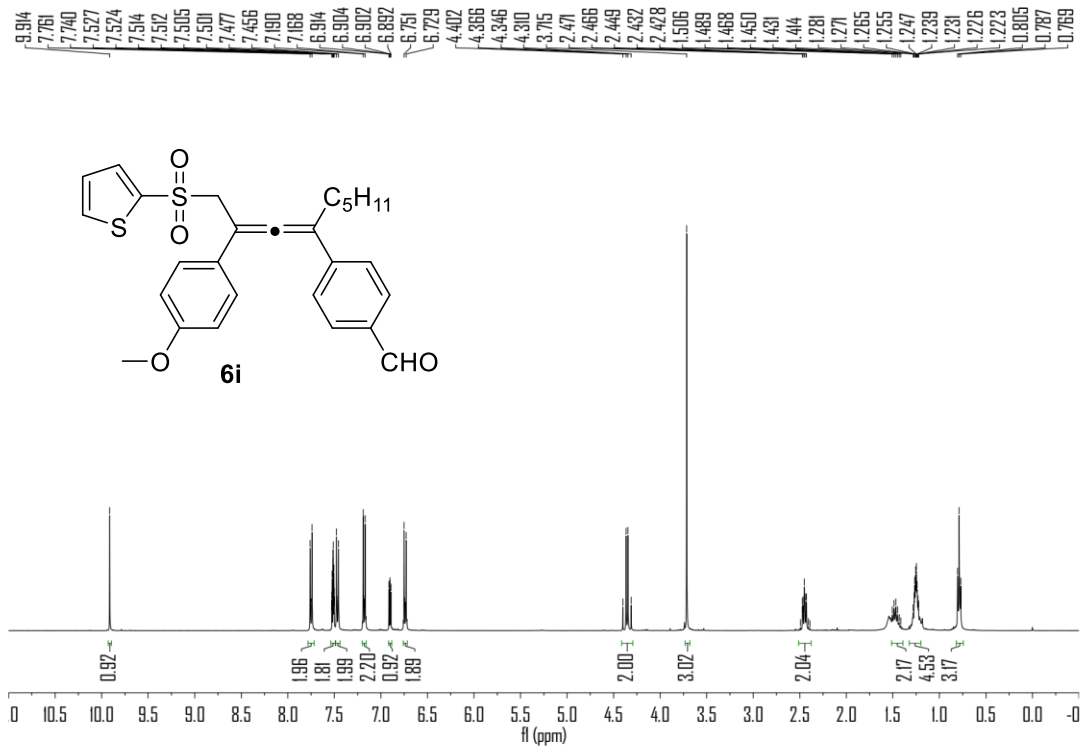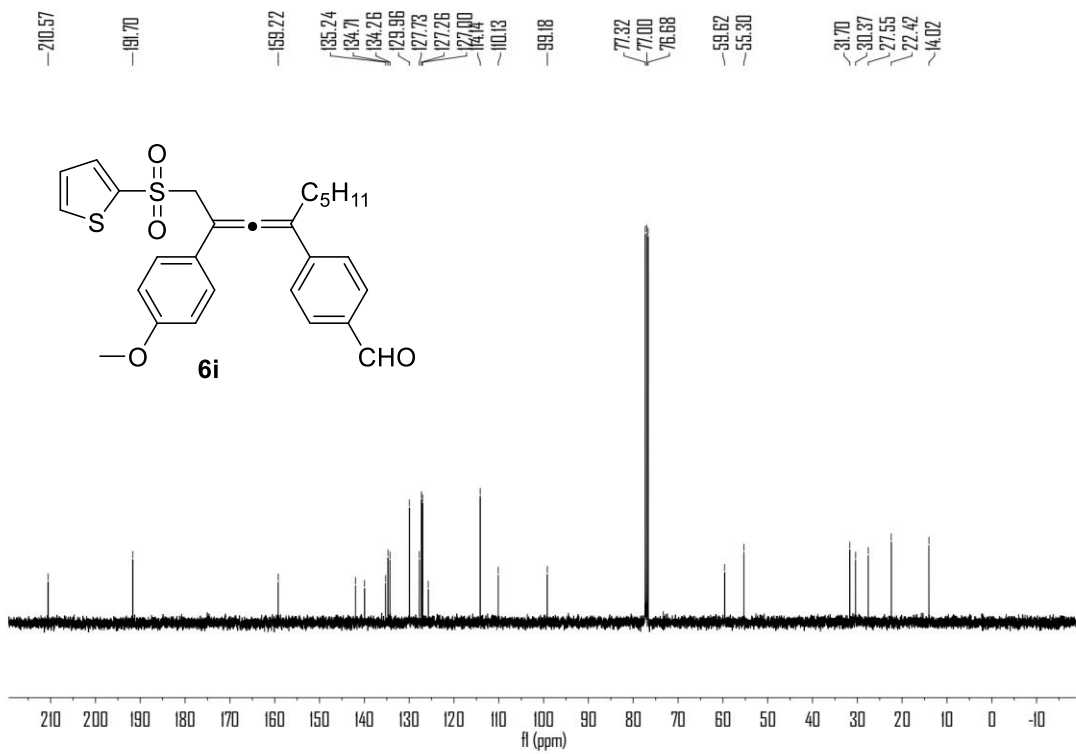

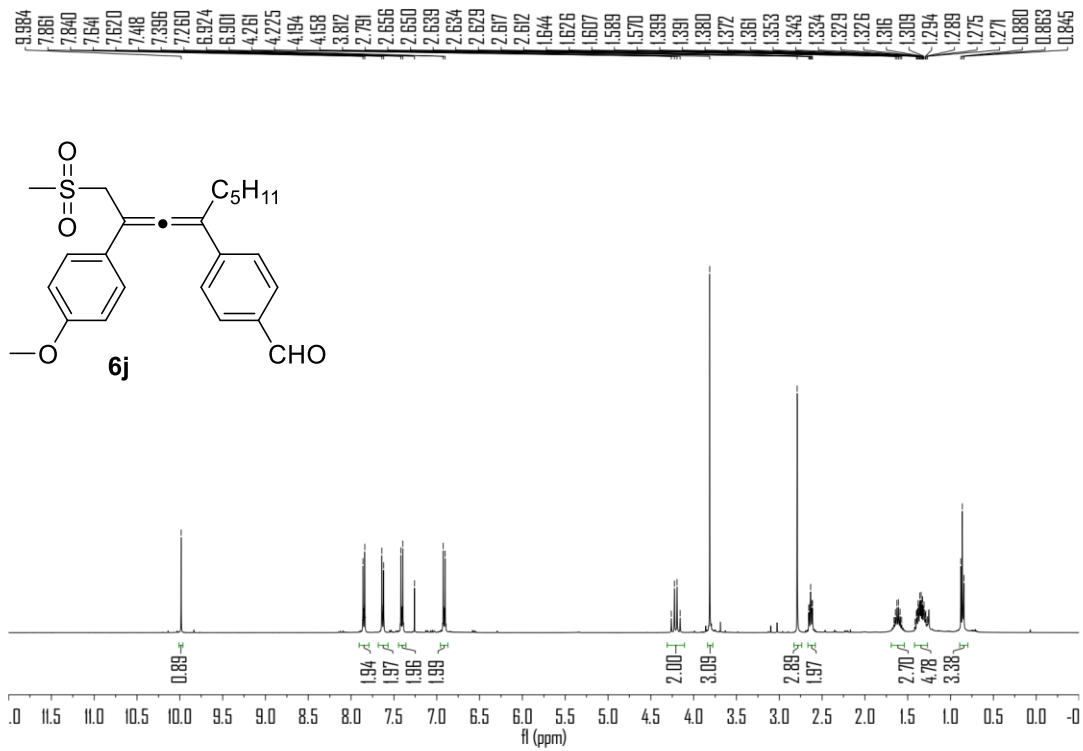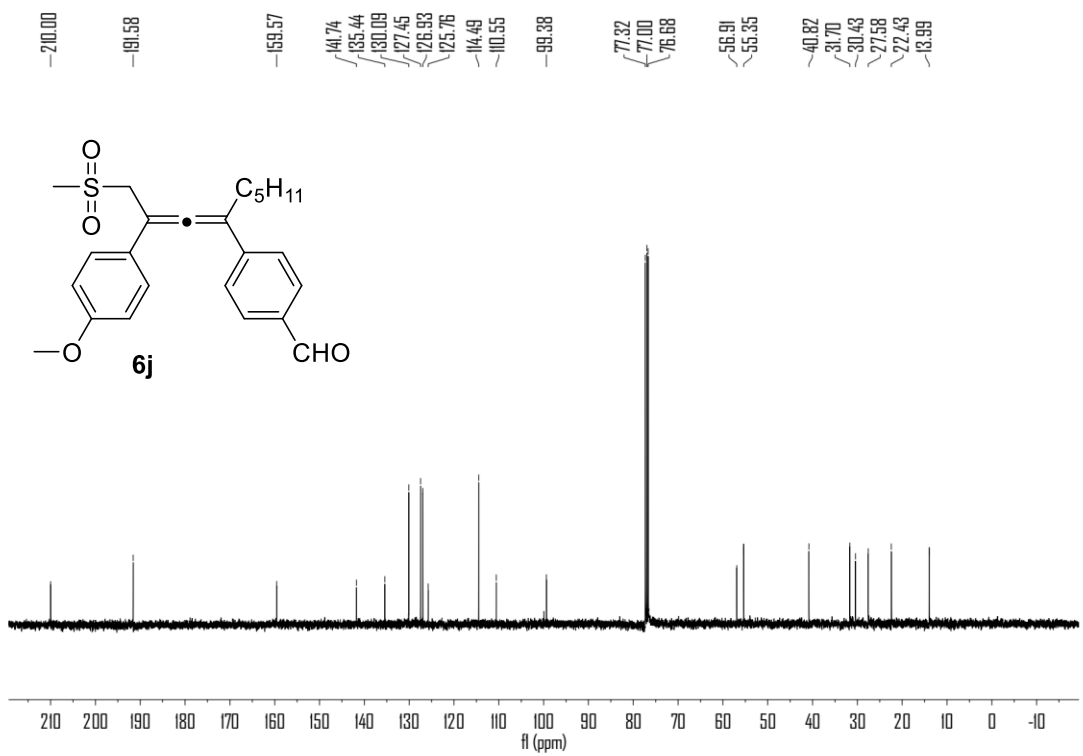

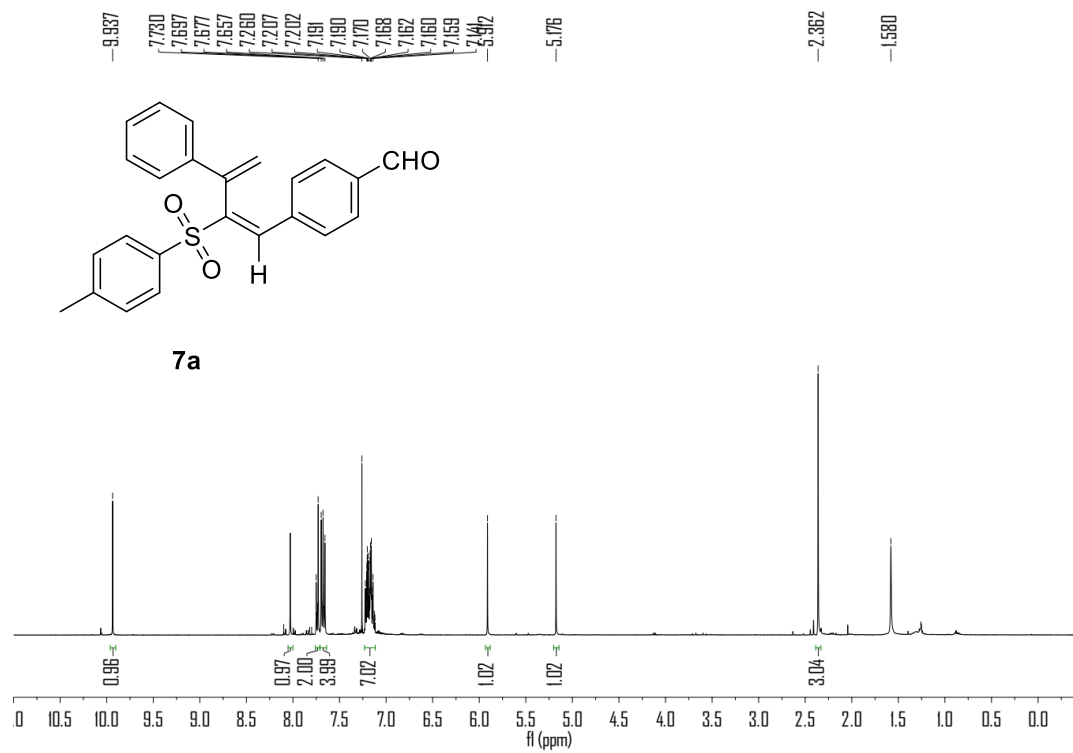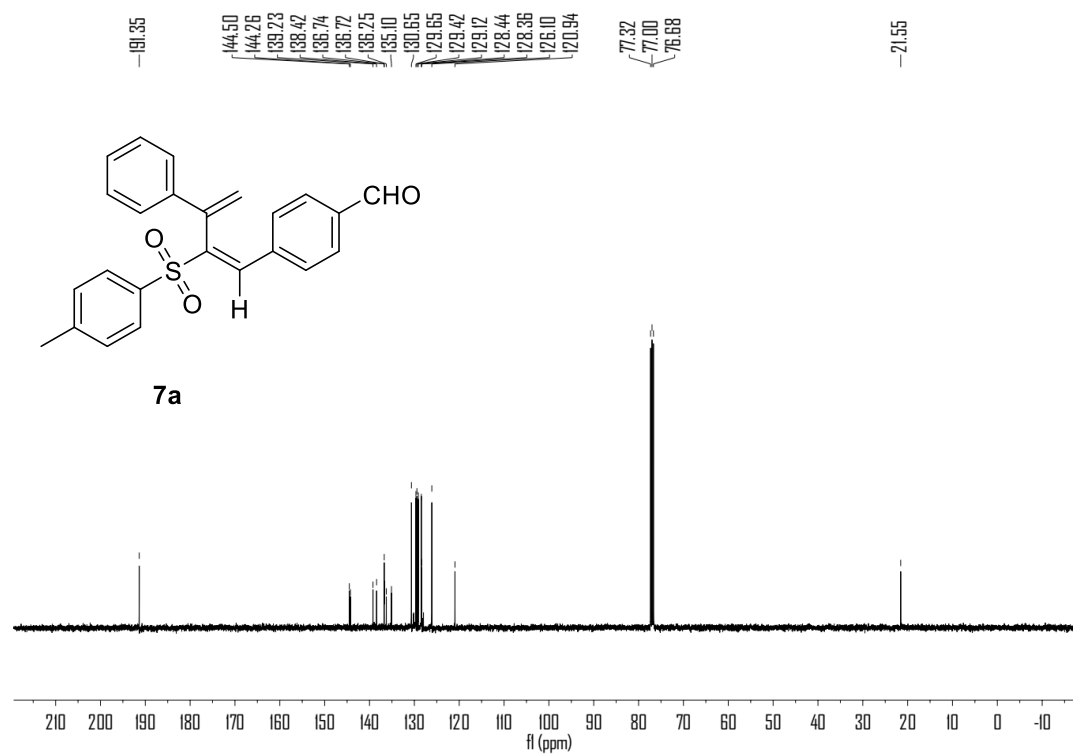



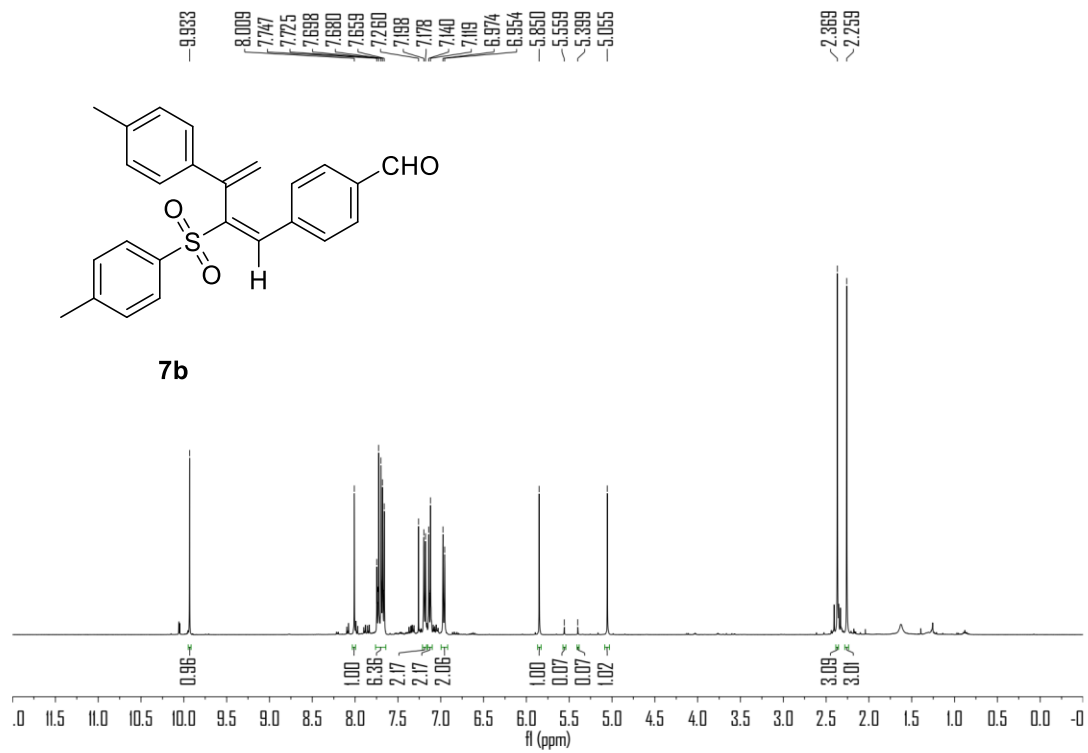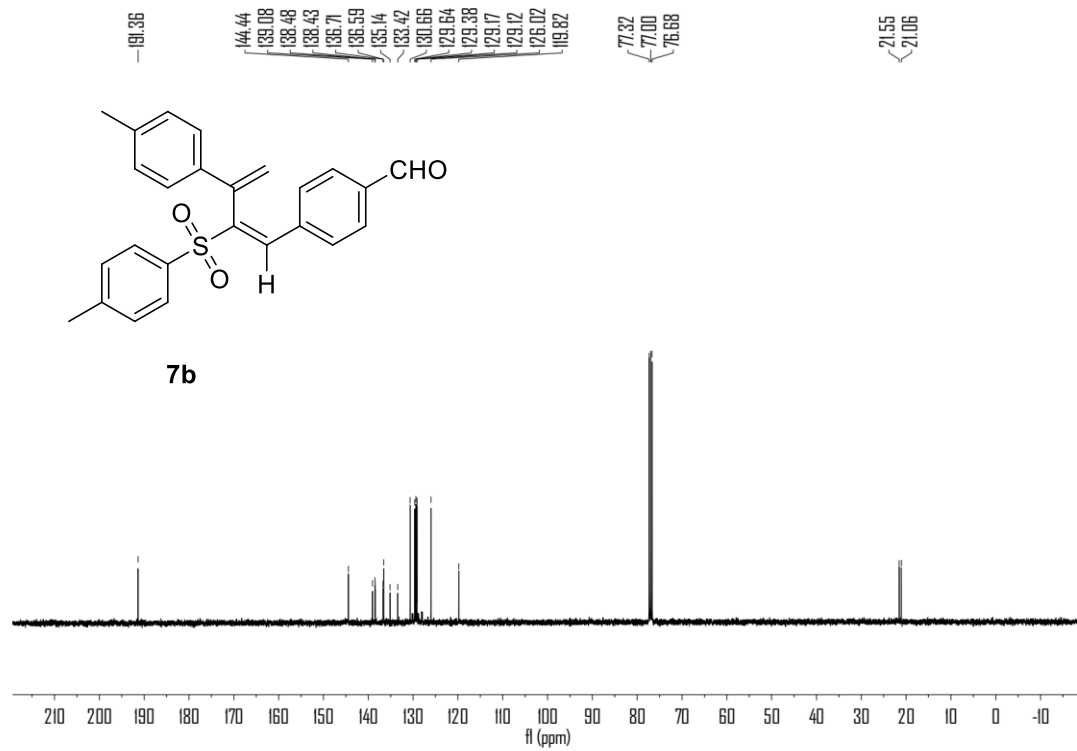

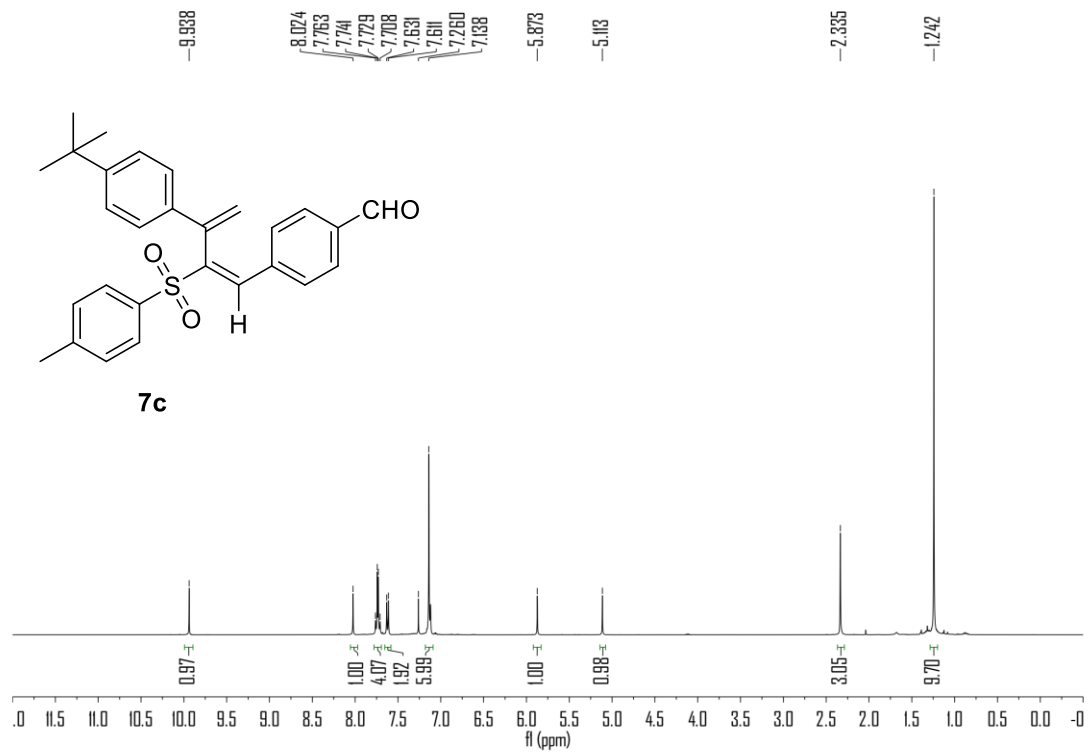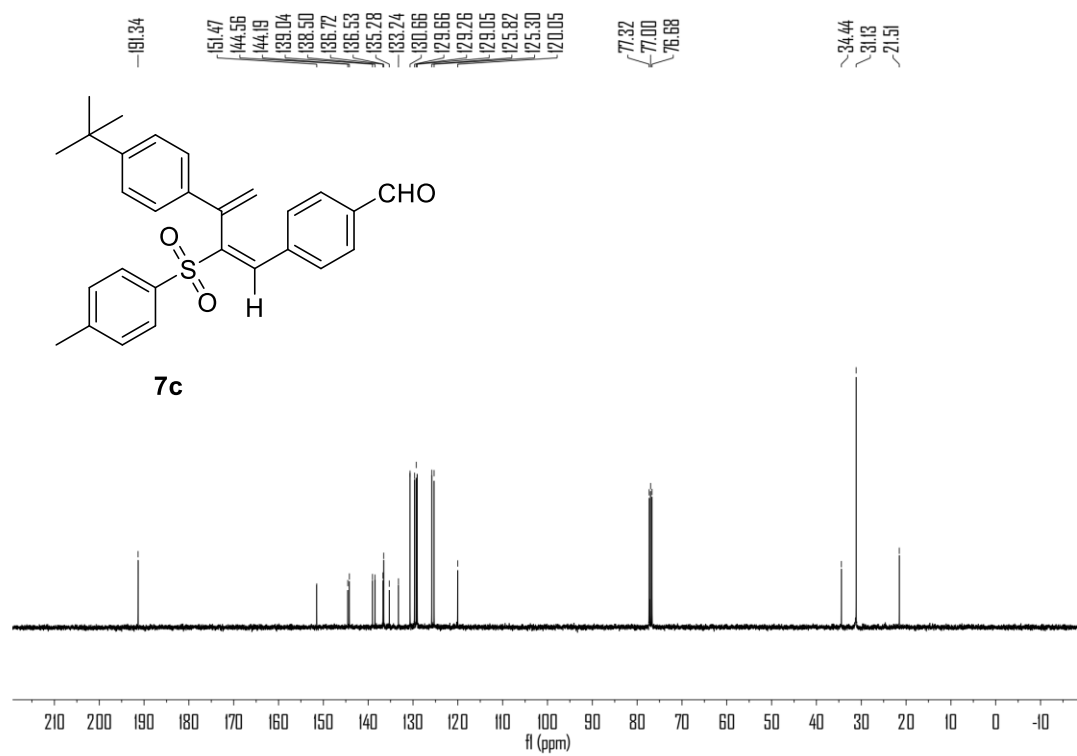

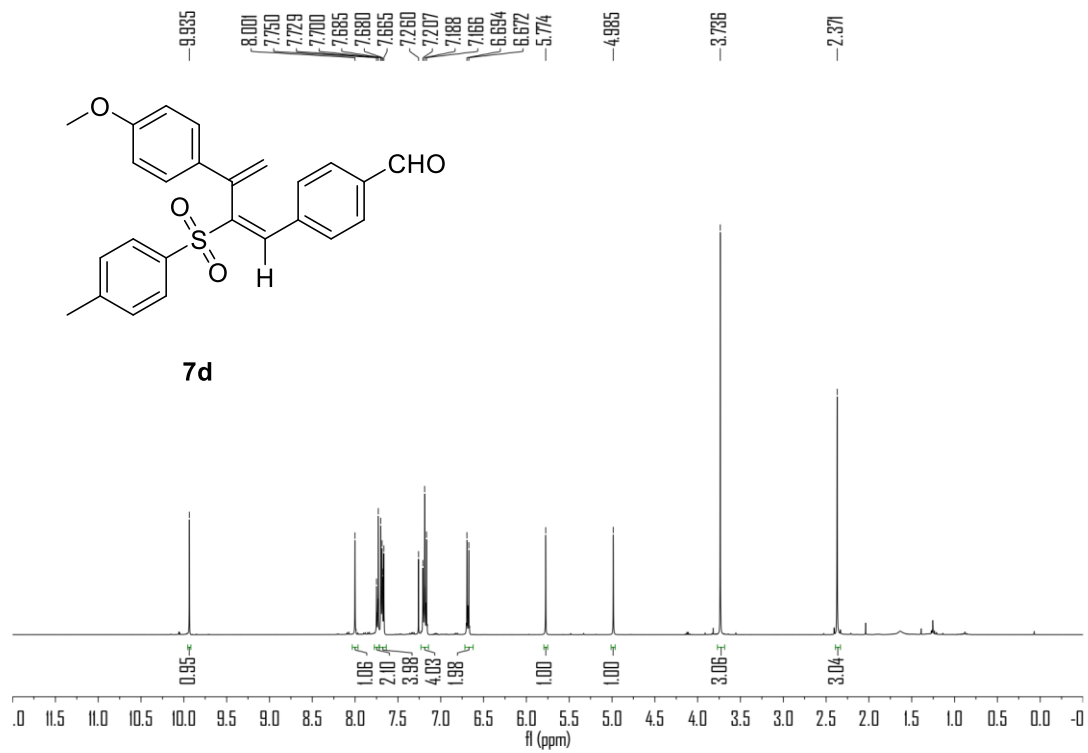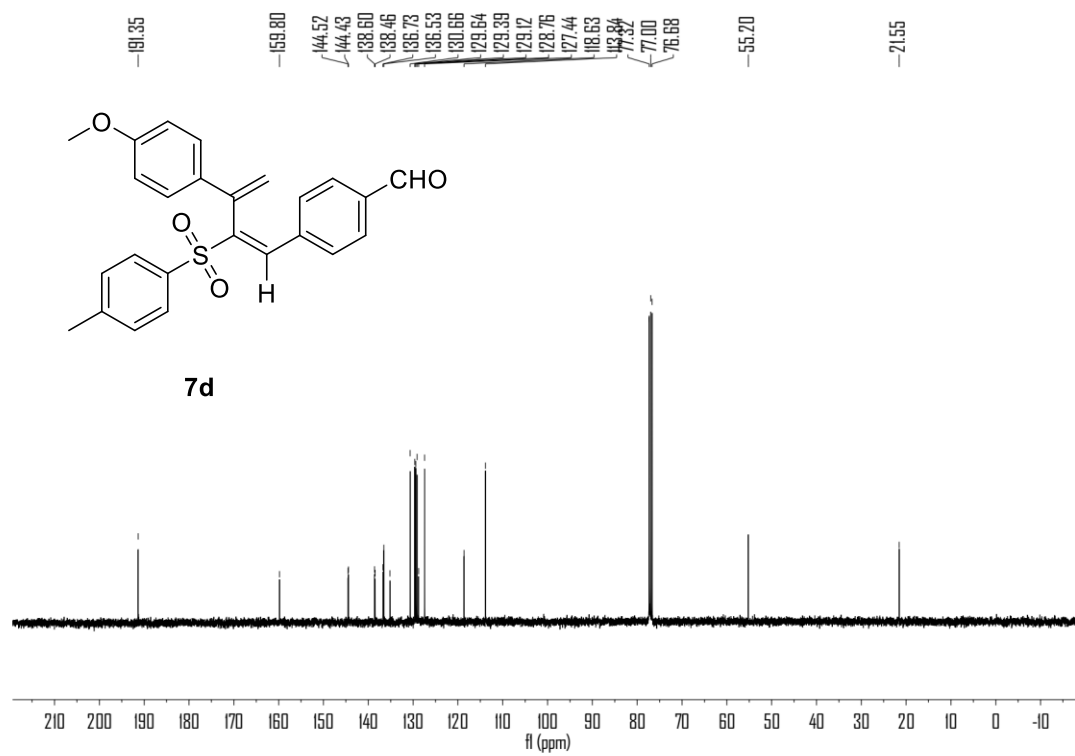

Nov05-2020-cy-s2-105-2.22.fid

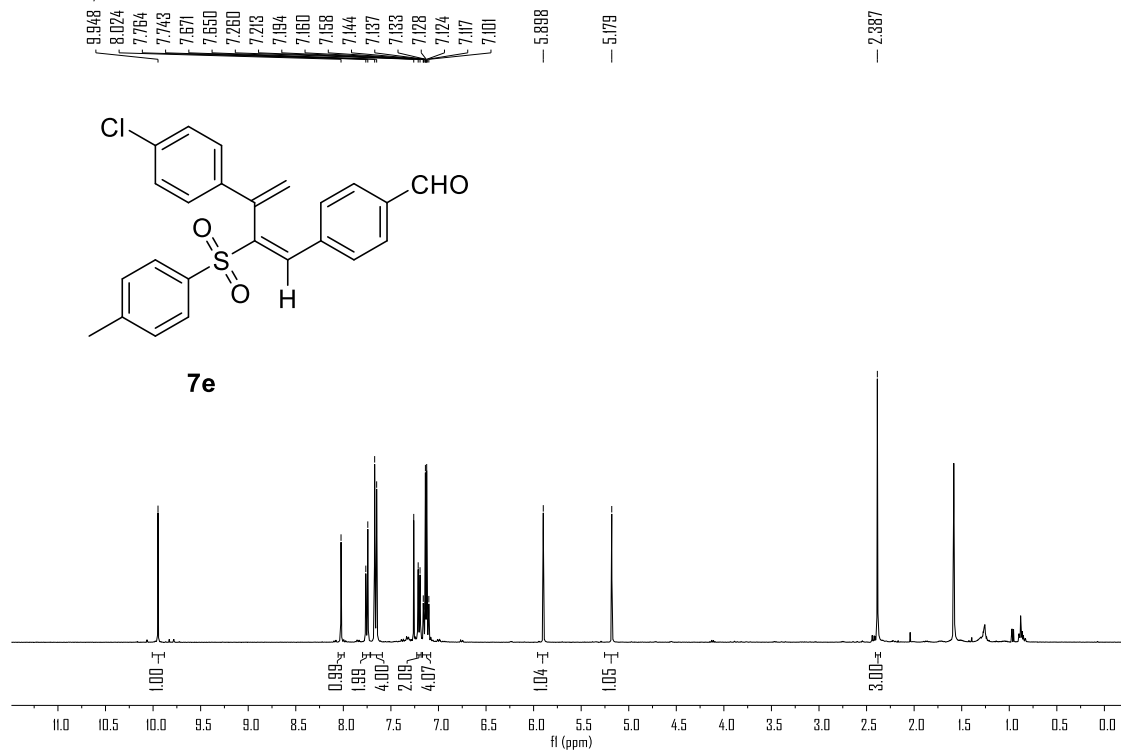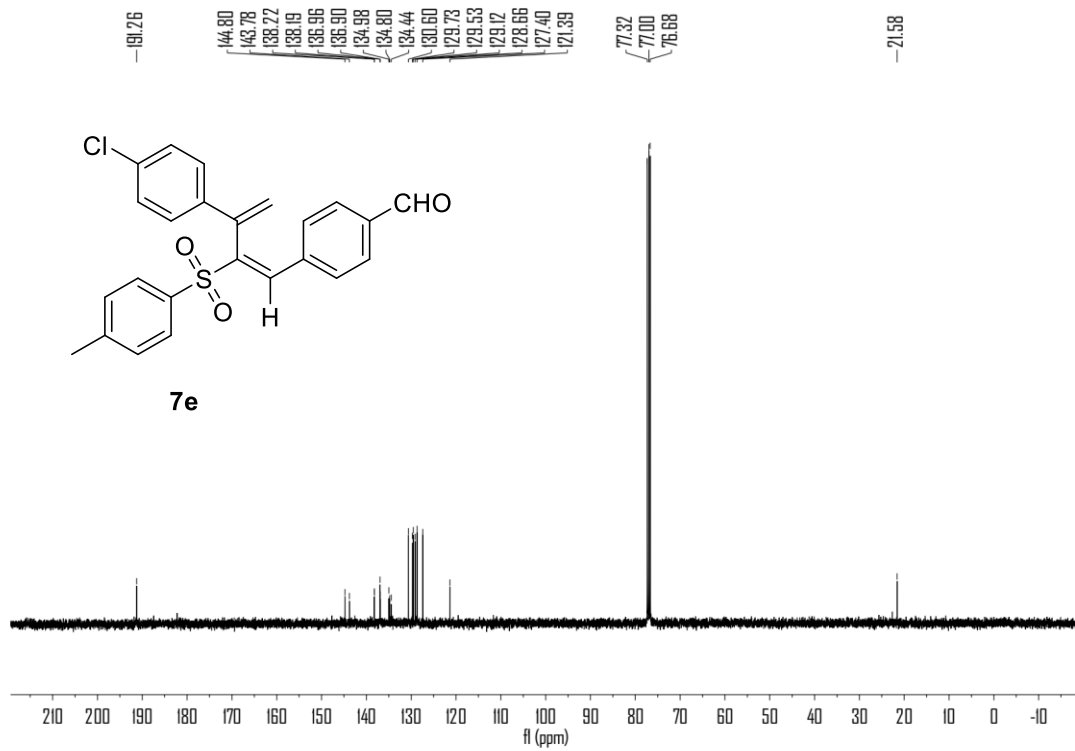

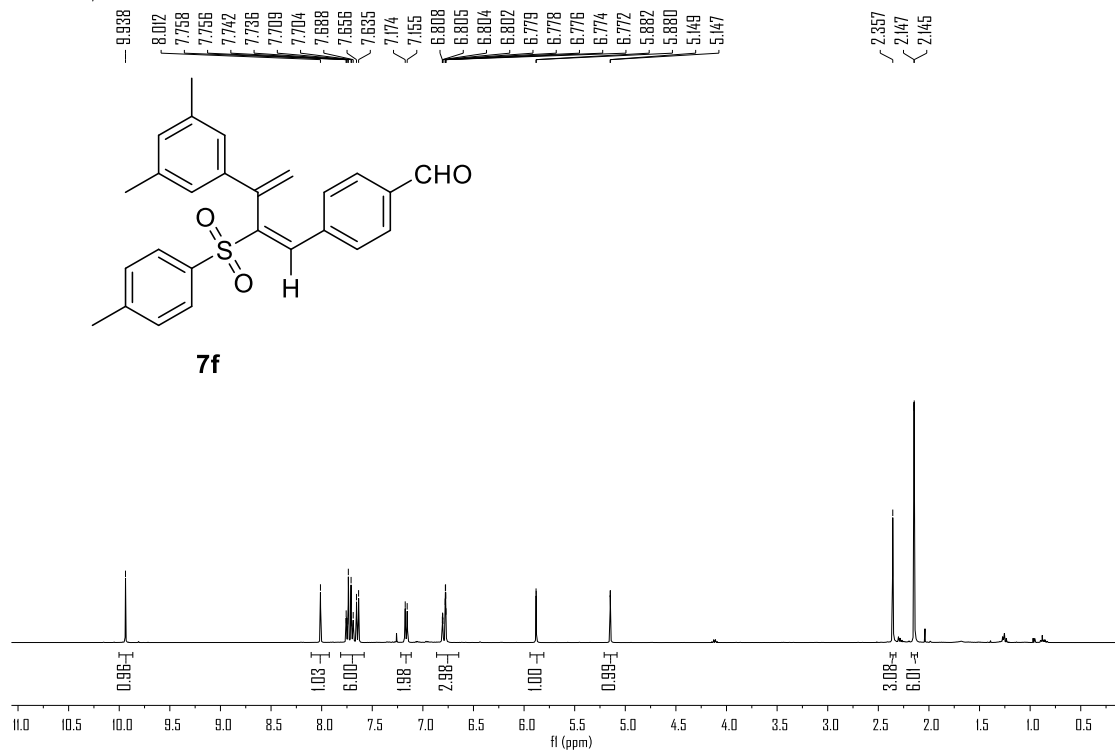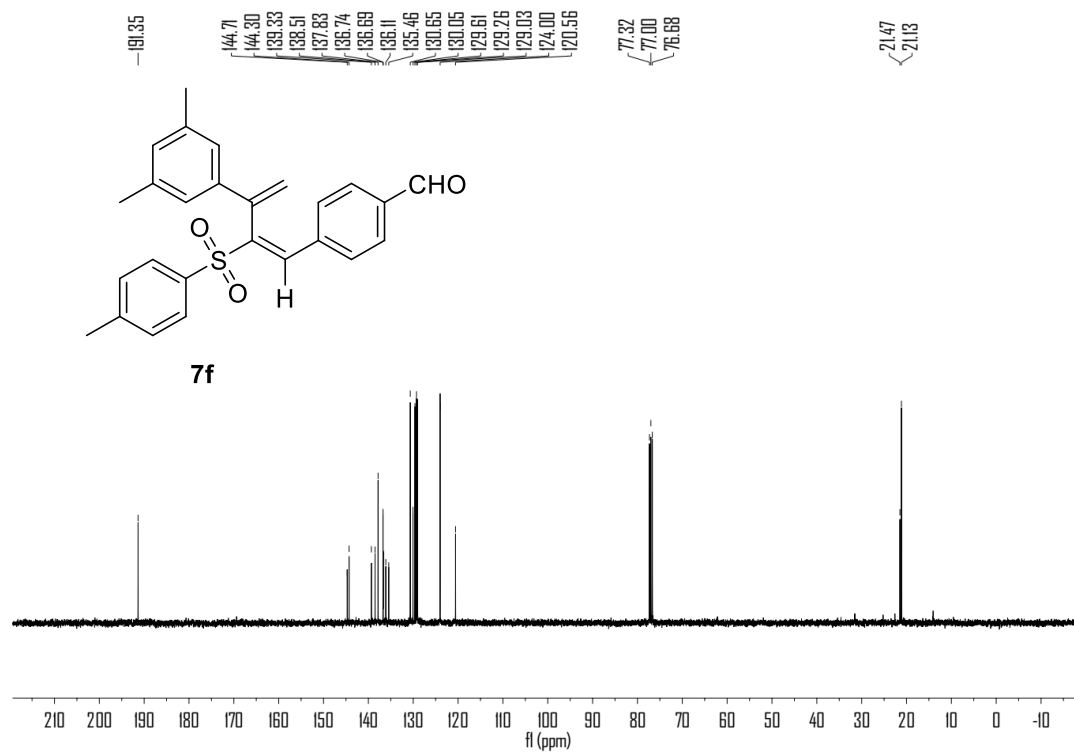

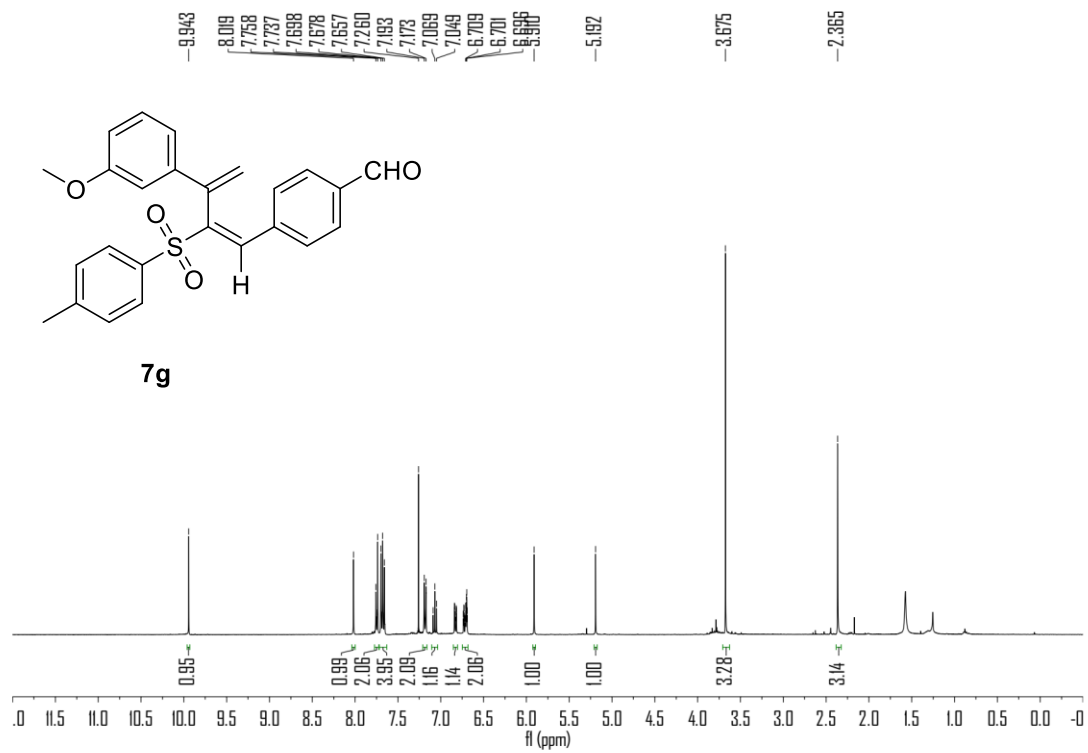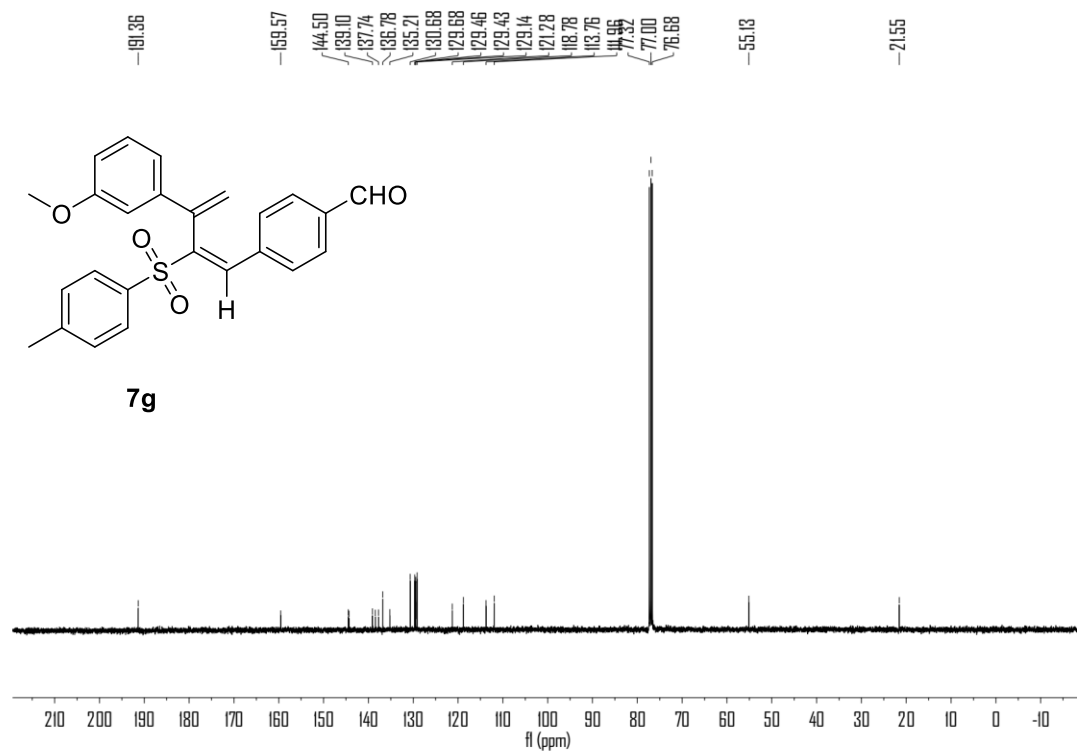

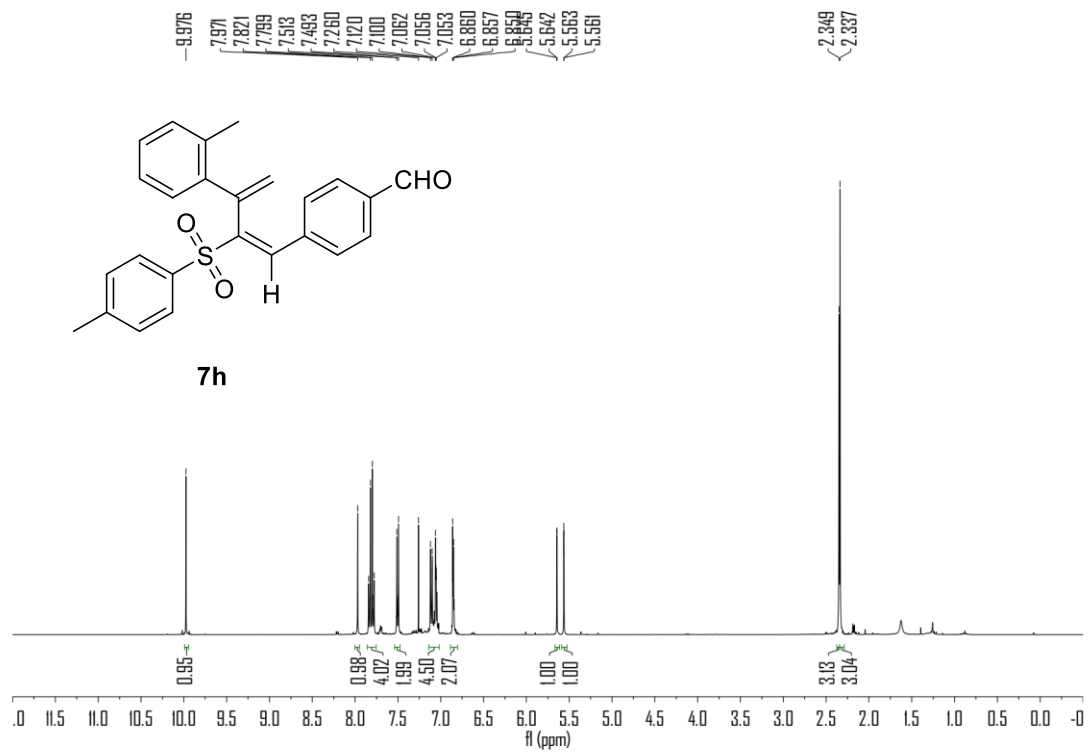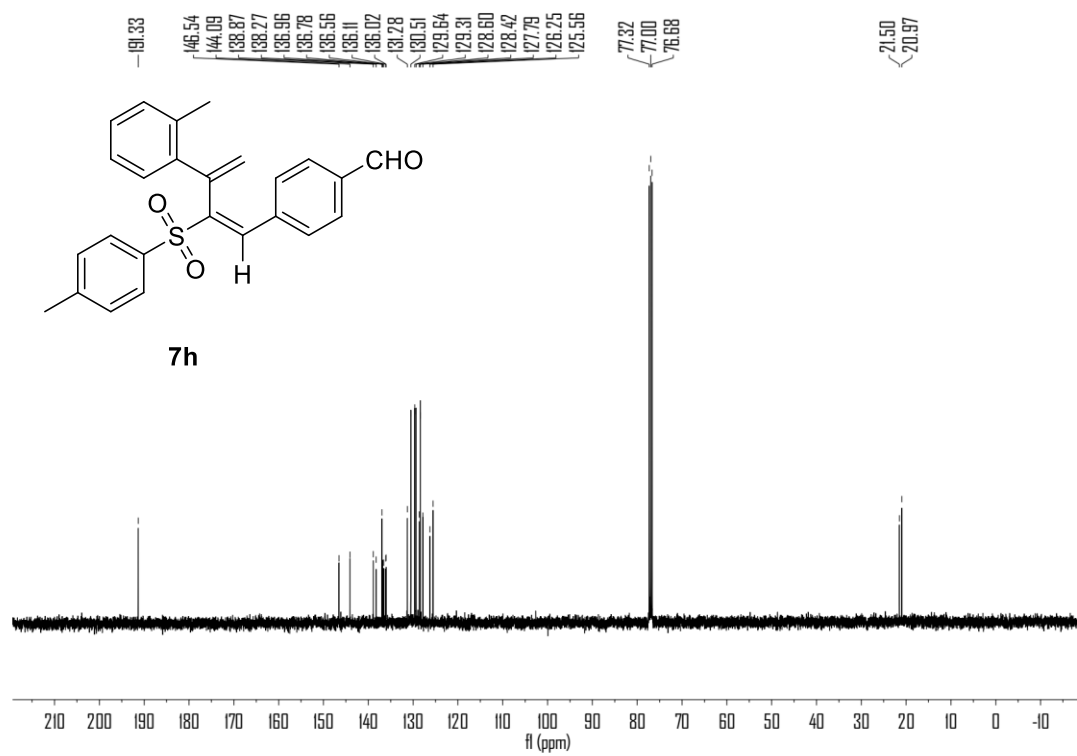

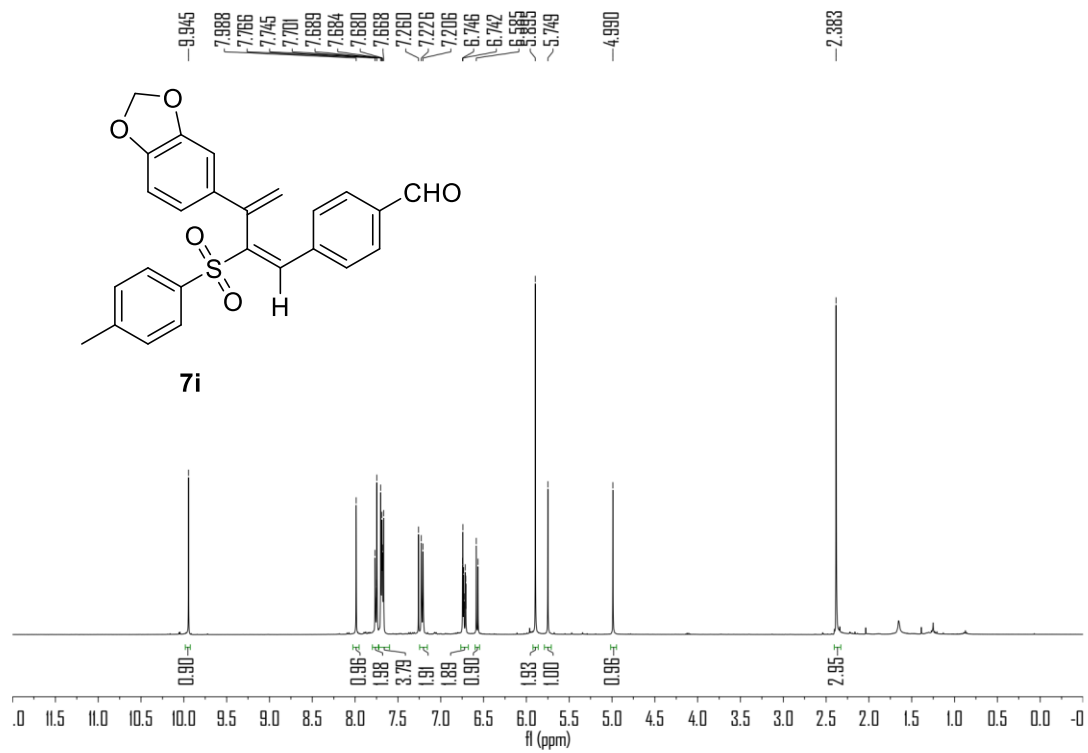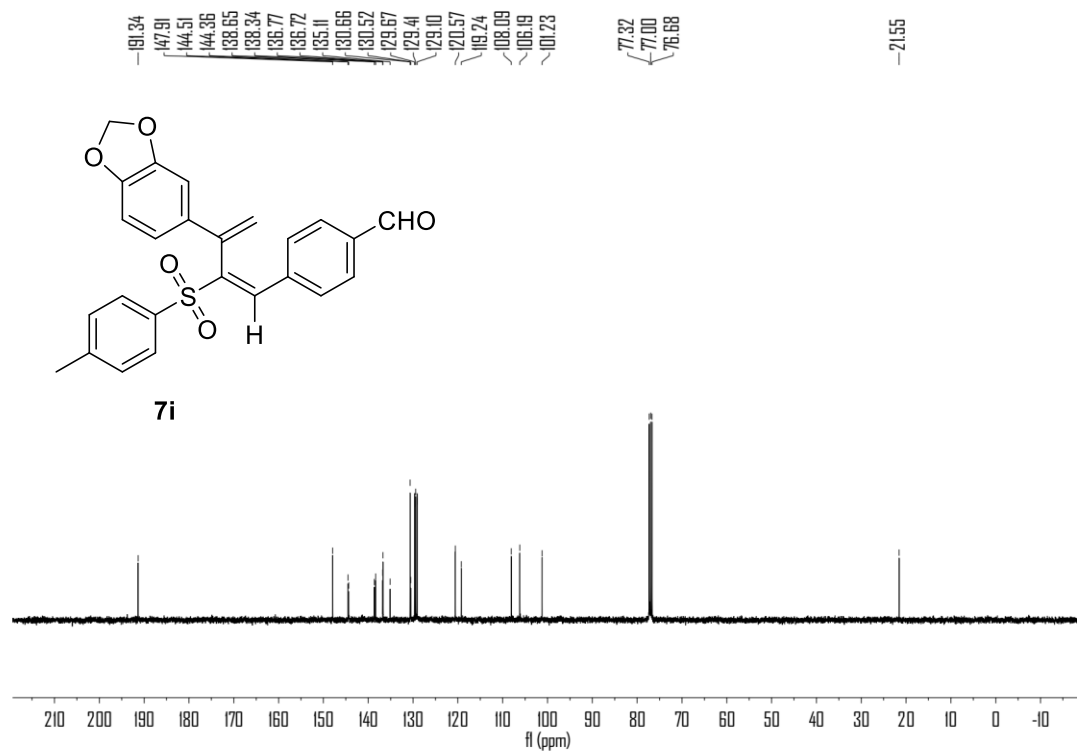



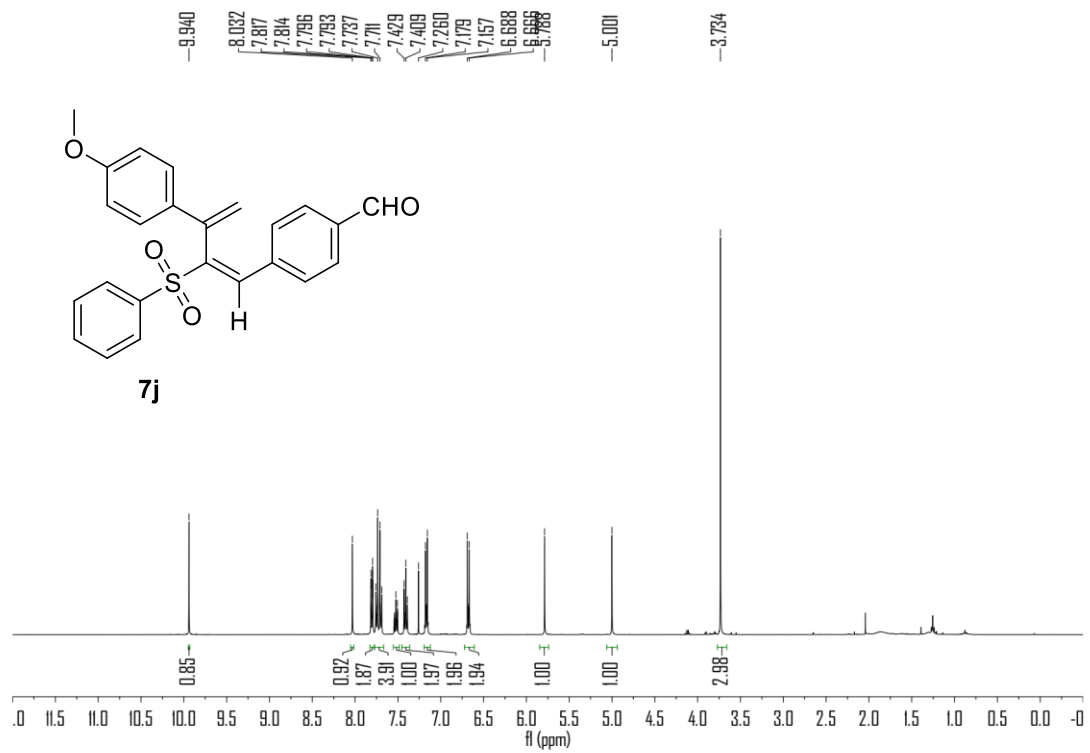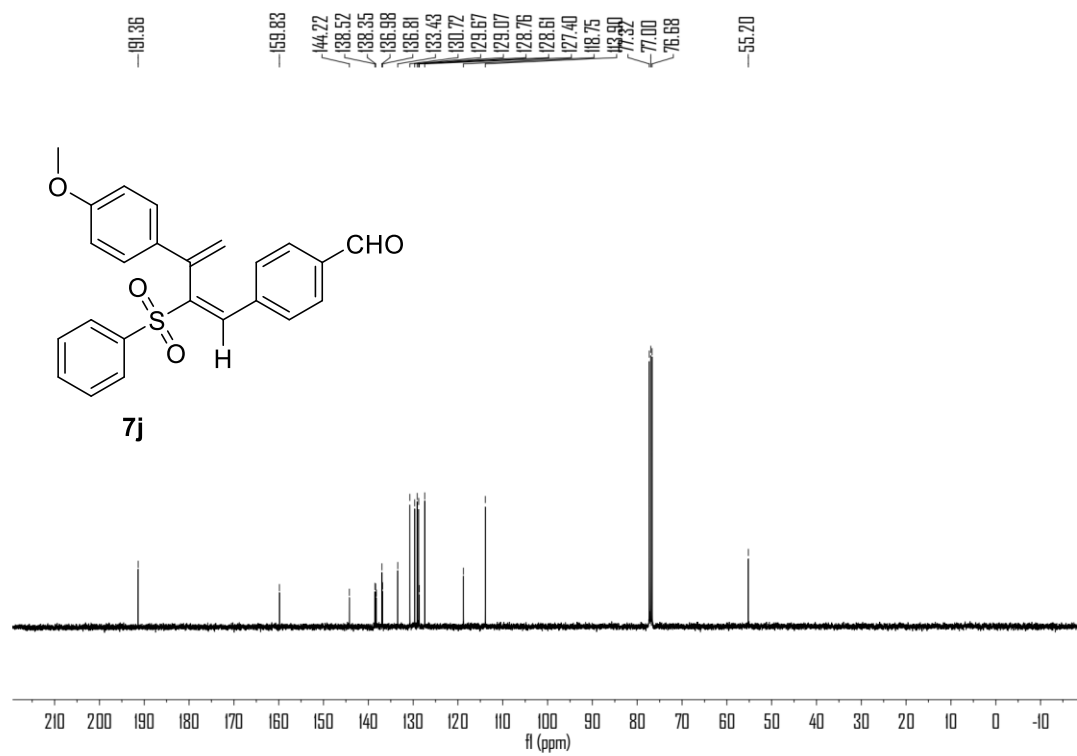

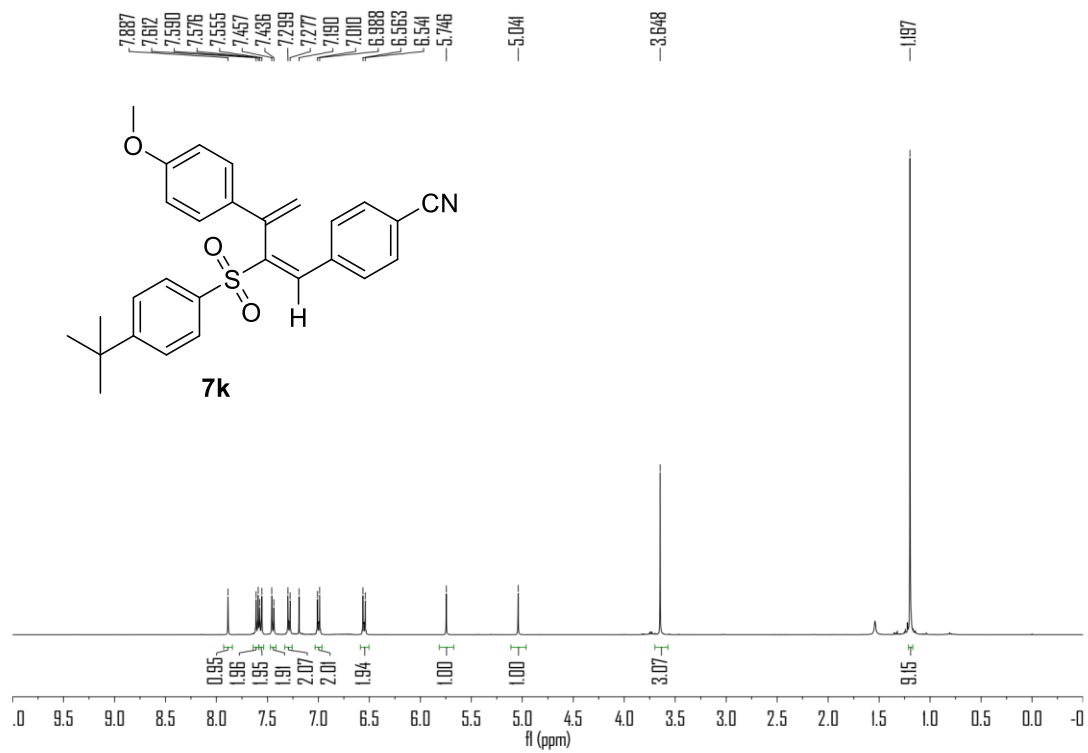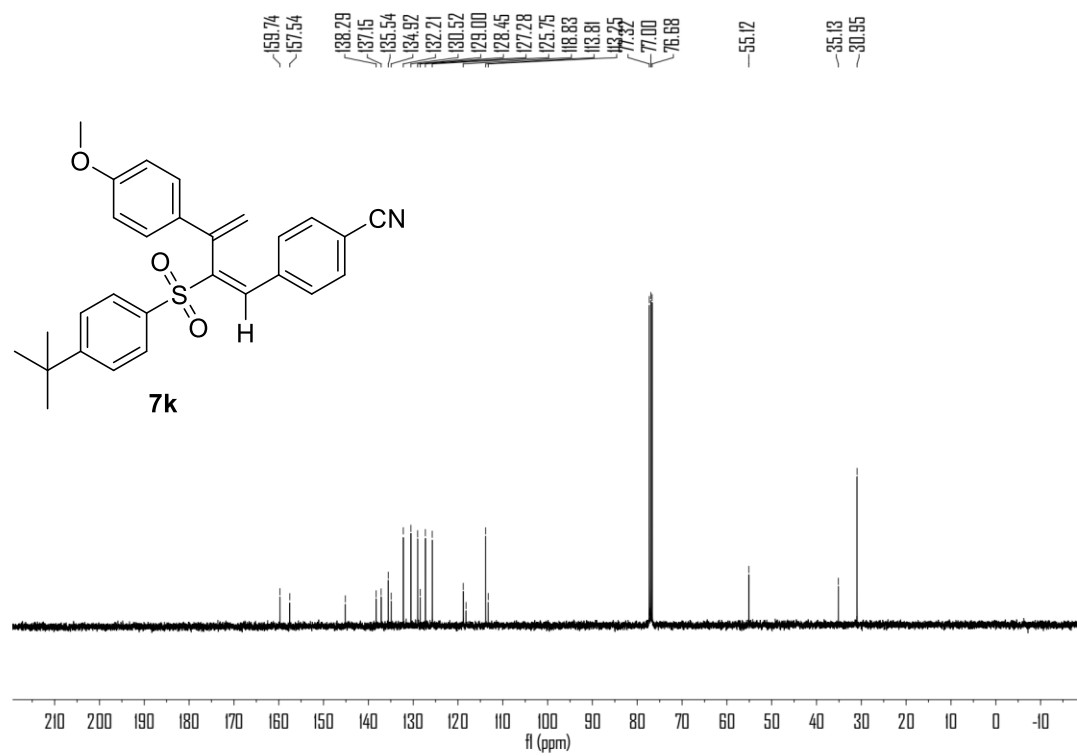

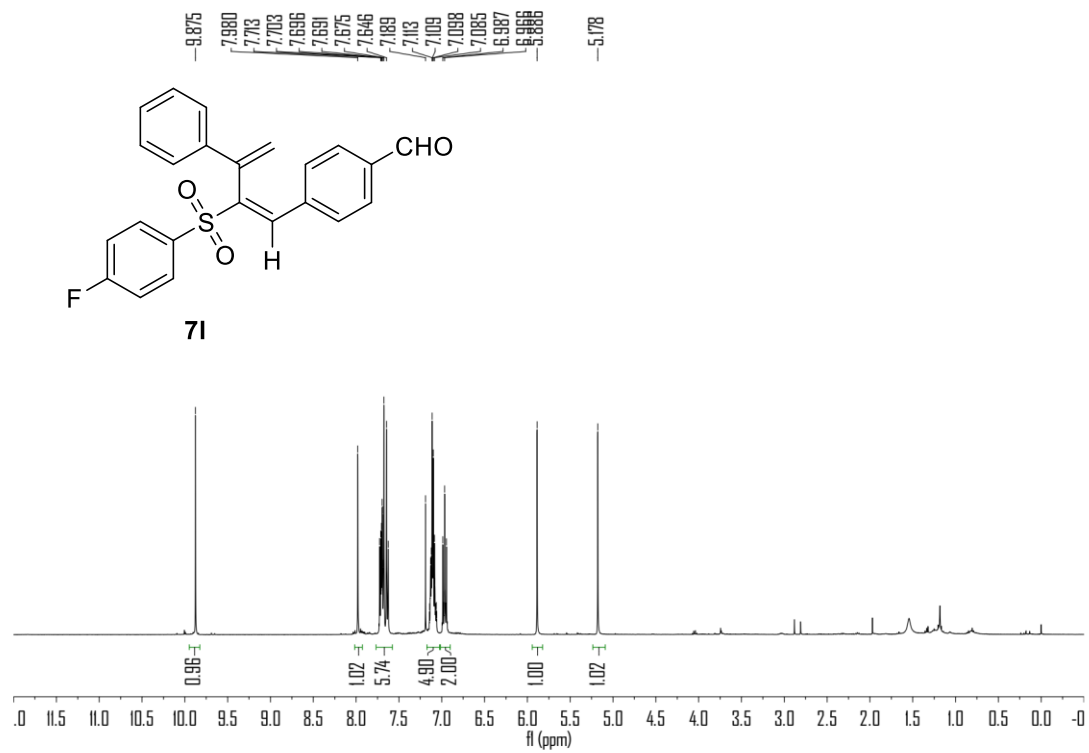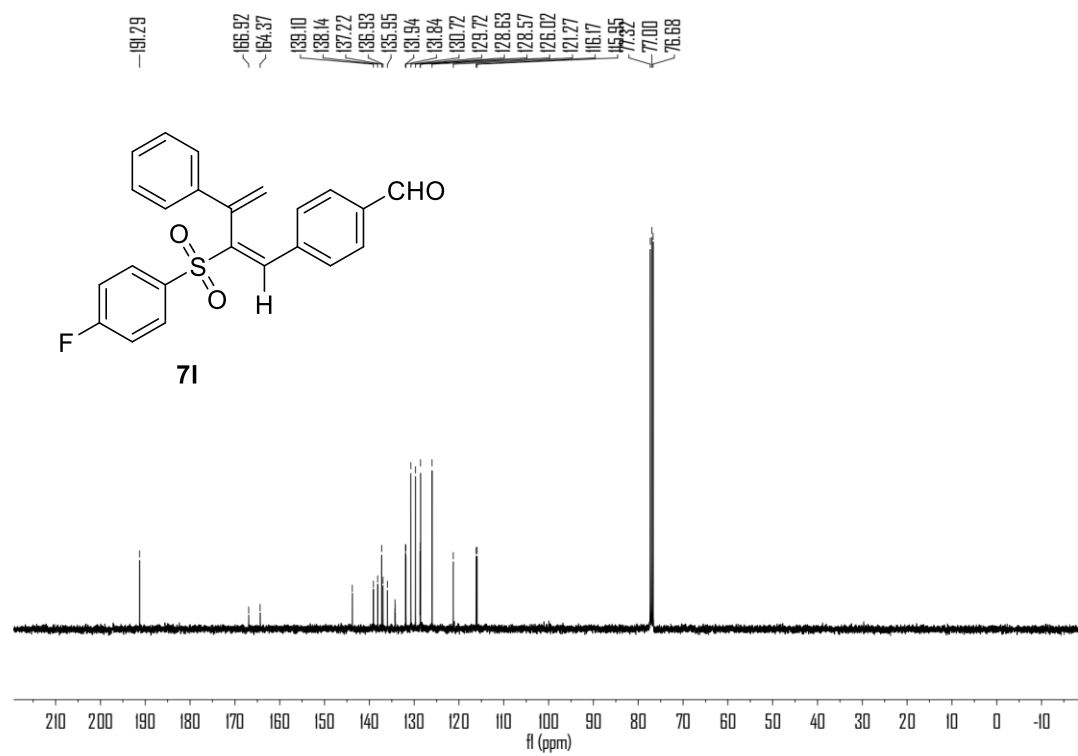



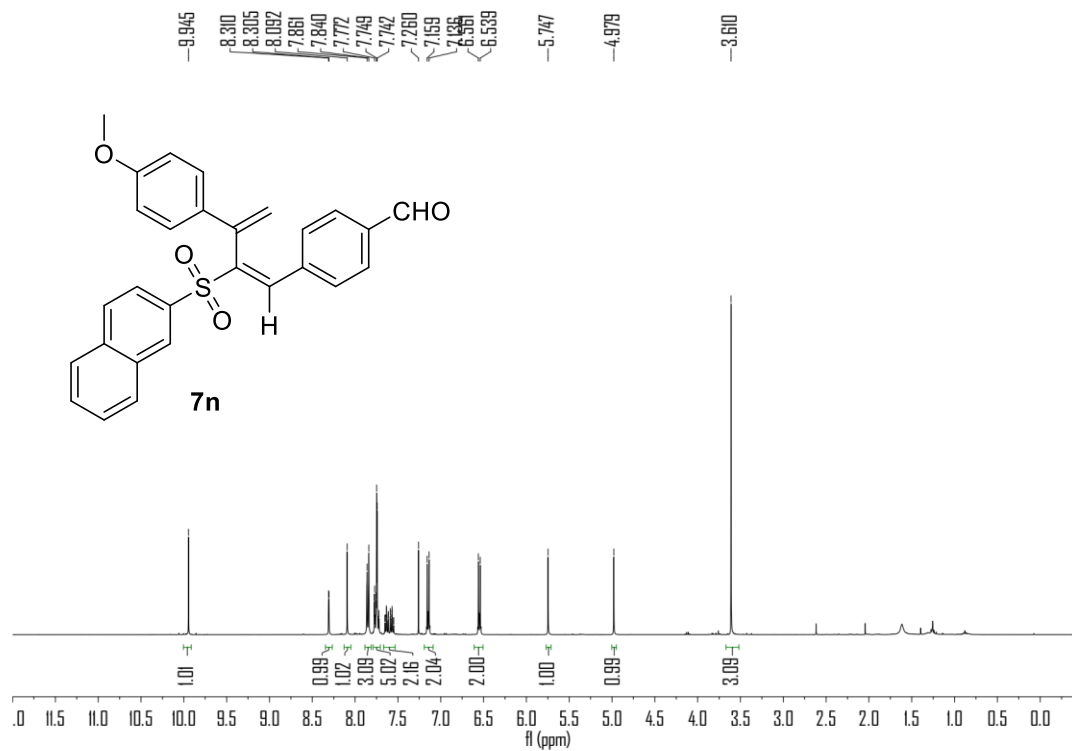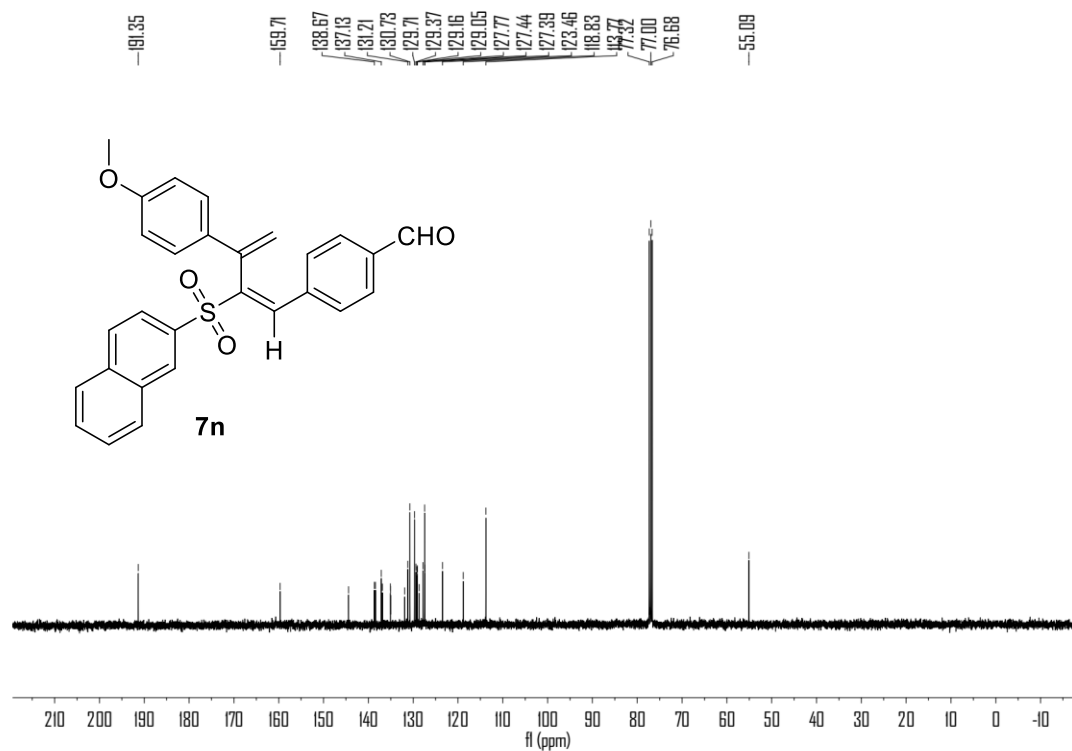

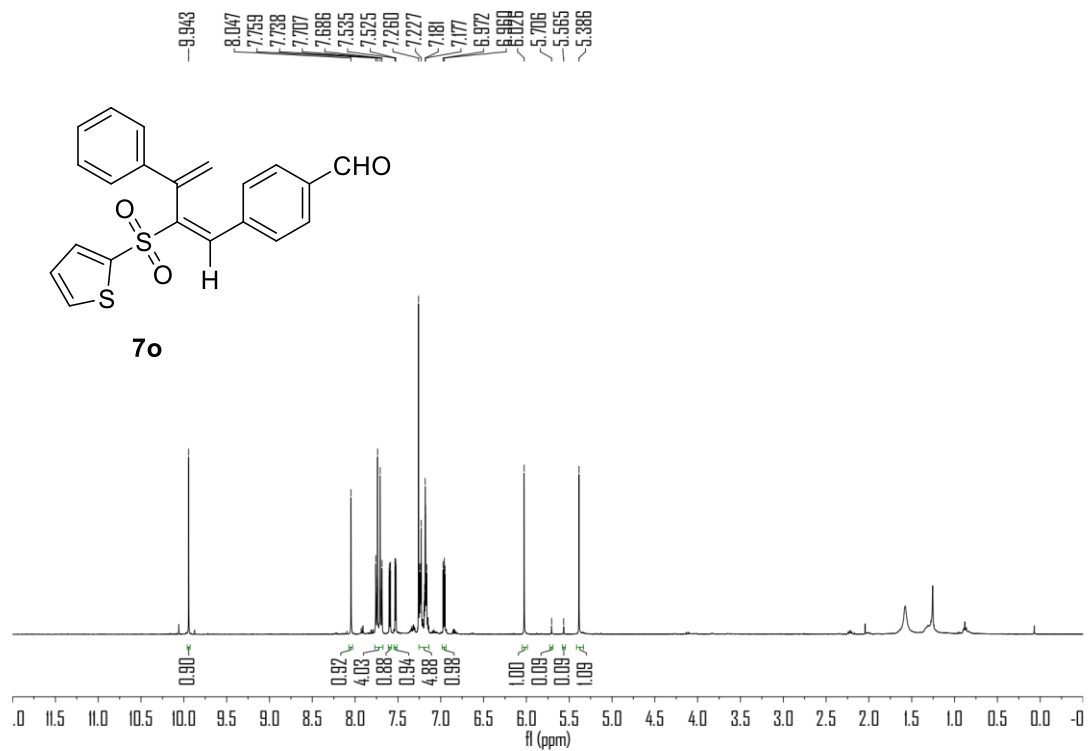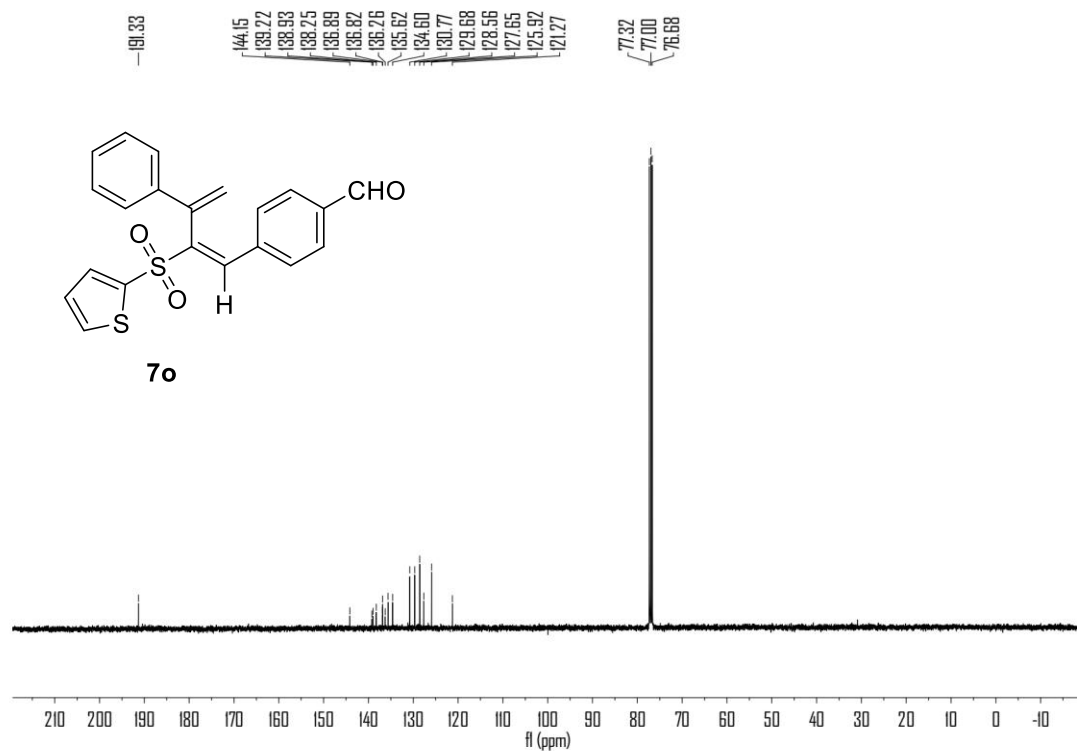

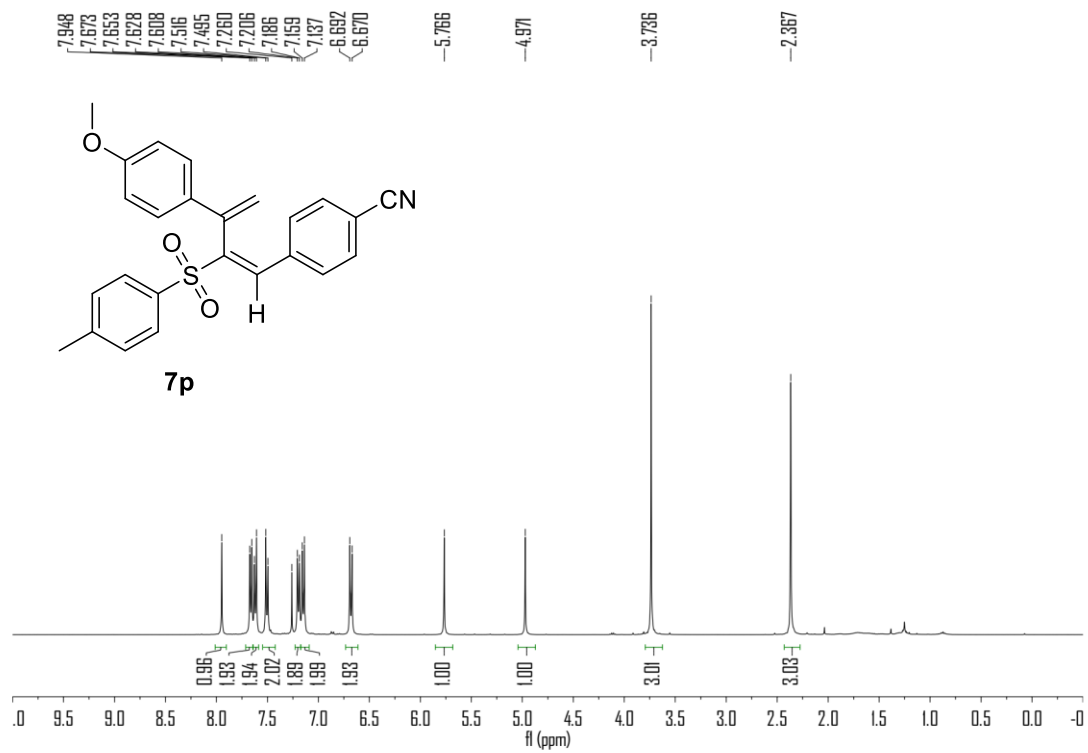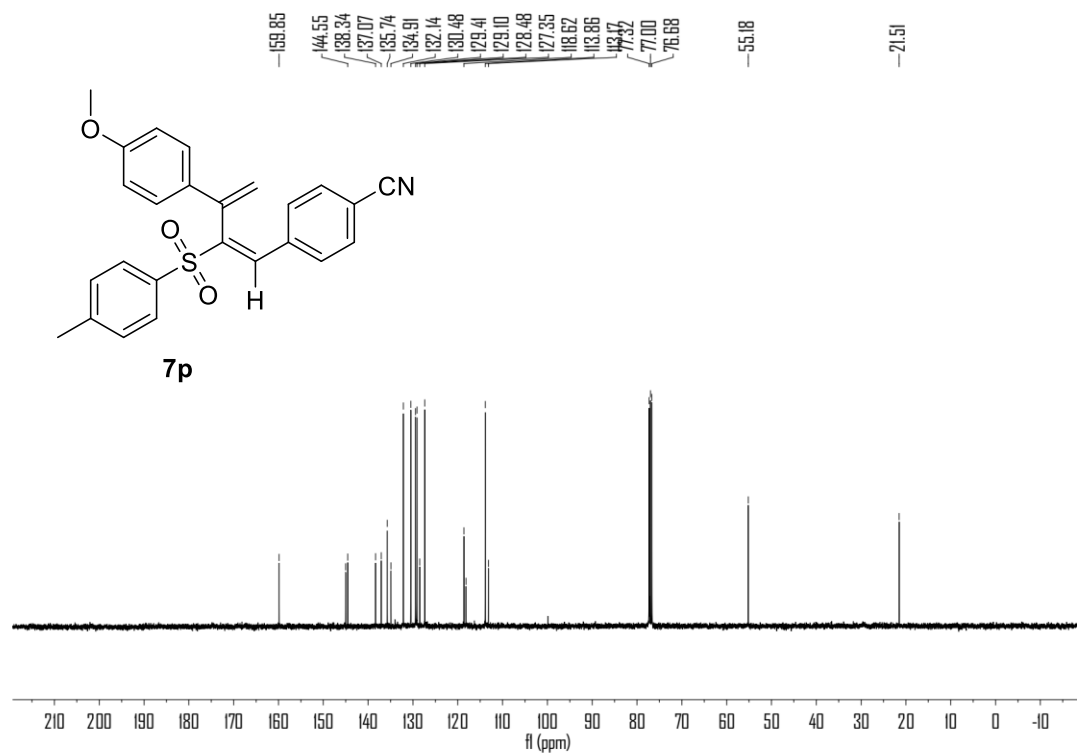

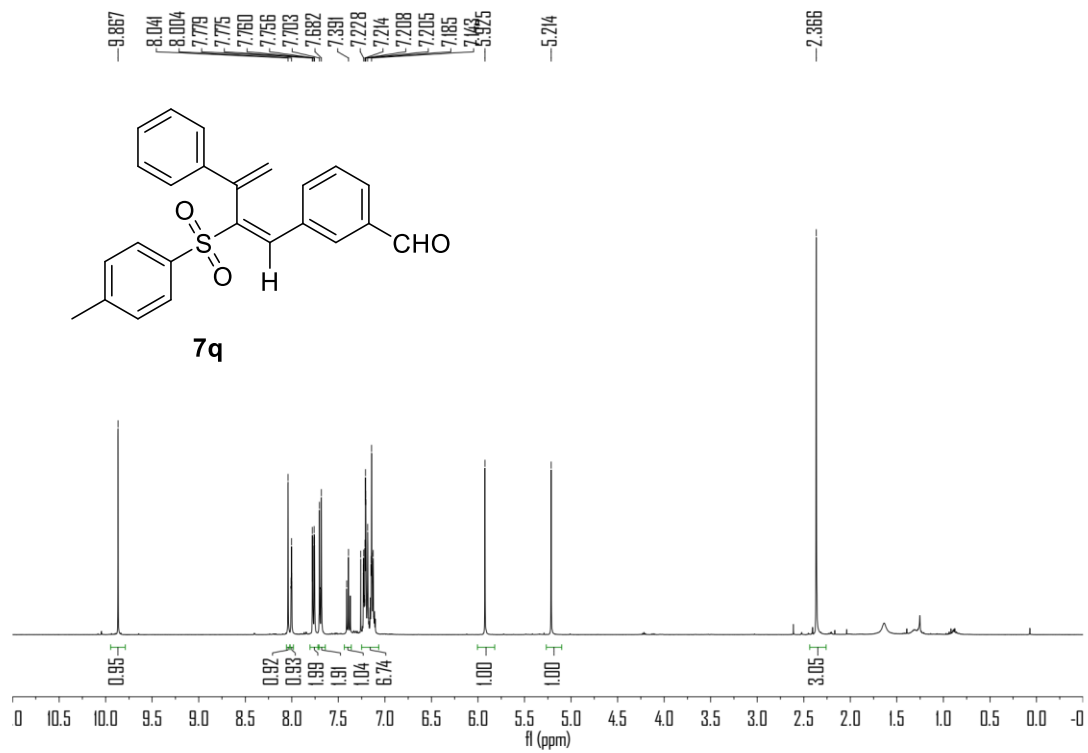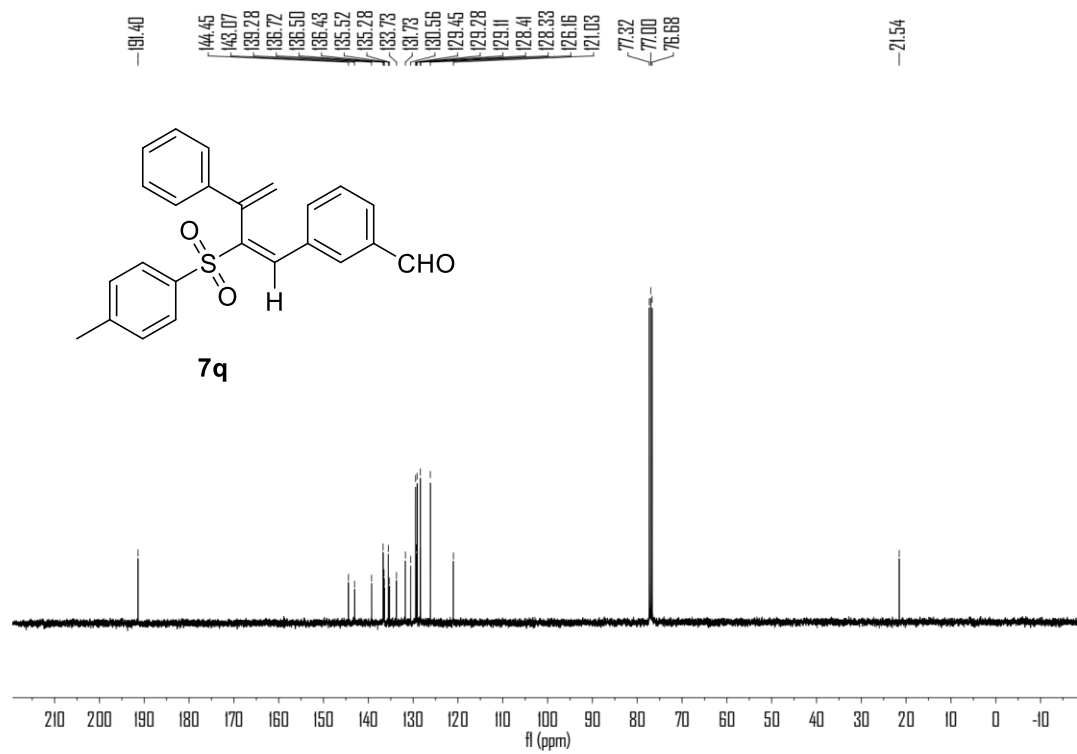



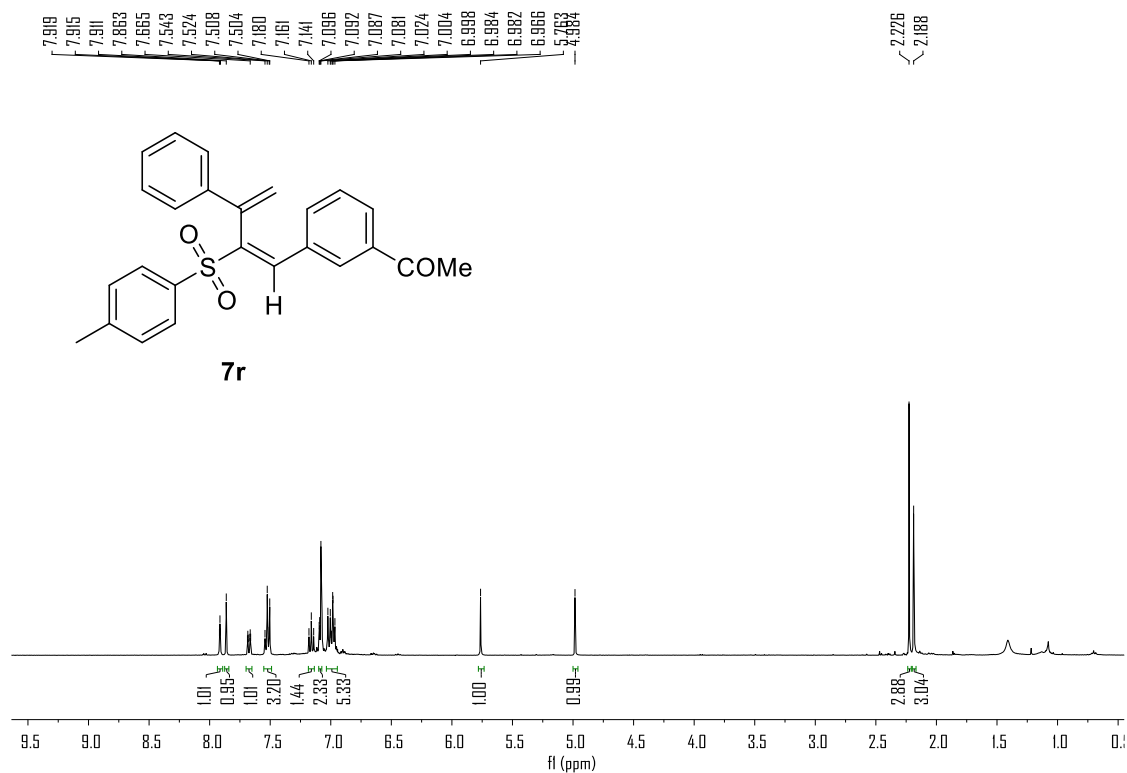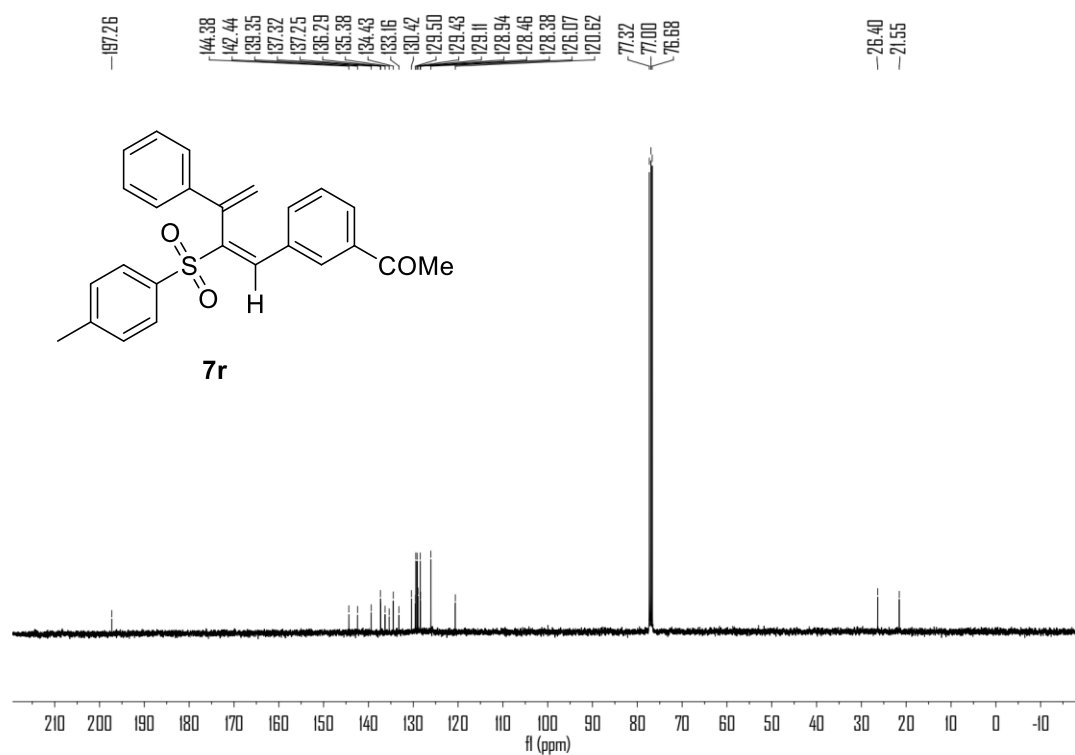

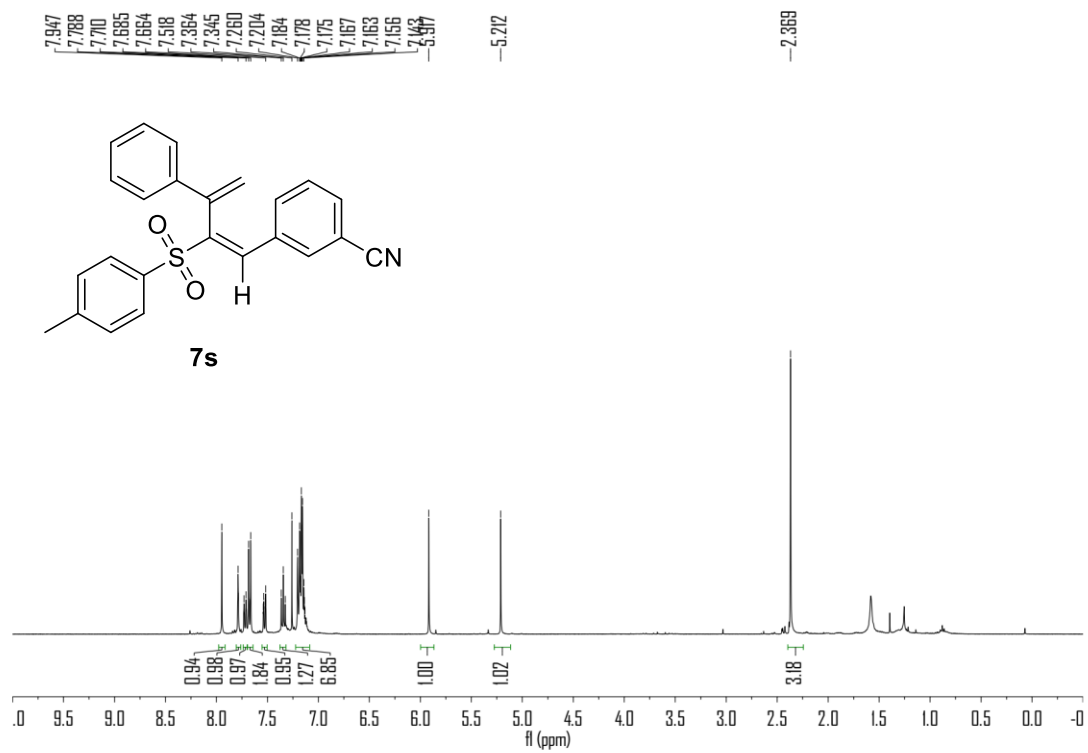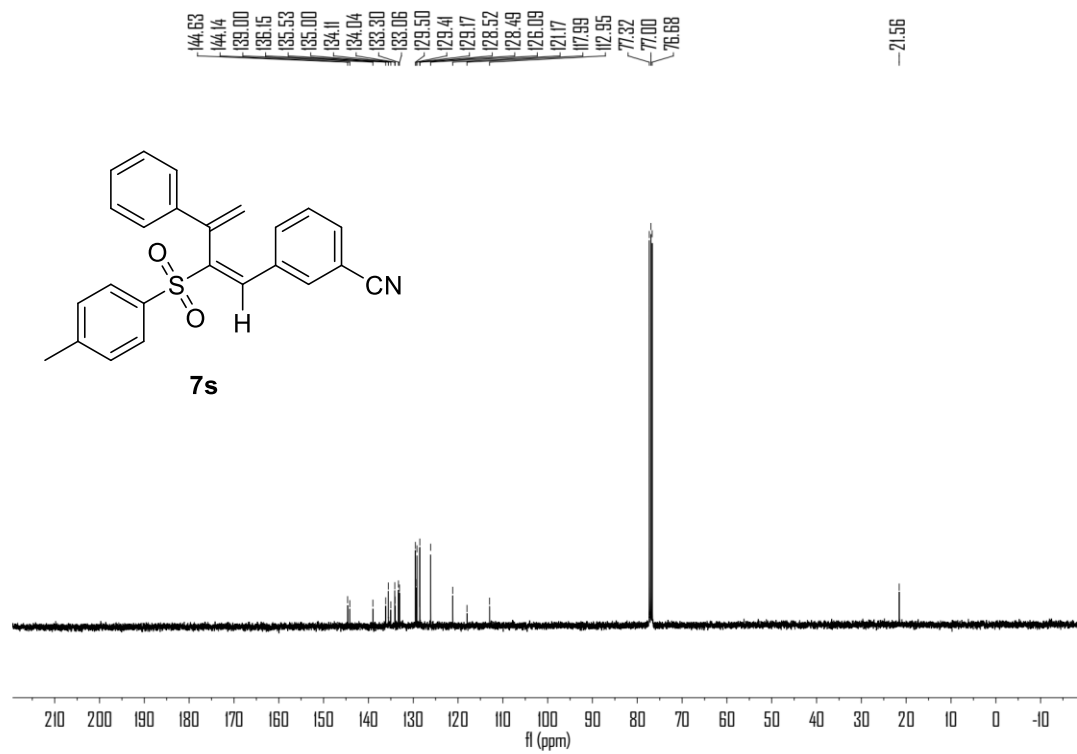

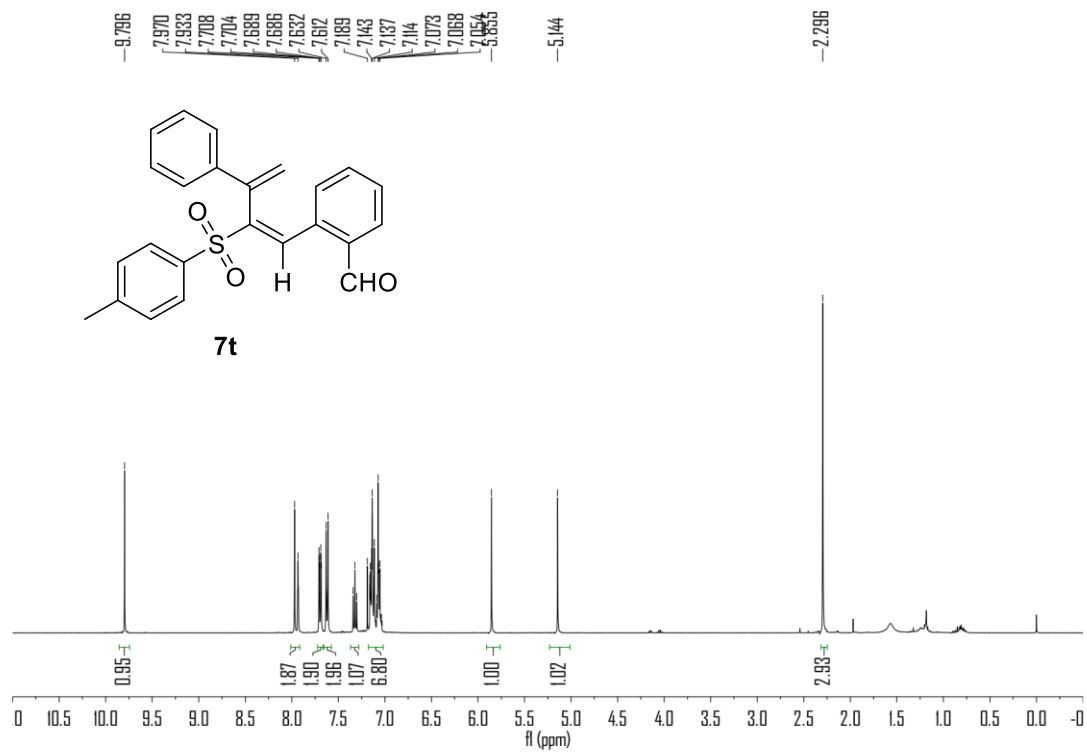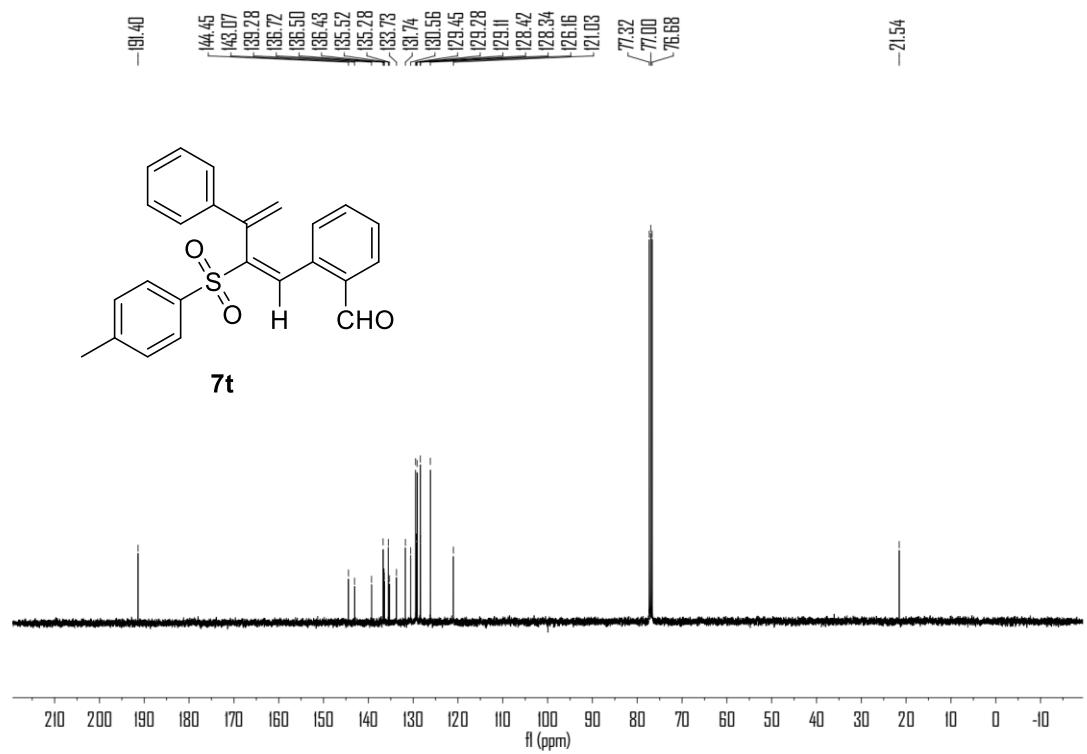

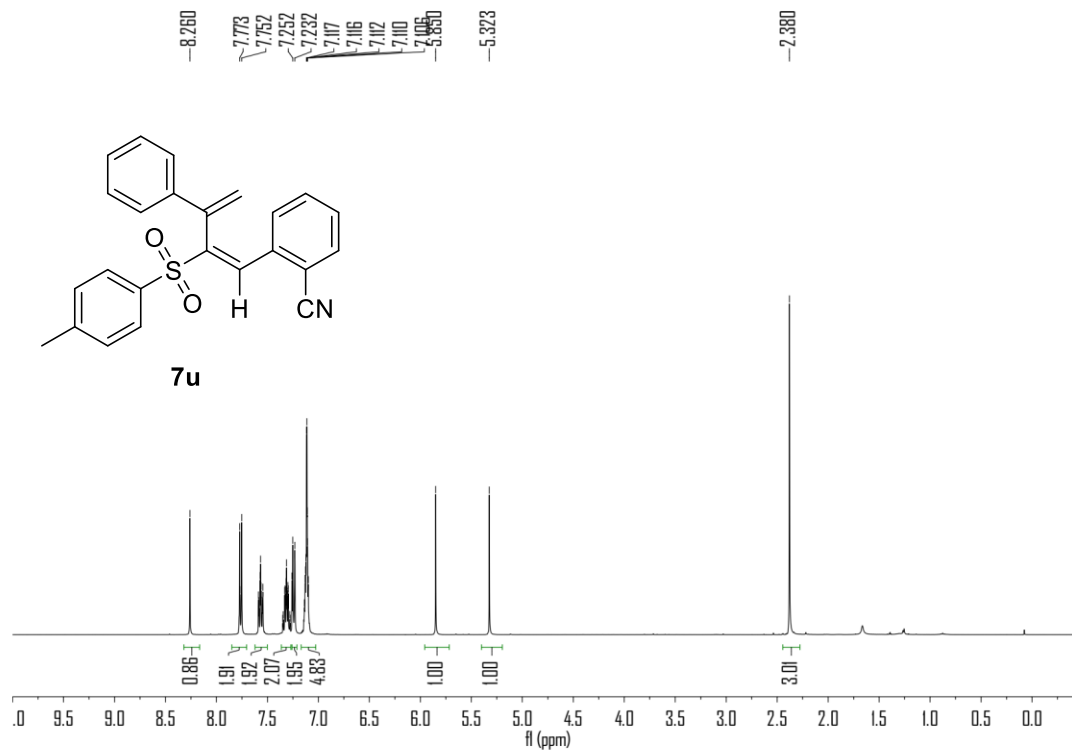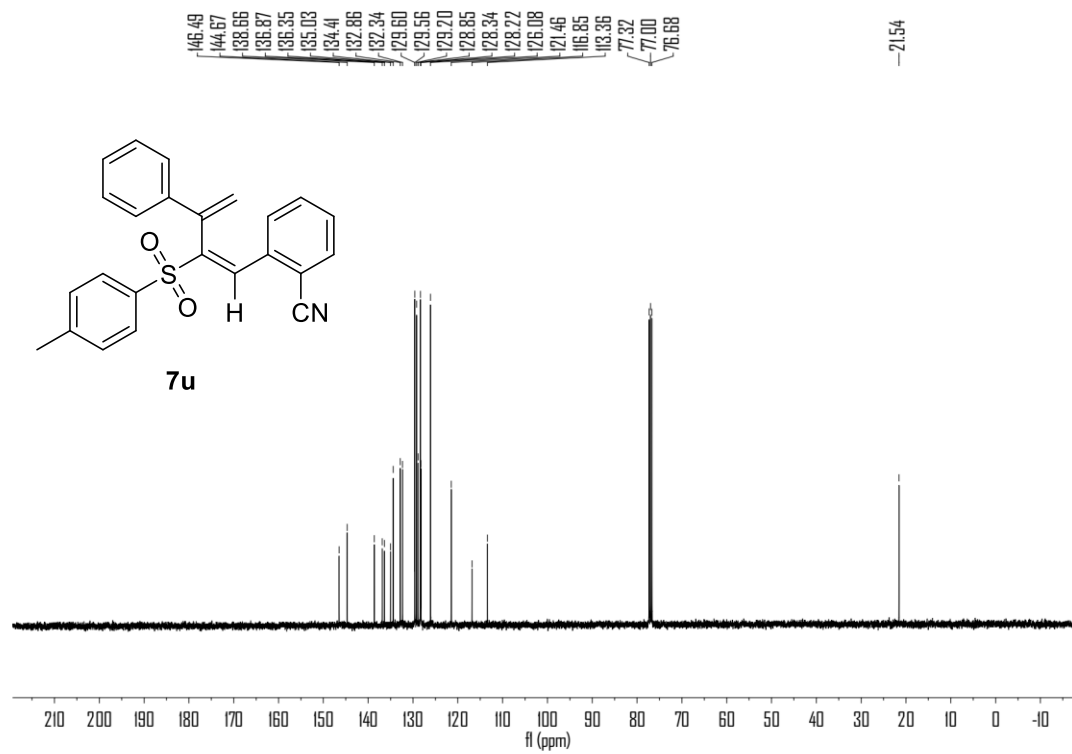

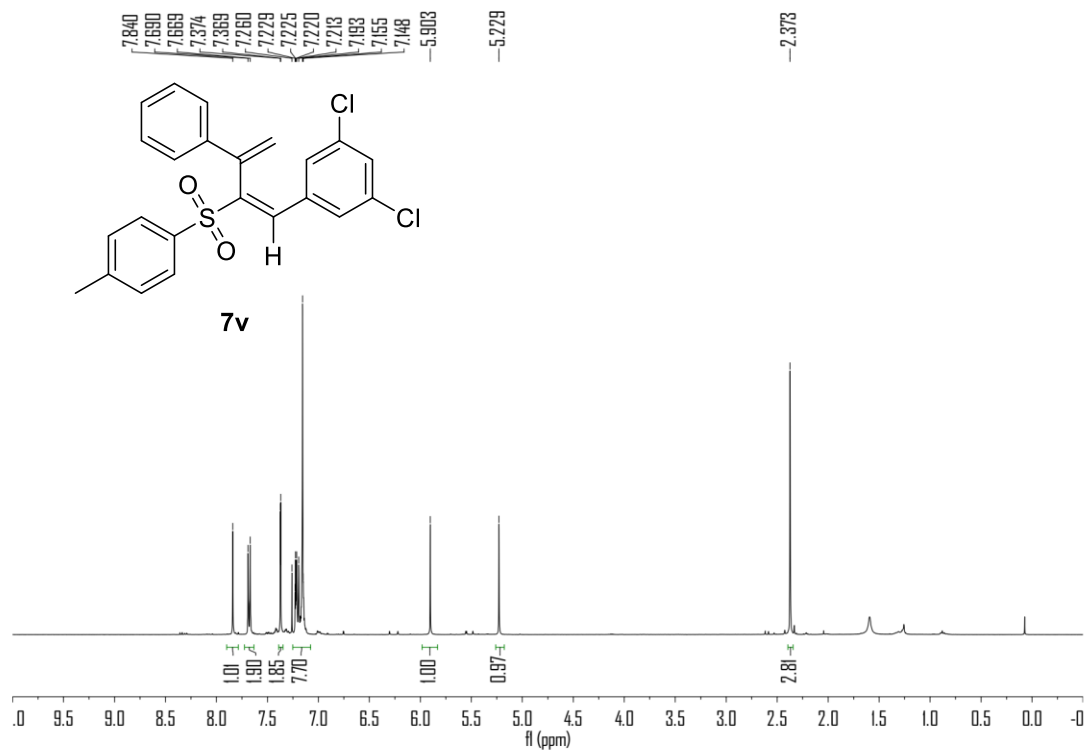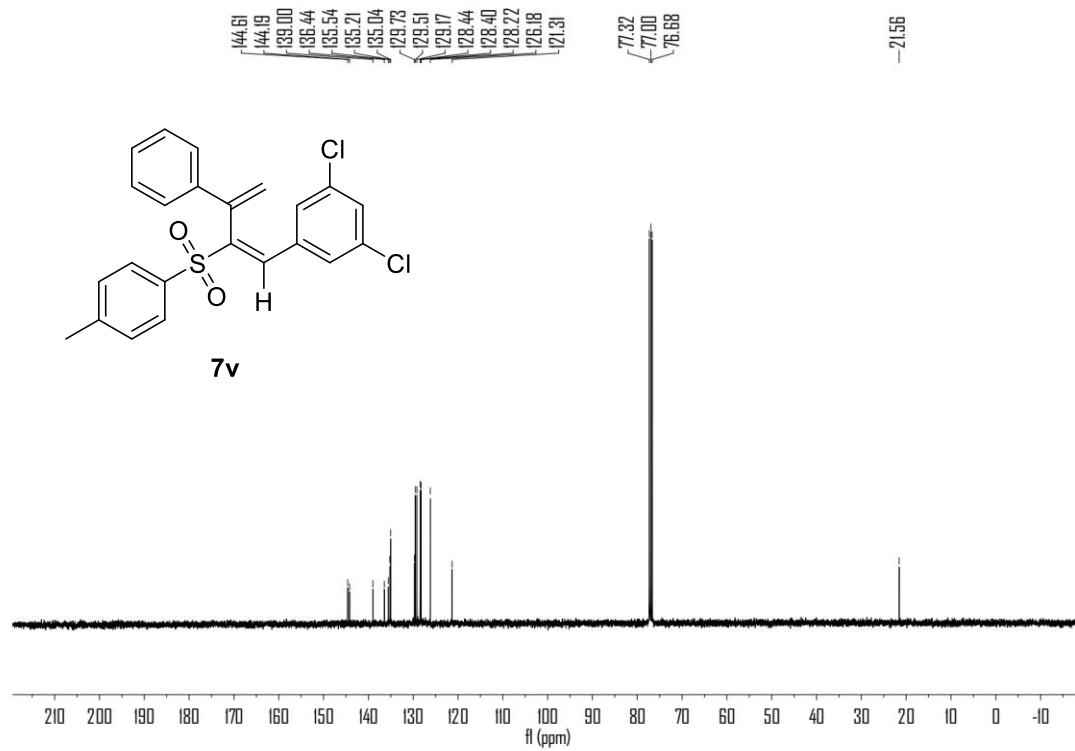

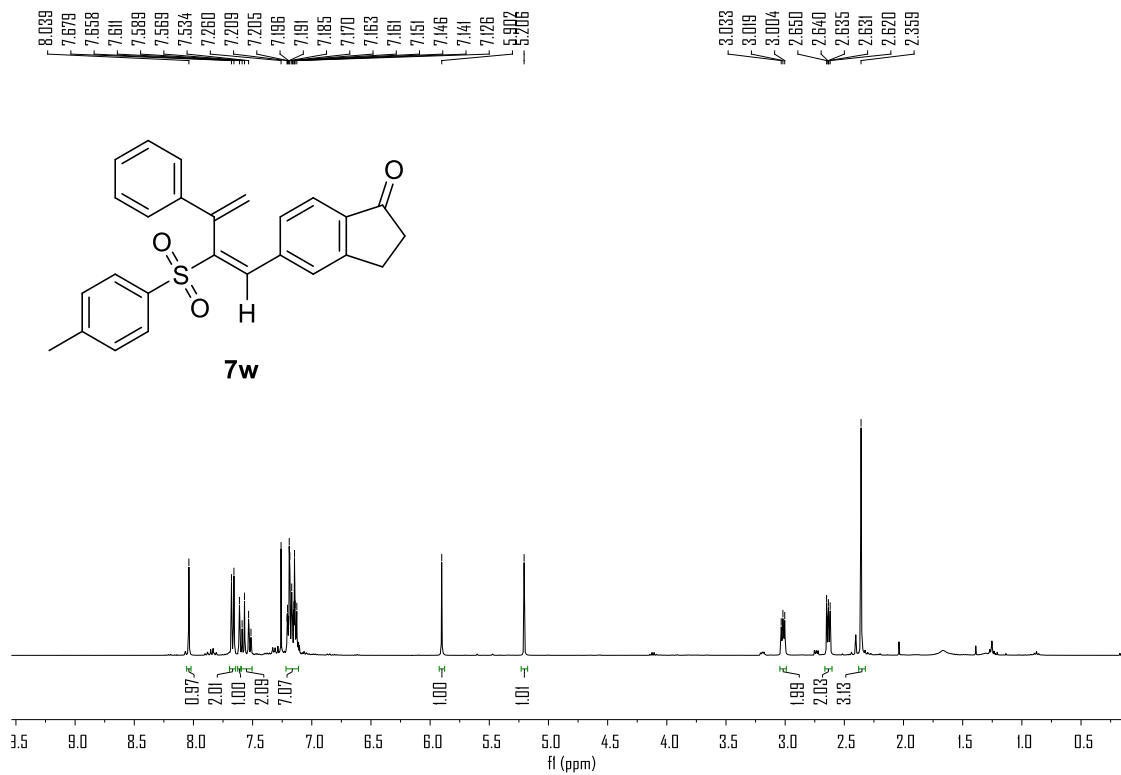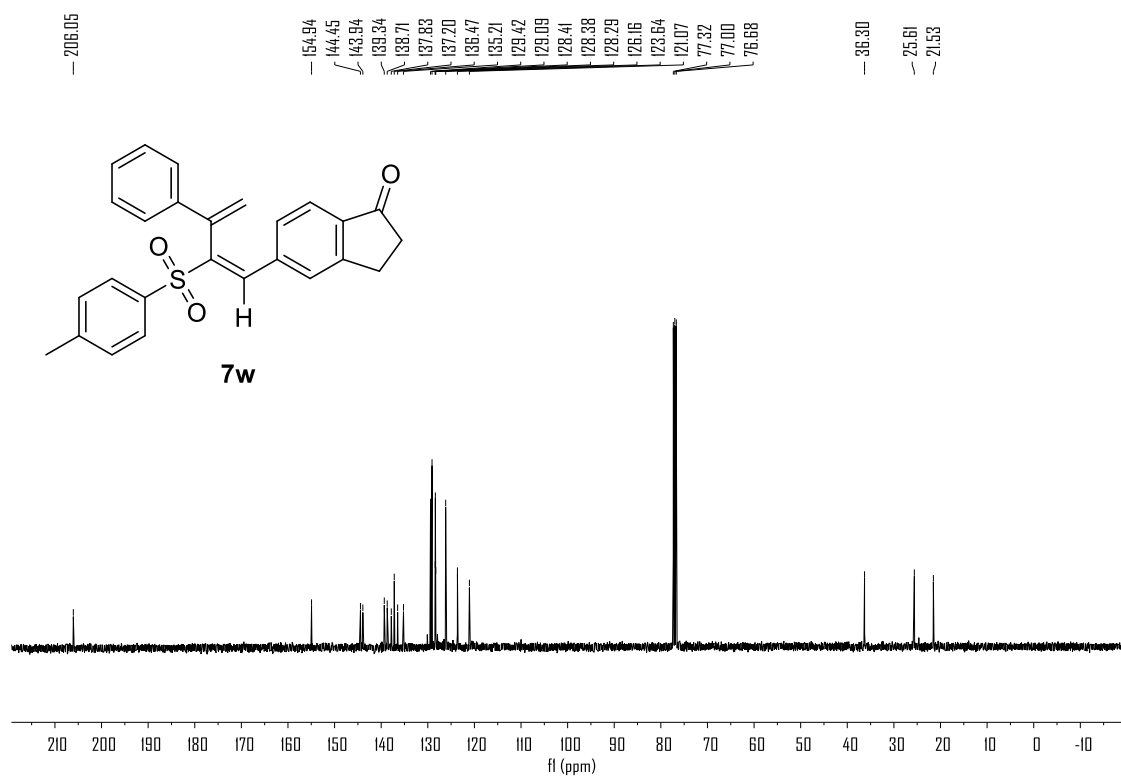

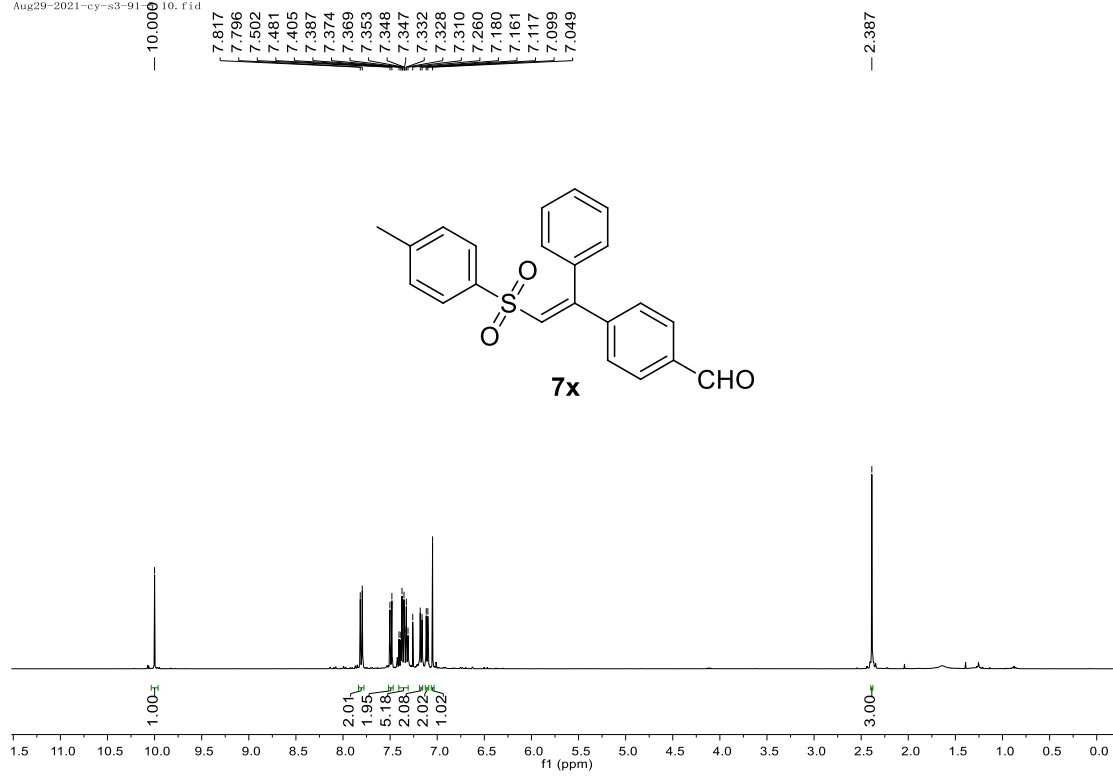

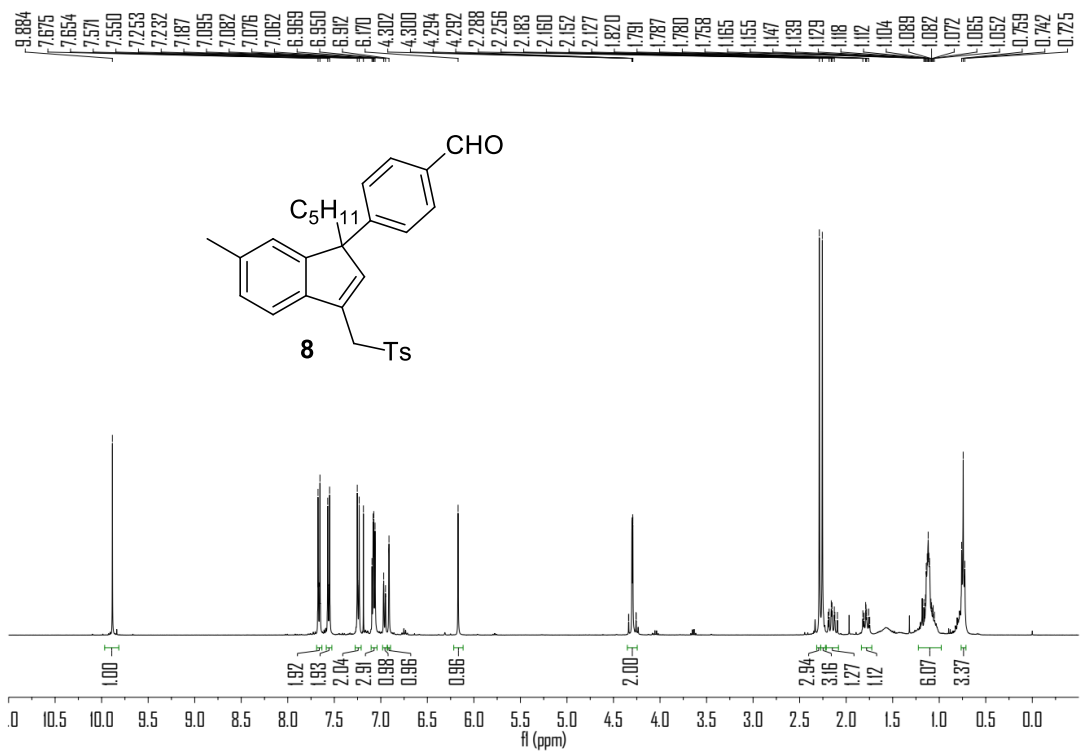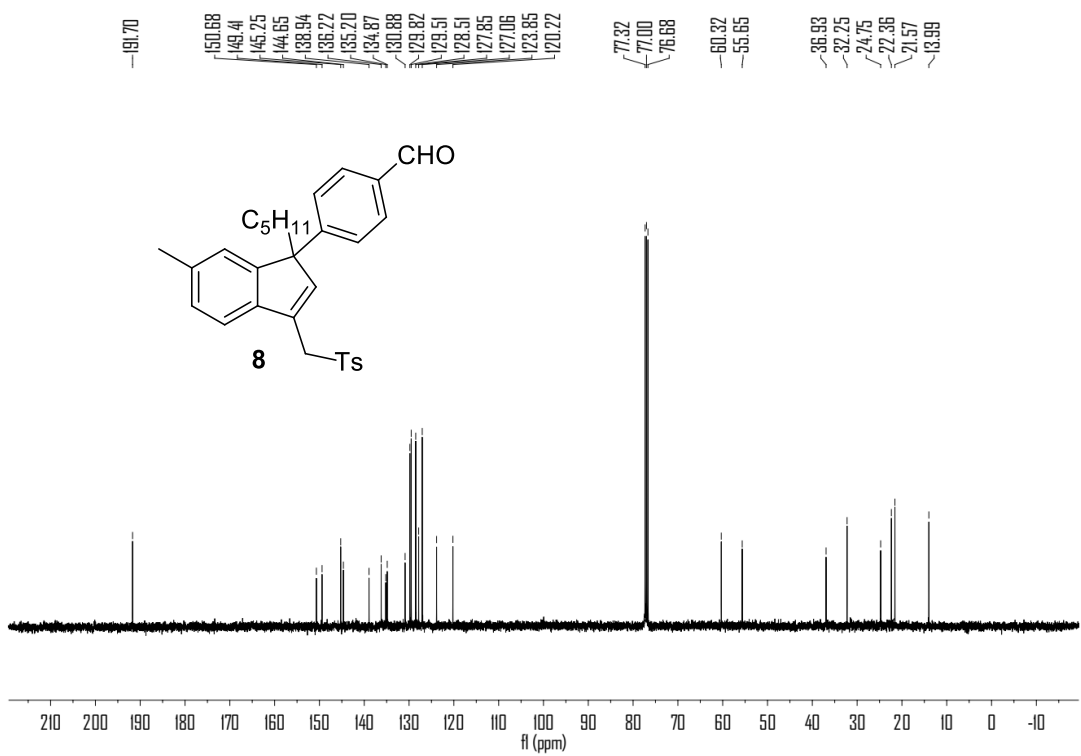



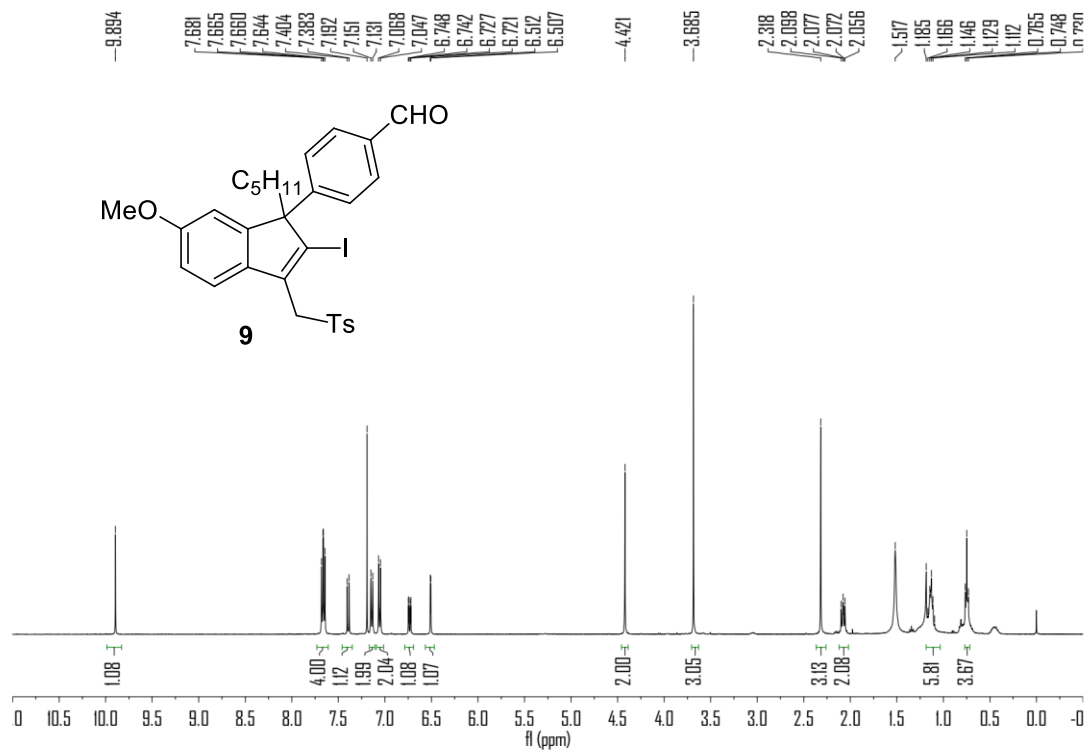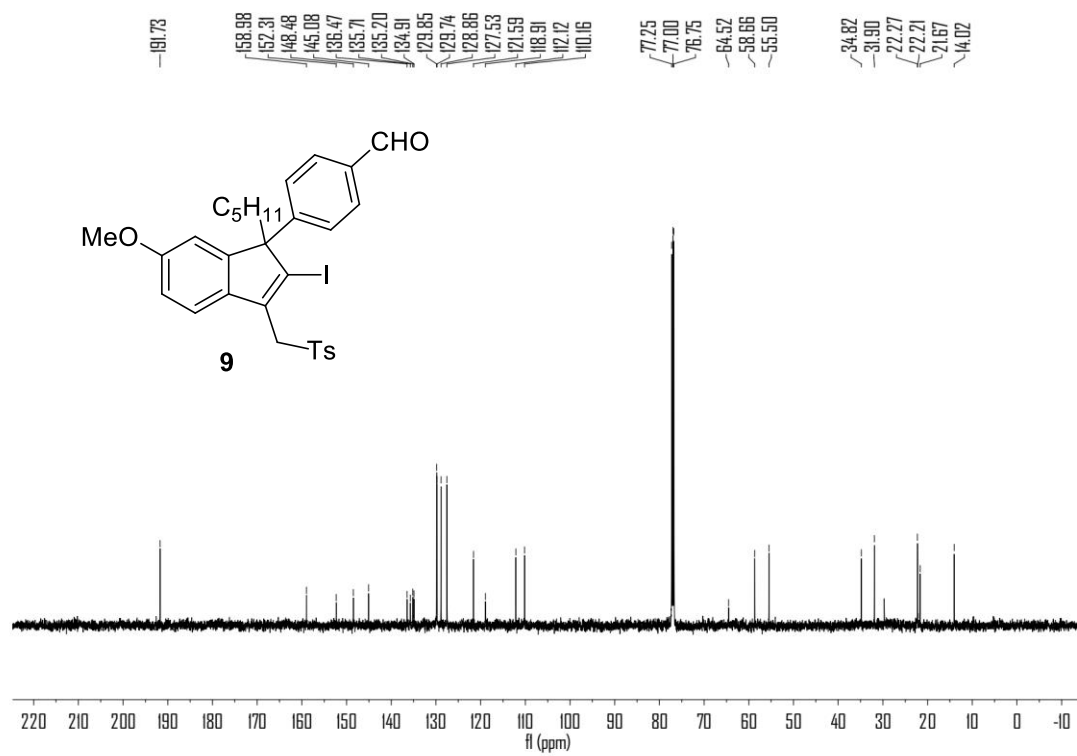

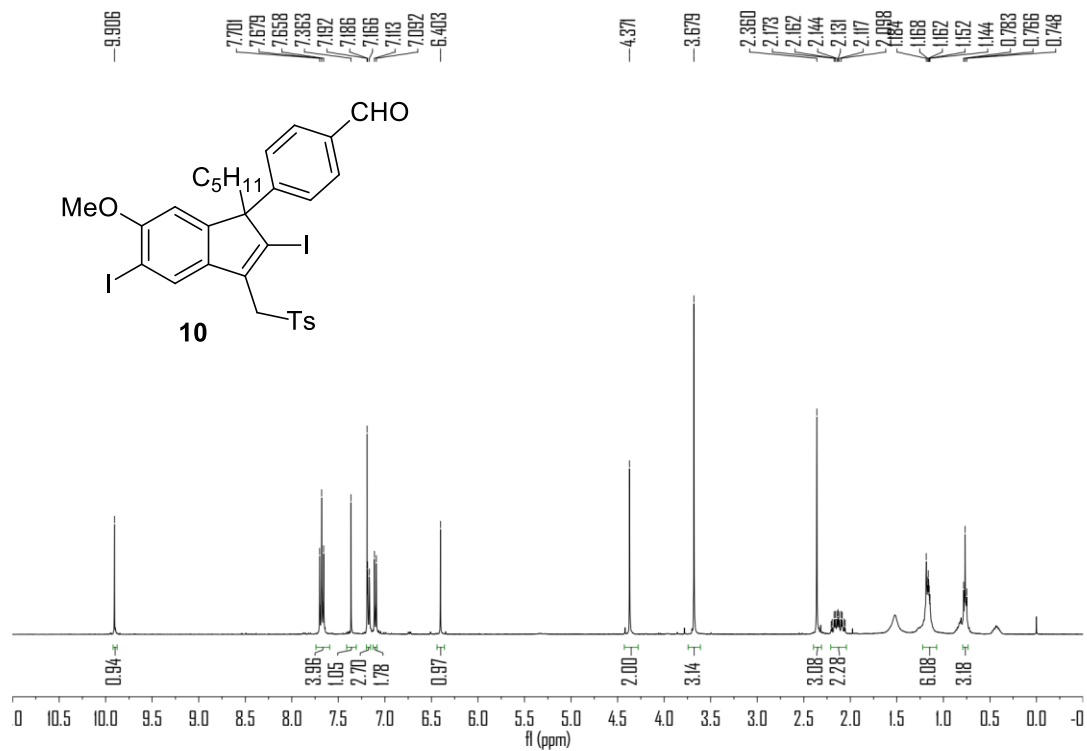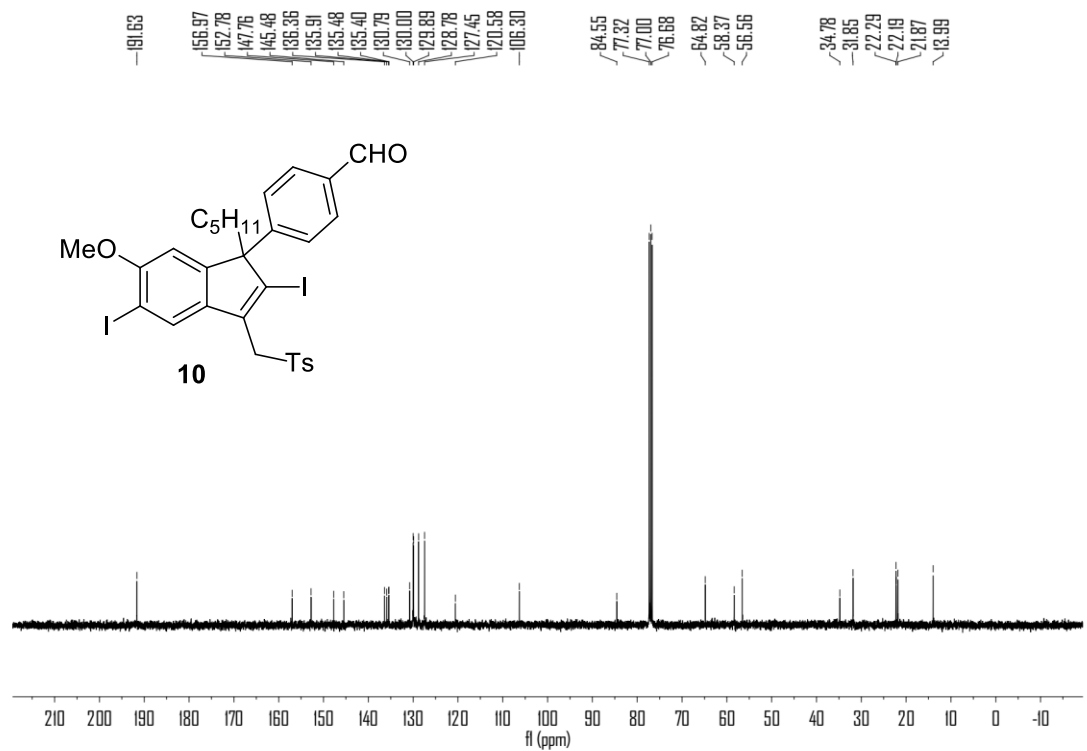

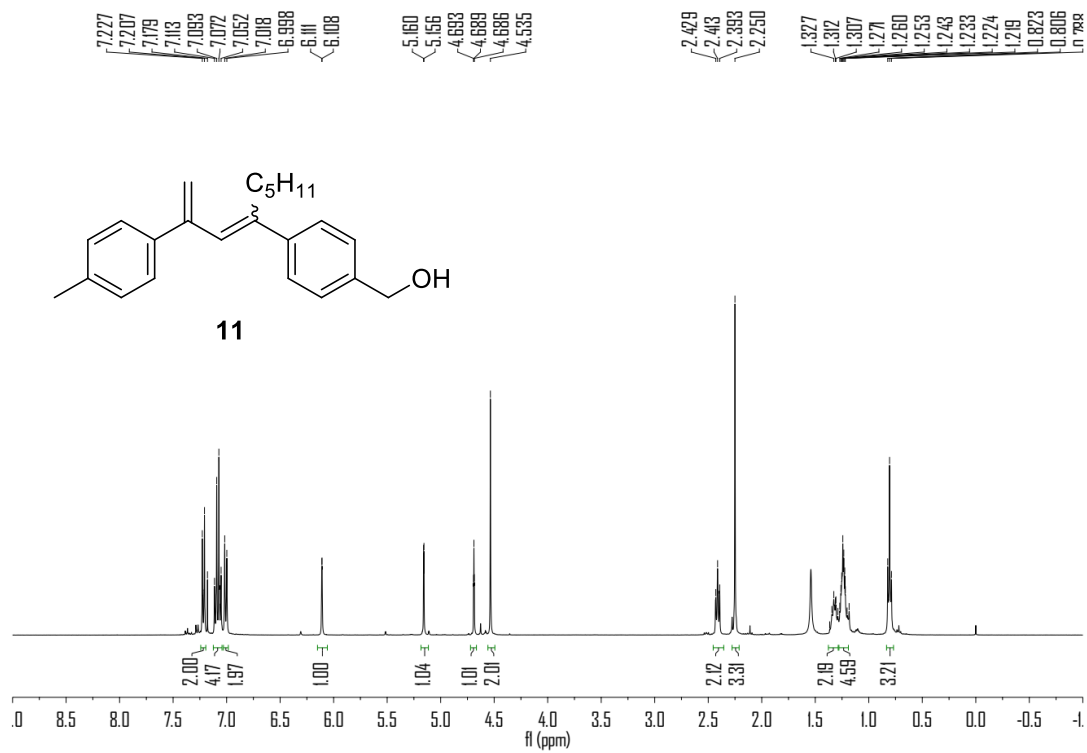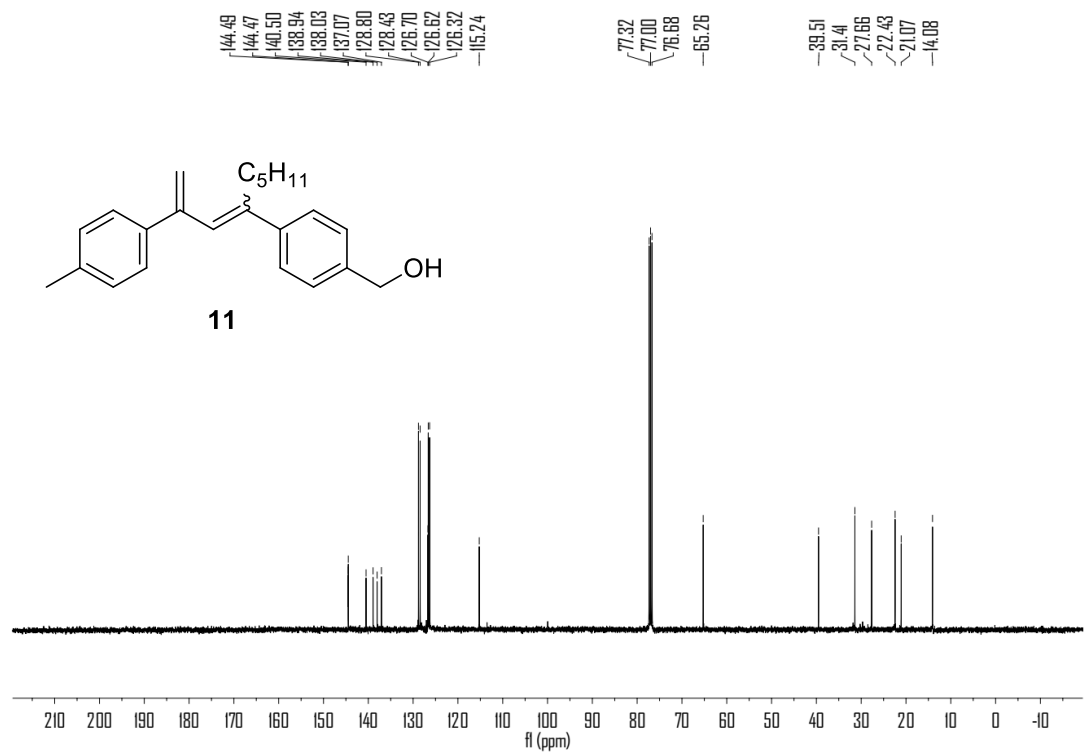

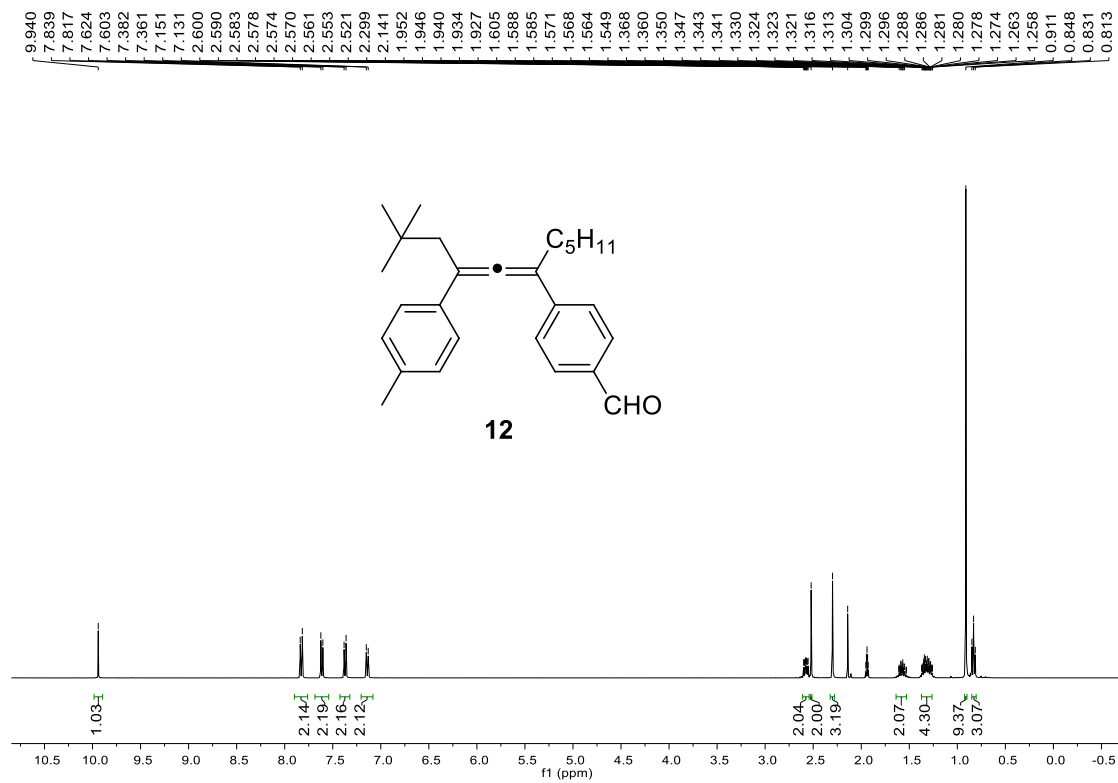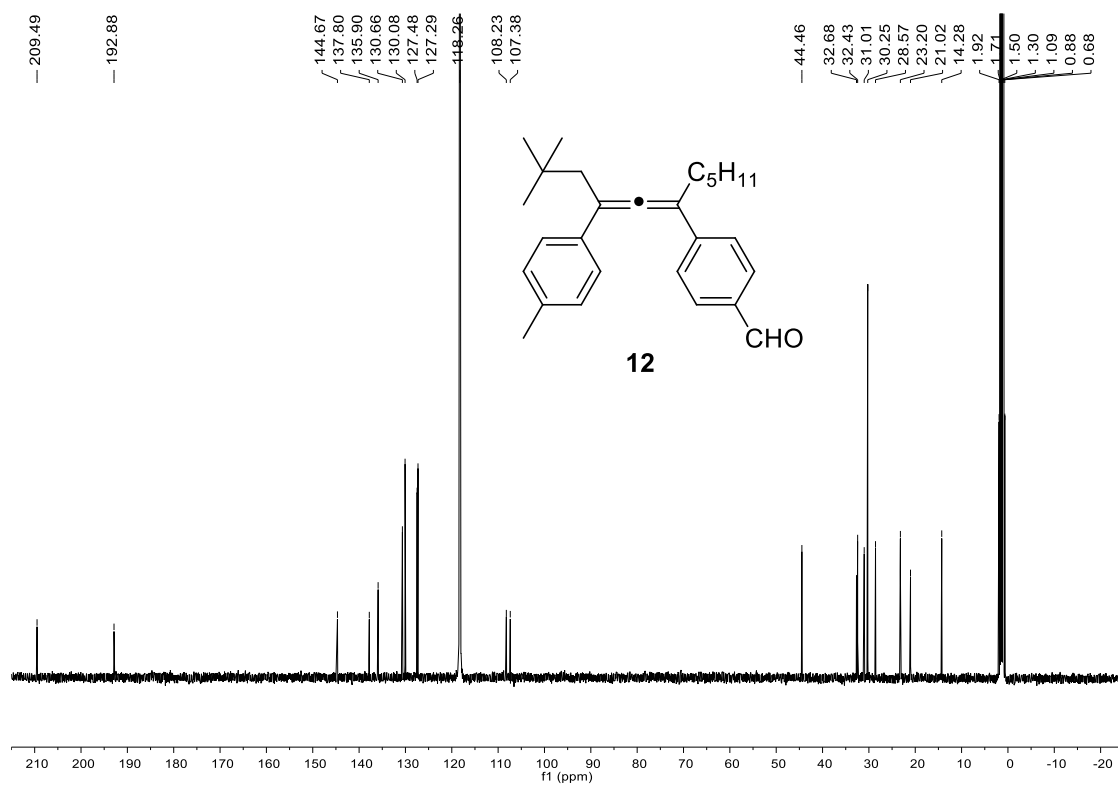

7.994  
7.653  
7.633  
7.590  
7.569  
7.369  
7.348  
7.260  
7.243  
7.238  
7.165  
7.160  
7.155  
7.145  
7.143  
7.141  
5.880  
5.878  
5.736  
5.090  
5.089  
4.081  
4.066  
4.064  
4.061  
4.057  
4.052  
4.046  
4.031  
4.023  
4.008  
4.002  
3.998  
3.993  
3.990  
3.988  
3.988  
3.974  
2.350

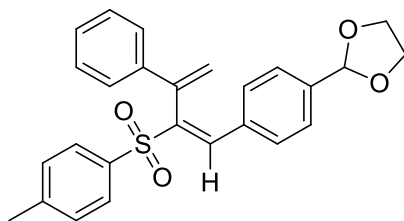

13

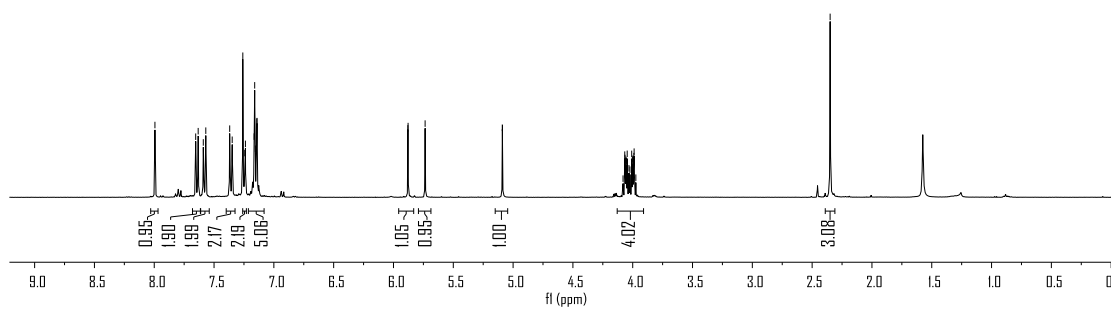

144.13  
141.47  
139.97  
139.57  
137.97  
136.47  
135.59  
133.46  
130.46  
129.30  
129.00  
128.39  
128.19  
126.69  
126.17  
120.67  
103.03  
77.25  
77.00  
76.75  
65.32  
21.52

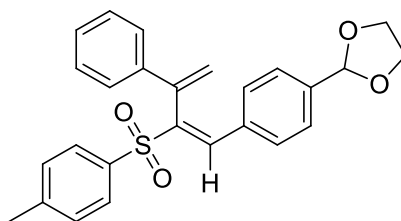

13

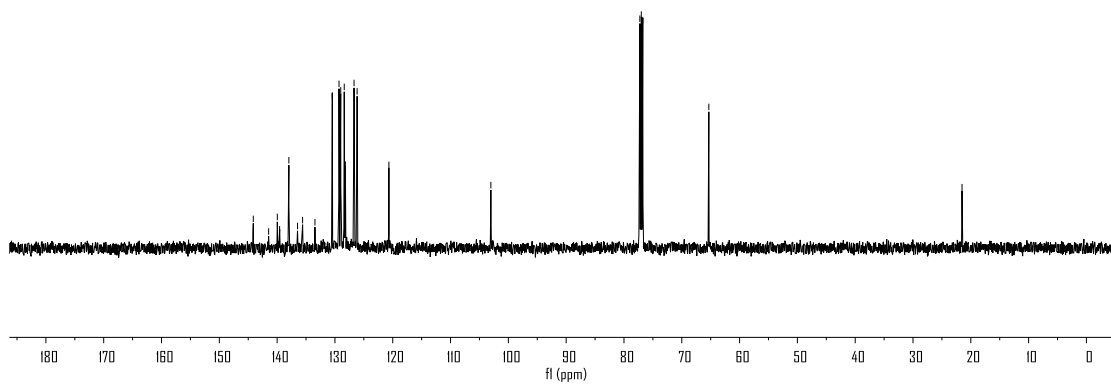

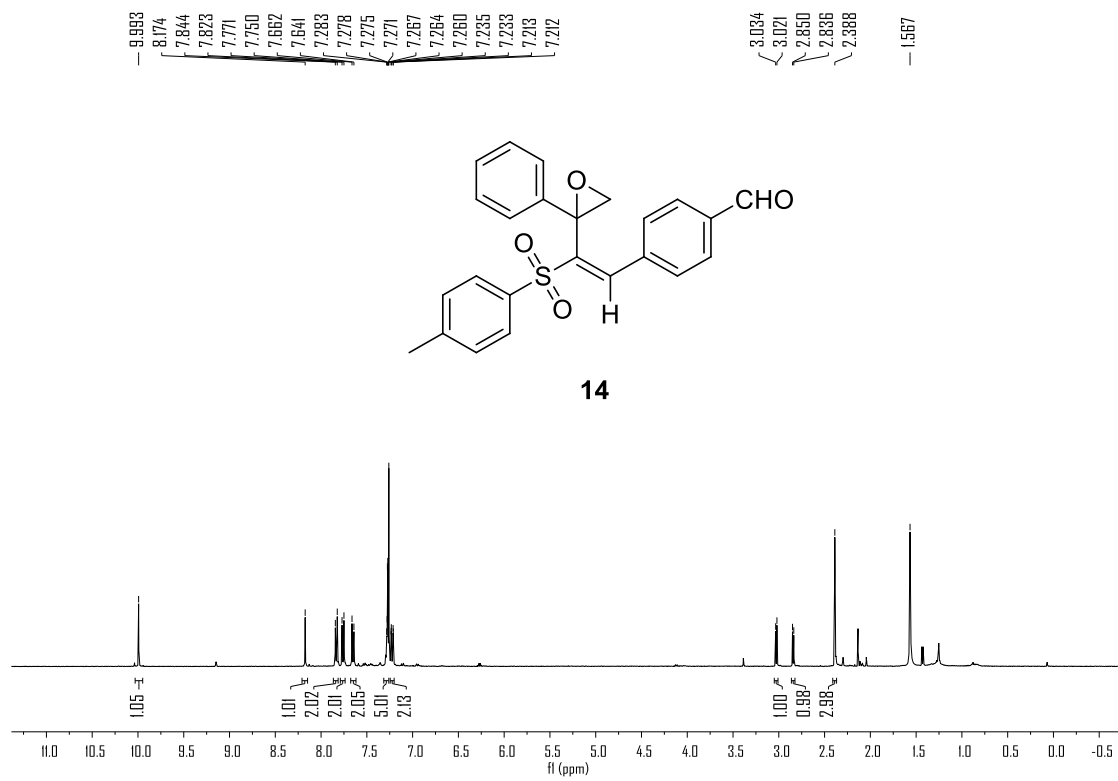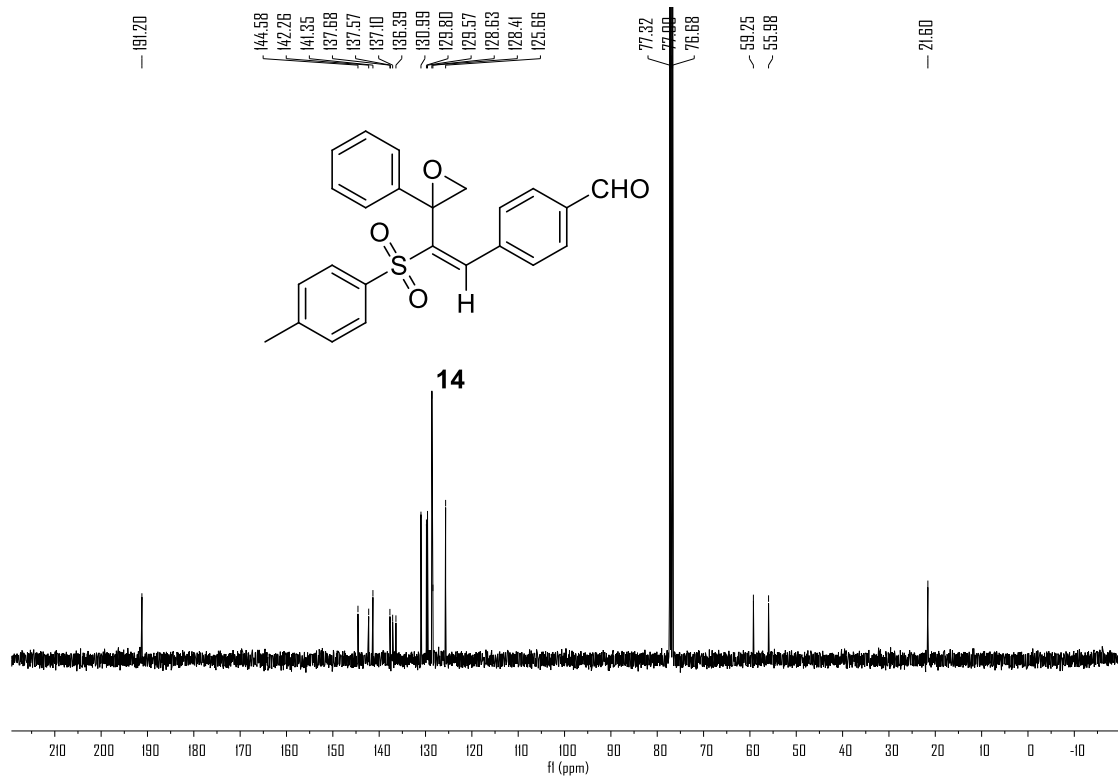

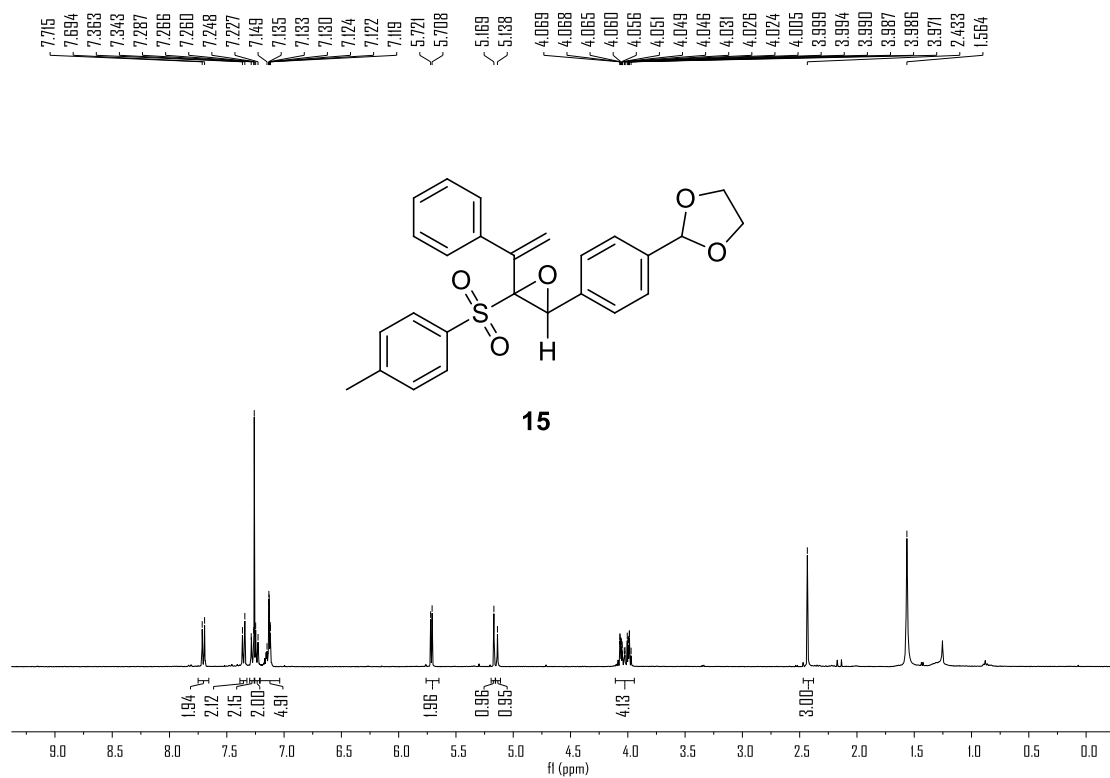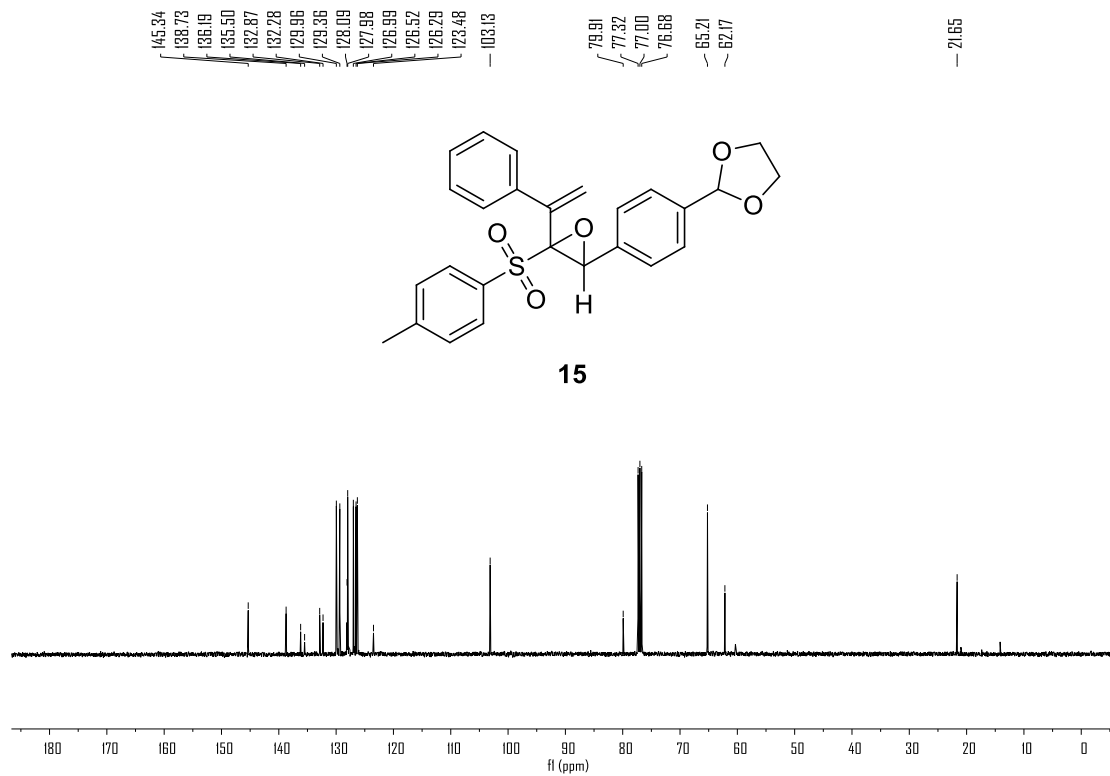

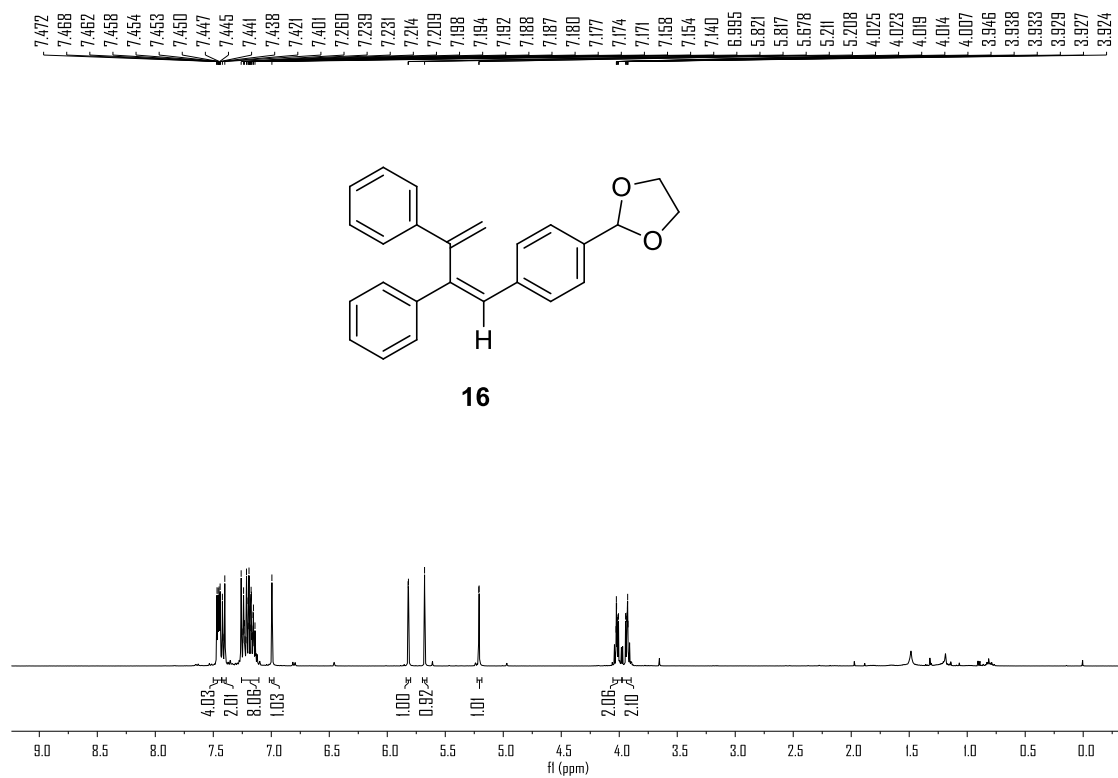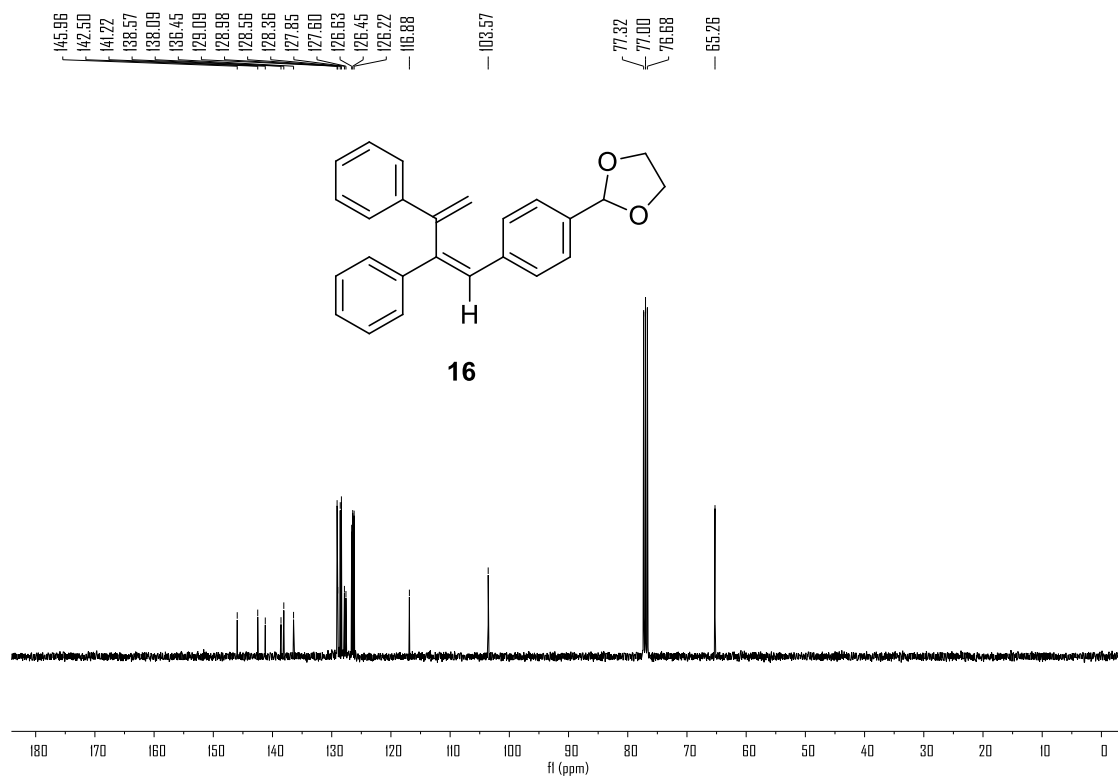



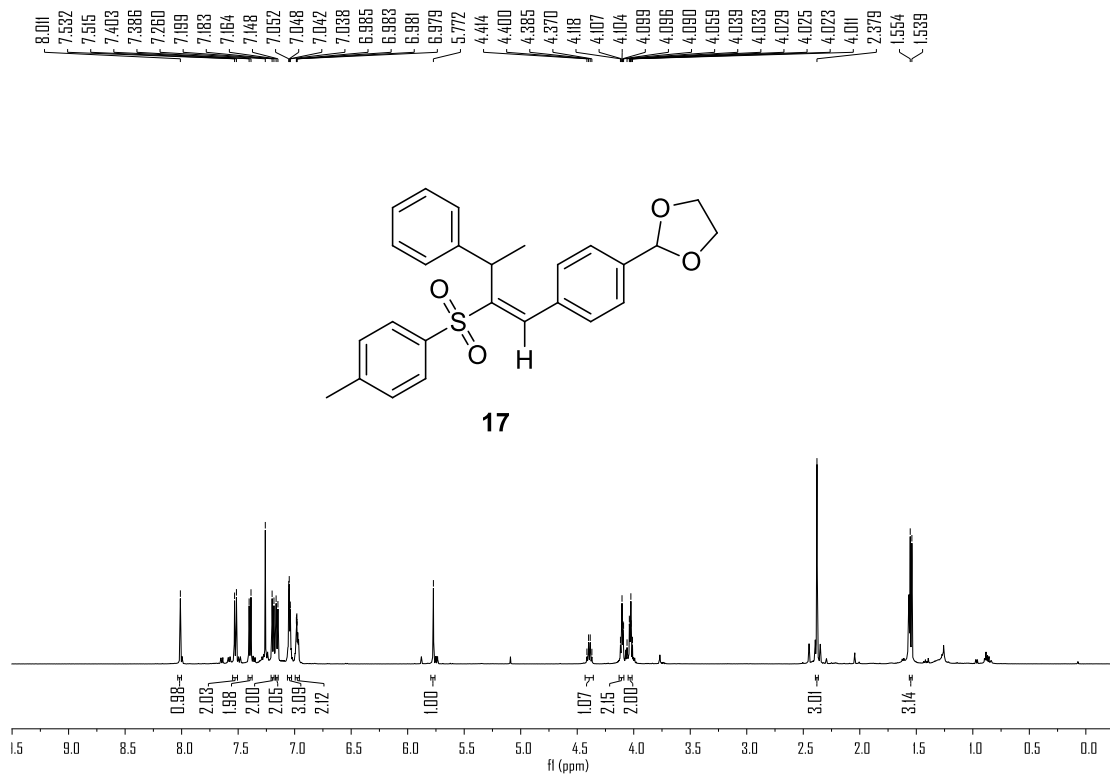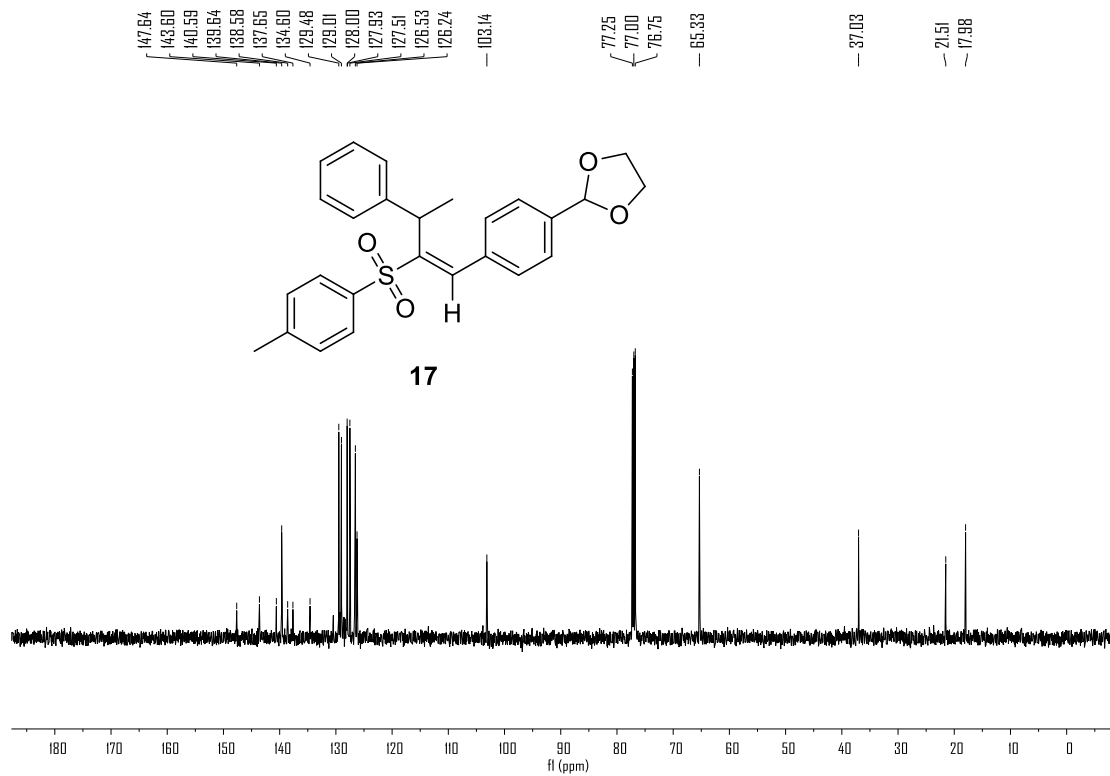

Nov05-2020-cy-s2-102-2.10.fid

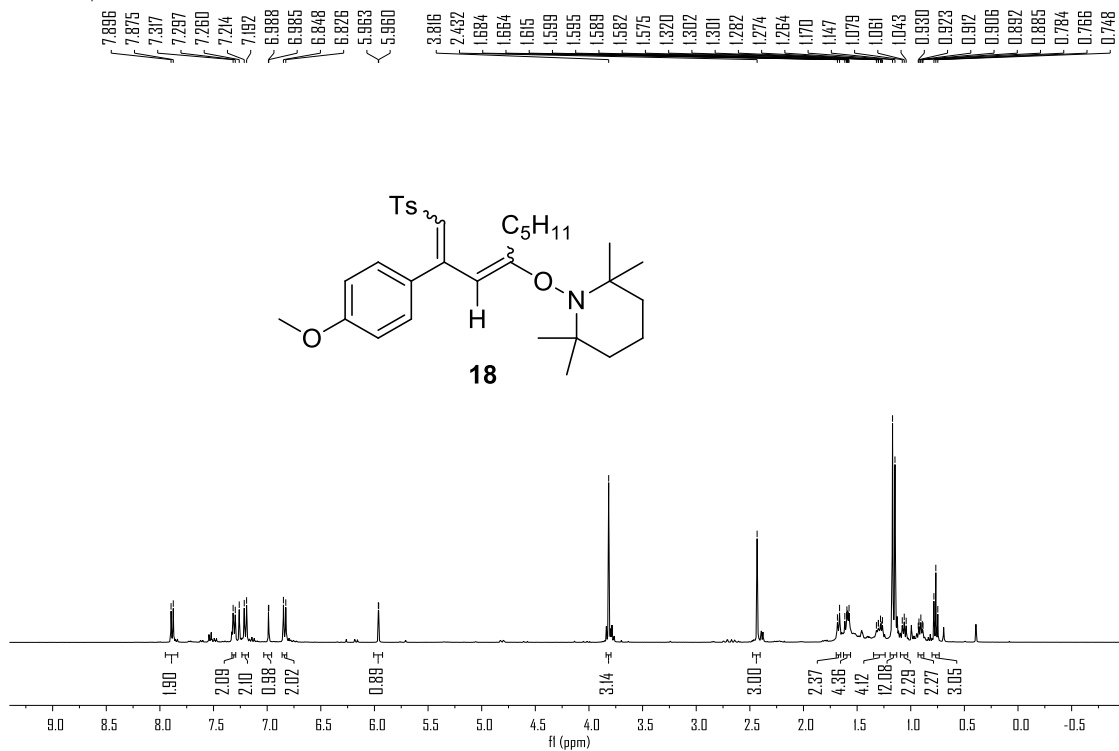

Nov07-2020-cy-s2-102-2+3.23.fid

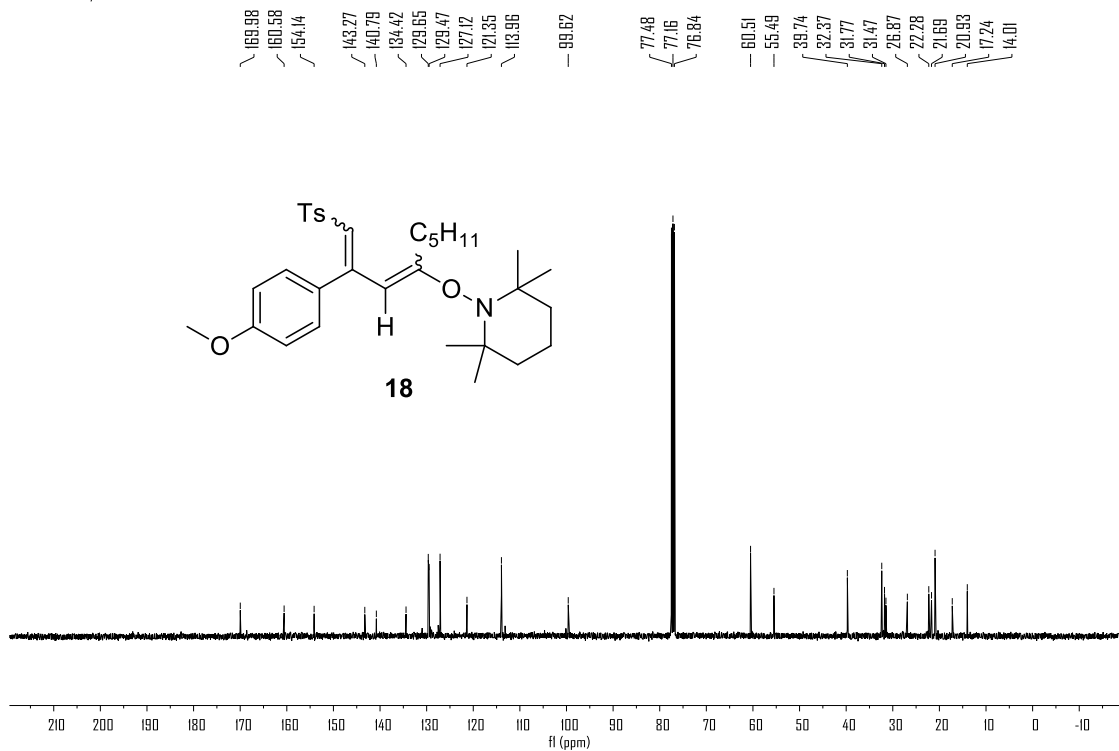

Supplement: SC-012-D1SC04320J-s001.pdf [file SC-012-D1SC04320J-s001.pdf]
